# Supplementary material for: Tailoring Carbene-Metal-Amides for Thermally Activated Delayed Fluorescence: A Computationally Guided Study on the Effect of Cyclic (Alkyl)(amino)carbenes
Source: Preprints.org preprint supplement (doi:10.20944/preprints202305.0227.v1), 2023-05-04
Supplement: Supplementary file 1 [file supplementary]

## Supplementary Materials

# Tailoring Carbene-Metal-Amides for Thermally Activated Delayed Fluorescence: A Computationally Guided Study on the Effect of Cyclic (Alkyl)(amino)carbenes

Nguyen Le Phuoc <sup>1</sup>, Alexander C. Brannan <sup>2</sup>, Alexander S. Romanov <sup>2</sup>, Mikko Linnolahti <sup>1\*</sup>

<sup>1</sup> Department of Chemistry, University of Eastern Finland, FI-80101 Joensuu, Finland

<sup>2</sup> Department of Chemistry, University of Manchester, Oxford Rd. Manchester, M13 9PL, United Kingdom

\* Correspondence: mikko.linnolahti@uef.fi

## Computational Results

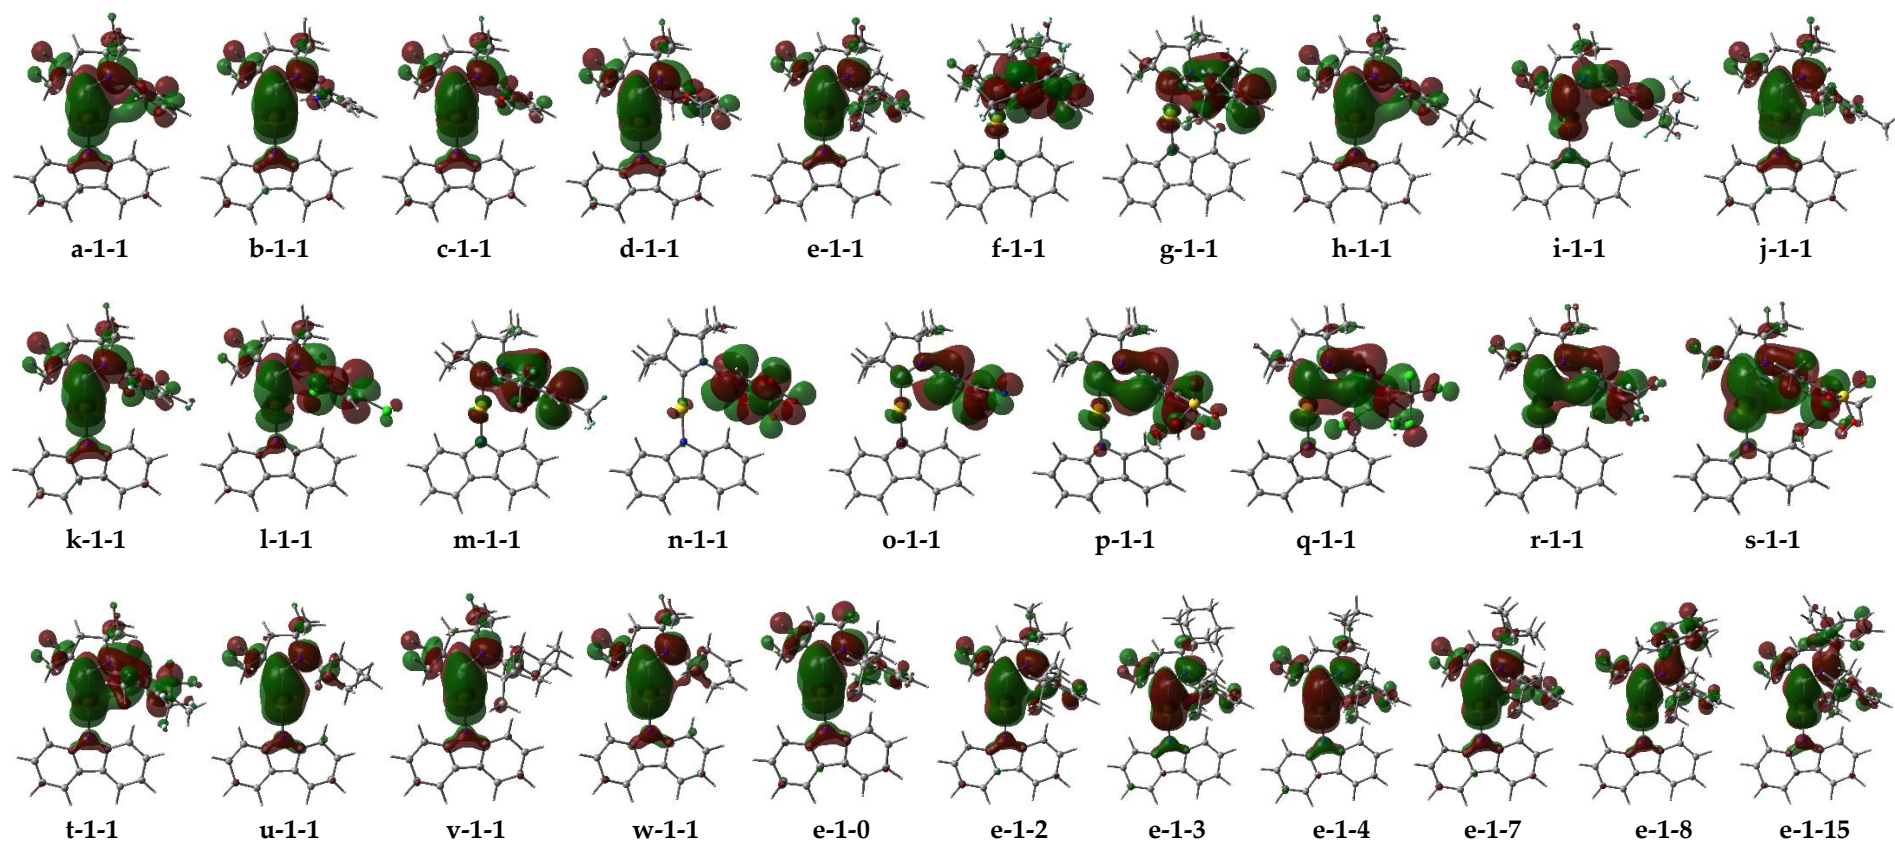

Figure S1. LUMO orbitals of complexes modified at positions 1 and 3

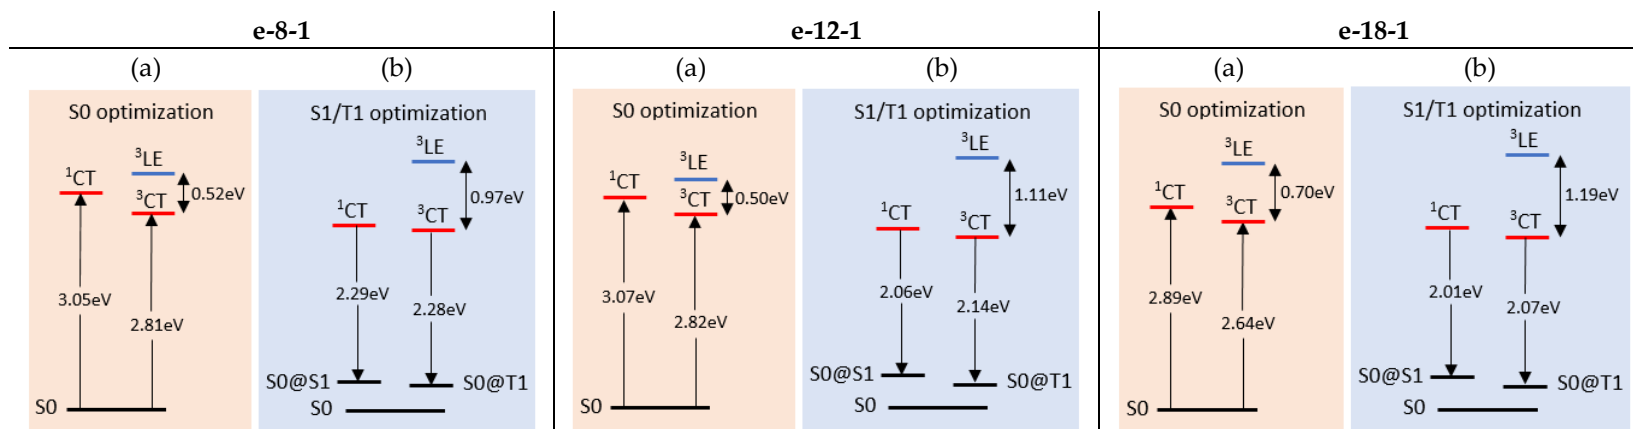

**Figure S2.** Schematic energy of **e-8-1**, **e-12-1**, and **e-18-1** complexes: (a) vertical excitation energies indicated by the upward arrows; (b) energy levels at optimized S1 and T1 geometries with fluorescence (left) and phosphorescence (right) indicated by the downward arrows.

**Table S1.** Calculated parameters for complexes modified at position **1**

|              | %Au in HOMO | %Au in LUMO | Overlap integral | Vertical excitations           |                                |                 |                                                   |                         |                     | Dipole moments (D) |       | Bond dissociation energy |      |           |      |
|--------------|-------------|-------------|------------------|--------------------------------|--------------------------------|-----------------|---------------------------------------------------|-------------------------|---------------------|--------------------|-------|--------------------------|------|-----------|------|
|              |             |             |                  | <sup>1</sup> CT - S1<br>E (eV) | <sup>3</sup> CT - T1<br>E (eV) | <sup>3</sup> LE |                                                   | $\Delta E_{ST}$<br>(eV) | Oscillator strength |                    |       | Au-N bond                |      | Au-C bond |      |
|              |             |             |                  |                                |                                | E (eV)          | Character                                         |                         |                     | S0                 | S1@S0 | kJ/mol                   | eV   | kJ/mol    | eV   |
| <b>a-1-1</b> | 2.9         | 13.9        | 0.36             | 3.03                           | 2.73                           | 3.34            | T2 ( <sup>3</sup> LE(A))                          | 0.30                    | 0.2073              | 11.7               | -2.5  | 367.4                    | 3.81 | 385.9     | 4.00 |
| <b>b-1-1</b> | 2.8         | 15.2        | 0.38             | 2.96                           | 2.64                           | 3.36            | T2 ( <sup>3</sup> LE(A))                          | 0.32                    | 0.2061              | 9.6                | -3.6  | 366.6                    | 3.80 | 391.4     | 4.06 |
| <b>c-1-1</b> | 3.0         | 13.9        | 0.35             | 3.22                           | 2.93                           | 3.33            | T2 ( <sup>3</sup> LE(A))                          | 0.29                    | 0.1900              | 10.7               | -4.8  | 372.8                    | 3.86 | 398.2     | 4.13 |
| <b>d-1-1</b> | 3.1         | 14.4        | 0.35             | 3.26                           | 2.98                           | 3.32            | T2 ( <sup>3</sup> LE(A))                          | 0.28                    | 0.1791              | 10.2               | -4.3  | 373.8                    | 3.87 | 403.4     | 4.18 |
| <b>e-1-1</b> | 2.8         | 12.9        | 0.36             | 3.11                           | 2.80                           | 3.35            | T2 ( <sup>3</sup> LE(A))                          | 0.31                    | 0.2005              | 10.8               | -2.7  | 376.7                    | 3.90 | 401.3     | 4.16 |
| <b>f-1-1</b> | 2.5         | 1.9         | 0.23             | 2.78                           | 2.54                           | 3.31            | T6 (mixed <sup>3</sup> CT and <sup>3</sup> LE(A)) | 0.24                    | 0.1331              | 9.0                | -7.6  | 357.4                    | 3.70 | 374.2     | 3.88 |
| <b>g-1-1</b> | 2.7         | 2.3         | 0.20             | 2.67                           | 2.53                           | 3.34            | T5 ( <sup>3</sup> LE(A))                          | 0.14                    | 0.0699              | 10.4               | -6.6  | 370.0                    | 3.83 | 374.4     | 3.88 |
| <b>h-1-1</b> | 2.9         | 14.5        | 0.35             | 3.07                           | 2.79                           | 3.33            | T2 ( <sup>3</sup> LE(A))                          | 0.28                    | 0.1820              | 11.4               | -2.7  | 371.4                    | 3.85 | 390.9     | 4.05 |
| <b>i-1-1</b> | 2.8         | 10.0        | 0.33             | 2.91                           | 2.61                           | 3.38            | T3 (mixed <sup>3</sup> CT and <sup>3</sup> LE(A)) | 0.30                    | 0.2037              | 12.2               | -3.9  | 364.1                    | 3.77 | 378.7     | 3.92 |
| <b>j-1-1</b> | 2.9         | 13.9        | 0.37             | 3.05                           | 2.74                           | 3.34            | T2 ( <sup>3</sup> LE(A))                          | 0.31                    | 0.2033              | 11.3               | -2.6  | 371.9                    | 3.85 | 395.3     | 4.10 |
| <b>k-1-1</b> | 2.7         | 12.3        | 0.36             | 2.99                           | 2.67                           | 3.35            | T2 ( <sup>3</sup> LE(A))                          | 0.32                    | 0.2146              | 11.2               | -2.6  | 364.5                    | 3.78 | 379.7     | 3.94 |
| <b>l-1-1</b> | 2.7         | 7.9         | 0.32             | 2.96                           | 2.65                           | 3.36            | T4 ( <sup>3</sup> LE(A))                          | 0.31                    | 0.1910              | 11.1               | -2.9  | 367.0                    | 3.80 | 384.5     | 3.99 |
| <b>m-1-1</b> | 2.7         | 2.2         | 0.21             | 2.48                           | 2.35                           | 3.36            | T6 ( <sup>3</sup> LE(A))                          | 0.13                    | 0.0661              | 10.9               | -8.9  | 364.8                    | 3.78 | 380.0     | 3.94 |
| <b>n-1-1</b> | 2.8         | 1.0         | 0.14             | 1.73                           | 1.68                           | 3.36            | T6 (mixed <sup>3</sup> CT and <sup>3</sup> LE(A)) | 0.05                    | 0.0219              | 12.6               | -14.3 | 355.6                    | 3.69 | 369.3     | 3.83 |
| <b>o-1-1</b> | 2.7         | 2.3         | 0.19             | 2.27                           | 2.17                           | 3.38            | T6 ( <sup>3</sup> LE(A))                          | 0.10                    | 0.0483              | 12.7               | -13.1 | 355.2                    | 3.68 | 368.5     | 3.82 |
| <b>p-1-1</b> | 3.4         | 4.5         | 0.23             | 2.89                           | 2.75                           | 3.11            | T2 (mixed <sup>3</sup> CT and <sup>3</sup> LE(A)) | 0.14                    | 0.0645              | 9.4                | -13.4 | 390.4                    | 4.05 | 412.5     | 4.28 |
| <b>q-1-1</b> | 3.1         | 5.8         | 0.26             | 2.81                           | 2.59                           | 3.22            | T3 (mixed <sup>3</sup> CT and <sup>3</sup> LE(A)) | 0.22                    | 0.1008              | 11.0               | -6.6  | 373.9                    | 3.87 | 390.9     | 4.05 |
| <b>r-1-1</b> | 2.8         | 8.0         | 0.31             | 2.76                           | 2.49                           | 3.38            | T5 ( <sup>3</sup> LE(A))                          | 0.27                    | 0.1539              | 11.8               | -5.8  | 361.4                    | 3.75 | 375.5     | 3.89 |
| <b>s-1-1</b> | 3.4         | 7.7         | 0.29             | 3.11                           | 2.89                           | 3.26            | T2 (mixed <sup>3</sup> CT and <sup>3</sup> LE(A)) | 0.22                    | 0.1095              | 8.8                | -9.5  | 398.0                    | 4.12 | 419.9     | 4.35 |
| <b>t-1-1</b> | 2.8         | 9.3         | 0.34             | 2.88                           | 2.57                           | 3.36            | T3 ( <sup>3</sup> LE(A))                          | 0.31                    | 0.1916              | 11.3               | -4.0  | 366.1                    | 3.79 | 385.6     | 4.00 |
| <b>u-1-1</b> | 3.0         | 16.1        | 0.35             | 3.17                           | 2.89                           | 3.34            | T2 ( <sup>3</sup> LE(A))                          | 0.28                    | 0.1916              | 11.8               | -2.9  | 362.9                    | 3.76 | 386.6     | 4.01 |
| <b>v-1-1</b> | 3.0         | 14.0        | 0.35             | 3.21                           | 2.92                           | 3.34            | T2 ( <sup>3</sup> LE(A))                          | 0.29                    | 0.1991              | 11.4               | -3.0  | 361.1                    | 3.74 | 387.3     | 4.01 |
| <b>w-1-1</b> | 3.0         | 16.1        | 0.35             | 3.13                           | 2.86                           | 3.34            | T2 ( <sup>3</sup> LE(A))                          | 0.27                    | 0.1841              | 11.6               | -2.9  | 362.6                    | 3.76 | 387.0     | 4.01 |

**Table S2.** Calculated parameters for complexes modified at position **2**

|       | %Au in HOMO | %Au in LUMO | Overlap integral | Vertical excitations           |                                |                 |                                                   |                         |                     | Dipole moments (D) |       | Bond dissociation energy |      |           |      |
|-------|-------------|-------------|------------------|--------------------------------|--------------------------------|-----------------|---------------------------------------------------|-------------------------|---------------------|--------------------|-------|--------------------------|------|-----------|------|
|       |             |             |                  | <sup>1</sup> CT - S1<br>E (eV) | <sup>3</sup> CT - T1<br>E (eV) | <sup>3</sup> LE |                                                   | $\Delta E_{ST}$<br>(eV) | Oscillator strength |                    |       | Au-N bond                |      | Au-C bond |      |
|       |             |             |                  |                                |                                | E (eV)          | Character                                         |                         |                     | S0                 | S1@S0 | kJ/mol                   | eV   | kJ/mol    | eV   |
| j-1-1 | 2.9         | 13.9        | 0.37             | 3.05                           | 2.74                           | 3.34            | T2 ( <sup>3</sup> LE(A))                          | 0.31                    | 0.2033              | 11.3               | -2.6  | 371.9                    | 3.85 | 395.3     | 4.10 |
| j-2-1 | 2.9         | 11.9        | 0.36             | 3.11                           | 2.81                           | 3.33            | T2 ( <sup>3</sup> LE(A))                          | 0.30                    | 0.1976              | 11.2               | -2.8  | 372.1                    | 3.86 | 397.4     | 4.12 |
| j-3-1 | 3.0         | 12.4        | 0.36             | 3.02                           | 2.71                           | 3.33            | T2 ( <sup>3</sup> LE(A))                          | 0.31                    | 0.1922              | 10.8               | -2.8  | 370.9                    | 3.84 | 389.8     | 4.04 |
| j-4-1 | 2.9         | 13.7        | 0.37             | 3.06                           | 2.76                           | 3.33            | T2 ( <sup>3</sup> LE(A))                          | 0.30                    | 0.2015              | 11.3               | -2.6  | 372.8                    | 3.86 | 396.8     | 4.11 |
| j-5-1 | 2.9         | 13.5        | 0.37             | 3.04                           | 2.73                           | 3.34            | T2 ( <sup>3</sup> LE(A))                          | 0.31                    | 0.2058              | 11.2               | -2.8  | 372.3                    | 3.86 | 395.8     | 4.10 |
| j-6-1 | 3.0         | 12.8        | 0.36             | 3.11                           | 2.81                           | 3.33            | T2 ( <sup>3</sup> LE(A))                          | 0.30                    | 0.1935              | 11.0               | -2.8  | 373.7                    | 3.87 | 401.1     | 4.16 |
| f-1-1 | 2.5         | 1.9         | 0.23             | 2.78                           | 2.54                           | 3.31            | T6 (mixed <sup>3</sup> CT and <sup>3</sup> LE(A)) | 0.24                    | 0.1331              | 9.0                | -7.6  | 357.4                    | 3.70 | 374.2     | 3.88 |
| f-2-1 | 2.6         | 2.8         | 0.23             | 2.78                           | 2.60                           | 3.36            | T5 (mixed <sup>3</sup> CT and <sup>3</sup> LE(A)) | 0.18                    | 0.1030              | 9.1                | -6.3  | 370.2                    | 3.84 | 389.0     | 4.03 |
| f-3-1 | 2.7         | 3.7         | 0.27             | 2.68                           | 2.47                           | 3.35            | T5 (mixed <sup>3</sup> CT and <sup>3</sup> LE(A)) | 0.21                    | 0.1228              | 8.7                | -6.1  | 362.7                    | 3.76 | 370.5     | 3.84 |
| f-4-1 | 2.6         | 1.7         | 0.22             | 2.79                           | 2.57                           | 3.31            | T5 (mixed <sup>3</sup> CT and <sup>3</sup> LE(A)) | 0.22                    | 0.1288              | 8.9                | -7.7  | 358.2                    | 3.71 | 376.0     | 3.90 |
| f-5-1 | 2.5         | 1.8         | 0.22             | 2.77                           | 2.54                           | 3.30            | T6 (mixed <sup>3</sup> CT and <sup>3</sup> LE(A)) | 0.23                    | 0.1330              | 8.8                | -7.8  | 357.5                    | 3.71 | 376.0     | 3.90 |
| f-6-1 | 3.0         | 3.6         | 0.25             | 2.80                           | 2.60                           | 3.33            | T3 (mixed <sup>3</sup> CT and <sup>3</sup> LE(A)) | 0.20                    | 0.1160              | 8.8                | -5.8  | 371.5                    | 3.85 | 396.9     | 4.11 |
| m-1-1 | 2.7         | 2.2         | 0.21             | 2.48                           | 2.35                           | 3.36            | T6 ( <sup>3</sup> LE(A))                          | 0.13                    | 0.0661              | 10.9               | -8.9  | 364.8                    | 3.78 | 380.0     | 3.94 |
| m-2-1 | 2.7         | 2.0         | 0.20             | 2.50                           | 2.38                           | 3.36            | T6 ( <sup>3</sup> LE(A))                          | 0.12                    | 0.0596              | 10.8               | -9.2  | 365.5                    | 3.79 | 382.6     | 3.97 |
| m-3-1 | 2.8         | 2.4         | 0.22             | 2.51                           | 2.36                           | 3.35            | T6 ( <sup>3</sup> (A))                            | 0.15                    | 0.0742              | 10.7               | -8.8  | 366.4                    | 3.80 | 377.2     | 3.91 |
| m-4-1 | 2.7         | 2.1         | 0.20             | 2.49                           | 2.36                           | 3.36            | T6 ( <sup>3</sup> LE(A))                          | 0.13                    | 0.0648              | 11.0               | -9.2  | 365.7                    | 3.79 | 382.1     | 3.96 |
| m-5-1 | 2.7         | 2.2         | 0.21             | 2.49                           | 2.35                           | 3.36            | T6 ( <sup>3</sup> LE(A))                          | 0.14                    | 0.0666              | 10.9               | -9.0  | 364.9                    | 3.78 | 380.7     | 3.95 |
| m-6-1 | 2.8         | 2.0         | 0.19             | 2.51                           | 2.38                           | 3.36            | T6 ( <sup>3</sup> LE(A))                          | 0.13                    | 0.0512              | 10.6               | -9.2  | 366.6                    | 3.80 | 389.6     | 4.04 |
| e-1-1 | 2.8         | 12.9        | 0.36             | 3.11                           | 2.80                           | 3.35            | T2 ( <sup>3</sup> LE(A))                          | 0.31                    | 0.2005              | 10.8               | -2.7  | 376.7                    | 3.90 | 401.3     | 4.16 |
| e-2-1 | 2.8         | 10.8        | 0.35             | 3.17                           | 2.88                           | 3.35            | T2 ( <sup>3</sup> LE(A))                          | 0.29                    | 0.1952              | 10.7               | -3.0  | 375.5                    | 3.89 | 403.2     | 4.18 |
| e-3-1 | 3.0         | 11.4        | 0.36             | 3.07                           | 2.77                           | 3.34            | T2 ( <sup>3</sup> LE(A))                          | 0.30                    | 0.1927              | 10.5               | -2.9  | 376.5                    | 3.90 | 394.9     | 4.09 |
| e-4-1 | 2.8         | 12.7        | 0.36             | 3.12                           | 2.82                           | 3.35            | T2 ( <sup>3</sup> LE(A))                          | 0.30                    | 0.1994              | 10.8               | -2.8  | 377.3                    | 3.91 | 403.1     | 4.18 |
| e-5-1 | 2.8         | 12.6        | 0.36             | 3.10                           | 2.79                           | 3.35            | T2 ( <sup>3</sup> LE(A))                          | 0.31                    | 0.2029              | 10.7               | -2.9  | 376.5                    | 3.90 | 401.8     | 4.16 |
| e-7-1 | 3.0         | 11.9        | 0.36             | 3.06                           | 2.76                           | 3.34            | T2 ( <sup>3</sup> LE(A))                          | 0.30                    | 0.1920              | 10.6               | -2.9  | 372.5                    | 3.86 | 395.8     | 4.10 |
| e-8-1 | 3.0         | 8.6         | 0.32             | 3.05                           | 2.81                           | 3.33            | T2 ( <sup>3</sup> LE(A))                          | 0.24                    | 0.1516              | 9.7                | -4.7  | 376.6                    | 3.90 | 397.2     | 4.12 |

|               |     |      |      |      |      |      |                                                      |      |        |      |      |       |      |       |      |
|---------------|-----|------|------|------|------|------|------------------------------------------------------|------|--------|------|------|-------|------|-------|------|
| <b>e-9-1</b>  | 2.7 | 10.4 | 0.36 | 3.08 | 2.81 | 3.33 | T2 ( <sup>3</sup> LE(A))                             | 0.27 | 0.1726 | 10.7 | -3.1 | 381.5 | 3.95 | 398.8 | 4.13 |
| <b>e-10-1</b> | 2.7 | 10.4 | 0.36 | 3.05 | 2.74 | 3.35 | T2 ( <sup>3</sup> LE(A))                             | 0.31 | 0.2068 | 10.7 | -3.1 | 371.3 | 3.85 | 395.2 | 4.10 |
| <b>e-11-1</b> | 3.0 | 7.6  | 0.32 | 3.15 | 2.89 | 3.32 | T2 ( <sup>3</sup> LE(A))                             | 0.26 | 0.1713 | 11.0 | -3.7 | 369.8 | 3.83 | 386.7 | 4.01 |
| <b>e-12-1</b> | 2.9 | 5.4  | 0.28 | 3.07 | 2.82 | 3.32 | T2 ( <sup>3</sup> LE(A))                             | 0.25 | 0.1659 | 10.8 | -5.0 | 370.3 | 3.84 | 384.9 | 3.99 |
| <b>e-13-1</b> | 3.1 | 8.4  | 0.32 | 3.15 | 2.90 | 3.33 | T2 ( <sup>3</sup> LE(A))                             | 0.25 | 0.1669 | 10.7 | -4.0 | 374.5 | 3.88 | 390.1 | 4.04 |
| <b>e-14-1</b> | 2.6 | 9.9  | 0.37 | 2.92 | 2.59 | 3.37 | T3 ( <sup>3</sup> LE(A))                             | 0.33 | 0.2199 | 10.1 | -5.6 | 368.0 | 3.81 | 385.9 | 4.00 |
| <b>e-15-1</b> | 3.0 | 6.7  | 0.32 | 3.01 | 2.75 | 3.33 | T2 ( <sup>3</sup> LE(A))                             | 0.26 | 0.1672 | 10.4 | -4.4 | 373.1 | 3.87 | 390.9 | 4.05 |
| <b>e-16-1</b> | 3.2 | 3.9  | 0.28 | 3.08 | 2.88 | 3.32 | T2 ( <sup>3</sup> LE(A))                             | 0.20 | 0.1233 | 10.3 | -5.0 | 377.2 | 3.91 | 376.1 | 3.90 |
| <b>e-17-1</b> | 3.9 | 8.4  | 0.28 | 3.36 | 3.14 | 3.31 | T2 ( <sup>3</sup> LE(A))                             | 0.22 | 0.1212 | 11.1 | -4.1 | 387.4 | 4.01 | 417.0 | 4.32 |
| <b>e-18-1</b> | 2.9 | 5.1  | 0.30 | 2.89 | 2.64 | 3.34 | T2 ( <sup>3</sup> LE(A))                             | 0.25 | 0.1567 | 10.2 | -5.6 | 371.7 | 3.85 | 374.8 | 3.88 |
| <b>e-19-1</b> | 2.9 | 1.8  | 0.21 | 2.58 | 2.44 | 3.33 | T4 (mixed <sup>3</sup> CT<br>and <sup>3</sup> LE(A)) | 0.14 | 0.0696 | 10.0 | -9.4 | 374.3 | 3.88 | 365.3 | 3.79 |
| <b>e-20-1</b> | 2.9 | 4.9  | 0.31 | 2.64 | 2.38 | 3.30 | T4 (mixed <sup>3</sup> CT<br>and <sup>3</sup> LE(A)) | 0.26 | 0.1514 | 10.7 | -8.0 | 363.9 | 3.77 | 372.6 | 3.86 |

**Table S3.** Calculated parameters for complexes modified at position **3**

|               | %Au in HOMO | %Au in LUMO | Overlap integral | Vertical excitations           |                                |                 |                          |                         |                     | Dipole moments (D) |       | Bond dissociation energy |      |           |      |
|---------------|-------------|-------------|------------------|--------------------------------|--------------------------------|-----------------|--------------------------|-------------------------|---------------------|--------------------|-------|--------------------------|------|-----------|------|
|               |             |             |                  | <sup>1</sup> CT - S1<br>E (eV) | <sup>3</sup> CT - T1<br>E (eV) | <sup>3</sup> LE |                          | $\Delta E_{ST}$<br>(eV) | Oscillator strength |                    |       | Au-N bond                |      | Au-C bond |      |
|               |             |             |                  |                                |                                | E (eV)          | Character                |                         |                     | S0                 | S1@S0 | kJ/mol                   | eV   | kJ/mol    | eV   |
| <b>e-1-0</b>  | 2.8         | 13.5        | 0.37             | 3.03                           | 2.71                           | 3.35            | T2 ( <sup>3</sup> LE(A)) | 0.32                    | 0.1994              | 10.6               | -2.6  | 369.4                    | 3.83 | 392.1     | 4.06 |
| <b>e-1-1</b>  | 2.8         | 12.9        | 0.36             | 3.11                           | 2.80                           | 3.35            | T2 ( <sup>3</sup> LE(A)) | 0.31                    | 0.2005              | 10.8               | -2.7  | 376.7                    | 3.90 | 401.3     | 4.16 |
| <b>e-1-2</b>  | 2.8         | 12.9        | 0.36             | 3.11                           | 2.80                           | 3.35            | T2 ( <sup>3</sup> LE(A)) | 0.31                    | 0.2037              | 11.0               | -2.7  | 374.8                    | 3.88 | 402.8     | 4.18 |
| <b>e-1-3</b>  | 2.7         | 12.0        | 0.36             | 3.08                           | 2.77                           | 3.34            | T2 ( <sup>3</sup> LE(A)) | 0.31                    | 0.2176              | 11.5               | -2.6  | 372.9                    | 3.87 | 393.7     | 4.08 |
| <b>e-1-4</b>  | 2.8         | 13.0        | 0.36             | 3.12                           | 2.82                           | 3.35            | T2 ( <sup>3</sup> LE(A)) | 0.30                    | 0.2078              | 11.3               | -2.5  | 377.3                    | 3.91 | 402.7     | 4.17 |
| <b>e-1-7</b>  | 2.8         | 12.3        | 0.36             | 3.06                           | 2.75                           | 3.35            | T2 ( <sup>3</sup> LE(A)) | 0.31                    | 0.2176              | 11.2               | -2.6  | 372.9                    | 3.86 | 395.1     | 4.09 |
| <b>e-1-8</b>  | 2.8         | 10.2        | 0.34             | 3.08                           | 2.80                           | 3.35            | T2 ( <sup>3</sup> LE(A)) | 0.28                    | 0.2182              | 11.5               | -3.7  | 375.0                    | 3.89 | 393.2     | 4.08 |
| <b>e-1-15</b> | 2.7         | 10.5        | 0.35             | 2.98                           | 2.68                           | 3.35            | T2 ( <sup>3</sup> LE(A)) | 0.30                    | 0.2218              | 11.3               | -3.2  | 371.9                    | 3.85 | 386.7     | 4.01 |

## X-Ray Crystallography

Crystals suitable for X-ray diffraction study were obtained by slow layer diffusion of hexanes/petroleum ether into dichloromethane solution for **e-2-1** at room temperature. Crystals were mounted in oil on glass fiber and fixed on the diffractometer in a cold nitrogen stream. Data were collected using XtaLAB AFC11 (RINC): quarter-chi single diffractometer at 100 K. Data were processed using the CrystAlisPro-CCD and –RED software. Multi-scan absorption correction was applied for all crystals. For the final refinement, the contribution of severely disordered CH<sub>2</sub>Cl<sub>2</sub> molecules in the crystals **e-2-1** was accounted for by applying a solvent void mask calculated using BYPASS, implemented through Olex2. Structures were solved by direct method/intrinsic phasing and refined by the full-matrix least-squares against F<sup>2</sup> in an anisotropic (for non-hydrogen atoms) approximation. All hydrogen atoms were positioned geometrically and constrained to ride on their parent atoms with C-H = 0.95-1.00 Å, and U<sub>iso</sub> = 1.2-1.5 U<sub>eq</sub> (parent atom). All calculations were performed using the SHELXL software and Olex2 graphical user interface.

**e-2-1**, CCDC number 2259783, C<sub>35</sub>H<sub>47</sub>AuN<sub>2</sub> (*M* = 676.67 g/mol): monoclinic, space group P2<sub>1</sub>/c (no. 14), *a* = 9.71163(5) Å, *b* = 18.40218(10) Å, *c* = 17.11055(10) Å, β = 95.3962(5)°, *V* = 3044.36(3) Å<sup>3</sup>, *Z* = 4, *T* = 100.00(10) K, μ(Cu Kα) = 9.241 mm<sup>-1</sup>, *D*<sub>calc</sub> = 1.476 g/cm<sup>3</sup>, 20350 reflections measured (7.072° ≤ 2θ ≤ 151.65°), 6090 unique (*R*<sub>int</sub> = 0.0181, *R*<sub>sigma</sub> = 0.0150) which were used in all calculations. The final *R*<sub>1</sub> was 0.0207 (*I* > 2σ(*I*)) and *wR*<sub>2</sub> was 0.0564 (all data).

## Experimental Details

**General Considerations.** Unless stated otherwise, all reactions were carried out in air. Solvents were distilled and dried as required. Potassium *tert*-butoxide and carbazole were purchased from FluoroChem. The carbene complex (E<sup>t</sup>L)AuCl [1] were obtained according to literature procedures. <sup>1</sup>H and <sup>13</sup>C{<sup>1</sup>H} NMR spectra were recorded using a Bruker Avance 500 MHz NMR spectrometer. <sup>1</sup>H NMR spectra were referenced to CD<sub>2</sub>Cl<sub>2</sub> at δ 5.32 (<sup>13</sup>C, δ 53.84) ppm. All electrochemical experiments were performed using an Autolab PGSTAT 302N computer-controlled potentiostat. Cyclic voltammetry (CV) was performed using a three-electrode configuration consisting of either a glassy carbon macrodisk working electrode (GCE) (diameter of 3 mm; BASi, Indiana, USA) combined with a Pt wire counter electrode (99.99 %; GoodFellow, Cambridge, UK) and an Ag wire pseudo-reference electrode (99.99 %; GoodFellow, Cambridge, UK). The GCE was polished between experiments using alumina slurry (0.3 μm), rinsed in distilled water and subjected to brief sonication to remove any adhering alumina microparticles. The metal electrodes were then dried in an oven at 100 °C to remove residual traces of water, the GCE was left to air dry and residual traces of water were removed under vacuum. The Ag wire pseudoreference electrodes were calibrated to the ferrocene/ferrocenium couple in THF at the end of each run to allow for any drift in potential, following IUPAC recommendations [2]. All electrochemical measurements were performed at ambient temperatures under an inert Ar atmosphere in THF containing complex under study (0.14 mM) and supporting electrolyte [n-Bu<sub>4</sub>N][PF<sub>6</sub>] (0.13 mM). Data were recorded with Autolab NOVA software (v. 1.11). Elemental analyses were performed by the University of Manchester. UV-visible absorption spectra were recorded using a Perkin-Elmer Lambda 35 UV/vis spectrometer. Mass spectrometry data was obtained using APCI(ASAP) (Atmospheric Solids Analysis Probe) at the University of Manchester.

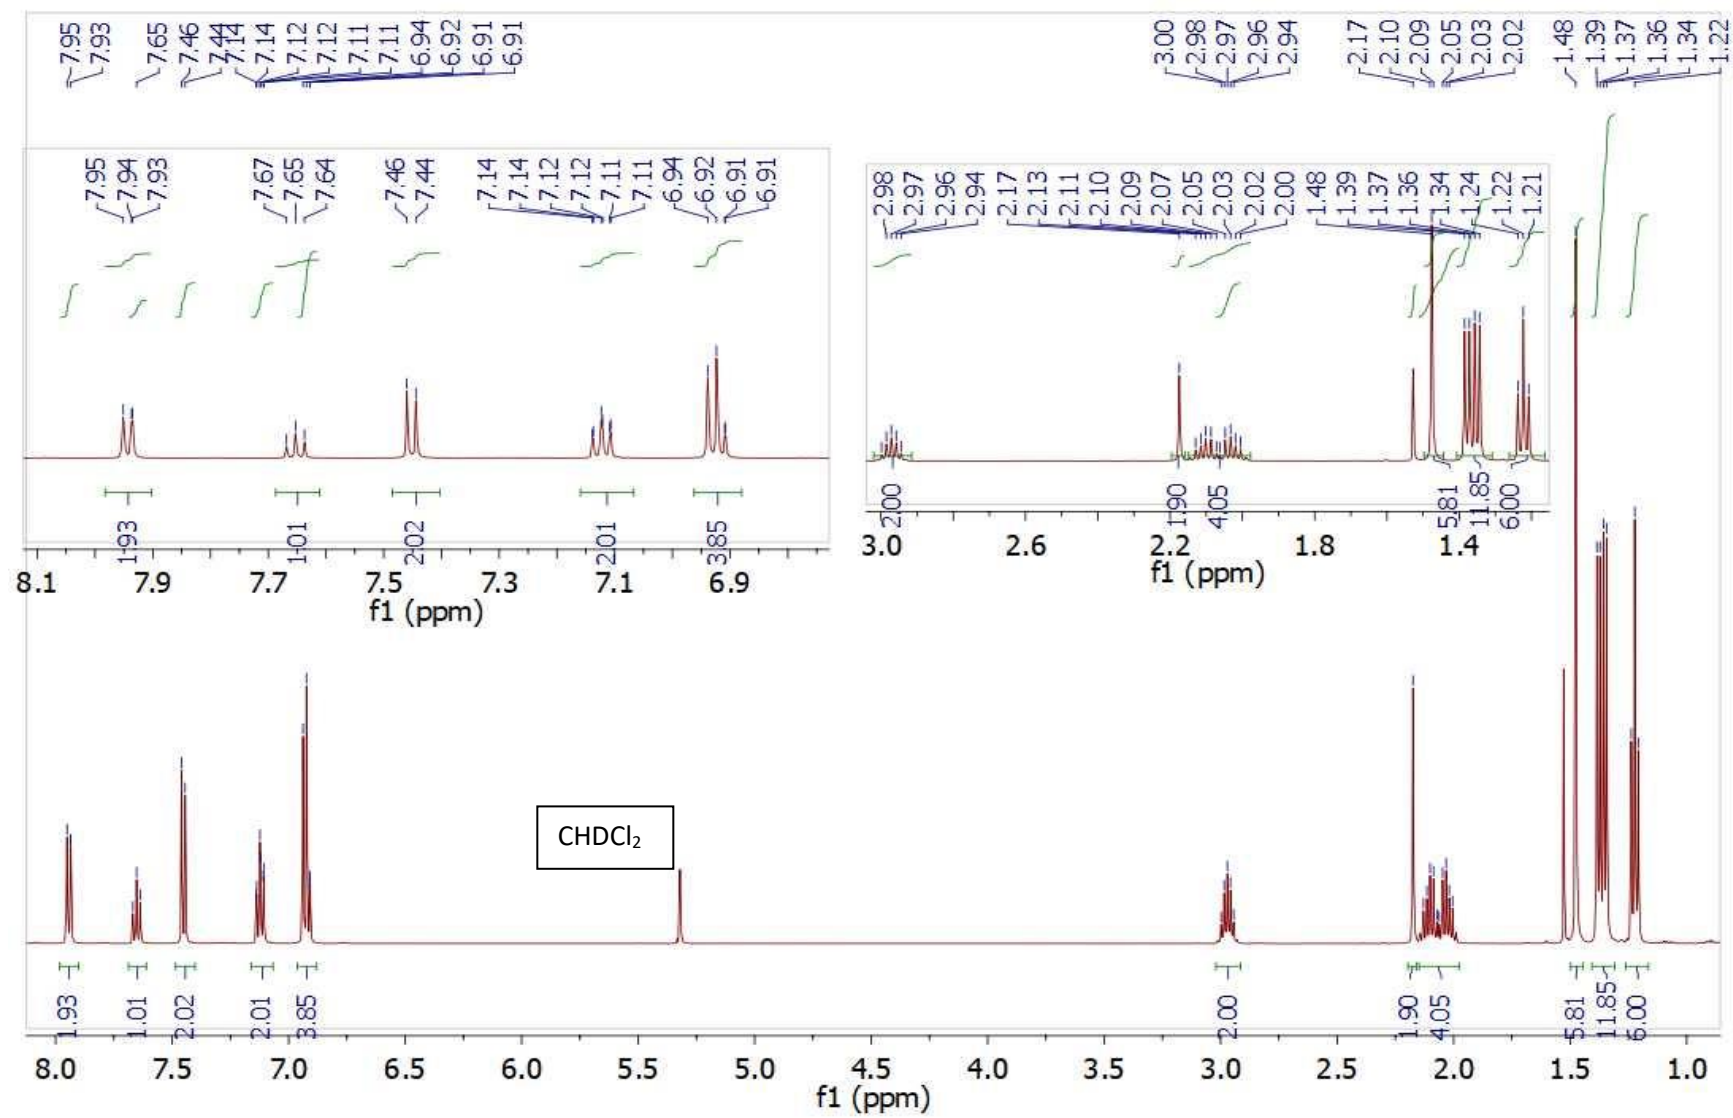

Figure S3. <sup>1</sup>H NMR (500 MHz, CD<sub>2</sub>Cl<sub>2</sub>) for e-2-1

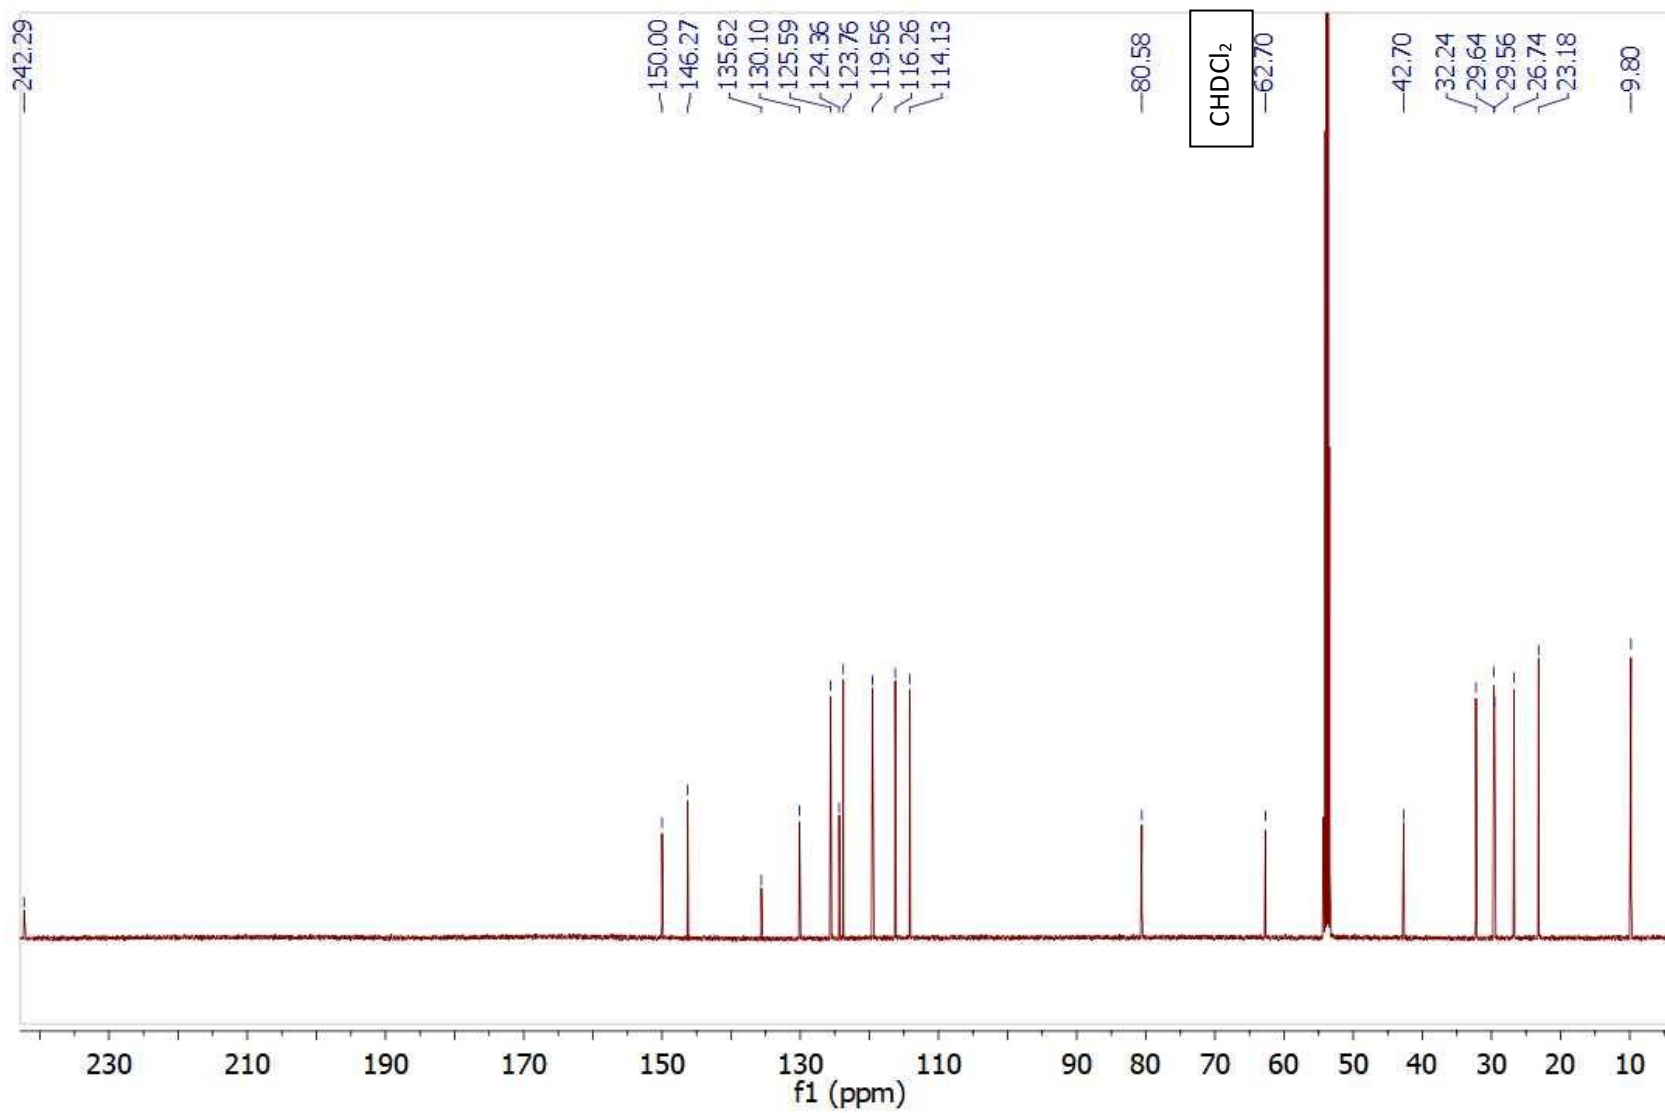

Figure S4. <sup>13</sup>C NMR (125 MHz, CD<sub>2</sub>Cl<sub>2</sub>) for e-2-1

**Table S4.** UV-vis data for **e-2-1** in various solvents

|              | $\lambda_{\text{abs}}$ [nm], ( $10^3 \epsilon/\text{M}^{-1} \text{cm}^{-1}$ ) |            |            |           |
|--------------|-------------------------------------------------------------------------------|------------|------------|-----------|
|              | DCM                                                                           | THF        | Toluene    | MCH       |
| <b>e-2-1</b> | 387 (sh) (4.4)                                                                | 379 (8.0)  | 392 (8.2)  | 408 (8.4) |
|              | 367 (11.3)                                                                    | 367 (12.5) | 367 (10.1) | 365 (7.3) |

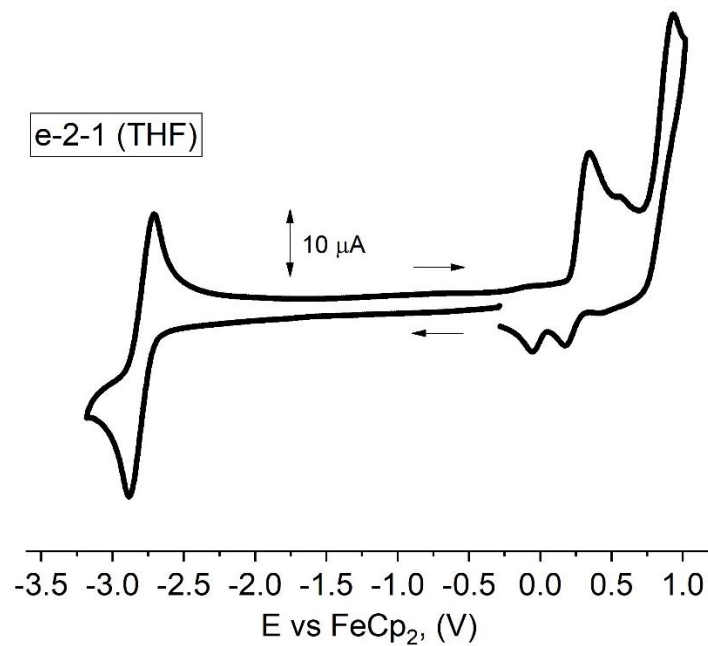

**Figure S5.** Full range cyclic voltammogram for **e-2-1**. Recorded using a glassy carbon electrode in THF solution (1.4 mM) with [n-Bu<sub>4</sub>N]PF<sub>6</sub> as supporting electrolyte (0.13 M), scan rate 0.1 Vs<sup>-1</sup>.

**Table S5.** Formal electrode potentials (peak position  $E_p$  for irreversible and  $E_{1/2}$  for quasi-reversible processes (\*),  $V$ , *vs.* FeCp<sub>2</sub>), onset potentials ( $E$ ,  $V$ , *vs.* FeCp<sub>2</sub>), peak-to-peak separation in parentheses for quasi-reversible processes ( $\Delta E_p$  in mV),  $E_{HOMO}/E_{LUMO}$  (eV) and band gap values ( $\Delta E$ , eV) for the redox changes exhibited.<sup>a</sup>

|              | Reduction      |                  | $E_{LUMO}$<br>(eV) | Oxidation     |                 |               |           | $E_{HOMO}$<br>(eV) | $\Delta E$<br>(eV) |
|--------------|----------------|------------------|--------------------|---------------|-----------------|---------------|-----------|--------------------|--------------------|
|              | $E_{1st}$      | $E_{onset\ red}$ |                    | $E_{1st}$     | $E_{onset\ ox}$ | $E_{2nd}$     | $E_{3rd}$ |                    |                    |
| <b>e-2-1</b> | -2.79<br>(176) | -2.72            | -2.67              | 0.15<br>(397) | 0.22            | 0.37<br>(384) | 0.93      | -5.61              | 2.94               |

<sup>a</sup> In tetrahydrofuran solution, recorded using a glassy carbon electrode, concentration 1.4 mM, supporting electrolyte [<sup>n</sup>Bu<sub>4</sub>N][PF<sub>6</sub>] (0.13 M), measured at 0.1 Vs<sup>-1</sup>.

<sup>b</sup> In difluorobenzene solution, recorded using a glassy carbon electrode, concentration 1.4 mM, supporting electrolyte [<sup>n</sup>Bu<sub>4</sub>N][PF<sub>6</sub>] (0.13 M), measured at 0.1 Vs<sup>-1</sup>.  $E_{HOMO} = -(E_{onset\ ox\ Fc/Fc^+} + 5.39)$  eV;  $E_{LUMO} = -(E_{onset\ red\ Fc/Fc^+} + 5.39)$  eV [3].

### Photophysical Characterization

UV-visible absorption spectra were recorded using a Varian Cary 5000 UV-Vis-NIR spectrometer. Photoluminescence measurements were recorded on an Edinburgh Instruments FLS980 spectrometer with a solids mount attachment where appropriate. Absolute photoluminescence quantum yields were recorded using a Hamamatsu Quantaurus-QY C11347-11. Quantum yields have been measured in air for solid samples and under nitrogen for solutions. Time resolved luminescence data were collected on a time-correlated single photon counting (TCSPC) Edinburgh Instruments FLS980 spectrometer using F-900 software. A xenon flash lamp and EPL pulsed diode lasers were used as excitation sources. The collected data were analyzed using F-900 software.

## References

1. Romanov, A.S.; Becker, C.R.; James, C.E.; Di, D.; Credgington, D.; Linnolahti, M.; Bochmann, M. Copper and Gold Cyclic (Alkyl)(amino)carbene Complexes with Sub-Microsecond Photoemissions: Structure and Substituent Effects on Redox and Luminescent Properties. *Chem. Eur. J.*, **2017**, *23*, 4625–4637.
2. Gritzner, G.; Kůta, J. Recommendations on reporting electrode potentials in nonaqueous solvents: IUPC commission on electrochemistry. *Electrochim. Acta.*, **1984**, *29*, 869–873.
3. Cardona, C.M.; Li, W.; Kaifer, A.E.; Stockdale, D.; Bazan, G.C. Electrochemical Considerations for Determining Absolute Frontier Orbital Energy Levels of Conjugated Polymers for Solar Cell Applications. *Adv. Mater.*, **2011**, *23*, 2367-2371.
