# Supplementary material for: Tailoring Carbene-Metal-Amides for Thermally Activated Delayed Fluorescence: A Computationally Guided Study on the Effect of Cyclic (Alkyl)(amino)carbenes
Source: Preprints.org preprint supplement (doi:10.20944/preprints202305.0227.v1), 2023-05-04
Supplement: Supplementary file 2 [file supplementary]

Archive with 4 entries (4 files):
- checkcif_e21.pdf
- Coordinates of optimized geometries.xyz
- EtCAACAuCz.cif
- Supplementary Materials_Le_Phuoc.pdf
