# Supplementary material for: Tailoring Carbene-Metal-Amides for Thermally Activated Delayed Fluorescence: A Computationally Guided Study on the Effect of Cyclic (Alkyl)(amino)carbenes
Source: Preprints.org preprint supplement (doi:10.20944/preprints202305.0227.v1), 2023-05-04
Supplement: Supplementary file 2 [file supplementary › Coordinates of optimized geometries.xyz]

56
a-1-1
 Au                -0.02661400   -0.61993800   -0.07452500
 N                 -1.98046200   -0.20384200   -0.05935200
 C                 -4.27500500   -0.31421500    0.03955300
 C                  2.06245200    1.95972800    1.25555300
 N                  2.79966300    0.05385200   -0.06958700
 C                  4.23441200   -0.35346500   -0.00916100
 C                  1.65735300    3.28433300    1.34654800
 H                  1.37056600    3.69387900    2.30594700
 C                 -4.30423700   -3.08933000    0.09946400
 H                 -4.33587700   -4.17220700    0.12315500
 C                  1.92175300   -0.91806600   -0.08267200
 C                 -2.47960200    1.08233600   -0.06651700
 C                  2.34101800    2.21068600   -1.13125300
 C                  1.59808900    4.07311500    0.20329200
 C                 -3.06647900   -1.05042800    0.00404800
 C                  2.40864700    1.43458900    0.01702500
 C                 -4.59221800    2.28258300    0.00093000
 H                 -5.67570300    2.28823800    0.04799100
 C                 -1.77042300    2.28404200   -0.12639400
 H                 -0.68550900    2.27736300   -0.18244800
 C                 -3.89206900    1.07603300   -0.00529200
 C                 -3.08090900   -2.44621300    0.03435000
 H                 -2.14971300   -3.00298700    0.00626700
 C                  4.11980700   -1.86016500   -0.27950500
 H                  4.79996500   -2.42995400    0.35627800
 H                  4.38734400   -2.06203700   -1.31998300
 C                 -5.49685300   -0.98335000    0.10527800
 H                 -6.42674500   -0.42591600    0.13266000
 C                 -2.48489300    3.46883700   -0.11742600
 H                 -1.95068100    4.41174600   -0.16378800
 C                  1.93367600    3.53549800   -1.03343700
 H                  1.86415500    4.14212500   -1.92671000
 C                 -5.50712300   -2.36769300    0.13495300
 H                 -6.44802800   -2.90125800    0.18565900
 C                  4.79197100   -0.02738300    1.37141100
 H                  4.76171300    1.04839700    1.55551200
 H                  5.83143300   -0.35389100    1.42803700
 H                  4.22709700   -0.53191000    2.15664100
 C                 -3.88695800    3.47375700   -0.05347200
 H                 -4.41833400    4.41732500   -0.04911800
 C                  5.04254600    0.36673400   -1.07698100
 H                  4.61503200    0.19895600   -2.06723700
 H                  6.06225900   -0.02185200   -1.07246400
 H                  5.08535800    1.44057200   -0.88601100
 C                  2.64657700   -2.23877200   -0.04363600
 C                  2.40354300   -2.84680900    1.34214600
 H                  1.33697100   -3.02165800    1.49434000
 H                  2.93143300   -3.80019300    1.41652600
 H                  2.75621300   -2.19262800    2.14174700
 C                  2.10493200   -3.18519400   -1.10950800
 H                  2.66276000   -4.12436200   -1.08867000
 H                  1.05026800   -3.39935400   -0.92530200
 H                  2.19467900   -2.74998300   -2.10662500
 H                  2.08791100    1.31754700    2.12809800
 H                  1.27123500    5.10247100    0.27398000
 H                  2.58223300    1.76947800   -2.09022200
60
b-1-1
 Au                -0.16753900   -0.71498500   -0.04359200
 N                 -2.09996300   -0.21758400   -0.02712100
 C                 -4.39848000   -0.22055000    0.00791000
 C                  2.02117600    1.88132900    1.22848400
 N                  2.65563700   -0.10284500   -0.06589300
 C                  4.09336200   -0.52732700   -0.04977600
 C                  1.74960200    3.25007100    1.26878500
 H                  1.56430700    3.72556100    2.22399000
 C                 -4.56160200   -2.99153100   -0.02941700
 H                 -4.64535600   -4.07174500   -0.04407900
 C                  1.77272800   -1.06937800   -0.05746100
 C                 -2.53740600    1.09239300   -0.00215300
 C                  2.08750700    1.98983700   -1.20862000
 C                 -3.22634300   -1.01312100   -0.02135700
 C                  2.27919700    1.28477000   -0.01330900
 C                 -4.59263100    2.38836700    0.04920700
 H                 -5.67555200    2.44385800    0.06711600
 C                 -1.77044800    2.25962400    0.00157100
 H                 -0.68512300    2.20829000   -0.01873100
 C                 -3.94922300    1.15076800    0.02083500
 C                 -3.30762100   -2.40658800   -0.04020200
 H                 -2.40366600   -3.00678000   -0.06321100
 C                  3.95095500   -2.03772200   -0.28715500
 H                  4.64582900   -2.60442200    0.33532700
 H                  4.17828200   -2.26320200   -1.33244300
 C                 -5.65206400   -0.83132500    0.01837000
 H                 -6.55473800   -0.23067800    0.04083400
 C                 -2.42931600    3.47591600    0.03051900
 H                 -1.84890600    4.39212800    0.03408200
 C                  1.81289600    3.35654500   -1.14437500
 H                  1.67808400    3.91461100   -2.06265200
 C                 -5.72900700   -2.21386700   -0.00027700
 H                 -6.69527900   -2.70249600    0.00745600
 C                  4.72307100   -0.18214300    1.29414500
 H                  4.67569200    0.89291400    1.47490100
 H                  5.77087700   -0.48670400    1.27715900
 H                  4.22505800   -0.68715900    2.12087400
 C                 -3.83097800    3.54542500    0.05442100
 H                 -4.31759300    4.51259900    0.07653800
 C                  4.86972600    0.16658500   -1.15782600
 H                  4.44918500   -0.05377500   -2.13789800
 H                  5.90365700   -0.18171500   -1.12911800
 H                  4.86655900    1.24920300   -1.01570600
 C                  2.48337600   -2.39533300    0.00714200
 C                  2.27781700   -2.93530300    1.42742800
 H                  1.21468800   -3.08780400    1.62379000
 H                  2.79515400   -3.89158000    1.53134800
 H                  2.67112700   -2.24994700    2.18189900
 C                  1.89964600   -3.38090000   -0.99791600
 H                  2.44583200   -4.32585600   -0.95269400
 H                  0.84781600   -3.57275700   -0.77556400
 H                  1.96735000   -2.99218000   -2.01624600
 N                  2.04779900    1.11933300    2.38971300
 H                  1.70319400    0.17138500    2.27806600
 H                  1.62419200    1.57558200    3.18646100
 N                  2.17901100    1.32951000   -2.42668300
 H                  1.79319200    1.84656000   -3.20497300
 H                  1.85014000    0.37069000   -2.41188800
 C                  1.67404000    3.97308100    0.08913600
 H                  1.45432300    5.03260800    0.13034200
58
c-1-1
 Au                -0.16255800   -0.67805100   -0.08318600
 N                 -2.10850500   -0.20929500   -0.06293800
 C                 -4.40623100   -0.26826300    0.01722000
 C                  2.01455100    1.82067400    1.26010600
 N                  2.69003600   -0.10650900   -0.07684300
 C                  4.11089000   -0.56691900   -0.03166900
 C                  1.61787000    3.14954200    1.36211700
 H                  1.37045300    3.56268300    2.33256000
 C                 -4.49926600   -3.04249200    0.00873900
 H                 -4.55593400   -4.12461800    0.00548100
 C                  1.77538100   -1.04280700   -0.08569600
 C                 -2.57770100    1.08635000   -0.04152800
 C                  2.19105600    2.05162800   -1.13447500
 C                 -3.21412200   -1.03102800   -0.02771800
 C                  2.33672300    1.27560300    0.01539100
 C                 -4.66127900    2.33610700    0.04027700
 H                 -5.74469000    2.36724700    0.07933500
 C                 -1.83986100    2.27197200   -0.06460100
 H                 -0.75520900    2.23839200   -0.10989100
 C                 -3.99090200    1.11297900    0.00924100
 C                 -3.26111100   -2.42677500   -0.03195000
 H                 -2.34266900   -3.00391900   -0.06734500
 C                  3.93225000   -2.07281200   -0.26992800
 H                  4.59642600   -2.65690600    0.36988900
 H                  4.17597100   -2.30665800   -1.30938200
 C                 -5.64373600   -0.91051400    0.05777200
 H                 -6.56086700   -0.33260700    0.09210400
 C                 -2.52500000    3.47350800   -0.03163000
 H                 -1.96753700    4.40414200   -0.04927200
 C                  1.79485500    3.38170700   -1.03452500
 H                  1.68631800    3.97683500   -1.93352400
 C                 -5.68588000   -2.29438600    0.05340000
 H                 -6.63905800   -2.80731300    0.08424800
 C                  4.71941200   -0.23757700    1.32593100
 H                  4.71145800    0.84092700    1.49815000
 H                  5.75581500   -0.57881600    1.34019500
 H                  4.17627800   -0.71776300    2.13825800
 C                 -3.92729600    3.51107700    0.02094200
 H                 -4.43601600    4.46680200    0.04477900
 C                  4.92197900    0.10271700   -1.12955100
 H                  4.49495600   -0.10052000   -2.11042100
 H                  5.94268300   -0.28237900   -1.09757200
 H                  4.96089000    1.18454700   -0.98138700
 C                  2.44896600   -2.38680600   -0.00753100
 C                  2.19641100   -2.90627200    1.41358200
 H                  1.12785100   -3.06440400    1.57075300
 H                  2.71842900   -3.85613900    1.55003700
 H                  2.54531100   -2.19921700    2.16868000
 C                  1.86302900   -3.36434300   -1.01860500
 H                  2.38163900   -4.32361300   -0.95067800
 H                  0.80163700   -3.52558700   -0.81832400
 H                  1.96432500   -2.98575000   -2.03732400
 C                  1.51786600    3.91901100    0.21310600
 H                  1.19839100    4.95023900    0.28946400
 O                  2.42253500    1.44839800   -2.32224000
 H                  2.15648800    2.02769200   -3.04702200
 O                  2.08808600    0.99704300    2.33102800
 H                  1.66990800    1.40856700    3.09757200
64
d-1-1
 Au                -0.26373000   -0.74333000   -0.28800600
 N                 -2.18706900   -0.18298000   -0.31705200
 C                 -4.47428300   -0.13940300   -0.07551200
 C                  1.69549300    1.53284200    1.37597600
 N                  2.59475500   -0.31448300    0.07025100
 C                  3.95183000   -0.85939700    0.38163000
 C                  1.35235000    2.87660700    1.50807500
 H                  0.88247700    3.23205500    2.41405800
 C                 -4.71271100   -2.89750100   -0.27554900
 H                 -4.82620400   -3.97236400   -0.35283700
 C                  1.64985700   -1.19949500   -0.11742500
 C                 -2.58572400    1.12807600   -0.16701900
 C                  2.47986600    1.94959400   -0.88010100
 C                  1.58990500    3.73902800    0.45086200
 C                 -3.32957000   -0.95198600   -0.26064800
 C                  2.29520100    1.07825000    0.19794600
 C                 -4.58904700    2.46368900    0.16885200
 H                 -5.66375900    2.54276500    0.29123900
 C                 -1.79002500    2.27636600   -0.16170100
 H                 -0.71708900    2.19885900   -0.31243100
 C                 -3.98865200    1.21707100   -0.00924500
 C                 -3.44953000   -2.33985000   -0.36021200
 H                 -2.56718100   -2.95517700   -0.50369200
 C                  3.75252200   -2.34002200    0.03429400
 H                  4.26193600   -2.98714200    0.75076200
 H                  4.17135200   -2.53946000   -0.95550300
 C                 -5.73827800   -0.72351200    0.00698000
 H                 -6.61945800   -0.10711300    0.14777500
 C                 -2.40612300    3.50176800    0.02318500
 H                 -1.80303300    4.40353900    0.02960100
 C                  2.13714900    3.29401500   -0.74549800
 H                  2.27686600    3.98376600   -1.56470900
 C                 -5.85292100   -2.09952600   -0.09352600
 H                 -6.82740600   -2.56772600   -0.03250300
 C                  4.26509700   -0.62184900    1.85463300
 H                  4.26615600    0.44735000    2.07757100
 H                  5.25743200   -1.01922700    2.07412000
 H                  3.53695400   -1.10374000    2.50452000
 C                 -3.79639300    3.60007300    0.18960400
 H                 -4.25048800    4.57332900    0.32847300
 C                  5.01894200   -0.19974400   -0.47576900
 H                  4.81126800   -0.33837100   -1.53546000
 H                  5.98454900   -0.65039200   -0.23930300
 H                  5.08141200    0.87055700   -0.26633100
 C                  2.23346300   -2.58193700    0.00709600
 C                  1.69796400   -3.15889900    1.32400700
 H                  0.61476900   -3.28249300    1.26556900
 H                  2.15558800   -4.13403300    1.50590600
 H                  1.91452200   -2.50339500    2.16978800
 C                  1.79721700   -3.47306700   -1.14966000
 H                  2.24047400   -4.46578900   -1.04106400
 H                  0.70993000   -3.57458700   -1.15932900
 H                  2.11055000   -3.05623000   -2.10859300
 H                  1.31934700    4.78272400    0.54887500
 O                  1.45362000    0.60918700    2.32963100
 O                  2.95416600    1.40081900   -2.01638500
 C                  0.30121300    0.80949600    3.13557200
 H                 -0.54671200    1.11361200    2.51414700
 H                  0.08255200   -0.14635600    3.60491300
 H                  0.48312800    1.55869200    3.90928500
 C                  3.03068800    2.21633100   -3.16585600
 H                  3.37511300    1.57799100   -3.97455700
 H                  2.04987500    2.62611100   -3.41895000
 H                  3.74065300    3.03538200   -3.02314200
74
e-1-1
 Au                -0.39371800   -0.88896000   -0.04159300
 N                 -2.28825700   -0.24781800   -0.02118100
 C                 -4.57717000   -0.03395800   -0.00517000
 C                  1.97420800    1.59881500    1.27429900
 N                  2.45334700   -0.41214700   -0.05946800
 C                  3.86652200   -0.91234100   -0.08232500
 C                  1.78469400    2.97926500    1.31352100
 H                  1.64418300    3.46199900    2.27342900
 C                 -4.99894300   -2.77663100   -0.08302400
 H                 -5.18369600   -3.84388900   -0.11357600
 C                  1.52529200   -1.33362100   -0.06723300
 C                 -2.60045600    1.09640700    0.01795600
 C                  0.39824500    0.94516500    3.08185700
 H                 -0.32910000    0.62368900    2.33366600
 H                  0.17582700    1.98401000    3.33785200
 H                  0.26417700    0.33907000    3.97996600
 C                  2.00497000    1.72636600   -1.17414000
 C                  1.73262100    3.73299100    0.15288900
 H                  1.58484400    4.80420000    0.20677700
 C                 -3.48432600   -0.93302900   -0.03596000
 C                  2.15085200    1.00001000    0.01706700
 C                  0.47678300    1.21074400   -3.06233900
 H                 -0.24477700    0.77069100   -2.37039800
 H                  0.37784200    0.71568800   -4.03039700
 H                  0.21527700    2.26410800   -3.19037600
 C                 -4.52375100    2.58121900    0.06936000
 H                 -5.59660700    2.73942700    0.07899800
 C                 -1.72641400    2.18673600    0.04368300
 H                 -0.65063900    2.03290200    0.03265700
 C                  1.83660600    0.81985200    2.56845600
 H                  2.02257500   -0.23712400    2.36258600
 C                  1.91131400    1.07903100   -2.54159600
 H                  2.12891400    0.01243800   -2.44087900
 C                 -4.00112400    1.28857800    0.03014400
 C                 -3.69558700   -2.31230300   -0.07514800
 H                 -2.85155500   -2.99378000   -0.09918300
 C                  3.64569200   -2.40496900   -0.36415300
 H                  4.31878600   -3.02546600    0.23048600
 H                  3.84879900   -2.60756200   -1.41915600
 C                 -5.88276900   -0.52442300   -0.01359000
 H                 -6.72537200    0.15792900    0.00989900
 C                  2.80172400    1.29244700    3.65477300
 H                  3.84431100    1.25477400    3.33803100
 H                  2.69099100    0.67336700    4.54704500
 H                  2.57723700    2.32160800    3.94361600
 C                 -2.26738700    3.46015900    0.08276300
 H                 -1.60243600    4.31698200    0.10330800
 C                  1.81098400    3.10255300   -1.07818000
 H                  1.69101700    3.68111100   -1.98653000
 C                 -6.08864700   -1.89312400   -0.05241300
 H                 -7.09653700   -2.28890500   -0.05951300
 C                  2.88410500    1.69080100   -3.54855900
 H                  3.91373500    1.68301000   -3.18808600
 H                  2.61301800    2.72699500   -3.76208300
 H                  2.84251000    1.14329900   -4.49202000
 C                  4.54286500   -0.64212700    1.25487700
 H                  4.57765200    0.43164400    1.44810700
 H                  5.56801600   -1.01320100    1.21308000
 H                  4.03296000   -1.13364800    2.08362700
 C                 -3.65606900    3.66131500    0.09577700
 H                 -4.04954400    4.66973900    0.12636200
 C                  4.67155800   -0.23335200   -1.17926100
 H                  4.24882800   -0.42852600   -2.16449900
 H                  5.68827200   -0.62959400   -1.16051100
 H                  4.72248800    0.84603800   -1.01988500
 C                  2.16618200   -2.69573200   -0.06250200
 C                  1.95082700   -3.28935900    1.33375400
 C                  1.52031300   -3.59985400   -1.10595600
 H                  0.88368300   -3.37911400    1.54519700
 H                  2.39993400   -2.66782600    2.11156100
 H                  0.46496400   -3.75500700   -0.87304800
 H                  1.58700800   -3.15801700   -2.10273600
 H                  2.40443000   -4.28192300    1.38039700
 H                  2.02378200   -4.56933000   -1.12111300
80
e-2-1
 Au                -0.41221100   -0.74941600    0.02092500
 N                 -2.36243500   -0.30240300    0.01483000
 C                 -4.66107200   -0.31763800    0.00712800
 C                  1.74893300    2.10146200    1.11043500
 N                  2.37735000    0.00440300    0.00235200
 C                  3.83291400   -0.35220500   -0.00529100
 C                  1.40840900    3.44849000    1.01018400
 H                  1.25409700    4.02045000    1.91754200
 C                 -4.80699700   -3.08940600    0.05896200
 H                 -4.88441300   -4.17002800    0.07930700
 C                  1.54502900   -1.00233200    0.03126900
 C                 -2.80703000    1.00410300   -0.01062000
 C                  0.33786000    1.40776800    3.03332000
 H                 -0.33644100    0.88059800    2.35396600
 H                 -0.05418000    2.41880700    3.17086600
 H                  0.32318700    0.90184400    4.00124300
 C                  1.66133200    1.94344900   -1.33459900
 C                  1.22959600    4.05346000   -0.22313500
 H                  0.96841600    5.10255800   -0.28175100
 C                 -3.48379200   -1.10356700    0.02614600
 C                  1.93392300    1.37971500   -0.07819600
 C                  0.12265900    1.12898100   -3.11123100
 H                 -0.56029200    0.75046500   -2.34797500
 H                  0.03208100    0.50177100   -4.00024100
 H                 -0.19969800    2.13906400   -3.37562100
 C                 -4.86892900    2.29039600   -0.04315200
 H                 -5.95224600    2.34099100   -0.04828600
 C                 -2.04601500    2.17630200   -0.02899000
 H                 -0.96023200    2.13060000   -0.02264400
 C                  1.76580000    1.45864300    2.48228900
 H                  2.11307800    0.42908900    2.37969800
 C                  1.57438900    1.14395800   -2.62079200
 H                  1.86215900    0.11036200   -2.41218400
 C                 -4.22000000    1.05592600   -0.01718400
 C                 -3.55642700   -2.49746400    0.05217500
 H                 -2.64826300   -3.09114900    0.06697700
 C                  3.78129000   -1.87761000    0.17941900
 H                  4.16968300   -2.14784400    1.16329200
 H                  4.41039700   -2.37184000   -0.56361000
 C                 -5.91117800   -0.93595200    0.01433600
 H                 -6.81769600   -0.34083300   -0.00012600
 C                  2.67718300    2.18724200    3.46781300
 H                  3.69611800    2.28906500    3.09132900
 H                  2.71162600    1.64656300    4.41557400
 H                  2.29617300    3.18872600    3.67899000
 C                 -2.71133600    3.38969300   -0.05532700
 H                 -2.13506200    4.30861700   -0.07029300
 C                  1.32887700    3.29645900   -1.37862900
 H                  1.11326300    3.75195400   -2.33794700
 C                 -5.97948900   -2.31868000    0.04014600
 H                 -6.94285700   -2.81307300    0.04614900
 C                  2.47283600    1.69784000   -3.72590600
 H                  3.51961600    1.75772400   -3.42713900
 H                  2.14917000    2.70061500   -4.01362500
 H                  2.40401300    1.06673600   -4.61401400
 C                  4.57396000    0.34351600    1.12575300
 H                  4.49399900    1.42918000    1.03739500
 H                  5.62964600    0.07311700    1.06803400
 H                  4.19675200    0.03630300    2.10201300
 C                 -4.11324500    3.45172000   -0.06243100
 H                 -4.60527900    4.41617300   -0.08284700
 C                  4.45930800    0.05647700   -1.33104100
 H                  3.98457200   -0.44864600   -2.17365500
 H                  5.51653700   -0.21293800   -1.31994000
 H                  4.38291100    1.13610300   -1.47422000
 C                  2.30677300   -2.29910500    0.03521200
 C                  1.81867400   -3.18881600    1.18633000
 C                  2.03088700   -2.96734000   -1.32719600
 H                  0.81850400   -3.55583500    0.92986900
 H                  0.94694200   -3.00749000   -1.47322200
 H                  2.42631300   -2.31333800   -2.11419100
 H                  2.47761200   -4.06012400    1.24324600
 C                  2.62666100   -4.36168000   -1.45970400
 H                  2.51695900   -4.72825800   -2.48020800
 H                  3.69183000   -4.37244500   -1.21560300
 H                  2.12569500   -5.07048200   -0.79987100
 C                  1.77083400   -2.47860900    2.53307300
 H                  1.53966200   -3.17737200    3.33674400
 H                  2.72819300   -2.00585400    2.77470200
 H                  1.00197900   -1.70125000    2.53550900
89
e-3-1
 Au                 0.39528100    0.44852800   -0.13882000
 N                  2.36117200    0.79909400   -0.06890800
 C                  4.44137100    1.77553900   -0.02073900
 C                 -0.45722700   -2.71329800    1.38024100
 N                 -1.85029900   -1.31410300   -0.08876400
 C                 -2.75736800    1.88574400   -1.33438200
 H                 -2.57529600    1.39659300   -2.29908300
 C                 -1.92718100    3.62284700    0.26443000
 H                 -1.13754400    4.35612400    0.45144000
 C                 -3.31265100   -1.61532300   -0.11982000
 C                  0.37755500   -3.82109300    1.51911600
 H                  0.71859400   -4.09929000    2.50934100
 C                 -2.99503700    1.51647600    1.12060700
 H                 -2.97340300    0.77460000    1.92709700
 C                  3.41498200    4.35266700   -0.15352400
 H                  3.03389600    5.36581600   -0.20260000
 C                 -1.52284800   -0.04732900   -0.17517500
 C                  3.30830300   -0.19983200    0.01593000
 C                 -1.69102300    2.95222700   -1.08703800
 H                 -1.75642500    3.69951900   -1.88550700
 H                 -0.68728100    2.52160300   -1.13289900
 C                  0.57478100   -1.24670100    3.10113000
 H                  1.07995100   -0.68636700    2.31185100
 H                  1.25835600   -2.02675500    3.44538000
 H                  0.38190300   -0.57291500    3.93837300
 C                 -0.38210800   -3.02923900   -1.05002700
 C                  0.80702300   -4.54335000    0.41834200
 H                  1.45397000   -5.40146900    0.54993400
 C                 -1.90830900    2.56860200    1.37174900
 H                 -2.10796000    3.04603700    2.33713500
 H                 -0.91870800    2.10772800    1.43715000
 C                 -3.28845000    4.31574500    0.24125900
 H                 -3.47221400    4.82133200    1.19534400
 H                 -3.30725700    5.07583200   -0.54699200
 C                  3.04442500    1.99584500   -0.08628000
 C                 -0.88127900   -2.37375300    0.08552700
 C                 -2.78303600    0.79402600   -0.24182300
 C                  0.72455600   -1.96578000   -3.00203800
 H                  1.11133400   -1.16754600   -2.36470900
 H                  0.58574200   -1.57089000   -4.01049000
 H                  1.48127700   -2.75326900   -3.04549600
 C                  5.71566600   -0.50609100    0.13217600
 H                  6.72129700   -0.10074800    0.15562200
 C                  3.10250500   -1.58020300    0.07576400
 H                  2.09538500   -1.98706500    0.05705200
 C                 -4.12497900    2.57946900   -1.35176000
 H                 -4.13536000    3.32097300   -2.15690700
 H                 -4.92645000    1.86452700   -1.56323600
 C                 -0.73661500   -1.86950900    2.60966700
 H                 -1.40747300   -1.05297400    2.32944200
 C                 -0.59516900   -2.52799000   -2.46462200
 H                 -1.31863600   -1.70840200   -2.44163700
 C                  4.61306700    0.34405700    0.04650200
 C                  2.52717900    3.29117300   -0.14976900
 H                  1.45321800    3.45112900   -0.19106600
 C                 -3.86347700   -0.26108000   -0.55770400
 H                 -4.82684200   -0.06343700   -0.09092900
 H                 -4.02215900   -0.27574200   -1.64158100
 C                  5.31725600    2.86070000   -0.02608900
 H                  6.38882000    2.70122900    0.02320900
 C                 -1.36901700   -2.66443600    3.75137000
 H                 -2.29698400   -3.15714400    3.46104300
 H                 -1.58063400   -2.00235600    4.59318700
 H                 -0.67987000   -3.43305600    4.10821500
 C                  4.21112000   -2.40419600    0.16210000
 H                  4.06996700   -3.47862600    0.21045600
 C                  0.45322900   -4.12689600   -0.85473400
 H                  0.85265700   -4.64378600   -1.71934500
 C                  4.80121000    4.14413000   -0.09385100
 H                  5.46920500    4.99634800   -0.09880300
 C                 -1.10859700   -3.61872500   -3.40378400
 H                 -2.00115700   -4.11312000   -3.01779600
 H                 -0.34385900   -4.38319500   -3.55715300
 H                 -1.34221900   -3.19347400   -4.38163600
 C                 -4.34486000    2.24164400    1.11886200
 H                 -5.18198300    1.54576400    1.02525000
 H                 -4.46435600    2.74918300    2.08188800
 C                 -3.79641100   -2.05339100    1.25647000
 H                 -3.29631200   -2.97735000    1.55209600
 H                 -4.86874700   -2.24916000    1.20749500
 H                 -3.61881700   -1.29552500    2.01946800
 C                 -4.37659900    3.27284900   -0.01027900
 H                 -5.35629500    3.75826400   -0.03100500
 C                  5.51091700   -1.87546800    0.18892400
 H                  6.35876700   -2.54577100    0.25622600
 C                 -3.63938500   -2.71532600   -1.11783700
 H                 -3.34888600   -2.43607200   -2.12994300
 H                 -4.71815500   -2.88121500   -1.10766400
 H                 -3.14744600   -3.65292400   -0.85004900
81
e-4-1
 Au                 0.38344100    0.65876400   -0.06985600
 N                  2.37580100    0.48175300   -0.02651100
 C                  4.64986100    0.81731000    0.00620300
 C                 -1.34465800   -2.28444500    1.29328400
 N                 -2.27132700   -0.47218500   -0.08744400
 C                 -3.76040300   -0.32040600   -0.12601100
 C                 -0.83653700   -3.58044600    1.36511800
 H                 -0.59614300   -3.99630100    2.33648000
 C                  4.41016800    3.57962500   -0.13014000
 H                  4.33705000    4.65943600   -0.18334800
 C                 -1.58756900    0.64263500   -0.11186300
 C                  2.99721600   -0.74879300    0.04465800
 C                  0.01639600   -1.23922900    3.09077400
 H                  0.65337500   -0.77130400    2.33747200
 H                  0.47541800   -2.19053900    3.37103800
 H                 -0.00384700   -0.59942700    3.97521000
 C                 -1.31927000   -2.46695100   -1.15167700
 C                 -0.59695400   -4.32510000    0.22226800
 H                 -0.20225900   -5.33018600    0.30138200
 C                  3.37528000    1.43057100   -0.05040900
 C                 -1.64457400   -1.77055500    0.02185400
 C                  0.06364900   -1.64816700   -3.04520300
 H                  0.65593800   -1.03623100   -2.36120500
 H                  0.05250600   -1.16482900   -4.02413000
 H                  0.56572900   -2.61344400   -3.14797200
 C                  5.21722200   -1.73363700    0.13956800
 H                  6.29684700   -1.63250500    0.15825900
 C                  2.40638600   -2.01460700    0.09103700
 H                  1.32502100   -2.12078900    0.07138800
 C                 -1.40643700   -1.46762800    2.56987100
 H                 -1.83444300   -0.48889500    2.33948500
 C                 -1.36662400   -1.84468600   -2.53308100
 H                 -1.82833000   -0.85668300   -2.45750800
 C                  4.40343800   -0.60302000    0.06831300
 C                  3.25402200    2.81963500   -0.11904900
 H                  2.27259400    3.28056300   -0.16268300
 C                 -3.90090000    1.18020300   -0.42041700
 H                 -4.70216500    1.61957100    0.17614800
 H                 -4.15988200    1.32415000   -1.47369800
 C                  5.80193900    1.60323900   -0.00609500
 H                  6.78200200    1.14089600    0.03716700
 C                 -2.24238000   -2.13119600    3.66331300
 H                 -3.26179000   -2.34672700    3.34229000
 H                 -2.28815200   -1.48455800    4.54165500
 H                 -1.78440500   -3.07213000    3.97623700
 C                  3.23346900   -3.12214100    0.16174600
 H                  2.79041300   -4.11161400    0.19865900
 C                 -0.80824200   -3.75665800   -1.02323100
 H                 -0.54628500   -4.30972100   -1.91751900
 C                  5.67790600    2.98066900   -0.07412700
 H                  6.56324600    3.60406400   -0.08453100
 C                 -2.16002800   -2.68808400   -3.52996000
 H                 -3.16696100   -2.91215000   -3.17500500
 H                 -1.65322400   -3.63719300   -3.71757400
 H                 -2.23717700   -2.16663700   -4.48588400
 C                 -4.36622100   -0.72704700    1.21038200
 H                 -4.14551300   -1.77506800    1.42137200
 H                 -5.44986100   -0.61176300    1.15639700
 H                 -3.99555900   -0.11459100    2.03293400
 C                  4.63011000   -2.98791600    0.18618200
 H                  5.25104500   -3.87338100    0.24166300
 C                 -4.37180000   -1.18101000   -1.22042900
 H                 -3.99578500   -0.90231300   -2.20461700
 H                 -5.45331600   -1.03481300   -1.21494600
 H                 -4.16918600   -2.24035600   -1.04744600
 C                 -2.52790600    1.81447700   -0.13746700
 C                 -2.44444200    2.49283200    1.24365000
 C                 -2.10700200    2.82239100   -1.21044100
 C                 -3.27795300    3.76773600    1.30213900
 H                 -1.39158400    2.73263600    1.43348900
 H                 -2.75431400    1.78829100    2.02275300
 C                 -2.97986400    4.06930500   -1.16461500
 H                 -1.06092300    3.09736100   -1.02951400
 H                 -2.14555000    2.34203400   -2.19355800
 C                 -2.86868200    4.73740800    0.20041400
 H                 -3.16595600    4.22979900    2.28504500
 H                 -4.34133000    3.52619400    1.19055400
 H                 -2.68623500    4.75914000   -1.95792800
 H                 -4.02624500    3.79685600   -1.35296200
 H                 -3.48070000    5.64069000    0.24073200
 H                 -1.82892900    5.04523900    0.36117400
79
e-5-1
 Au                 0.38751000    0.69019300   -0.05596900
 N                  2.37799100    0.49662000   -0.02135900
 C                  4.65547500    0.80883800    0.00081400
 C                 -1.36723900   -2.24903700    1.28771700
 N                 -2.27683500   -0.42233300   -0.08206900
 C                 -3.76615600   -0.25657400   -0.12187900
 C                 -0.86945000   -3.54935600    1.35338900
 H                 -0.63330700   -3.97226500    2.32273700
 C                  4.44353000    3.57439300   -0.10985600
 H                  4.38113800    4.65530800   -0.15277200
 C                 -1.58261300    0.68650700   -0.09277300
 C                  2.98735100   -0.74090400    0.03593000
 C                  0.00018500   -1.22524100    3.09245500
 H                  0.64319700   -0.76168000    2.34152000
 H                  0.44903200   -2.18195200    3.37068800
 H                 -0.01505200   -0.58798000    3.97881700
 C                 -1.34087100   -2.41915600   -1.15832000
 C                 -0.63452500   -4.28982400    0.20679700
 H                 -0.24770500   -5.29833000    0.28110000
 C                  3.38710600    1.43561500   -0.04293200
 C                 -1.66169600   -1.72665300    0.01855400
 C                  0.05046900   -1.59958400   -3.04543600
 H                  0.64637500   -0.99531400   -2.35776700
 H                  0.04394600   -1.11135900   -4.02198000
 H                  0.54593100   -2.56781700   -3.15234800
 C                  5.19785800   -1.74865200    0.10863300
 H                  6.27852600   -1.65840900    0.12139600
 C                  2.38419600   -2.00110900    0.07583300
 H                  1.30174500   -2.09667600    0.06273900
 C                 -1.42389400   -1.43778400    2.56819800
 H                 -1.84245400   -0.45364400    2.34222000
 C                 -1.38180300   -1.78849900   -2.53604400
 H                 -1.83621300   -0.79756200   -2.45481400
 C                  4.39502600   -0.60943700    0.05217900
 C                  3.27962900    2.82633300   -0.09865700
 H                  2.30297400    3.29793000   -0.13202000
 C                 -3.88747200    1.24545800   -0.41535700
 H                 -4.69160500    1.70902000    0.15976400
 H                 -4.11313200    1.38575800   -1.47710000
 C                  5.81559000    1.58284800   -0.01149000
 H                  6.79102900    1.11004800    0.02196600
 C                 -2.26823900   -2.09907500    3.65650300
 H                 -3.28931500   -2.30184500    3.33252100
 H                 -2.30848300   -1.45746200    4.53879100
 H                 -1.82058000   -3.04668900    3.96411300
 C                  3.20054200   -3.11746500    0.13175600
 H                  2.74772600   -4.10270100    0.16337400
 C                 -0.84004600   -3.71343700   -1.03604500
 H                 -0.58129800   -4.26389000   -1.93286700
 C                  5.70532400    2.96198700   -0.06669800
 H                  6.59694500    3.57636100   -0.07676600
 C                 -2.18056800   -2.61993400   -3.53864000
 H                 -3.18951800   -2.83839800   -3.18592300
 H                 -1.68079000   -3.57174400   -3.73130000
 H                 -2.25280800   -2.09236400   -4.49158000
 C                 -4.38098700   -0.66966700    1.20847600
 H                 -4.17616700   -1.72375000    1.40548900
 H                 -5.46257500   -0.53801200    1.15283500
 H                 -4.00496700   -0.07633500    2.04187900
 C                  4.59854000   -2.99740100    0.14818300
 H                  5.21093000   -3.88943500    0.19212200
 C                 -4.38164100   -1.10687200   -1.22241500
 H                 -4.00016700   -0.82750500   -2.20423800
 H                 -5.46174700   -0.95066100   -1.21945200
 H                 -4.18941600   -2.16877600   -1.05341200
 C                 -2.51620800    1.86206800   -0.09941600
 C                 -2.46055300    2.50749100    1.29447700
 C                 -2.09016400    2.91207400   -1.12603600
 C                 -3.15710200    3.83619200    1.30928600
 H                 -1.41071600    2.61788100    1.59345300
 H                 -2.91585400    1.83887200    2.03315100
 C                 -3.10282800    4.04873000   -1.17031800
 H                 -1.10560700    3.29253700   -0.83501000
 H                 -1.97877200    2.44691800   -2.11000700
 C                 -3.46247900    4.51643500    0.20799700
 H                 -3.41981100    4.24187800    2.28040300
 H                 -2.70052500    4.88305000   -1.74984700
 H                 -4.01060000    3.73407200   -1.70039300
 H                 -3.98745700    5.46183800    0.29482800
82
e-7-1
 Au                 0.37798500    0.62023700   -0.12339300
 N                  2.36543300    0.40676500   -0.06359500
 C                  4.64147900    0.72984700   -0.03103700
 C                 -1.31383000   -2.20254200    1.37826900
 N                 -2.25822700   -0.48903000   -0.11282400
 C                 -3.74975900   -0.37817000   -0.16462800
 C                 -0.81470400   -3.49534300    1.53099300
 H                 -0.57128700   -3.84881000    2.52598600
 C                  4.41827600    3.49318800   -0.17569100
 H                  4.35115600    4.57331000   -0.22963800
 C                 -1.60186400    0.64676300   -0.16644200
 C                  2.97973600   -0.82594400    0.02239700
 C                  0.06321800   -1.06275700    3.10536100
 H                  0.71001500   -0.66636700    2.32015200
 H                  0.50430400   -1.99781500    3.45944700
 H                  0.05383200   -0.35701400    3.93841700
 C                 -1.30747200   -2.54705700   -1.04942000
 C                 -0.58903500   -4.31595900    0.43853600
 H                 -0.20168300   -5.31683200    0.58166700
 C                  3.37032600    1.35014400   -0.09186300
 C                 -1.61761500   -1.77061100    0.07693400
 C                  0.06286700   -1.82579300   -2.98933100
 H                  0.63907300   -1.15241300   -2.35094700
 H                  0.04560300   -1.41736700   -4.00178500
 H                  0.58560200   -2.78537200   -3.01716400
 C                  5.19319000   -1.82326200    0.12906800
 H                  6.27346800   -1.72905100    0.14570000
 C                  2.38068200   -2.08612200    0.09066300
 H                  1.29898000   -2.18224200    0.07860100
 C                 -1.36384700   -1.30680200    2.60202700
 H                 -1.78488800   -0.33960100    2.31357800
 C                 -1.36473800   -2.01509400   -2.46728800
 H                 -1.84519300   -1.03328300   -2.45339200
 C                  4.38665200   -0.68835800    0.04387600
 C                  3.25767500    2.73977700   -0.16200500
 H                  2.27940200    3.20881000   -0.19963700
 C                 -3.90340900    1.06996100   -0.62157400
 H                 -4.79111400    1.52709200   -0.18431900
 H                 -4.01380100    1.09808400   -1.71103400
 C                  5.79801700    1.50889200   -0.04671800
 H                  6.77524900    1.04088500   -0.00070200
 C                 -2.19847900   -1.89321500    3.74009600
 H                 -3.22298400   -2.11718800    3.44273500
 H                 -2.22942500   -1.19339000    4.57736300
 H                 -1.74732800   -2.81797200    4.10656500
 C                  3.20020200   -3.19814300    0.17581900
 H                  2.75044800   -4.18383300    0.23036100
 C                 -0.80471500   -3.82921700   -0.84047000
 H                 -0.55350200   -4.44180200   -1.69828500
 C                  5.68231600    2.88688200   -0.12007500
 H                  6.57136400    3.50489600   -0.13285600
 C                 -2.14001200   -2.93486000   -3.40963900
 H                 -3.13509200   -3.17341700   -3.03114500
 H                 -1.60400700   -3.87529400   -3.55459500
 H                 -2.24408300   -2.46701400   -4.39039200
 C                 -4.33911500   -0.62712600    1.21703900
 H                 -4.10709100   -1.64111200    1.54655900
 H                 -5.42427000   -0.52630600    1.16479600
 H                 -3.96007800    0.08076300    1.95525000
 C                  4.59784700   -3.07288100    0.19388100
 H                  5.21312700   -3.96150100    0.26079400
 C                 -4.35875500   -1.36562000   -1.14585300
 H                 -4.00019000   -1.19457700   -2.16020600
 H                 -5.44213600   -1.23300200   -1.14167700
 H                 -4.14042300   -2.39653000   -0.85893300
 C                 -2.59544600    1.77385900   -0.23836100
 C                 -2.24426800    2.98231200   -1.12898700
 C                 -2.63758400    2.63465700    1.05902900
 C                 -3.45121800    3.88707100   -0.84847200
 C                 -1.03008300    3.61823500   -0.44271600
 H                 -2.09620700    2.74232900   -2.18287800
 C                 -3.67728800    3.70056600    0.67484600
 C                 -1.27101300    3.32667000    1.05890800
 H                 -2.86499900    2.09175900    1.97813000
 H                 -3.24279700    4.92157200   -1.12307200
 H                 -4.32708300    3.56727400   -1.41705200
 H                 -0.09545000    3.17154700   -0.78654500
 H                 -0.98341100    4.68682300   -0.66050400
 H                 -3.50110400    4.61783800    1.23863900
 H                 -4.69757000    3.38198500    0.89326200
 H                 -0.49063400    2.67655800    1.46015100
 H                 -1.29448200    4.23101000    1.66858200
89
e-8-1
 Au                 0.47878700    0.29923400    0.06794800
 N                  2.47656300    0.21189700    0.17352500
 C                  4.73220600    0.63874200    0.29369500
 C                 -1.30479000   -2.89173700    0.89561700
 N                 -2.10472900   -0.93644300   -0.34069900
 C                 -3.57315700   -0.84476100   -0.60694500
 C                 -0.71887000   -4.15564900    0.88380600
 H                 -0.62023800   -4.69797700    1.81689900
 C                  4.40874800    3.36422400   -0.12166500
 H                  4.30342600    4.42877700   -0.29472000
 C                 -1.48140900    0.19158200   -0.12307200
 C                  3.13801900   -0.98513900    0.35977300
 C                 -0.37899200   -1.97603000    3.01220900
 H                  0.29222600   -1.32517500    2.44751200
 H                  0.15722000   -2.90374900    3.22877200
 H                 -0.61788800   -1.48833900    3.95966300
 C                 -0.83853400   -2.70219100   -1.50509100
 C                 -0.22974500   -4.70818200   -0.28883900
 H                  0.22094700   -5.69260100   -0.27950400
 C                  3.44112700    1.19374400    0.11701400
 C                 -1.41511700   -2.20885200   -0.32501200
 C                 -2.46749200    1.34421500   -0.14407600
 C                  0.80507700   -1.63042300   -3.03641800
 H                  1.29734700   -1.17343300   -2.17612000
 H                  0.92567400   -0.96805000   -3.89581900
 H                  1.31928100   -2.56903500   -3.25726600
 C                  5.38405700   -1.87195700    0.63705500
 H                  6.45637200   -1.72621200    0.70843200
 C                  2.59325800   -2.26959000    0.44546200
 H                  1.52029300   -2.42159000    0.36324100
 C                 -1.66262700   -2.26988700    2.23083500
 H                 -2.15556300   -1.31216700    2.05265800
 C                 -0.68304700   -1.88663000   -2.77447700
 H                 -1.16189800   -0.91405400   -2.62880600
 C                  4.53429900   -0.78180900    0.44880100
 C                  3.28054300    2.56301400   -0.10469900
 H                  2.29294600    2.97595400   -0.28580700
 C                 -3.81887900    0.67372800   -0.49686600
 H                 -4.57141500    0.88861500    0.25924000
 H                 -4.21013100    1.06132900   -1.43546200
 C                  5.85512500    1.46525800    0.27418200
 H                  6.84621400    1.04680700    0.41130500
 C                 -2.58860100   -3.15199600    3.06586500
 H                 -3.49298200   -3.43364300    2.52422100
 H                 -2.88037500   -2.62846300    3.97858800
 H                 -2.07954000   -4.07025900    3.36693400
 C                  3.45572900   -3.33646900    0.62758300
 H                  3.04920400   -4.34000100    0.69334000
 C                 -0.26561300   -3.97216300   -1.46167700
 H                  0.18756000   -4.37321000   -2.36058700
 C                  5.68936000    2.82525600    0.07237800
 H                  6.55216700    3.47926300    0.05380300
 C                 -1.29317700   -2.57298100   -3.99631500
 H                 -2.34862800   -2.81206400   -3.86475600
 H                 -0.76454600   -3.50471100   -4.21049200
 H                 -1.19121600   -1.93191500   -4.87416600
 C                 -4.36942000   -1.66953700    0.39665400
 H                 -4.09043800   -2.72333200    0.32781600
 H                 -5.42977800   -1.58211200    0.15459900
 H                 -4.22488200   -1.34288000    1.42464200
 C                  4.84230800   -3.14401700    0.72692500
 H                  5.49138100   -3.99878100    0.87103400
 C                 -3.89061800   -1.38806100   -1.99396300
 H                 -3.35263200   -0.85633700   -2.77803700
 H                 -4.96129600   -1.28041100   -2.17509800
 H                 -3.63867200   -2.44869200   -2.05485300
 C                 -1.94418800    2.30049800   -1.21304800
 C                 -2.18744600    2.04407100   -2.56414400
 C                 -1.10662700    3.36335400   -0.87637200
 C                 -1.64989200    2.84059300   -3.56248900
 H                 -2.80168600    1.19995600   -2.85248800
 C                 -0.57991400    4.16940400   -1.88506000
 C                 -0.84480100    3.91985300   -3.22061200
 H                 -1.85726800    2.61734300   -4.60114800
 H                  0.06010300    4.99914000   -1.60434200
 H                 -0.42030000    4.55364000   -3.98843100
 C                 -2.44376800    1.94895600    1.25989300
 C                 -3.19146800    1.37308500    2.28986100
 C                 -1.62193000    3.03232600    1.56509500
 C                 -3.15602700    1.86994000    3.58264500
 H                 -3.82166900    0.51766900    2.08678400
 C                 -1.60602700    3.54245500    2.86288900
 C                 -2.36308900    2.97347800    3.87173800
 H                 -3.74967900    1.40100500    4.35693900
 H                 -0.97180700    4.39616900    3.07545800
 H                 -2.33186000    3.38098300    4.87400700
 C                 -0.70726100    3.62898600    0.54270400
 H                 -0.61106800    4.70517300    0.70831900
 H                  0.29410600    3.20751100    0.70496800
86
e-9-1
 Au                 0.44694800    0.19723900    0.00016300
 N                  2.40869300   -0.17218300    0.00021800
 C                  4.70098500   -0.01981800   -0.00016200
 C                 -1.66345900   -2.59074800    1.22571800
 N                 -2.35434000   -0.57645500    0.00009300
 C                 -3.80432700   -0.20937600    0.00013200
 C                 -1.31070700   -3.93849800    1.19721500
 H                 -1.11771400   -4.45024200    2.13276400
 C                  4.67672600    2.75729300   -0.00013300
 H                  4.68976500    3.84095100   -0.00012700
 C                 -1.50727600    0.41843500    0.00015700
 C                  2.92747300   -1.44951900    0.00010000
 C                 -0.18847800   -1.83884900    3.08115400
 H                  0.49769600   -1.39802800    2.35500700
 H                  0.15696800   -2.85302500    3.29682400
 H                 -0.13488900   -1.25841700    4.00449000
 C                 -1.66338400   -2.59030500   -1.22617300
 C                 -1.16436000   -4.61870600   -0.00056600
 H                 -0.89053300   -5.66617800   -0.00076000
 C                  3.47880200    0.69461300    0.00004800
 C                 -1.90556600   -1.95235700   -0.00012100
 C                 -0.18841000   -1.83790200   -3.08145600
 H                  0.49789200   -1.39756600   -2.35514200
 H                 -0.13483200   -1.25698100   -4.00448300
 H                  0.15687400   -2.85200900   -3.29772300
 C                  5.06127100   -2.61261100   -0.00029300
 H                  6.14575100   -2.60054600   -0.00046400
 C                  2.23514800   -2.66416100    0.00017200
 H                  1.14765400   -2.68075100    0.00033300
 C                 -1.62752500   -1.86513300    2.55632100
 H                 -1.93417700   -0.82877200    2.39722900
 C                 -1.62741700   -1.86425800   -2.55652500
 H                 -1.93398600   -0.82792200   -2.39709500
 C                  4.34163500   -1.41773700   -0.00013000
 C                  3.46406600    2.09111500    0.00006900
 H                  2.51850800    2.62707400    0.00021600
 C                 -3.74644800    1.33156100    0.00049500
 H                 -4.25009800    1.73229400    0.88142700
 H                 -4.25063400    1.73281900   -0.87988600
 C                  5.91100100    0.67398000   -0.00036300
 H                  6.85262200    0.13588100   -0.00052300
 C                 -2.54164300   -2.50032300    3.60271500
 H                 -3.57653200   -2.57241200    3.26622500
 H                 -2.51836600   -1.91565300    4.52449200
 H                 -2.19911200   -3.50799100    3.84840200
 C                  2.97097500   -3.83645400   -0.00000400
 H                  2.45109200   -4.78833600    0.00003600
 C                 -1.31060100   -3.93806200   -1.19810500
 H                 -1.11749400   -4.44947900   -2.13381100
 C                  5.89416000    2.05865900   -0.00034700
 H                  6.82565200    2.61092600   -0.00049200
 C                 -2.54162100   -2.49906100   -3.60310000
 H                 -3.57652300   -2.57106200   -3.26664700
 H                 -2.19924000   -3.50672900   -3.84899600
 H                 -2.51823100   -1.91418100   -4.52474100
 C                 -4.49290600   -0.76327000    1.23817100
 H                 -4.42240100   -1.85259600    1.26457500
 H                 -5.54843100   -0.48858900    1.20788900
 H                 -4.05965300   -0.35763900    2.15380900
 C                  4.37424900   -3.81607400   -0.00023300
 H                  4.92168000   -4.75044700   -0.00035000
 C                 -4.49280400   -0.76275000   -1.23818800
 H                 -4.05939900   -0.35683500   -2.15363000
 H                 -5.54829600   -0.48795300   -1.20791300
 H                 -4.42240300   -1.85207100   -1.26496400
 C                 -2.26210400    1.72868600    0.00025700
 C                 -1.73583000    2.52476300   -1.17546100
 C                 -1.73555300    2.52479400    1.17582900
 C                 -1.94385400    2.30173700   -2.52404200
 C                 -0.87464200    3.53431600   -0.73239700
 C                 -1.94320300    2.30171300    2.52445800
 C                 -0.87447000    3.53433500    0.73255700
 C                 -1.27680500    3.10804600   -3.44264800
 H                 -2.61228000    1.51515100   -2.86234900
 C                 -0.19866600    4.32814200   -1.64957100
 C                 -1.27587700    3.10798300    3.44290100
 H                 -2.61156400    1.51514600    2.86293300
 C                 -0.19819900    4.32810700    1.64956400
 C                 -0.40778400    4.10558300   -3.00607000
 H                 -1.42701000    2.95552300   -4.50366700
 H                  0.47975700    5.10516000   -1.31766800
 C                 -0.40694700    4.10550600    3.00611400
 H                 -1.42580000    2.95543300    4.50395700
 H                  0.48017700    5.10509200    1.31749200
 H                  0.11166500    4.71467200   -3.73473600
 H                  0.11274200    4.71453500    3.73465900
81
e-10-1
 Au                -0.46589600   -0.58525600   -0.37938500
 N                 -2.43838600   -0.64458500   -0.06342800
 C                 -4.66658800   -1.19226300    0.07311300
 C                  1.29469500    2.10733700    1.49964700
 N                  2.06342300    0.80999900   -0.44086600
 C                  3.52518000    0.84926300   -0.78035400
 C                  0.68451400    3.25782500    1.99659500
 H                  0.60708600    3.38874400    3.06947600
 C                 -4.26748200   -3.75483800   -0.91654300
 H                 -4.13162700   -4.75884300   -1.30070500
 C                  1.47138500   -0.33596500   -0.66002100
 C                 -3.12519700    0.44402600    0.43542600
 C                  0.47608500    0.39754500    3.10862800
 H                 -0.20882500    0.01256900    2.34877100
 H                 -0.07050000    1.13503000    3.70207700
 H                  0.76454600   -0.42428600    3.76882700
 C                  0.76744500    2.86800000   -0.77096200
 C                  0.14823400    4.21114200    1.14742100
 H                 -0.32204400    5.09802200    1.55306900
 C                 -3.37064900   -1.63622800   -0.28334200
 C                  1.37210600    1.95624200    0.10727300
 C                  2.48988500   -1.32529000   -1.19024000
 C                 -0.84302900    2.38705400   -2.60678900
 H                 -1.25378400    1.54377600   -2.04770600
 H                 -0.95323800    2.18478100   -3.67402800
 H                 -1.44152800    3.26876600   -2.36449500
 C                 -5.37746100    1.13970000    1.02498500
 H                 -6.43907600    0.93502400    1.10992300
 C                 -2.61424600    1.68877300    0.81244700
 H                 -1.55064500    1.89635700    0.73162800
 C                  1.71887600    1.03344400    2.47998800
 H                  2.25012500    0.25277500    1.93427400
 C                  0.62850600    2.63517000   -2.26224100
 H                  1.19077900    1.73591500   -2.53211500
 C                 -4.50672300    0.16348600    0.54078400
 C                 -3.16886600   -2.92467500   -0.78110200
 H                 -2.17159900   -3.25652000   -1.05068500
 C                  3.62020600   -0.39311600   -1.66410300
 H                  4.60965700   -0.84726200   -1.61729700
 H                  3.42185700   -0.10610100   -2.70204500
 C                 -5.75956000   -2.04627000   -0.07199800
 H                 -6.75558300   -1.71365700    0.19897700
 C                  2.63722100    1.56297200    3.57993200
 H                  3.50630900    2.08697700    3.17920400
 H                  2.98948000    0.73735300    4.20101400
 H                  2.10148800    2.25634100    4.23191300
 C                 -3.49690700    2.64255800    1.28891200
 H                 -3.11658000    3.61420700    1.58557700
 C                  0.17094100    4.00081700   -0.22170300
 H                 -0.30777100    4.71442900   -0.88181600
 C                 -5.55598400   -3.32366800   -0.56604700
 H                 -6.39462800   -3.99838100   -0.68421300
 C                  1.15311400    3.81440600   -3.08200200
 H                  2.16856700    4.09731300   -2.80066700
 H                  0.51429900    4.68917800   -2.94265400
 H                  1.14090100    3.56951300   -4.14568000
 C                  4.37162700    0.74646200    0.48228900
 H                  4.16660000    1.59055600    1.14336800
 H                  5.42552600    0.78360300    0.20199500
 H                  4.19130600   -0.18459800    1.02116400
 C                 -4.87019200    2.37472200    1.39613300
 H                 -5.53609700    3.14092300    1.77320700
 C                  3.88915100    2.12165700   -1.52500400
 H                  3.34031700    2.20640000   -2.46190300
 H                  4.95521500    2.09473900   -1.75656400
 H                  3.69442600    3.00723100   -0.91616200
 C                  2.94039000   -2.28292900   -0.08645300
 C                  4.06065000   -3.08376700   -0.31529000
 C                  2.26562400   -2.42237000    1.12517700
 C                  4.50916400   -3.97984700    0.64368300
 H                  4.58793400   -3.01043900   -1.26066800
 C                  2.71655700   -3.31726200    2.09068100
 H                  1.37150200   -1.84170600    1.32185700
 C                  3.84110700   -4.09489400    1.85768400
 H                  5.38080300   -4.58995400    0.44242700
 H                  2.17608900   -3.40680300    3.02489300
 H                  4.19058500   -4.79102900    2.60930300
 C                  1.88957000   -2.13015600   -2.34418200
 H                  1.07665400   -2.76116500   -1.98170100
 H                  1.49141300   -1.46056100   -3.11049900
 H                  2.65450100   -2.76630100   -2.79437500
90
e-11-1
 Au                -0.49768100   -0.52476000   -0.24455800
 N                 -2.31962100   -1.34331600   -0.13430200
 C                 -4.13855100   -2.74803400   -0.10961400
 C                 -0.28983400    2.75340100    1.51965100
 N                  1.30325800    1.72390400   -0.06878300
 C                  2.67553000    2.31177700   -0.18573200
 C                 -1.39349800    3.58068100    1.72457400
 H                 -1.74564400    3.74361900    2.73631100
 C                 -2.61746600   -4.99488700   -0.69924200
 H                 -2.04083900   -5.88317600   -0.92859200
 C                  1.23590800    0.44145900   -0.33313500
 C                 -3.44270400   -0.59625300    0.15051900
 C                 -0.64654600    0.99931300    3.24942900
 H                 -0.91898200    0.27948400    2.47290000
 H                 -1.56779100    1.46901700    3.60358200
 H                 -0.19559300    0.45778700    4.08419700
 C                 -0.54901600    3.08675600   -0.89288700
 C                 -2.06059900    4.16521800    0.66254900
 H                 -2.91897500    4.80037200    0.84137200
 C                 -2.73790400   -2.64615800   -0.29282400
 C                  0.13591400    2.53737000    0.20403900
 C                  2.55836600   -0.02625400   -0.94654300
 C                 -1.27781600    1.85974100   -2.94080800
 H                 -1.37645000    0.92788500   -2.37985500
 H                 -1.03229000    1.62041500   -3.97798800
 H                 -2.25020700    2.35891700   -2.92765700
 C                 -5.84107600   -0.84016300    0.45255400
 H                 -6.73415700   -1.45498600    0.47760200
 C                 -3.52545200    0.77760700    0.38980800
 H                 -2.63136700    1.39398600    0.36247000
 C                  0.32029100    2.05703600    2.71477500
 H                  1.22510400    1.54914300    2.38526200
 C                 -0.21118900    2.77723600   -2.33842500
 H                  0.74777700    2.25092500   -2.36930400
 C                 -4.59787100   -1.41121600    0.17932300
 C                 -1.97245000   -3.77578800   -0.58887600
 H                 -0.89959400   -3.68821400   -0.72689800
 C                  3.30710700    1.31979800   -1.15543200
 H                  4.37662000    1.24207100   -0.96780000
 H                  3.15695800    1.66889700   -2.18362200
 C                 -4.76701200   -3.98770800   -0.22567500
 H                 -5.83911200   -4.07429300   -0.08666000
 C                  0.71190400    3.03632000    3.81930400
 H                  1.36283600    3.83009900    3.44575900
 H                  1.23242000    2.51024400    4.62155600
 H                 -0.17091200    3.50792100    4.25583600
 C                 -4.76898400    1.32199400    0.65908100
 H                 -4.85168900    2.38715700    0.84760800
 C                 -1.64597800    3.90413100   -0.63371700
 H                 -2.19604000    4.32495600   -1.46690000
 C                 -4.00485800   -5.10573400   -0.51993900
 H                 -4.47893200   -6.07482500   -0.61317900
 C                 -0.09216600    4.04275300   -3.18951800
 H                  0.56663100    4.78724600   -2.73922400
 H                 -1.07062800    4.50701900   -3.32771900
 H                  0.28968200    3.79279500   -4.18098700
 C                  3.37336100    2.27371400    1.16925800
 H                  2.86784300    2.91804200    1.89078700
 H                  4.39593500    2.63538500    1.04960000
 H                  3.41581200    1.25389800    1.56010400
 C                 -5.92212300    0.52239700    0.69164600
 H                 -6.88155900    0.97707300    0.90497000
 C                  2.65540000    3.73485000   -0.70967700
 H                  2.19185300    3.79573400   -1.69304200
 H                  3.68524400    4.08522900   -0.79670400
 H                  2.12462400    4.40032600   -0.02584700
 C                  3.43486700   -1.06049200   -0.21408400
 C                  4.62860300   -1.47013200   -0.85513900
 C                  3.14386400   -1.62366500    1.04501400
 C                  5.45967900   -2.40884500   -0.25006400
 C                  4.01093600   -2.56470400    1.60247900
 C                  5.17021300   -2.98576900    0.97541700
 H                  6.37234000   -2.69342800   -0.76642200
 H                  3.76034000   -2.97488700    2.57598200
 C                  2.06263000   -0.62979700   -2.28281700
 H                  1.53632700   -1.56472800   -2.08656800
 H                  1.35686700    0.05208300   -2.76740300
 H                  2.87886000   -0.82049500   -2.97283900
 C                  5.12998300   -1.00046900   -2.20583700
 H                  6.21820500   -0.93246600   -2.17816200
 H                  4.87650000   -1.73109200   -2.97813800
 H                  4.74927200   -0.03958100   -2.53563600
 C                  6.06472200   -4.02443000    1.58714500
 H                  5.78801400   -5.02368400    1.24340900
 H                  7.10693100   -3.85982800    1.31193200
 H                  5.98923000   -4.01883900    2.67468900
 C                  1.93941500   -1.30498000    1.89071400
 H                  1.68274600   -0.24865500    1.89361900
 H                  1.05120800   -1.84314500    1.55228300
 H                  2.13230600   -1.59791600    2.92325800
81
e-12-1
 Au                -0.66576800   -0.50437500   -0.28882800
 N                 -2.31990300   -1.62539200   -0.21981300
 C                 -3.88006600   -3.31210000   -0.27076600
 C                 -1.00690200    2.66479300    1.62704600
 N                  0.72202900    2.01881900   -0.01682800
 C                  1.97464400    2.83529100   -0.10074900
 C                 -2.22741400    3.28948700    1.88135000
 H                 -2.59282800    3.32948400    2.90074800
 C                 -2.00300200   -5.25160000   -0.92177600
 H                 -1.28529900   -6.02276100   -1.17555100
 C                  0.86779900    0.75518500   -0.32669800
 C                 -3.55390800   -1.08593100    0.07572800
 C                 -1.08779800    0.78529700    3.25579600
 H                 -1.28533500    0.08386800    2.44082400
 H                 -2.05245500    1.10315800    3.65969300
 H                 -0.54588100    0.25986000    4.04613000
 C                 -1.33683500    3.10156000   -0.76118900
 C                 -2.98835900    3.82382000    0.85650500
 H                 -3.93619500    4.30008100    1.07326100
 C                 -2.51456900   -2.97257600   -0.43109600
 C                 -0.56219600    2.60843100    0.30150500
 C                  2.24873500    0.55335300   -0.96374600
 C                 -1.87240400    1.87053000   -2.86234900
 H                 -1.80649800    0.91149800   -2.34381900
 H                 -1.60244100    1.72267600   -3.91044600
 H                 -2.91469600    2.19748500   -2.82199700
 C                 -5.88056500   -1.73631700    0.33558700
 H                 -6.65861300   -2.49179700    0.32650700
 C                 -3.86706200    0.24535300    0.36171100
 H                 -3.08905500    1.00352800    0.36865400
 C                 -0.28378400    1.99426100    2.77265900
 H                  0.67369600    1.62967100    2.40379900
 C                 -0.96854900    2.92660700   -2.22159700
 H                  0.06524600    2.57211500   -2.28239200
 C                 -4.55746300   -2.08197500    0.05980000
 C                 -1.57027500   -3.94770900   -0.75795100
 H                 -0.52580200   -3.67842200   -0.87612800
 C                  2.76966400    2.00759500   -1.10517900
 H                  3.83789000    2.10390600   -0.92205300
 H                  2.56867400    2.36147200   -2.12136200
 C                 -4.29315500   -4.63339900   -0.44046500
 H                 -5.33696300   -4.90157800   -0.31905400
 C                 -0.02036300    2.95336700    3.93185900
 H                  0.50067100    3.85626100    3.60580500
 H                  0.58383900    2.46239400    4.69691300
 H                 -0.95641700    3.26279200    4.40186100
 C                 -5.18610800    0.56486800    0.63254500
 H                 -5.44651500    1.59385300    0.85692800
 C                 -2.54970600    3.71197500   -0.45358000
 H                 -3.16934700    4.08598300   -1.25978000
 C                 -3.35399700   -5.59758700   -0.76538900
 H                 -3.65989800   -6.62752000   -0.90034800
 C                 -1.07462900    4.23352600   -3.00872200
 H                 -0.54212900    5.05446500   -2.52533600
 H                 -2.11864100    4.53407000   -3.11686300
 H                 -0.67130000    4.09954600   -4.01400800
 C                  2.65949100    2.86250700    1.26052600
 H                  2.04328800    3.38047600    1.99719000
 H                  3.60661800    3.39700100    1.17154200
 H                  2.86233600    1.85052900    1.61925000
 C                 -6.18988000   -0.41605500    0.62115600
 H                 -7.21339200   -0.13564000    0.83681800
 C                  1.71584300    4.25426500   -0.56975000
 H                  1.25821400    4.27618700   -1.55738600
 H                  2.67137300    4.77827900   -0.62622000
 H                  1.07295300    4.79020300    0.13114500
 C                  3.26721100   -0.36281300   -0.27718000
 C                  4.51053300   -0.60943200   -0.89756600
 C                  3.10076800   -1.03568700    0.94340300
 C                  5.45478600   -1.49615200   -0.40596600
 C                  4.02810200   -1.93608500    1.45633900
 C                  5.19806600   -2.17732100    0.76871300
 H                  6.38269500   -1.64269000   -0.94027500
 H                  3.82576800   -2.43024500    2.39596000
 C                  1.85548300   -0.05948700   -2.33046700
 H                  1.50179700   -1.08119400   -2.18815600
 H                  1.03024800    0.51608000   -2.75936400
 H                  2.68152400   -0.05101400   -3.03456900
 Cl                 5.02201200    0.21824300   -2.33201500
 Cl                 1.75291300   -0.76966000    1.98394300
 Cl                 6.34806600   -3.29219800    1.38428800
99
e-13-1
 Au                -0.67063700   -0.44651100   -0.38020200
 N                 -2.52978700   -1.18380200   -0.44342600
 C                 -4.38692600   -2.53760500   -0.41201600
 C                 -0.56248700    2.74503800    1.45478800
 N                  1.18818900    1.70891700    0.05066900
 C                  2.58621100    2.23020000    0.14741600
 C                 -1.62466200    3.64379700    1.55112800
 H                 -2.10613800    3.78431500    2.51177600
 C                 -2.91206500   -4.84908500   -0.85061200
 H                 -2.35398400   -5.76160500   -1.02356300
 C                  1.10426600    0.43398900   -0.23951300
 C                 -3.64006700   -0.39492100   -0.22856400
 C                 -1.33941900    0.97064000    3.01120700
 H                 -1.55083500    0.29152400    2.18097500
 H                 -2.25600000    1.52767900    3.22136600
 H                 -1.09728500    0.37690500    3.89587600
 C                 -0.45553200    3.20921000   -0.94901500
 C                 -2.09374600    4.32499100    0.44186000
 H                 -2.92314500    5.01437300    0.53699900
 C                 -2.97884100   -2.48132700   -0.55457500
 C                  0.03534600    2.56974300    0.20116100
 C                  2.48182400   -0.09208300   -0.65306100
 C                 -0.97117300    2.06858200   -3.10339100
 H                 -1.17813300    1.13008100   -2.58428900
 H                 -0.61063500    1.84105700   -4.10908000
 H                 -1.91453300    2.61338400   -3.19441000
 C                 -6.05178300   -0.56228200    0.01347400
 H                 -6.96181600   -1.15169100    0.03859200
 C                 -3.69181900    0.99019700   -0.05332900
 H                 -2.78131900    1.58232000   -0.08638000
 C                 -0.19572500    1.93215300    2.67731000
 H                  0.69048400    1.34095700    2.44514800
 C                  0.05263800    2.91942800   -2.34811800
 H                  0.98030900    2.34362500   -2.27246400
 C                 -4.81754300   -1.17714900   -0.19864900
 C                 -2.23685100   -3.64339500   -0.77662500
 H                 -1.15918100   -3.59090600   -0.89486900
 C                  3.30223900    1.22457000   -0.74577100
 H                  4.33557900    1.10738400   -0.42394200
 H                  3.29849100    1.58780500   -1.78018300
 C                 -5.04579800   -3.76416000   -0.49103900
 H                 -6.12369100   -3.81577600   -0.38300500
 C                  0.12692400    2.80546900    3.88816200
 H                  0.88448800    3.55856300    3.66134300
 H                  0.49242100    2.18313700    4.70834700
 H                 -0.76504300    3.32676000    4.24260300
 C                 -4.92663700    1.57790400    0.15880300
 H                 -4.98534700    2.65225600    0.29745500
 C                 -1.52365300    4.08929800   -0.79962000
 H                 -1.92585800    4.58239900   -1.67648200
 C                 -4.30643900   -4.91470200   -0.70877000
 H                 -4.80436000   -5.87414400   -0.77265300
 C                  0.34070400    4.19493600   -3.14077100
 H                  0.97313200    4.89291200   -2.58931600
 H                 -0.58778100    4.71339600   -3.38824800
 H                  0.83305500    3.94752300   -4.08288200
 C                  3.06493100    2.11993300    1.58909900
 H                  2.46934000    2.75215800    2.24998700
 H                  4.10502800    2.44472900    1.64876500
 H                  3.00682100    1.08461300    1.93231200
 C                 -6.10167200    0.81083700    0.19308700
 H                 -7.05374500    1.29937400    0.35926000
 C                  2.71399900    3.66309000   -0.33160600
 H                  2.40519200    3.77130300   -1.37016800
 H                  3.76151700    3.95945200   -0.25565900
 H                  2.12179500    4.34061200    0.28674200
 C                  3.21005300   -1.17460300    0.17757300
 C                  4.45486200   -1.63545100   -0.33418800
 C                  2.72733000   -1.75902000    1.36903900
 C                  5.11287700   -2.68930700    0.29235000
 C                  3.42367800   -2.82470300    1.94678700
 C                  4.59854200   -3.30884400    1.41583900
 H                  6.05668600   -3.03184000   -0.11547300
 H                  3.01888400   -3.27884500    2.84322200
 H                  5.11630200   -4.13997700    1.87736100
 C                  2.14087200   -0.68754900   -2.04255100
 H                  1.51031900   -1.56736600   -1.90641800
 H                  1.57365900    0.03801900   -2.63465900
 H                  3.02365300   -0.97628000   -2.60448900
 C                  5.21717400   -1.05368900   -1.52510500
 H                  4.65706800   -0.24015700   -1.97681100
 C                  1.49787000   -1.33555700    2.15398400
 H                  1.06165600   -0.45147000    1.69393400
 C                  6.55563100   -0.46467600   -1.07340500
 H                  7.06537800    0.00797300   -1.91571500
 H                  6.42207000    0.28113200   -0.28642700
 H                  7.21253800   -1.24222500   -0.67906800
 C                  5.45097700   -2.09868400   -2.61770300
 H                  5.92665100   -1.63798000   -3.48606500
 H                  6.10883100   -2.89492900   -2.26471500
 H                  4.51665200   -2.56259400   -2.93892100
 C                  1.84781000   -0.96063500    3.59686200
 H                  2.17700600   -1.83264700    4.16501800
 H                  2.64247900   -0.21319900    3.64847500
 H                  0.96525800   -0.55869600    4.10021600
 C                  0.42391600   -2.42386900    2.14636500
 H                 -0.49699100   -2.05718400    2.60648400
 H                  0.18572300   -2.74571300    1.13073300
 H                  0.76184200   -3.29817000    2.70883100
87
e-14-1
 Au                -1.00809900   -0.39558500   -0.63068900
 N                 -2.64372600   -1.50128900   -0.34587100
 C                 -4.28465100   -3.11048600   -0.35019500
 C                 -0.68766000    2.48078300    1.72320000
 N                  0.45662200    2.08743900   -0.41908200
 C                  1.66293100    2.92260700   -0.73712800
 C                 -1.74502500    3.07014600    2.41474000
 H                 -1.78562100    2.97081500    3.49288100
 C                 -2.74475600   -4.91361500   -1.79334100
 H                 -2.15868800   -5.63117500   -2.35506900
 C                  0.49574400    0.85685100   -0.85986900
 C                 -3.73989900   -1.00785300    0.33466200
 C                 -0.42913500    0.35563800    2.98271600
 H                 -0.86914300   -0.20377100    2.15279200
 H                 -1.24064700    0.61995000    3.66557300
 H                  0.26508400   -0.29673900    3.51560200
 C                 -1.71601100    3.22276500   -0.37688200
 C                 -2.75543800    3.74204800    1.74809500
 H                 -3.56816200    4.19188700    2.30421700
 C                 -2.97318500   -2.77465200   -0.76173700
 C                 -0.66479300    2.61629800    0.32752800
 C                  1.80566300    0.63542300   -1.59103800
 C                 -3.01549000    2.28526500   -2.28177900
 H                 -2.89224400    1.27237900   -1.89277100
 H                 -3.10418900    2.23303300   -3.36871700
 H                 -3.95272200    2.68118300   -1.88298400
 C                 -5.98429700   -1.65225300    1.00424800
 H                 -6.79222600   -2.37502500    1.03271500
 C                 -3.88896800    0.24177700    0.94135700
 H                 -3.08057900    0.96787700    0.91751400
 C                  0.28787500    1.62024000    2.50004900
 H                  1.09533400    1.31695400    1.83141200
 C                 -1.84750800    3.19406600   -1.88698500
 H                 -0.93377300    2.76814000   -2.31363500
 C                 -4.78428000   -1.95942900    0.36329900
 C                 -2.19774100   -3.68005400   -1.48715100
 H                 -1.19230200   -3.41409600   -1.79657600
 C                  2.28230500    2.07747600   -1.85022900
 H                  3.36748500    2.17956900   -1.88107000
 H                  1.87937600    2.40684900   -2.81317100
 C                 -4.81587100   -4.35964500   -0.66971700
 H                 -5.81992600   -4.62514800   -0.35774400
 C                  0.90835400    2.34578600    3.69248500
 H                  1.37169900    3.29209200    3.40806700
 H                  1.66821500    1.71293700    4.15460000
 H                  0.15376100    2.55899300    4.45258200
 C                 -5.08897800    0.52553100    1.57042500
 H                 -5.22171600    1.49097800    2.04678000
 C                 -2.74905900    3.79240400    0.36355200
 H                 -3.57467800    4.25948000   -0.16003000
 C                 -4.04415600   -5.25584900   -1.38990100
 H                 -4.44248300   -6.22979100   -1.64516300
 C                 -2.06553400    4.58884400   -2.47457300
 H                 -1.31602500    5.30534800   -2.13513400
 H                 -3.04618400    4.97399900   -2.18745900
 H                 -2.04013300    4.54693400   -3.56498200
 C                  2.55978200    3.04599400    0.48844600
 H                  2.02259200    3.53869300    1.30091800
 H                  3.42531100    3.65882300    0.23239500
 H                  2.91579700    2.07540000    0.83663000
 C                 -6.13232400   -0.41185800    1.60426200
 H                 -7.05924500   -0.16146600    2.10494600
 C                  1.27275700    4.31067600   -1.21307400
 H                  0.66906400    4.26683200   -2.11834200
 H                  2.18324900    4.86852500   -1.43773800
 H                  0.72117600    4.85320000   -0.44250100
 C                  2.78820200   -0.14520000   -0.72422800
 C                  4.10047400   -0.28776500   -1.16998000
 C                  2.44362900   -0.72457300    0.49385900
 C                  5.04185000   -0.96871400   -0.41325700
 H                  4.40116000    0.13956500   -2.12127500
 C                  3.40013600   -1.38558200    1.25539100
 H                  1.42451200   -0.67086500    0.86280100
 C                  4.70677000   -1.51771300    0.81545300
 H                  5.44439600   -2.03577500    1.41197900
 C                  1.55053200   -0.12826100   -2.89232400
 H                  1.19893200   -1.13849100   -2.67809200
 H                  0.78697000    0.38237500   -3.48339600
 H                  2.46669100   -0.18979100   -3.48321000
 C                  6.43781800   -1.08662300   -0.96328600
 C                  2.99518100   -1.89614200    2.61212300
 F                  7.26458400   -1.70148100   -0.11869600
 F                  3.88323200   -2.75357000    3.11485000
 F                  1.80876800   -2.50378700    2.58120600
 F                  2.88838400   -0.87900500    3.48599600
 F                  6.45095200   -1.77107600   -2.11336700
 F                  6.95607500    0.12017800   -1.23016200
88
e-15-1
 Au                -0.51337300    0.39482600    0.02856500
 N                 -2.49215600    0.49115000   -0.22999500
 C                 -4.68061000    1.15595000   -0.45235400
 C                  1.03905700   -2.78302300   -0.91362900
 N                  1.91795300   -1.05248000    0.57494300
 C                  3.37096500   -1.09951200    0.92449600
 C                  0.36989400   -3.99555900   -1.06770200
 H                  0.27784100   -4.42116500   -2.06016900
 C                 -4.05700800    3.85092600   -0.21033200
 H                 -3.83416400    4.90708500   -0.11546400
 C                  1.42051000    0.13385000    0.33889900
 C                 -3.27409900   -0.63412900   -0.38782500
 C                  0.28532000   -1.62355000   -2.98558300
 H                 -0.41023600   -1.01977100   -2.39805000
 H                 -0.25599500   -2.50041600   -3.35022100
 H                  0.60879700   -1.03696500   -3.84867500
 C                  0.48300900   -2.83911900    1.47631100
 C                 -0.20659000   -4.64187500    0.01410200
 H                 -0.72125200   -5.58388700   -0.12753700
 C                 -3.34145000    1.57568500   -0.26609000
 C                  1.14146500   -2.25715600    0.38458500
 C                  2.54745500    1.16228000    0.36385000
 C                 -1.13388700   -1.76219900    3.02889900
 H                 -1.50178800   -1.12651700    2.22087600
 H                 -1.25049100   -1.22749900    3.97384300
 H                 -1.76503900   -2.65365200    3.06388000
 C                 -5.59452700   -1.28444800   -0.69917100
 H                 -6.64254100   -1.02812200   -0.80941900
 C                 -2.86788500   -1.97090300   -0.41675400
 H                 -1.81775800   -2.23041700   -0.31062200
 C                  1.50220600   -2.04889400   -2.15852200
 H                  2.02381500   -1.13544400   -1.86423700
 C                  0.33213300   -2.15507400    2.82057000
 H                  0.92216800   -1.23407800    2.80890100
 C                 -4.63688600   -0.28443100   -0.52980200
 C                 -3.02638900    2.93018500   -0.14110000
 H                 -1.99737900    3.24097300    0.01219700
 C                  3.65318600    0.39690900    1.11693300
 H                  4.66451700    0.67611500    0.82557300
 H                  3.54772400    0.63338100    2.17841200
 C                 -5.70287600    2.10240500   -0.51892800
 H                 -6.73152700    1.79009600   -0.66219400
 C                  2.44026600   -2.88685300   -3.02603400
 H                  3.29676700   -3.26622300   -2.46747200
 H                  2.81073200   -2.28394300   -3.85813300
 H                  1.91105700   -3.74320900   -3.45053500
 C                 -3.83591400   -2.94591300   -0.58358200
 H                 -3.53839600   -3.98876000   -0.60772800
 C                 -0.17403900   -4.04993000    1.26628900
 H                 -0.69432700   -4.51625500    2.09467100
 C                 -5.38719100    3.44537300   -0.39905100
 H                 -6.17018700    4.19173900   -0.44887100
 C                  0.79599100   -3.03097900    3.98323000
 H                  1.82267900   -3.37786900    3.86141400
 H                  0.15482000   -3.91036600    4.07623300
 H                  0.72688400   -2.47738900    4.92155700
 C                  4.16797400   -1.78137400   -0.18076000
 H                  3.86984600   -2.82976500   -0.25434500
 H                  5.22843600   -1.74807900    0.07654900
 H                  4.03049700   -1.31270400   -1.15206700
 C                 -5.19129400   -2.60999100   -0.72418900
 H                 -5.92538000   -3.39541200   -0.85441300
 C                  3.59610300   -1.87616200    2.21310000
 H                  3.06588400   -1.42664000    3.05277000
 H                  4.66373700   -1.87101600    2.44022800
 H                  3.27698900   -2.91447600    2.10100100
 C                  2.83727600    1.43748200   -1.11541200
 C                  4.06483500    1.18183600   -1.71826800
 C                  1.80766100    1.95537200   -1.90901300
 C                  4.24801000    1.38829000   -3.08322800
 H                  4.89978200    0.81324100   -1.13769500
 C                  1.98389900    2.15625400   -3.26882400
 H                  0.85883700    2.20550700   -1.44709900
 C                  3.20515500    1.86000600   -3.86594400
 H                  5.21229400    1.17906100   -3.52910800
 H                  1.16640400    2.54661700   -3.86131300
 H                  3.34529200    2.01210300   -4.92853100
 C                  2.13790800    2.42202100    1.11126800
 C                  1.36851100    2.30251300    2.26912500
 C                  2.55200600    3.68681900    0.70852900
 C                  1.00652000    3.42338200    3.00113900
 H                  1.03719600    1.31846500    2.59247600
 C                  2.19866000    4.81213100    1.44569300
 H                  3.14658200    3.79643300   -0.19076200
 C                  1.42206400    4.68473300    2.58879500
 H                  0.39450900    3.31392800    3.88722200
 H                  2.52663000    5.79082700    1.11871700
 H                  1.13726200    5.56255800    3.15460700
106
e-16-1
 Au                 0.68104100    0.42370000   -0.09764000
 N                  2.54123800    1.07119000    0.26182100
 C                  4.38299900    2.32742600    0.82311300
 C                  0.36789900   -3.10260200    0.35703900
 N                 -1.11117800   -1.61461600   -0.93030100
 C                 -2.43619000   -2.17294500   -1.32526000
 C                  1.38427400   -4.05667200    0.36056300
 H                  1.63737000   -4.54394200    1.29469900
 C                  2.93259900    4.69077900    0.96612900
 H                  2.38460400    5.62401700    1.02128800
 C                 -1.10078900   -0.37185600   -0.50977600
 C                  3.63825100    0.23796800    0.31062200
 C                  0.82354100   -2.06127300    2.56983400
 H                  1.23235900   -1.16358300    2.10022800
 H                  1.65166500   -2.75051700    2.75420300
 H                  0.39215400   -1.77941800    3.53337100
 C                  0.82205300   -2.71495100   -2.01760900
 C                  2.09306300   -4.36749300   -0.78752800
 H                  2.87699200   -5.11378800   -0.75914700
 C                  2.98954400    2.33736200    0.56845900
 C                  0.05179300   -2.48563500   -0.86718600
 C                 -2.56562000    0.13863100   -0.37899300
 C                  1.93109000   -0.94587300   -3.35830000
 H                  2.03902800   -0.33250600   -2.46055600
 H                  1.84171600   -0.28550100   -4.22408700
 H                  2.84638700   -1.53331200   -3.46943400
 C                  6.02672100    0.29139800    0.75521700
 H                  6.92865300    0.83376700    1.01718700
 C                  3.68690600   -1.13755400    0.07283800
 H                  2.78353300   -1.67986700   -0.18872300
 C                 -0.24392300   -2.72604700    1.69417500
 H                 -1.04172800   -1.99658700    1.53741100
 C                  0.71321100   -1.87068400   -3.26873500
 H                 -0.16996700   -1.24199600   -3.17520600
 C                  4.80570300    0.95871000    0.65324300
 C                  2.26060100    3.52711500    0.63459100
 H                  1.19731200    3.53130400    0.41685500
 C                 -3.31245900   -0.91107000   -1.23838900
 H                 -4.31882300   -1.12843000   -0.90680800
 H                 -3.41066100   -0.49209800   -2.24124800
 C                  5.03853900    3.51288300    1.15443900
 H                  6.10511700    3.51316500    1.35107400
 C                 -0.82084000   -3.93001100    2.44012800
 H                 -1.51335700   -4.51057000    1.82925500
 H                 -1.35272700   -3.58768300    3.33172400
 H                 -0.02294300   -4.60006100    2.76904700
 C                  4.90864300   -1.77850000    0.17907800
 H                  4.96365300   -2.84653900   -0.00311300
 C                  1.83154800   -3.67332200   -1.95622900
 H                  2.43813500   -3.85146700   -2.83624300
 C                  4.31110800    4.68909400    1.22757600
 H                  4.80678900    5.61724000    1.48342800
 C                  0.59928800   -2.69468200   -4.54953400
 H                 -0.22460600   -3.40869400   -4.51485000
 H                  1.51945700   -3.25312300   -4.73419800
 H                  0.44572100   -2.03370100   -5.40479800
 C                 -2.78896800   -3.33093200   -0.39993400
 H                 -2.06151100   -4.13428000   -0.53695200
 H                 -3.77210600   -3.72330600   -0.66544700
 H                 -2.78555200   -3.04106100    0.64847800
 C                  6.07394500   -1.07290800    0.51775200
 H                  7.01586000   -1.60192300    0.59346100
 C                 -2.41505700   -2.72476300   -2.74546400
 H                 -2.15895400   -1.96547400   -3.48453300
 H                 -3.41204000   -3.10311400   -2.97960000
 H                 -1.71033000   -3.55444600   -2.82593200
 C                 -2.72888700   -0.00791900    1.16003200
 C                 -3.60355700   -0.91799300    1.80766000
 C                 -1.86139500    0.74860900    1.98811900
 C                 -3.37225400   -1.24160000    3.14575800
 C                 -1.67122600    0.37981300    3.31788600
 C                 -2.36196900   -0.66813700    3.90350600
 H                 -4.03615900   -1.95968100    3.61857700
 H                 -0.95874400    0.94743100    3.90880900
 C                 -2.80480900    1.56107100   -0.91695300
 C                 -2.11788800    2.01724500   -2.06155100
 C                 -3.71370500    2.44719400   -0.30303100
 C                 -2.24291500    3.34286600   -2.46953400
 C                 -3.80632200    3.76300000   -0.75255800
 C                 -3.05352900    4.25163600   -1.80854300
 H                 -1.68981400    3.66477200   -3.34691300
 H                 -4.50784900    4.42607800   -0.25489300
 C                 -1.25554100    1.14940000   -2.94099900
 H                 -0.22822800    1.07373800   -2.57566900
 H                 -1.64631200    0.13726500   -3.03193000
 H                 -1.21958300    1.57514300   -3.94426700
 C                 -3.12904400    5.69000900   -2.23016300
 H                 -4.09458700    6.12648700   -1.97330600
 H                 -2.35703600    6.27929500   -1.73027100
 H                 -2.97609300    5.79531000   -3.30461800
 C                 -4.65473000    2.08523200    0.81810400
 H                 -5.11341000    1.11159800    0.66807900
 H                 -4.16836700    2.06770600    1.79536700
 H                 -5.45597800    2.82334100    0.85822900
 C                 -2.07216300   -1.12456600    5.30221100
 H                 -2.97131500   -1.49961600    5.79224100
 H                 -1.33935300   -1.93727500    5.29671300
 H                 -1.65728900   -0.31661600    5.90495900
 C                 -1.22315000    2.06518700    1.60955100
 H                 -0.27277300    2.18863400    2.13169200
 H                 -1.05050900    2.21607000    0.54834200
 H                 -1.89161300    2.86993200    1.93835300
 C                 -4.90467700   -1.49031800    1.27220800
 H                 -5.47182700   -0.77087200    0.68410900
 H                 -4.79940900   -2.38990400    0.67047600
 H                 -5.52786200   -1.75363400    2.12660900
112
e-17-1
 Au                -1.03498800    0.04267300   -0.07737100
 N                 -2.87292200    0.36705800   -0.80410700
 C                 -4.81702100    1.35596600   -1.52625300
 C                  0.22519500   -3.41152500    0.03864600
 N                  0.86481000   -1.48291200    1.41139800
 C                  2.08810300   -1.60727200    2.25839100
 C                 -0.53511600   -4.56944300   -0.11363000
 H                 -0.37001700   -5.19239300   -0.98504800
 C                 -3.82941600    3.92952000   -1.16697400
 H                 -3.46570500    4.94023800   -1.02394600
 C                  0.70289300   -0.33457300    0.80047600
 C                 -3.77875100   -0.62682200   -1.10105600
 C                  0.32569500   -2.68507400   -2.33740800
 H                 -0.35503200   -1.85136800   -2.14159300
 H                 -0.27508700   -3.54485800   -2.64552200
 H                  0.98424300   -2.41158700   -3.16546200
 C                 -1.05654500   -2.89947300    2.06132300
 C                 -1.51013000   -4.92044000    0.80492700
 H                 -2.08461100   -5.82839300    0.67111200
 C                 -3.50013800    1.56663000   -1.04619300
 C                 -0.00488800   -2.61732100    1.17649000
 C                  1.98894200    0.50963500    0.97514700
 C                 -2.94183600   -1.44395900    2.76441200
 H                 -2.94977700   -0.90843400    1.81253200
 H                 -3.32641600   -0.78104400    3.54371500
 H                 -3.63231200   -2.28618100    2.67985400
 C                 -6.05168900   -0.92006800   -1.91160400
 H                 -6.99105300   -0.50952600   -2.26573900
 C                 -3.61043600   -2.01030800   -0.98647400
 H                 -2.67061400   -2.42317300   -0.62582900
 C                  1.15661400   -3.02522000   -1.09627600
 H                  1.71095800   -2.12660800   -0.81989500
 C                 -1.53723500   -1.93844400    3.13027700
 H                 -0.86334600   -1.07666000    3.14134500
 C                 -4.99863200   -0.07511400   -1.55941300
 C                 -3.00556600    2.86100600   -0.85553300
 H                 -2.00423300    3.01413600   -0.45907700
 C                  2.56410700   -0.15013100    2.24747600
 H                  3.63453600   -0.04248900    2.36508100
 H                  2.07103100    0.35526600    3.08120700
 C                 -5.62632200    2.44912100   -1.83382900
 H                 -6.63491600    2.29834800   -2.20312200
 C                  2.16184500   -4.12286900   -1.44282000
 H                  2.74445200   -4.43970700   -0.57605000
 H                  2.85079300   -3.75449500   -2.20844400
 H                  1.65773600   -5.00274800   -1.84966700
 C                 -4.67136700   -2.82666400   -1.33674200
 H                 -4.56292900   -3.90230300   -1.25325200
 C                 -1.78261100   -4.07268100    1.86445100
 H                 -2.59600900   -4.30508300    2.54176600
 C                 -5.12903600    3.73025800   -1.65711900
 H                 -5.74799600    4.58759400   -1.89057500
 C                 -1.58302000   -2.57046700    4.52153700
 H                 -0.63112300   -3.01127200    4.81669600
 H                 -2.34144200   -3.35620400    4.55653700
 H                 -1.85955400   -1.81925500    5.26445500
 C                  3.02915600   -2.65774500    1.67900700
 H                  2.57046300   -3.64552000    1.77451400
 H                  3.96141300   -2.65566600    2.24690700
 H                  3.25732900   -2.49021800    0.62923500
 C                 -5.88410600   -2.29048100   -1.79888900
 H                 -6.69412700   -2.95741700   -2.06699600
 C                  1.73099300   -2.04064600    3.67274300
 H                  1.04383500   -1.33754100    4.14396900
 H                  2.64755600   -2.07540700    4.26522800
 H                  1.28771000   -3.03855300    3.67397100
 C                  2.70474600    0.20515400   -0.36036100
 C                  3.93994700   -0.44325100   -0.49967300
 C                  2.07740000    0.56269700   -1.57762900
 C                  4.37064400   -0.97614300   -1.72029600
 C                  2.48835500    0.05306600   -2.80324200
 C                  3.60167200   -0.77271700   -2.85876600
 H                  5.29645500   -1.52578700   -1.77444800
 H                  1.96086500    0.27199300   -3.71947200
 C                  1.73284400    1.99174300    1.18473300
 C                  0.60321200    2.43976200    1.89134400
 C                  2.55290000    2.97468100    0.64150400
 C                  0.23252800    3.77549200    1.90651600
 C                  2.21566200    4.32931500    0.65220300
 C                  1.03430400    4.71803700    1.26479200
 H                 -0.65507600    4.12319100    2.41380300
 H                  2.89233000    5.04330300    0.20480200
 O                  0.60115000    5.99910700    1.32319900
 O                  3.73352700    2.58061000    0.09465800
 O                 -0.09627200    1.49472000    2.57078400
 O                  3.89416500   -1.30708700   -4.06691900
 O                  1.08282600    1.46761300   -1.50260600
 O                  4.73846100   -0.53077900    0.59185500
 C                  5.02350400   -2.14046600   -4.16918500
 H                  4.94436100   -2.99869100   -3.49406700
 H                  5.05867500   -2.49357400   -5.19613800
 H                  5.94379200   -1.59254200   -3.94506700
 C                  5.91530400   -1.29615100    0.53017800
 H                  6.34884000   -1.27505000    1.52757400
 H                  5.70261300   -2.33417700    0.25188600
 H                  6.63167600   -0.87242400   -0.17906600
 C                  4.09476100    3.12142500   -1.15861100
 H                  3.20613400    3.31309900   -1.76668500
 H                  4.66486200    4.04774400   -1.04684000
 H                  4.71526800    2.37644900   -1.65924900
 C                  1.37497200    6.98492700    0.68505400
 H                  1.47901600    6.77571000   -0.38391700
 H                  0.85105500    7.92777400    0.81756100
 H                  2.37081800    7.05973000    1.13256900
 C                 -1.41226900    1.81936100    2.97485000
 H                 -1.40765100    2.59584700    3.74372500
 H                 -2.00982400    2.14755700    2.11799500
 H                 -1.84567200    0.91305100    3.38627000
 C                  0.25865100    1.67811800   -2.63332600
 H                 -0.16760000    0.73322500   -2.98399100
 H                 -0.54912100    2.33060700   -2.31053000
 H                  0.81950000    2.15511300   -3.44216700
88
e-18-1
 Au                 0.71088900    0.34163100   -0.01111400
 N                  2.58180700    0.90207900    0.39932900
 C                  4.49479200    2.08389900    0.87516000
 C                  0.09000700   -3.17826800    0.52188700
 N                 -1.20070800   -1.61365400   -0.85834800
 C                 -2.55918800   -2.04342300   -1.30611700
 C                  1.05102400   -4.18453000    0.59849300
 H                  1.22997400   -4.66550300    1.55299800
 C                  3.15472700    4.51193200    1.01521300
 H                  2.65004100    5.46896000    1.07480700
 C                 -1.07306000   -0.36822600   -0.48131100
 C                  3.63948200    0.01776400    0.44383200
 C                  0.47404000   -2.10391800    2.73798100
 H                  1.00498500   -1.28109500    2.25375000
 H                  1.21398800   -2.85071700    3.03638200
 H                 -0.00756000   -1.72382800    3.64247300
 C                  0.69081700   -2.85872400   -1.83497400
 C                  1.79931900   -4.55372800   -0.50745900
 H                  2.53930900   -5.33978300   -0.42499300
 C                  3.09714600    2.15335200    0.66255600
 C                 -0.12132500   -2.57285100   -0.72855100
 C                 -2.47523500    0.28908600   -0.47295300
 C                  1.98175700   -1.21471700   -3.17743400
 H                  2.10360300   -0.57121600   -2.30367000
 H                  1.97980800   -0.58848300   -4.07189200
 H                  2.84952500   -1.87775200   -3.22627700
 C                  6.03912200   -0.02938100    0.81971900
 H                  6.97277300    0.47662600    1.03968700
 C                  3.61524800   -1.36555200    0.25191100
 H                  2.67931300   -1.87397600    0.03815200
 C                 -0.57349900   -2.72723800    1.81022400
 H                 -1.30597900   -1.94953200    1.58163100
 C                  0.68779500   -2.03137600   -3.10396500
 H                 -0.14098000   -1.32477500   -3.05384600
 C                  4.84839500    0.69194200    0.73174800
 C                  2.42137900    3.37294500    0.73288200
 H                  1.34889700    3.41324500    0.56989000
 C                 -3.27101400   -0.68525600   -1.37222500
 H                 -4.32883900   -0.74523600   -1.14622900
 H                 -3.17335000   -0.31337800   -2.39324900
 C                  5.21328200    3.24546900    1.15766000
 H                  6.28441400    3.20214400    1.32173400
 C                 -1.28328300   -3.86680300    2.54096200
 H                 -1.98970500   -4.39746000    1.90171300
 H                 -1.82534400   -3.47268300    3.40413000
 H                 -0.55861300   -4.59411000    2.91404100
 C                  4.80859500   -2.06057500    0.34288100
 H                  4.80818800   -3.13539300    0.19616700
 C                  1.63835200   -3.87194200   -1.70214100
 H                  2.27984100   -4.10342300   -2.54423400
 C                  4.54088400    4.45410400    1.22634400
 H                  5.08524200    5.36433200    1.44482300
 C                  0.54732200   -2.88008700   -4.36642600
 H                 -0.33212400   -3.52485100   -4.34159700
 H                  1.42485500   -3.51614700   -4.50208700
 H                  0.47656800   -2.23445600   -5.24377300
 C                 -3.12851800   -3.06795800   -0.33267800
 H                 -2.54882400   -3.99123700   -0.40338400
 H                 -4.16219400   -3.28652100   -0.60190000
 H                 -3.10428900   -2.73239000    0.70041900
 C                  6.01519200   -1.40103600    0.62348900
 H                  6.93310700   -1.97184600    0.68910500
 C                 -2.51137600   -2.68844500   -2.68394400
 H                 -2.12305700   -2.00359500   -3.43785100
 H                 -3.52706900   -2.97239400   -2.96585800
 H                 -1.89900100   -3.59185500   -2.66706500
 C                 -2.82136900    0.27456000    1.02396500
 C                 -3.81848700   -0.47840600    1.64433600
 C                 -2.03940300    1.00963200    1.92800100
 C                 -3.92482800   -0.65254400    3.01419500
 C                 -2.09038600    0.88229400    3.30075000
 C                 -3.02607100    0.01076100    3.82321300
 H                 -4.71096200   -1.27002500    3.42389100
 H                 -1.43386900    1.46541000    3.92990300
 C                 -2.45908600    1.68112800   -1.08228000
 C                 -1.72633200    1.92854800   -2.24294700
 C                 -3.17000700    2.78056300   -0.60844200
 C                 -1.63298000    3.15481900   -2.86815400
 C                 -3.12528400    4.03664500   -1.18519300
 C                 -2.34049500    4.20150400   -2.30860800
 H                 -1.03394100    3.28141200   -3.75782500
 H                 -3.69063900    4.85481900   -0.76357800
 F                 -2.27763000    5.40164400   -2.88113300
 F                 -1.09111000    0.89756900   -2.81885400
 F                 -3.95889100    2.64177900    0.46161500
 F                 -4.77875300   -1.07003900    0.92141200
 F                 -1.22476800    1.94768700    1.44824100
 F                 -3.09781700   -0.15274100    5.14151500
88
e-19-1
 Au                 0.93412300    0.44504800    0.00430300
 N                  2.67395500    1.25127400    0.57061600
 C                  4.32475000    2.61832300    1.40169400
 C                  1.09725900   -3.13133500   -0.28515600
 N                 -0.51497300   -1.60513800   -1.35091900
 C                 -1.73434900   -2.21389700   -1.96066100
 C                  2.23872600   -3.92335800   -0.39996700
 H                  2.51988400   -4.55558700    0.43379500
 C                  2.57119900    4.71206800    1.90004700
 H                  1.90306900    5.54221300    2.09654000
 C                 -0.67970800   -0.48512000   -0.68995200
 C                  3.87341700    0.57334300    0.50832700
 C                  1.31075500   -2.52686700    2.12160500
 H                  1.61060700   -1.50563700    1.87439100
 H                  2.21847900   -3.12767600    2.21717100
 H                  0.80892200   -2.52054100    3.09275800
 C                  1.59024500   -2.20762700   -2.49982100
 C                  3.03314800   -3.89316100   -1.53336600
 H                  3.91474600   -4.51833600   -1.59743000
 C                  2.94561800    2.49184400    1.10632900
 C                  0.75019500   -2.32214100   -1.38178200
 C                 -2.21364300   -0.20235200   -0.57588900
 C                  2.45401300   -0.05252200   -3.37946500
 H                  2.39974300    0.39119900   -2.38268100
 H                  2.31070600    0.73777300   -4.12037000
 H                  3.45966500   -0.46202300   -3.50680100
 C                  6.22831300    0.86027100    1.03451400
 H                  7.04574800    1.46107200    1.41793900
 C                  4.11066200   -0.71813800    0.03248400
 H                  3.29214900   -1.31866400   -0.35225500
 C                  0.38483300   -3.12220400    1.05521600
 H                 -0.49615900   -2.47986100    0.98630700
 C                  1.40497800   -1.15235100   -3.56836700
 H                  0.42367300   -0.70275000   -3.42788000
 C                  4.92932700    1.36824400    1.01049700
 C                  2.06462600    3.54710500    1.35108100
 H                  1.01297800    3.45029200    1.10172300
 C                 -2.74905800   -1.08742400   -1.72194100
 H                 -3.76607000   -1.43454800   -1.59227100
 H                 -2.73689900   -0.45164400   -2.61030900
 C                  4.81303000    3.80192800    1.95426500
 H                  5.86791100    3.90571400    2.18363000
 C                 -0.05890800   -4.51639600    1.49916900
 H                 -0.67000200   -5.02079900    0.74941700
 H                 -0.63331500   -4.44382300    2.42674600
 H                  0.80779900   -5.14880200    1.70401600
 C                  5.40714000   -1.20124000    0.06449200
 H                  5.60830700   -2.20225800   -0.30214600
 C                  2.72379900   -3.01512400   -2.55785300
 H                  3.38571700   -2.92746900   -3.41105100
 C                  3.93461500    4.84294100    2.20400100
 H                  4.29928500    5.76809700    2.63247900
 C                  1.49041700   -1.70737000   -4.98858600
 H                  0.80558400   -2.54048800   -5.15302500
 H                  2.50161400   -2.05534800   -5.20958500
 H                  1.25534500   -0.92173300   -5.70917900
 C                 -2.00570400   -3.56453500   -1.31002600
 H                 -1.20951000   -4.25912700   -1.58824300
 H                 -2.95350800   -3.96209900   -1.67284400
 H                 -2.04272700   -3.51094200   -0.22542800
 C                  6.46252500   -0.42109700    0.56183400
 H                  7.46663400   -0.82643400    0.57489500
 C                 -1.56545900   -2.45710300   -3.45496000
 H                 -1.38690500   -1.53241900   -4.00405800
 H                 -2.48637300   -2.90682900   -3.83116600
 H                 -0.74765400   -3.15483000   -3.64227100
 C                 -2.44176000   -0.68206100    0.88117800
 C                 -3.14908600   -1.82926200    1.29314800
 C                 -1.76927600   -0.03057500    1.93961800
 C                 -2.94164600   -2.43911400    2.52309600
 C                 -1.54474300   -0.61744700    3.17544300
 C                 -2.07551300   -1.86610100    3.43409000
 H                 -3.48117100   -3.34395200    2.76619500
 H                 -0.96529700   -0.08952600    3.91983100
 C                 -2.64280600    1.24421800   -0.82062600
 C                 -1.97256500    2.08982400   -1.71629100
 C                 -3.77345400    1.81784700   -0.22167000
 C                 -2.27825400    3.43288300   -1.87340000
 C                 -4.11260800    3.15484300   -0.36316800
 C                 -3.33605200    3.96964100   -1.16441700
 H                 -1.70317800    4.03881200   -2.55910400
 H                 -4.98165200    3.54458000    0.14755800
 Cl                -0.75537500    1.49492400   -2.78369500
 Cl                -3.72309100    5.63333800   -1.32746800
 Cl                -4.87805500    0.88745800    0.71986700
 Cl                -1.27112800    1.61509800    1.83599500
 Cl                -1.73121600   -2.66545000    4.91172600
 Cl                -4.47411700   -2.52029500    0.41924200
100
e-20-1
 Au                -1.02929500    0.39667700   -0.11513600
 N                 -2.38099900    1.11286600   -1.38775700
 C                 -3.46100100    2.05561900   -3.18286900
 C                 -2.07580100   -2.66692100    1.45240100
 N                 -0.21278100   -1.22614400    2.13269000
 C                  0.83525500   -1.79694200    3.03320200
 C                 -3.39721000   -3.06732500    1.63995200
 H                 -3.78631100   -3.88475700    1.04440300
 C                 -1.11382700    3.05491200   -4.28082100
 H                 -0.20838100    3.44881100   -4.72635700
 C                  0.20447800   -0.44560800    1.17350800
 C                 -3.72798000    0.83003500   -1.28084700
 C                 -1.92265100   -3.01392700   -1.01664700
 H                 -2.05966500   -1.94240500   -1.17700100
 H                 -2.90359100   -3.49025800   -1.08678800
 H                 -1.29841900   -3.40557500   -1.82379100
 C                 -2.44803700   -0.86849700    3.08508800
 C                 -4.22585700   -2.41853500    2.54155600
 H                 -5.24913000   -2.74780700    2.67037600
 C                 -2.21626100    1.84715900   -2.54414600
 C                 -1.60531100   -1.60495300    2.24196200
 C                  1.73321000   -0.42058900    1.17713200
 C                 -2.79240600    1.59293400    3.02022200
 H                 -2.61225500    1.59604000    1.94242800
 H                 -2.47591100    2.55516000    3.42797400
 H                 -3.86945700    1.49270300    3.17657500
 C                 -5.82692300    1.21712300   -2.43818600
 H                 -6.38950000    1.64490600   -3.26058600
 C                 -4.37727900    0.08847100   -0.29160100
 H                 -3.81452600   -0.34859000    0.52928900
 C                 -1.27468700   -3.31728900    0.33867900
 H                 -0.27128300   -2.88268900    0.32120300
 C                 -2.04505100    0.45030300    3.71460900
 H                 -0.97700500    0.60616800    3.54193100
 C                 -4.44574800    1.39323300   -2.36004500
 C                 -1.03560300    2.34674500   -3.09474400
 H                 -0.08365500    2.18033900   -2.59882900
 C                  2.07435500   -1.01944000    2.55712500
 H                  2.97772400   -1.62832700    2.56099000
 H                  2.24854400   -0.18982900    3.24537600
 C                 -3.51707400    2.77534000   -4.37594100
 H                 -4.46638100    2.94094400   -4.87315300
 C                 -1.14991300   -4.83160100    0.50698300
 H                 -0.74765000   -5.11643300    1.47941800
 H                 -0.49557000   -5.23903100   -0.26706700
 H                 -2.12654600   -5.30842000    0.39638400
 C                 -5.74818100   -0.07655600   -0.39167000
 H                 -6.27004400   -0.65066800    0.36628100
 C                 -3.76112500   -1.31075300    3.23241000
 H                 -4.43452700   -0.75570900    3.87480900
 C                 -2.34403100    3.27196700   -4.91921100
 H                 -2.37168700    3.83112100   -5.84595400
 C                 -2.30753100    0.49548900    5.21818600
 H                 -1.82293900   -0.32542700    5.74869500
 H                 -3.37879900    0.44026400    5.42261500
 H                 -1.94531800    1.43755100    5.63343400
 C                  0.91099400   -3.31011500    2.86985900
 H                 -0.01610800   -3.76362500    3.22679800
 H                  1.73145400   -3.69201700    3.48001300
 H                  1.06747900   -3.62410100    1.84030400
 C                 -6.47216500    0.48455200   -1.45418800
 H                 -7.54407500    0.33986100   -1.50486700
 C                  0.52321200   -1.49941100    4.49296600
 H                  0.49217300   -0.42801600    4.69212600
 H                  1.30598300   -1.94004300    5.11279000
 H                 -0.43053700   -1.94559000    4.78149200
 C                  2.08755100   -1.29033900   -0.02704200
 C                  2.64282500   -2.55618400    0.08033400
 C                  1.71369900   -0.84371700   -1.29862400
 C                  2.74883500   -3.38149500   -1.03641700
 H                  2.98658700   -2.93934000    1.03209100
 C                  1.81783900   -1.67084400   -2.40271400
 H                  1.31756500    0.15924000   -1.42428400
 C                  2.32164800   -2.96050200   -2.28283500
 H                  2.38885800   -3.61154100   -3.14327700
 C                  2.25178900    1.00047000    1.04934100
 C                  1.56425900    2.02726200    1.70179500
 C                  3.41686600    1.30524200    0.36610600
 C                  2.03773900    3.32402400    1.66106500
 H                  0.64557800    1.81008900    2.23776500
 C                  3.88816100    2.61663500    0.33252700
 H                  3.96962700    0.52863200   -0.15138500
 C                  3.20715500    3.63384000    0.97176400
 H                  3.57269500    4.65196300    0.93895400
 C                  1.29893600    4.43887700    2.35284900
 C                  5.16450100    2.88592200   -0.41894500
 C                  3.30555800   -4.76185200   -0.82272300
 C                  1.30448800   -1.15087700   -3.72203700
 F                  4.55100900   -4.71830600   -0.33521600
 F                  2.56889600   -5.43802200    0.07493700
 F                  3.33206000   -5.48015000   -1.94241500
 F                  1.64182800   -1.95129600   -4.73565200
 F                  1.78998900    0.06570500   -3.98350500
 F                 -0.02637800   -1.05298500   -3.70772100
 F                  2.09683300    5.08049700    3.21586700
 F                  0.24386500    3.99255900    3.03950700
 F                  0.85959500    5.34856800    1.48074600
 F                  5.49881500    4.17537300   -0.40130100
 F                  5.06260300    2.50866200   -1.69769200
 F                  6.18595300    2.19612400    0.10620600
88
f-1-1
 Au                -0.10132700    1.51343000   -0.44816000
 N                 -0.17677800    3.25427900    0.51612000
 C                 -0.26303800    5.47897100    1.08722000
 C                 -1.10834700   -1.47836900    1.52086600
 N                  0.10804100   -1.39599900   -0.62447500
 C                  0.19645600   -2.64484300   -1.46119900
 C                 -1.08203900   -1.47851700    2.91646200
 H                 -2.02414200   -1.52007400    3.44925500
 C                 -0.29674600    6.32863700   -1.55474300
 H                 -0.31026100    6.67947800   -2.57965900
 C                 -0.00243100   -0.27310800   -1.29662500
 C                 -0.17853900    3.35033200    1.89338800
 C                  1.32290900   -1.33383300    1.51500800
 C                  0.11200500   -1.39585800    3.61175700
 C                 -0.22708500    4.54402600    0.02654100
 C                  0.10516300   -1.40325100    0.81976200
 C                 -0.24205900    5.01404700    3.66225700
 H                 -0.28259600    6.04766100    3.98752800
 C                 -0.13564400    2.31759900    2.83175500
 H                 -0.09372000    1.28220000    2.50466200
 C                 -0.23145900    4.70170200    2.30309000
 C                 -0.24375200    4.96929100   -1.30234900
 H                 -0.21519500    4.24502800   -2.11008400
 C                  0.41604400   -2.03562900   -2.85257500
 H                 -0.11990200   -2.59426500   -3.62173900
 H                  1.48332900   -2.06859200   -3.09153100
 C                 -0.31639900    6.84467900    0.80993500
 H                 -0.34434000    7.56805100    1.61726700
 C                 -0.14701200    2.64981400    4.17528800
 H                 -0.11442300    1.86092800    4.91908600
 C                  1.30337400   -1.32769300    2.91043800
 H                  2.24517500   -1.24901400    3.43950500
 C                 -0.33315800    7.26373500   -0.50952400
 H                 -0.37438900    8.32060000   -0.74108700
 C                 -1.08952600   -3.45602200   -1.35180400
 H                 -1.20865200   -3.85629400   -0.34290800
 H                 -1.02667500   -4.29958000   -2.04058200
 H                 -1.97524400   -2.86951700   -1.60046200
 C                 -0.19993200    3.98807800    4.59273400
 H                 -0.20761800    4.21760900    5.65085400
 C                  1.36406800   -3.52466200   -1.04177500
 H                  2.32033800   -3.02084600   -1.18632600
 H                  1.35524400   -4.42234600   -1.66216000
 H                  1.27494500   -3.83725900    0.00171900
 C                 -0.03542200   -0.57017200   -2.77108000
 C                 -1.47564200   -0.35999700   -3.25244000
 H                 -1.80457500    0.65941500   -3.03910700
 H                 -1.51964400   -0.52153600   -4.33156200
 H                 -2.17155600   -1.05164900   -2.77500800
 C                  0.89179400    0.37234000   -3.53041100
 H                  0.90011100    0.10648800   -4.58975900
 H                  0.55170900    1.40530800   -3.43108900
 H                  1.91416700    0.31077300   -3.15287500
 C                  2.65273800   -1.33996900    0.85192500
 C                  3.56830700   -2.31512700    1.23610200
 C                  3.02810700   -0.42127900   -0.13019600
 C                  4.81241800   -2.40231900    0.62482900
 H                  3.29577400   -3.03651600    1.99906100
 C                  4.27381100   -0.51618700   -0.73011900
 H                  2.35753300    0.38489900   -0.40434100
 C                  5.17426400   -1.51259000   -0.37073100
 H                  6.14357600   -1.57780600   -0.84693900
 C                 -2.44114300   -1.60934100    0.87264200
 C                 -3.21331300   -2.72704800    1.17098900
 C                 -2.96460100   -0.64624300    0.00932500
 C                 -4.45679800   -2.90929200    0.57850500
 H                 -2.82827400   -3.48011900    1.85069200
 C                 -4.20985300   -0.83331100   -0.56790500
 H                 -2.40409800    0.25757900   -0.19852400
 C                 -4.96371800   -1.97102400   -0.30256200
 H                 -5.93308700   -2.10967800   -0.76359200
 C                 -5.21643500   -4.16725300    0.90196900
 C                 -4.77895000    0.18697000   -1.51942900
 F                 -6.42540900   -4.18615100    0.34317400
 F                 -4.55577000   -5.25112100    0.47063000
 F                 -5.37459600   -4.31442200    2.22191700
 F                 -4.85034400   -0.30935600   -2.76513700
 F                 -4.04416100    1.29533700   -1.57328900
 F                 -6.02174800    0.53389100   -1.17374200
 C                  5.73606400   -3.51140400    1.05144100
 C                  4.66829400    0.44423800   -1.82146600
 F                  5.23773700   -4.70884800    0.71371300
 F                  5.90037400   -3.52376300    2.37856600
 F                  6.94122200   -3.40756300    0.49328300
 F                  5.94426900    0.81863400   -1.70920700
 F                  3.91601600    1.54271300   -1.82387000
 F                  4.53824800   -0.13020600   -3.02986200
 H                  0.11330900   -1.37284600    4.69344800
94
f-2-1
 Au                -0.60256000    0.88291700   -0.60111600
 N                 -1.70008400    2.41159600    0.07438000
 C                 -3.34725600    3.98726200    0.37525900
 C                 -0.20013100   -1.56027200    1.95001400
 N                  1.01596000   -1.50739900   -0.20504300
 C                  1.73936700   -2.70266000   -0.77643500
 C                 -0.21757000   -1.33408700    3.32534300
 H                 -1.12121700   -1.57097500    3.87311200
 C                 -3.97270500    4.09004400   -2.32635200
 H                 -4.23296500    4.14285100   -3.37668500
 C                  0.44345000   -0.72359000   -1.08741600
 C                 -1.77942800    2.70686400    1.41980400
 C                  2.03138500   -0.59914500    1.85807600
 C                  0.87651600   -0.79252100    3.97921700
 C                 -2.65245100    3.18512500   -0.55921800
 C                  0.95322100   -1.23239400    1.21620600
 C                 -3.03266700    4.09515200    2.97045100
 H                 -3.80015400    4.83461900    3.17009400
 C                 -1.02530900    2.17374400    2.46885100
 H                 -0.23770600    1.45008700    2.26944400
 C                 -2.78362500    3.67213600    1.66598300
 C                 -2.96707200    3.23272400   -1.91762000
 H                 -2.43330200    2.60647400   -2.62504700
 C                  1.42113300   -2.57326700   -2.27552400
 H                  0.78256000   -3.39896500   -2.59353300
 H                  2.33986000   -2.62886300   -2.86239400
 C                 -4.35782700    4.84498200   -0.05883200
 H                 -4.89597800    5.46344400    0.65085500
 C                 -1.29551200    2.60350600    3.75785300
 H                 -0.71851400    2.20161100    4.58373100
 C                  1.98216400   -0.41134600    3.24077900
 H                  2.81679100    0.08374100    3.72234800
 C                 -4.66485600    4.89388000   -1.40770500
 H                 -5.44668000    5.55438600   -1.76092300
 C                  1.18492900   -3.99180600   -0.19651200
 H                  1.25396700   -4.00186400    0.89450000
 H                  1.77106500   -4.82839400   -0.57990200
 H                  0.14868200   -4.13776200   -0.50118800
 C                 -2.29130600    3.55709500    4.01139000
 H                 -2.47755600    3.87711100    5.02881700
 C                  3.23678200   -2.63741800   -0.51245600
 H                  3.68130900   -1.72409600   -0.91376900
 H                  3.70171600   -3.49081400   -1.00849500
 H                  3.45908400   -2.70891000    0.55368900
 C                  0.71869400   -1.22085700   -2.47791300
 C                 -0.59151200   -1.33125500   -3.26783100
 C                  1.66864400   -0.18529100   -3.11503400
 H                  1.23481100    0.81138800   -2.98603500
 H                 -0.36670500   -1.79911600   -4.23051800
 C                 -1.67488800   -2.11360200   -2.53788400
 H                 -1.34002600   -3.11749600   -2.25808000
 H                 -1.97285000   -1.59388700   -1.62380500
 H                 -2.56444800   -2.22659800   -3.15756400
 H                 -0.94790400   -0.31620500   -3.47732300
 C                  1.96332200   -0.43713100   -4.58599300
 H                  1.08093300   -0.26657100   -5.20319700
 H                  2.74599600    0.23872200   -4.93091300
 H                  2.30429500   -1.46037700   -4.76237800
 H                  2.60458500   -0.19665000   -2.54344200
 H                  0.84793100   -0.62623400    5.04789400
 C                  3.21337100   -0.04491300    1.14946300
 C                  4.49319400   -0.39207100    1.56664500
 C                  3.07288600    0.86506200    0.10013100
 C                  5.61085200    0.11315600    0.91428400
 H                  4.62199000   -1.08993700    2.38749400
 C                  4.19459100    1.36889600   -0.53758200
 H                  2.08430400    1.18912900   -0.20663100
 C                  5.47435300    0.98892600   -0.14831600
 H                  6.34463500    1.38496800   -0.65530300
 C                 -1.48850800   -1.99673500    1.33426900
 C                 -1.79375100   -3.31599100    1.04016300
 C                 -2.47133200   -1.02166800    1.13593800
 C                 -3.02089200   -3.64426300    0.46960800
 H                 -1.08994400   -4.10487800    1.26974800
 C                 -3.68592000   -1.35789400    0.56163500
 H                 -2.28456600    0.00268500    1.44123400
 C                 -3.96836500   -2.67180700    0.20633500
 H                 -4.91398800   -2.92811600   -0.25209900
 C                  6.96743000   -0.34276100    1.37942300
 C                  4.05972100    2.33497500   -1.68612800
 C                 -3.25732700   -5.08514300    0.11677600
 C                 -4.66364300   -0.26306200    0.22104300
 F                 -3.12754800   -5.88300500    1.18347600
 F                 -4.46530200   -5.29459500   -0.40172900
 F                 -5.92614200   -0.70591400    0.24913400
 F                 -4.57096500    0.76697300    1.05600400
 F                 -2.35389800   -5.50946500   -0.78533600
 F                 -4.43606400    0.19455800   -1.01700900
 F                  7.12662800   -1.65877600    1.18089000
 F                  7.12865100   -0.13033800    2.69022800
 F                  7.95699700    0.28107700    0.74210700
 F                  4.84732500    3.40097300   -1.51949200
 F                  2.81102400    2.76808400   -1.83999000
 F                  4.43131100    1.76067100   -2.84295400
103
f-3-1
 Au                -0.56658900   -0.78730900    0.53667000
 N                 -1.59980900   -2.49483000    0.44396900
 C                 -3.22802000   -4.09744200    0.70256700
 C                  0.06715700    0.40033500   -2.65128700
 N                  1.16281100    1.23009300   -0.59665600
 C                  1.91490200    2.53241200   -0.50533500
 C                  0.12030100   -0.36531300   -3.81485100
 H                 -0.74576300   -0.37334100   -4.46504300
 C                 -4.11823400   -3.04498200    3.11087100
 H                 -4.48292100   -2.64643500    4.04995200
 C                  0.43274100    0.92558600    0.45819500
 C                 -1.55616300   -3.33888400   -0.64560200
 C                  2.26817700   -0.44177600   -2.04423300
 C                  1.23517500   -1.12716300   -4.12465900
 C                 -2.61727700   -2.95002600    1.25981100
 C                  1.17279800    0.39842100   -1.78084000
 C                 -2.67143200   -5.29467700   -1.55678700
 H                 -3.42348900   -6.07278300   -1.48842500
 C                 -0.70354500   -3.27845600   -1.75032200
 H                  0.06579900   -2.51225400   -1.80667900
 C                 -2.54186700   -4.34760800   -0.54230700
 C                 -3.06691400   -2.41595000    2.46805600
 H                 -2.60434000   -1.52417700    2.88112100
 C                  1.71941600    2.84667600    0.97379500
 H                  1.66525500    3.92143500    1.13620200
 H                  2.58336700    2.47007000    1.53505000
 C                 -4.28618600   -4.71590200    1.36773200
 H                 -4.76002700   -5.59588400    0.94719500
 C                 -0.85539100   -4.22533800   -2.74993400
 H                 -0.20093300   -4.19559900   -3.61445100
 C                  2.28865700   -1.17857700   -3.22974400
 H                  3.13257100   -1.83137900   -3.41743000
 C                 -4.72471500   -4.18889900    2.57044800
 H                 -5.54519600   -4.65725500    3.09930000
 C                  1.30911200    3.58732200   -1.42050800
 H                  1.33355400    3.25307200   -2.46086500
 H                  1.91136000    4.49402900   -1.34918700
 H                  0.28802700    3.83975500   -1.14108600
 C                 -1.83100000   -5.22815800   -2.65760700
 H                 -1.92396100   -5.95734000   -3.45255600
 C                  3.39137400    2.40506000   -0.85165400
 H                  3.91478900    1.72556600   -0.17973500
 H                  3.83910200    3.39435900   -0.74220700
 H                  3.54051100    2.08501700   -1.88543300
 C                  3.39537300   -0.62438800   -1.09847600
 C                  4.70486400   -0.54812100   -1.55846800
 C                  3.17490700   -0.86628500    0.25919900
 C                  5.77141000   -0.65194200   -0.67362400
 H                  4.89894200   -0.36029100   -2.60920000
 C                  4.24445200   -0.95370200    1.13304700
 H                  2.16388400   -0.99244900    0.62862700
 C                  5.55451900   -0.83674500    0.68052500
 H                  6.38496800   -0.90239400    1.37092800
 C                 -1.24504200    1.03258800   -2.32149800
 C                 -1.52816900    2.37902500   -2.47607100
 C                 -2.26490300    0.18068000   -1.87837200
 C                 -2.76935500    2.88630300   -2.09424200
 H                 -0.79703200    3.04813400   -2.90687600
 C                 -3.49411800    0.69401400   -1.50364900
 H                 -2.08831600   -0.88929200   -1.83342100
 C                 -3.75155800    2.05863800   -1.58389100
 H                 -4.70996600    2.45729600   -1.27848200
 C                 -2.98264000    4.36866100   -2.21094800
 C                 -4.54133000   -0.21995100   -0.92142600
 F                 -4.23554700    4.72929800   -1.94245100
 F                 -2.18418900    5.03610900   -1.35616700
 F                 -2.68116800    4.81706200   -3.43479400
 F                 -5.77268500    0.15390200   -1.29261400
 F                 -4.51056500   -0.18066100    0.41658500
 F                 -4.36701600   -1.48305100   -1.29514800
 C                  7.16445500   -0.52796600   -1.22968400
 C                  4.00120300   -1.11048500    2.61066900
 F                  7.33303600    0.64794800   -1.84955000
 F                  7.41120600   -1.47925600   -2.13738500
 F                  8.09721100   -0.62040700   -0.28281600
 F                  4.86301500   -1.96408100    3.16729000
 F                  2.76823100   -1.53621400    2.87867800
 F                  4.15996900    0.06677200    3.24102800
 H                  1.25944100   -1.71500900   -5.03264200
 C                  0.47735700    2.06877600    1.44645000
 C                 -0.85870000    2.86433900    1.32903900
 C                  0.63433900    1.65843000    2.92633300
 H                 -1.03766300    3.11967600    0.28000000
 C                 -0.77058500    4.13934800    2.17155600
 C                 -2.04668000    2.04497100    1.84790800
 H                  1.54955500    1.06181900    3.02136500
 C                  0.75868700    2.94070600    3.75914800
 C                 -0.55590000    0.86560500    3.46423600
 H                 -1.72097700    4.67602500    2.08189700
 H                  0.00488100    4.81628000    1.80451200
 C                 -0.52216000    3.77207800    3.63607100
 H                 -2.19819600    1.13921300    1.25281300
 H                 -2.95368400    2.65107200    1.73891100
 C                 -1.83887600    1.68115700    3.31772000
 H                  1.62692400    3.52989400    3.44860200
 H                  0.91800600    2.66585000    4.80642200
 H                 -0.64836700   -0.09796800    2.95558700
 H                 -0.37457500    0.64867500    4.52245400
 H                 -0.41901200    4.68599300    4.22741000
 C                 -1.71027600    2.95746700    4.14774700
 H                 -2.69091600    1.09109800    3.66708900
 H                 -1.56414500    2.70285400    5.20274300
 H                 -2.62746700    3.55125300    4.07286100
95
f-4-1
 Au                 0.06205600    1.50488900    0.20707300
 N                  0.10194700    3.24363000   -0.76411400
 C                  0.15735700    5.46901600   -1.33618800
 C                  1.07532100   -1.47557800   -1.76398200
 N                 -0.10429300   -1.40564300    0.40194100
 C                 -0.15780400   -2.65128400    1.24286800
 C                  1.02336900   -1.48136600   -3.15887200
 H                  1.95601400   -1.50985100   -3.70890800
 C                  0.24708500    6.31789700    1.30489300
 H                  0.28214200    6.66860400    2.32937600
 C                 -0.00036400   -0.27897300    1.06898900
 C                  0.07071000    3.33982900   -2.14072600
 C                 -1.35776200   -1.36677700   -1.71480500
 C                 -0.18434500   -1.42115900   -3.83264000
 C                  0.15370000    4.53335300   -0.27539600
 C                 -0.12678900   -1.41687700   -1.04154500
 C                  0.07923000    5.00426500   -3.91018600
 H                  0.10377500    6.03820100   -4.23607200
 C                  0.01398800    2.30682500   -3.07813000
 H                 -0.01185200    1.27117800   -2.75019500
 C                  0.10326100    4.69173100   -2.55119900
 C                  0.19856000    4.95827800    1.05306100
 H                  0.19489300    4.23312100    1.86067800
 C                 -0.33486800   -2.04642000    2.64300100
 H                  0.25207100   -2.59522700    3.38096100
 H                 -1.38696000   -2.11616500    2.93747400
 C                  0.20674800    6.83497600   -1.05935400
 H                  0.21000100    7.55891200   -1.86667100
 C                 -0.00901900    2.63932300   -4.42140200
 H                 -0.05297900    1.85032300   -5.16448200
 C                 -1.36392200   -1.36765700   -3.11030700
 H                 -2.31623300   -1.30508500   -3.62247100
 C                  0.25152000    7.25366600    0.25959200
 H                  0.29014000    8.31073700    0.49071500
 C                  1.13159600   -3.45094000    1.09853100
 H                  1.23400500   -3.84263600    0.08443900
 H                  1.09104600   -4.29987600    1.78243000
 H                  2.01546000   -2.85589800    1.33532000
 C                  0.02330400    3.97806500   -4.83964100
 H                  0.00403900    4.20771000   -5.89759700
 C                 -1.33164900   -3.53986700    0.86139200
 H                 -2.28583400   -3.03903600    1.02931700
 H                 -1.30146200   -4.43339600    1.48709500
 H                 -1.27017600   -3.85851500   -0.18228900
 C                 -2.67467000   -1.38114100   -1.02622300
 C                 -3.58699700   -2.37037800   -1.37993000
 C                 -3.04100700   -0.45278100   -0.04953800
 C                 -4.81825200   -2.46201600   -0.74315000
 H                 -3.32187000   -3.09885800   -2.13877100
 C                 -4.27374400   -0.55155700    0.57522700
 H                 -2.37336700    0.36312400    0.20167700
 C                 -5.17033800   -1.56233800    0.24679500
 H                 -6.12981100   -1.63068100    0.74236400
 C                  2.42144500   -1.58514600   -1.13917600
 C                  3.20673400   -2.68924700   -1.45431700
 C                  2.94348500   -0.61806700   -0.27939400
 C                  4.46177100   -2.85460600   -0.88185600
 H                  2.82299800   -3.44569200   -2.13102500
 C                  4.19991800   -0.78870100    0.27911400
 H                  2.37241100    0.27608800   -0.05856300
 C                  4.96726700   -1.91306000   -0.00326300
 H                  5.94553500   -2.03900700    0.44219000
 C                  5.23680900   -4.09774500   -1.22530400
 C                  4.76348500    0.23427000    1.23126400
 F                  6.44940800   -4.10663700   -0.67390900
 F                  4.59407300   -5.19613500   -0.80387900
 F                  5.38933200   -4.22635000   -2.54791800
 F                  4.81539500   -0.25263800    2.48299400
 F                  4.03602000    1.34778800    1.26812900
 F                  6.01338300    0.56992900    0.90070700
 C                 -5.73764100   -3.58724400   -1.13491800
 C                 -4.66341400    0.42349700    1.65543100
 F                 -5.22604200   -4.77329900   -0.77708500
 F                 -5.91715200   -3.62992900   -2.45946900
 F                 -6.93718800   -3.48089700   -0.56507900
 F                 -5.93098900    0.82077400    1.52262000
 F                 -3.89150700    1.50794900    1.66098800
 F                 -4.56238500   -0.14493800    2.86929600
 H                 -0.20546200   -1.40326400   -4.91423100
 C                  0.06496000   -0.56623100    2.54076200
 C                  1.51255800   -0.29444400    2.99579900
 C                 -0.88200400    0.35792400    3.31222100
 C                  1.67344000   -0.43411900    4.50459900
 H                  1.77726000    0.72564500    2.69134900
 H                  2.19629700   -0.97108300    2.47487000
 C                 -0.73617600    0.16157300    4.81479500
 H                 -0.64010900    1.39580500    3.05195100
 H                 -1.91060000    0.17642600    2.98619600
 C                  0.69327900    0.46528800    5.24676500
 H                  2.70454700   -0.19743700    4.77513500
 H                  1.50277400   -1.47474500    4.80378800
 H                 -1.44608400    0.80127600    5.34159500
 H                 -0.98654000   -0.87369500    5.07923200
 H                  0.80638300    0.34343000    6.32569500
 H                  0.91962600    1.51256600    5.01534500
93
f-5-1
 Au                 0.09804100    1.53712400    0.24000200
 N                  0.15440300    3.29348700   -0.69702300
 C                  0.22521400    5.52909000   -1.22647700
 C                  1.06285600   -1.42783600   -1.77160300
 N                 -0.11971400   -1.37500500    0.39018500
 C                 -0.20206800   -2.62954400    1.21896600
 C                  1.01749500   -1.39972800   -3.16628400
 H                  1.95176400   -1.43407700   -3.71321100
 C                  0.32500700    6.32658800    1.43011300
 H                  0.36451300    6.65725000    2.46105200
 C                  0.01318700   -0.25849200    1.07005000
 C                  0.12177800    3.41643200   -2.07164000
 C                 -1.36816000   -1.27880700   -1.72906100
 C                 -0.18619800   -1.29937800   -3.84281200
 C                  0.21636700    4.57351600   -0.18377300
 C                 -0.14082400   -1.36322600   -1.05298500
 C                  0.13999700    5.11412900   -3.80885000
 H                  0.17172600    6.15385600   -4.11507600
 C                  0.05649600    2.40194900   -3.02834000
 H                  0.02415400    1.36056800   -2.71974700
 C                  0.16363300    4.77559700   -2.45611400
 C                  0.26640400    4.97239700    1.15245700
 H                  0.25922200    4.23221800    1.94616000
 C                 -0.39178200   -2.02828200    2.61839300
 H                  0.14351600   -2.59520400    3.38239500
 H                 -1.45839500   -2.04490500    2.86874900
 C                  0.28475800    6.88915400   -0.92375100
 H                  0.29206700    7.62833000   -1.71709800
 C                  0.03396700    2.76004100   -4.36504200
 H                 -0.01643000    1.98580000   -5.12308300
 C                 -1.36796000   -1.24408500   -3.12418100
 H                 -2.31666300   -1.15343900   -3.63884400
 C                  0.33442900    7.28212000    0.40289800
 H                  0.38098100    8.33427100    0.65413200
 C                  1.07324600   -3.45295600    1.07791000
 H                  1.16584600   -3.84943000    0.06455800
 H                  1.01654300   -4.29897100    1.76411300
 H                  1.97071100   -2.87768800    1.30916300
 C                  0.07529700    4.10625700   -4.75762700
 H                  0.05634700    4.35623800   -5.81096800
 C                 -1.38375500   -3.49856300    0.81535500
 H                 -2.33463400   -2.99179300    0.98340000
 H                 -1.36688900   -4.40155700    1.42779900
 H                 -1.31695600   -3.80292200   -0.23223700
 C                 -2.68591200   -1.30498100   -1.04327500
 C                 -3.60544500   -2.27224600   -1.43810000
 C                 -3.04166900   -0.42415200   -0.01993900
 C                 -4.83185400   -2.39127900   -0.79747700
 H                 -3.34740100   -2.96614200   -2.23104500
 C                 -4.26849100   -0.55347900    0.61210800
 H                 -2.36943300    0.37665600    0.26593800
 C                 -5.17152400   -1.54323300    0.24134400
 H                 -6.12496300   -1.63657300    0.74381400
 C                  2.40181800   -1.58403400   -1.14116600
 C                  3.15457100   -2.70721900   -1.46775400
 C                  2.94794000   -0.64499700   -0.26514100
 C                  4.40009400   -2.91964600   -0.89027900
 H                  2.75172600   -3.44143600   -2.15766400
 C                  4.19636600   -0.86137700    0.29612400
 H                  2.40342200    0.26391300   -0.03716500
 C                  4.92952000   -2.00577200    0.00321800
 H                  5.90147400   -2.16727200    0.45090400
 C                  5.13773600   -4.18230200   -1.24499600
 C                  4.78874600    0.13310500    1.26094100
 F                  6.34887400   -4.23284000   -0.69276900
 F                  4.46161200   -5.26450400   -0.83420200
 F                  5.28750300   -4.30290100   -2.56860000
 F                  4.78822900   -0.35404600    2.51376700
 F                  4.11665200    1.28155500    1.28116400
 F                  6.06046100    0.40614200    0.95840600
 C                 -5.76249800   -3.48441000   -1.24932700
 C                 -4.62797700    0.35339600    1.75943900
 F                 -5.20486800   -4.69103400   -1.07973000
 F                 -6.04737300   -3.37230700   -2.55131500
 F                 -6.91411700   -3.47649000   -0.57971700
 F                 -5.92401700    0.66971700    1.75215000
 F                 -3.92810100    1.48602900    1.74667300
 F                 -4.38350500   -0.25114500    2.93624600
 H                 -0.20233700   -1.25365400   -4.92367100
 C                  0.07826700   -0.57011200    2.53525700
 C                  1.53240400   -0.38006700    2.99613900
 C                 -0.80041400    0.38159800    3.34889900
 C                  1.64027300   -0.41506000    4.49184300
 H                  1.91124900    0.57374400    2.60694600
 H                  2.16832200   -1.15842300    2.56314800
 C                 -0.79632700   -0.02636700    4.81559100
 H                 -0.40058100    1.39508400    3.23745300
 H                 -1.81761700    0.38785000    2.94913600
 C                  0.59749700   -0.28136600    5.30637200
 H                  2.63324400   -0.56475000    4.90214800
 H                 -1.26340200    0.75595400    5.41809400
 H                 -1.41446700   -0.92026100    4.96636700
 H                  0.74810700   -0.34327400    6.37881800
107
f-6-1
 Au                -0.48277500    1.02065500    0.38919200
 N                 -1.54630600    2.64393500   -0.07852500
 C                 -3.25050300    4.18701800   -0.10004800
 C                  2.03912000   -0.36605900   -2.22021600
 N                  1.00836300   -1.41006200   -0.22774000
 C                  1.67917200   -2.67333500    0.25251000
 C                  1.97105400   -0.03761900   -3.57568300
 H                  2.81994400    0.46230400   -4.02639600
 C                 -3.62082200    4.05915200    2.64814100
 H                 -3.78209200    4.02229400    3.71882400
 C                  0.48530900   -0.66763700    0.72068200
 C                 -1.76719100    3.02900300   -1.38417300
 C                 -0.23468100   -1.21301500   -2.35304700
 C                  0.83205200   -0.28698800   -4.31971800
 C                 -2.44944300    3.33921600    0.69960500
 C                  0.94539500   -1.00867100   -1.61750900
 C                 -3.19651200    4.48761300   -2.69978200
 H                 -3.99514500    5.21762700   -2.76999800
 C                 -1.11075900    2.58985000   -2.53727100
 H                 -0.29422900    1.87439700   -2.46622700
 C                 -2.81067800    3.98092300   -1.45957800
 C                 -2.63630600    3.26928200    2.08086800
 H                 -2.01847000    2.61158000    2.68511900
 C                  1.22258200   -2.70886400    1.71969500
 H                  2.04001100   -3.02329200    2.36991400
 H                  0.41915400   -3.43781400    1.82611800
 C                 -4.23520800    4.97625300    0.49327800
 H                 -4.85415500    5.62969700   -0.11141100
 C                 -1.51652700    3.10128800   -3.75887400
 H                 -1.01762300    2.77413600   -4.66459900
 C                 -0.27200700   -0.84480300   -3.69688400
 H                 -1.19567300   -0.98901700   -4.24364800
 C                 -4.41505000    4.90980100    1.86456900
 H                 -5.17589700    5.51578500    2.34009200
 C                  3.19507500   -2.59132500    0.11581300
 H                  3.49525000   -2.59899300   -0.93322000
 H                  3.62358000   -3.47573500    0.58966200
 H                  3.61184000   -1.70540100    0.59749400
 C                 -2.55149000    4.04369400   -3.84381000
 H                 -2.84459200    4.42842300   -4.81246100
 C                  1.19070900   -3.89240100   -0.50945000
 H                  0.14922100   -4.10596900   -0.27442800
 H                  1.78543200   -4.75473100   -0.20402900
 H                  1.31114000   -3.76630400   -1.58884100
 C                 -1.51742000   -1.69999800   -1.76530600
 C                 -1.80109200   -3.04779600   -1.60153600
 C                 -2.51275200   -0.76381300   -1.46979200
 C                 -3.01307700   -3.45079400   -1.05074100
 H                 -1.08656200   -3.79546000   -1.91668200
 C                 -3.73098900   -1.17911700   -0.95323100
 H                 -2.33694400    0.29080600   -1.66147200
 C                 -3.98349200   -2.52373500   -0.71294000
 H                 -4.92388400   -2.83919300   -0.28123600
 C                  3.25995200    0.06332500   -1.49129700
 C                  4.51166600   -0.31922400   -1.95786300
 C                  3.18373500    0.90123000   -0.37672100
 C                  5.66580300    0.08036600   -1.29482500
 H                  4.58910300   -0.96205600   -2.82861400
 C                  4.34124700    1.30366400    0.26733400
 H                  2.21805100    1.24698600   -0.02428000
 C                  5.59309700    0.88783000   -0.17438000
 H                  6.49093200    1.20206900    0.34205100
 C                  6.98814800   -0.40687000   -1.82222800
 C                  4.28766700    2.21220000    1.46733500
 F                  8.01831800    0.07310400   -1.12730600
 F                  7.05992600   -1.74447900   -1.77904500
 F                  7.16027400   -0.05461500   -3.10138200
 F                  4.85290900    1.62477200    2.53362400
 F                  3.04273100    2.54162000    1.80345200
 F                  4.96525800    3.34348600    1.25013600
 C                 -3.23940900   -4.92264200   -0.84685200
 C                 -4.80648100   -0.15206200   -0.70073800
 F                 -2.19177900   -5.48977900   -0.22531900
 F                 -3.38459100   -5.56804700   -2.01010400
 F                 -4.32223100   -5.17185200   -0.11076900
 F                 -5.45461500    0.14498000   -1.83402600
 F                 -4.30649600    0.98205800   -0.21982500
 F                 -5.72077400   -0.60071400    0.16726000
 H                  0.78943000   -0.01077000   -5.36491300
 C                  0.70890400   -1.30425500    2.06200500
 C                  1.76684900   -0.45552600    2.79640400
 C                 -0.59820100   -1.25858800    2.87869200
 C                  2.00954400   -0.92616100    4.22771900
 H                  1.41662700    0.58489800    2.82069800
 H                  2.70940800   -0.45901800    2.23414900
 C                 -0.35719900   -1.77351400    4.29185100
 H                 -0.81770800   -0.18240400    2.96817000
 C                  0.69584900   -0.93230600    4.99818300
 H                  2.38713800   -1.95725000    4.20165800
 H                 -1.29704600   -1.75534600    4.85098300
 H                 -0.03403700   -2.82238600    4.25543300
 H                  0.86579800   -1.29338900    6.01607400
 H                  0.33682500    0.10208400    5.08060400
 C                  3.04803800   -0.04532900    4.90531600
 H                  4.01103700   -0.09633700    4.39565800
 H                  2.72108500    0.99845300    4.89557200
 H                  3.19395900   -0.34361700    5.94530800
 C                 -1.82865200   -1.88972200    2.18007600
 H                 -1.63558900   -1.90657600    1.09635900
 C                 -3.03771600   -0.99122600    2.43129700
 H                 -3.17139600   -0.84329100    3.50814800
 H                 -2.90771400   -0.00726400    1.96909300
 H                 -3.95680200   -1.43646300    2.04440100
 C                 -2.18080800   -3.31297600    2.61358800
 H                 -2.47034300   -3.33806900    3.66683400
 H                 -3.03872000   -3.66592700    2.03534100
 H                 -1.37486000   -4.03513200    2.47329500
74
g-1-1
 Au                 1.06841900    0.06866800    1.10852700
 N                  2.84680900    0.08005800    0.19300700
 C                  5.07428700    0.13564200   -0.37340100
 C                 -1.61519300   -1.31212400   -1.07299100
 N                 -1.82881500   -0.03988300    1.06335700
 C                 -3.14755000   -0.04889500    1.80552400
 C                 -1.67566900   -1.31886800   -2.46675800
 H                 -1.63458200   -2.25955600   -2.99633400
 C                  5.91415300    0.20244200    2.27101600
 H                  6.26155300    0.22912500    3.29697900
 C                 -0.76184600    0.07850500    1.82044000
 C                  2.94701800    0.06477400   -1.18217100
 C                 -1.75538200    1.10621500   -1.11949500
 C                 -1.78931100   -0.14828800   -3.18684700
 C                  4.13397200    0.12522200    0.68423900
 C                 -1.72768900   -0.09299600   -0.37434700
 C                  4.61714300    0.08818700   -2.94887100
 H                  5.65243000    0.11214700   -3.27078700
 C                  1.91807300    0.03012900   -2.12761900
 H                  0.87990200    0.01161200   -1.80612000
 C                  4.30082000    0.09618100   -1.59071200
 C                  4.55542500    0.15826000    2.01456600
 H                  3.82728900    0.14913900    2.81892000
 C                 -2.69270800    0.50145300    3.15997200
 H                 -3.25241000    0.04630100    3.97896400
 H                 -2.86557000    1.58088900    3.18507500
 C                  6.43957000    0.17971000   -0.09158400
 H                  7.16629900    0.18820400   -0.89647100
 C                  2.25436800    0.02241200   -3.47021000
 H                  1.46682100   -0.00440800   -4.21607100
 C                 -1.80134300    1.05513000   -2.51162900
 H                 -1.85375300    1.97391100   -3.07779000
 C                  6.85398400    0.21314000    1.22894400
 H                  7.91037300    0.24792600    1.46402100
 C                 -3.71695800   -1.45867400    1.92704700
 H                 -3.94204900   -1.87732200    0.94702700
 H                 -4.65611100   -1.39123800    2.47839500
 H                 -3.05570100   -2.13480000    2.46099200
 C                  3.59462300    0.05046300   -3.88356100
 H                  3.82824300    0.04412600   -4.94079700
 C                 -4.19879400    0.81720200    1.13325000
 H                 -3.92054300    1.86763800    1.11358300
 H                 -5.12346500    0.73232500    1.70589800
 H                 -4.40722500    0.47317400    0.11798100
 C                 -1.40764500   -2.68593100   -0.45333100
 C                 -1.71701400    2.52276300   -0.55671600
 C                 -1.18183600    0.23394900    3.25568700
 C                 -0.81667800   -1.05526000    3.99939900
 H                  0.26477100   -1.20104100    3.97422500
 H                 -1.13527500   -0.97415700    5.04086100
 H                 -1.28160300   -1.93727700    3.55865000
 C                 -0.43752400    1.40647700    3.88997400
 H                 -0.80206200    1.56242900    4.90822800
 H                  0.63423000    1.20324700    3.92690400
 H                 -0.59244100    2.32396600    3.31871000
 H                 -1.84626000   -0.17185100   -4.26602400
 C                 -2.57032100   -3.67090600   -0.84151500
 C                 -0.03917500   -3.34132600   -0.84796800
 C                 -2.93590400    3.38232400   -1.06588500
 C                 -0.39312200    3.28217600   -0.91406500
 F                  0.94697800   -2.67734500   -0.28088300
 F                  0.17667000   -3.37744900   -2.15509500
 F                 -0.02910300   -4.59044500   -0.38632600
 F                 -2.28948100   -4.33288200   -1.96126800
 F                 -2.77142900   -4.54556600    0.12748400
 F                 -3.71276700   -3.01585700   -1.04916500
 F                 -2.63798700    4.02573500   -2.19257600
 F                 -4.00174900    2.62614900   -1.31570600
 F                 -3.27264800    4.27426600   -0.15014200
 F                 -0.10508200    3.25258800   -2.20665600
 F                 -0.52281400    4.55306200   -0.53837700
 F                  0.61438300    2.75327800   -0.24926900
 F                 -1.74973100    2.58138000    0.80379800
 F                 -1.35463500   -2.66218300    0.90357100
68
h-1-1
 Au                -0.60150400   -1.02500100   -0.02242300
 N                 -2.22325400    0.14473000    0.01301700
 C                 -4.40226900    0.87932700    0.05438500
 C                  2.53468600    0.35586800    1.20284200
 N                  2.23921700   -1.63937500   -0.16370000
 C                  3.35479300   -2.62770300   -0.22038700
 C                  2.70903700    1.72418100    1.31412700
 H                  2.73612300    2.16867100    2.30146400
 C                 -5.41706300   -1.64175200    0.61597200
 H                 -5.83177300   -2.61848400    0.83554300
 C                  1.02831700   -2.13275000   -0.11216900
 C                 -2.22992300    1.49947800   -0.24588400
 C                  2.60704700    0.55260100   -1.19278200
 C                  2.82420600    2.54048700    0.18444200
 C                 -3.53743700   -0.23180600    0.19276400
 C                  2.48529900   -0.22798100   -0.05670900
 C                 -3.78346800    3.35715800   -0.49362200
 H                 -4.79411500    3.75051900   -0.48864200
 C                 -1.14516600    2.34182500   -0.50520600
 H                 -0.13095900    1.94973000   -0.50404900
 C                 -3.55125100    2.00645400   -0.23600400
 C                 -4.04801500   -1.50071900    0.47509300
 H                 -3.37828700   -2.34844700    0.58065400
 C                  2.57846900   -3.92984500   -0.46388500
 H                  2.98818100   -4.75243800    0.12524500
 H                  2.65455600   -4.20469600   -1.51912500
 C                 -5.77946200    0.71465600    0.20090800
 H                 -6.44766700    1.56242400    0.09605900
 C                 -1.40155000    3.67701200   -0.76744800
 H                 -0.57546400    4.34520500   -0.98767500
 C                  2.77424500    1.92805000   -1.06660500
 H                  2.84026500    2.52316700   -1.96711000
 C                 -6.28175500   -0.54471400    0.48119400
 H                 -7.34858600   -0.68877500    0.59807200
 C                  4.11278800   -2.61434200    1.10170400
 H                  4.56751700   -1.63719000    1.27606400
 H                  4.90861500   -3.35995300    1.06941100
 H                  3.45341600   -2.84766100    1.93911500
 C                 -2.70841300    4.18767800   -0.76224300
 H                 -2.87292000    5.23736300   -0.97112600
 C                  4.29941700   -2.29079500   -1.36339800
 H                  3.75735300   -2.23049100   -2.30901000
 H                  5.05299300   -3.07559400   -1.44722500
 H                  4.81005200   -1.34221300   -1.18727100
 C                  2.99185200    4.04427800    0.36331100
 C                  1.10815000   -3.63795100   -0.11290800
 C                  0.72865200   -4.10862800    1.29544100
 H                 -0.29181500   -3.80140900    1.53217700
 H                  0.78809600   -5.19833600    1.34154600
 H                  1.39218400   -3.69320400    2.05635000
 C                  0.13357200   -4.23472500   -1.12222900
 H                  0.23353700   -5.32265400   -1.13454300
 H                 -0.89391000   -3.97975400   -0.85474700
 H                  0.32629200   -3.85671900   -2.12805500
 C                  4.35976300    4.31840600    0.99715700
 H                  4.48828900    5.39264100    1.15275100
 H                  4.45092200    3.82124200    1.96542000
 H                  5.16711100    3.96332300    0.35261500
 C                  1.89543100    4.58339500    1.28928600
 H                  1.98321300    4.18065000    2.29950300
 H                  1.97945500    5.67067300    1.35905100
 H                  0.90148000    4.33434600    0.91178200
 C                  2.90833300    4.79313300   -0.96342600
 H                  2.99888100    5.86496300   -0.77636700
 H                  3.71330300    4.50567600   -1.64381000
 H                  1.95122000    4.61634100   -1.46145600
 H                  2.40408500   -0.26464600    2.08179400
 H                  2.53573000    0.09165100   -2.17049400
68
i-1-1
 Au                 2.20805600    0.49235300    0.04756400
 N                  2.68298000   -1.44509000    0.07607800
 C                  3.92000000   -3.38291700    0.00503900
 C                 -1.39342700    1.99188500    1.06711700
 N                  0.55632800    2.91114100   -0.09660000
 C                  0.45637600    4.39528200   -0.24371400
 C                 -2.51643900    1.18057300    1.06763000
 H                 -3.09487100    1.11194500    1.97555900
 C                  6.34375700   -2.04398300    0.18885800
 H                  7.29936300   -1.53826200    0.26057000
 C                  1.76624100    2.40974700   -0.03966200
 C                  1.81252600   -2.51222300   -0.02775300
 C                 -0.93516100    1.33531700   -1.19435800
 C                 -2.87990300    0.44458000   -0.06390000
 C                  3.95880100   -1.97244200    0.09504200
 C                 -0.61271400    2.08320800   -0.07448600
 C                  1.83405700   -4.94077300   -0.18826200
 H                  2.37491800   -5.87994500   -0.22688800
 C                  0.41656500   -2.49842600   -0.08333300
 H                 -0.12825600   -1.55886600   -0.03180100
 C                  2.52358400   -3.73416100   -0.07706600
 C                  5.17804800   -1.29820500    0.18750000
 H                  5.20141100   -0.21494400    0.25998800
 C                  1.92844400    4.76034900   -0.48593500
 H                  2.20884300    5.66373500    0.05853000
 H                  2.08234700    4.95083700   -1.55122900
 C                  5.10637900   -4.11561100    0.00832900
 H                  5.08302500   -5.19767200   -0.05986600
 C                 -0.24775800   -3.70808300   -0.19499700
 H                 -1.33014000   -3.71876500   -0.23747000
 C                 -2.05241800    0.51273100   -1.18590900
 H                 -2.24013000   -0.07734700   -2.06729300
 C                  6.31374600   -3.44364300    0.10009500
 H                  7.24351600   -3.99857000    0.10420800
 C                 -0.11469200    5.02848300    1.01926700
 H                 -1.15599100    4.73860800    1.16819500
 H                 -0.08295700    6.11408700    0.91590400
 H                  0.46214300    4.74980800    1.90239500
 C                  0.45095700   -4.92314800   -0.24906200
 H                 -0.09969000   -5.85143900   -0.33575300
 C                 -0.42865000    4.72693900   -1.43594900
 H                 -0.06753100    4.22662700   -2.33671100
 H                 -0.41102300    5.80425700   -1.60758300
 H                 -1.46282500    4.42580400   -1.25692800
 C                 -4.10863100   -0.47285400    0.01566000
 C                  2.76298600    3.54137600   -0.05704100
 C                  3.31660900    3.67340600    1.36627900
 H                  3.81820300    2.75023300    1.66249600
 H                  4.03905700    4.49188400    1.39829000
 H                  2.52744400    3.87894300    2.09195900
 C                  3.90958300    3.24992200   -1.01885100
 H                  4.58970800    4.10431400   -1.05140100
 H                  4.46835300    2.37036500   -0.69196400
 H                  3.54043100    3.06097100   -2.02867000
 C                 -5.41972300    0.33410900    0.26512800
 C                 -3.90312700   -1.47600900    1.19942100
 C                 -4.31689000   -1.30933300   -1.28005500
 H                 -1.10769500    2.52358600    1.96488300
 H                 -0.29065000    1.37387300   -2.06379700
 F                 -2.64028800   -1.87301600    1.25631900
 F                 -4.66540400   -2.55490800    1.09269700
 F                 -4.20144000   -0.88943000    2.36141100
 F                 -6.39895900   -0.45964900    0.68482400
 F                 -5.26384600    1.28642500    1.17927500
 F                 -5.81579900    0.92819500   -0.85623400
 F                 -5.46716200   -1.96893900   -1.26668400
 F                 -4.32883000   -0.55065000   -2.37416400
 F                 -3.32864200   -2.19346200   -1.40408200
65
j-1-1
 Au                -0.22353800   -0.84962700   -0.03635500
 N                 -2.14127100   -0.28767100   -0.02433600
 C                 -4.43895300   -0.20501800    0.00789800
 C                  2.06430900    1.66947800    1.22221300
 N                  2.62810700   -0.34838700   -0.05582400
 C                  4.04174200   -0.83697400   -0.04282300
 C                  1.75774800    3.02693400    1.23036000
 H                  1.55348700    3.50549200    2.18301800
 C                 -4.70333500   -2.96830000   -0.00372500
 H                 -4.82675500   -4.04483700   -0.00844400
 C                  1.70254400   -1.27324600   -0.04874800
 C                 -2.53075600    1.03601500   -0.01288500
 C                  2.12772500    1.75192500   -1.21628700
 C                  1.65151900    3.76916500    0.05991400
 C                 -3.29597600   -1.04033700   -0.01242000
 C                  2.29824500    1.05580800   -0.01461800
 C                 -4.53404200    2.41080300    0.02292000
 H                 -5.61401100    2.50877400    0.03909500
 C                 -1.71991600    2.17289700   -0.02092900
 H                 -0.63872600    2.07391700   -0.04026800
 C                 -3.93956300    1.14860000    0.00795600
 C                 -3.42878300   -2.43018300   -0.01830000
 H                 -2.54725100   -3.06292000   -0.03452100
 C                  3.83607100   -2.33960000   -0.28349600
 H                  4.49976600   -2.93690300    0.34458000
 H                  4.06355800   -2.57418300   -1.32668300
 C                 -5.71420900   -0.76935900    0.02250100
 H                 -6.59431800   -0.13582800    0.03812900
 C                 -2.33037800    3.41447400   -0.00543100
 H                 -1.71551100    4.30876000   -0.01220000
 C                  1.81800000    3.10716700   -1.15061600
 H                  1.66345800    3.64879200   -2.07861700
 C                 -5.84178300   -2.14813000    0.01667900
 H                 -6.82530800   -2.60104400    0.02770200
 C                  4.68863400   -0.52770200    1.30140300
 H                  4.71393100    0.55035000    1.47487500
 H                  5.71558600   -0.89602900    1.29342300
 H                  4.15693600   -1.00515500    2.12443000
 C                 -3.72858300    3.53808800    0.01667100
 H                 -4.17811200    4.52325900    0.02809400
 C                  4.85283900   -0.18093600   -1.14928700
 H                  4.44396400   -0.41934500   -2.13064300
 H                  5.87645700   -0.55649200   -1.10464100
 H                  4.88053200    0.90419900   -1.02655100
 C                  2.04964700    0.91796200    2.52520700
 H                  2.98933400    1.03230100    3.06958900
 H                  1.25281700    1.30948600    3.15712800
 H                  1.86430900   -0.14681600    2.38348800
 C                  2.18930700    1.08808800   -2.56412400
 H                  1.39368200    1.48072100   -3.19713000
 H                  3.13852700    1.28898000   -3.06549900
 H                  2.05851700    0.00802400   -2.49817100
 C                  1.32128700    5.23330200    0.10195300
 H                  2.23099800    5.83507500    0.16276700
 H                  0.78142500    5.53925500   -0.79450800
 H                  0.70865500    5.47141300    0.97192300
 C                  2.35149200   -2.63145600   -0.00318900
 C                  2.11366800   -3.19830900    1.40047600
 H                  1.04329100   -3.28992100    1.59434600
 H                  2.57154500   -4.18718800    1.47545600
 H                  2.54574900   -2.55923700    2.17378600
 C                  1.72910700   -3.56056300   -1.03921300
 H                  2.23713600   -4.52768100   -1.02477500
 H                  0.67029000   -3.71592700   -0.82245100
 H                  1.81204700   -3.13991800   -2.04393000
71
j-2-1
 Au                -0.23784700   -0.69846200    0.02063700
 N                 -2.21508900   -0.40572300    0.01253600
 C                 -4.50222700   -0.63795500   -0.02702100
 C                  1.73949900    2.23014600    1.15947900
 N                  2.51701600    0.19309100    0.02988500
 C                  3.98526200   -0.08923400    0.01467300
 C                  1.24522000    3.52871500    1.07054900
 H                  1.02637700    4.06296000    1.98986400
 C                 -4.38585200   -3.41142500   -0.04557700
 H                 -4.36078300   -4.49472800   -0.05295400
 C                  1.73150400   -0.85222600    0.02964500
 C                 -2.78188200    0.85213500    0.01293100
 C                  1.66729600    2.08931800   -1.27537900
 C                  0.97605800    4.13517600   -0.14984100
 C                 -3.25555000   -1.30916400   -0.01129800
 C                  1.99428400    1.53828100   -0.02926200
 C                 -4.95444800    1.94025500   -0.01555100
 H                 -6.03764500    1.88976200   -0.03418900
 C                 -2.13415900    2.08915800    0.03458000
 H                 -1.04958500    2.13878500    0.05558100
 C                 -4.19286900    0.77110500   -0.01147800
 C                 -3.19694100   -2.70420100   -0.02058100
 H                 -2.23713500   -3.21051200   -0.00794900
 C                  4.00894300   -1.62047100    0.15247600
 H                  4.39937600   -1.90093100    1.13270000
 H                  4.66964400   -2.06087200   -0.59703300
 C                 -5.68817100   -1.37141300   -0.05213800
 H                 -6.64668200   -0.86415200   -0.06429000
 C                 -2.90881900    3.23556600    0.02981700
 H                 -2.42214900    4.20544700    0.04842700
 C                  1.17366300    3.38954600   -1.30652000
 H                  0.89695200    3.81474000   -2.26619100
 C                 -5.62585500   -2.75463200   -0.06143200
 H                 -6.53811100   -3.33771400   -0.08081700
 C                  4.67557700    0.60462700    1.17834500
 H                  4.54625100    1.68803700    1.12456500
 H                  5.74346800    0.38411900    1.13654800
 H                  4.28767900    0.24525600    2.13224000
 C                 -4.31081500    3.16695000    0.00477300
 H                 -4.89084600    4.08145400    0.00218100
 C                  4.59228500    0.38812300   -1.29791100
 H                  4.15160900   -0.13321200   -2.14861800
 H                  5.66421400    0.18491700   -1.28686600
 H                  4.44810200    1.46334300   -1.42544400
 C                  1.89962300    1.61093700    2.52005900
 H                  2.81501700    1.95020700    3.00982500
 H                  1.06071500    1.90382000    3.15131300
 H                  1.92024700    0.52277000    2.47614300
 C                  1.75327600    1.32156200   -2.56598500
 H                  0.90474700    1.58372800   -3.19749700
 H                  2.66377900    1.56326400   -3.11842700
 H                  1.72532400    0.24353700   -2.40778800
 C                  0.44415300    5.53760500   -0.21837300
 H                  1.25653300    6.25507500   -0.35492400
 H                 -0.24356300    5.65432900   -1.05655400
 H                 -0.08183700    5.80280800    0.69897000
 C                  2.55814500   -2.10933800   -0.02043700
 C                  2.11724400   -3.08498200    1.07793900
 C                  2.32287000   -2.72129300   -1.41723200
 H                  1.24295000   -2.80461000   -1.57510900
 H                  2.82863000   -3.91580500    1.09610900
 C                  2.01546100   -2.44938700    2.45802900
 H                  2.92805100   -1.90501700    2.72139200
 H                  1.18085100   -1.74597900    2.49699100
 H                  1.85074500   -3.20323100    3.22754200
 H                  1.14371100   -3.50004300    0.79340000
 C                  2.98379200   -4.07847800   -1.61288600
 H                  2.51200500   -4.84164000   -0.99352800
 H                  2.89816200   -4.39804800   -2.65132900
 H                  4.04661800   -4.05199000   -1.35990900
 H                  2.69361300   -2.01298900   -2.16798900
80
j-3-1
 Au                -0.26612500   -0.35991200   -0.15960800
 N                 -2.12362100   -1.08913700   -0.10762100
 C                 -3.93438500   -2.49819900    0.04011300
 C                 -0.03917300    2.84188900    1.31796600
 N                  1.66359800    1.75045800   -0.07316200
 C                  3.12645200   -1.23411300   -1.29017600
 H                  2.90439600   -0.75953200   -2.25395200
 C                  2.53328700   -3.11936100    0.24375200
 H                  1.86921100   -3.97659500    0.38652200
 C                  3.05187900    2.28868600   -0.03228000
 C                 -1.12505900    3.70555100    1.40923700
 H                 -1.57891400    3.86525800    2.38239100
 C                  3.20613300   -0.88607300    1.17768700
 H                  3.03298700   -0.17635500    1.99502600
 C                 -2.35688400   -4.78194100    0.13259000
 H                 -1.75851200   -5.68450700    0.17196600
 C                  1.54797200    0.44703100   -0.16126500
 C                 -3.27079000   -0.32477200   -0.10748700
 C                  2.23944400   -2.46462000   -1.10431700
 H                  2.45470600   -3.17233300   -1.91239400
 H                  1.18103600   -2.20211100   -1.18157100
 C                 -0.05401700    3.16289900   -1.10148700
 C                 -1.67467600    4.32644900    0.29236300
 C                  2.29944000   -2.10859700    1.36666000
 H                  2.53952900   -2.56869600    2.33124000
 H                  1.24495700   -1.82027600    1.40042700
 C                  3.98924000   -3.58034400    0.26500100
 H                  4.21647800   -4.07198100    1.21702200
 H                  4.16253500   -4.30812600   -0.53484000
 C                 -2.52257500   -2.40488000   -0.01405300
 C                  0.51783000    2.61786800    0.05169800
 C                  2.93142800   -0.17658700   -0.18033500
 C                 -5.68741200   -0.55445300   -0.00432200
 H                 -6.57756800   -1.17038900    0.06230700
 C                 -3.37891700    1.06514200   -0.17851900
 H                 -2.48542600    1.67792300   -0.24598400
 C                  4.58892500   -1.69521300   -1.26228100
 H                  4.75083400   -2.40716900   -2.07784700
 H                  5.27019400   -0.85497000   -1.42942100
 C                 -4.42160500   -1.14125200   -0.01999900
 C                 -1.72869400   -3.55275800    0.03555600
 H                 -0.64549300   -3.47160600    0.00100500
 C                  3.84012800    1.04575200   -0.43768700
 H                  4.79582800    1.00430000    0.08203600
 H                  4.05394400    1.09531500   -1.51077000
 C                 -4.54566700   -3.74780100    0.13772100
 H                 -5.62640000   -3.82815900    0.17933300
 C                 -4.64377900    1.62572400   -0.16009100
 H                 -4.74822200    2.70427800   -0.21844500
 C                 -1.13693100    4.02604100   -0.95226000
 H                 -1.59701700    4.43905900   -1.84466700
 C                 -3.75540500   -4.88431200    0.18225800
 H                 -4.21613300   -5.86129900    0.25816400
 C                  4.65575400   -1.38155700    1.22024800
 H                  5.37083000   -0.55685300    1.17177900
 H                  4.81997100   -1.88409500    2.17925500
 C                  3.38453200    2.78233200    1.37100900
 H                  2.72151000    3.60251500    1.65465800
 H                  4.41008800    3.15481300    1.38121400
 H                  3.29792300    1.98655100    2.11062900
 C                  4.89979400   -2.36812300    0.07719200
 H                  5.94617400   -2.68566600    0.08930100
 C                 -5.79397400    0.82513300   -0.07409200
 H                 -6.77075500    1.29262700   -0.06309500
 C                  3.23473600    3.43445000   -1.01571100
 H                  3.04634400    3.11114500   -2.03866700
 H                  4.26609700    3.78586800   -0.95356700
 H                  2.57389000    4.27043700   -0.77643900
 C                 -2.84990400    5.25079000    0.43029900
 H                 -2.53210400    6.23709500    0.77568200
 H                 -3.36214500    5.37986800   -0.52312000
 H                 -3.56601700    4.86317600    1.15622400
 C                  0.39165000    2.79620800   -2.49010600
 H                 -0.48393600    2.59958000   -3.10933600
 H                  0.94997700    3.60973500   -2.95835600
 H                  1.01324100    1.90121300   -2.50185600
 C                  0.42925800    2.13482600    2.56063200
 H                  1.07019400    2.77367600    3.17191700
 H                 -0.43514000    1.85920600    3.16446200
 H                  0.97672300    1.21996700    2.33317400
72
j-4-1
 Au                -0.20218000   -0.58480100   -0.07523400
 N                 -2.19882000   -0.67152300   -0.04215800
 C                 -4.39743100   -1.34233400    0.01772300
 C                  1.15371300    2.50487600    1.23070500
 N                  2.33666900    0.80476700   -0.08554200
 C                  3.83033600    0.79746800   -0.07518000
 C                  0.42560100    3.69044400    1.26492900
 H                  0.07943200    4.05737800    2.22611000
 C                 -3.74729600   -4.04064600   -0.04151300
 H                 -3.51345600   -5.09848800   -0.06448800
 C                  1.75958000   -0.36966700   -0.09911100
 C                 -2.99743800    0.45262400   -0.00117400
 C                  1.18274900    2.65453800   -1.20530300
 C                  0.08344500    4.38298800    0.10940200
 C                 -3.04515000   -1.75913200   -0.03115400
 C                  1.57122800    2.02571300   -0.01718000
 C                 -5.33818700    1.09954300    0.08391200
 H                 -6.39087500    0.84040000    0.11412100
 C                 -2.60078200    1.79154100    0.00368800
 H                 -1.54654800    2.04966900   -0.02996200
 C                 -4.36577300    0.09997700    0.03771500
 C                 -2.71806500   -3.11623900   -0.06097400
 H                 -1.67874000   -3.42659600   -0.09877100
 C                  4.12461400   -0.68841600   -0.33121600
 H                  4.93938800   -1.03772600    0.30532700
 H                  4.43887400   -0.82678500   -1.36994500
 C                 -5.41876000   -2.29189000    0.03664100
 H                 -6.45687000   -1.98020600    0.07403400
 C                 -3.58165300    2.76628000    0.05050100
 H                 -3.29145200    3.81204700    0.05419300
 C                  0.45229600    3.83555000   -1.11362500
 H                  0.12948000    4.31766400   -2.03113200
 C                 -5.09030900   -3.63675300    0.00700700
 H                 -5.87240000   -4.38556100    0.02110900
 C                  4.34351500    1.27804800    1.27634700
 H                  4.01658100    2.30210300    1.46971100
 H                  5.43446400    1.26369700    1.26698000
 H                  3.99619400    0.63670800    2.08682700
 C                 -4.94349200    2.42759000    0.09074100
 H                 -5.68873100    3.21252000    0.12647000
 C                  4.38640500    1.69350100   -1.17069100
 H                  4.07524100    1.34801000   -2.15610400
 H                  5.47647400    1.66705100   -1.12713900
 H                  4.06310400    2.72816500   -1.03496500
 C                  1.38369100    1.76172400    2.51821600
 H                  2.23128900    2.16784300    3.07424900
 H                  0.50009100    1.85468900    3.14930600
 H                  1.56074300    0.69877000    2.35401600
 C                  1.45310300    2.07374700   -2.56573700
 H                  0.57467500    2.20722500   -3.19690500
 H                  2.29010100    2.57576800   -3.05578600
 H                  1.67177600    1.00680100   -2.52185400
 C                 -0.70153500    5.66105700    0.17943000
 H                 -0.03448600    6.52322600    0.25111100
 H                 -1.31709000    5.79222200   -0.71087000
 H                 -1.35257200    5.67304900    1.05399100
 C                  2.80764400   -1.44718600   -0.08451400
 C                  2.74714100   -2.12728600    1.29664200
 C                  2.51542700   -2.49381900   -1.16373500
 C                  3.69621300   -3.31672800    1.38638400
 H                  1.71675500   -2.46658200    1.45581600
 H                  2.96511100   -1.39493500    2.08137700
 C                  3.49963400   -3.65315300   -1.08588800
 H                  1.49482700   -2.86525500   -1.01157600
 H                  2.53784600   -2.01521400   -2.14830000
 C                  3.41263800   -4.32447900    0.27929200
 H                  3.60072800   -3.78418200    2.36843700
 H                  4.73442700   -2.97500400    1.30304100
 H                  3.29469300   -4.36982800   -1.88324300
 H                  4.52092100   -3.28443500   -1.24605600
 H                  4.10610600   -5.16544500    0.34228700
 H                  2.40254700   -4.72907800    0.41233300
70
j-5-1
 Au                -0.20917100   -0.61443800   -0.06090400
 N                 -2.20664500   -0.66242500   -0.03385000
 C                 -4.41916700   -1.28687000    0.01136800
 C                  1.22208200    2.45621800    1.22699500
 N                  2.35927200    0.72500300   -0.08589600
 C                  3.85419800    0.68334700   -0.08584300
 C                  0.51737800    3.65572900    1.26022400
 H                  0.18536500    4.03441000    2.22183000
 C                 -3.82567300   -3.99830600   -0.03340900
 H                 -3.61392700   -5.06087200   -0.05058800
 C                  1.75499900   -0.43607400   -0.08383600
 C                 -2.98190400    0.47855300   -0.00304300
 C                  1.23716600    2.59300300   -1.21004700
 C                  0.18083800    4.34906100    0.10335200
 C                 -3.07580400   -1.73225900   -0.02557900
 C                  1.62109800    1.96274900   -0.02148000
 C                 -5.30934800    1.17408300    0.06113800
 H                 -6.36734400    0.93677700    0.08404900
 C                 -2.55763700    1.80896300    0.00048700
 H                 -1.49805500    2.04544700   -0.02476500
 C                 -4.35747800    0.15455400    0.02636900
 C                 -2.77699200   -3.09594200   -0.04812700
 H                 -1.74435000   -3.42846100   -0.07646700
 C                  4.10741100   -0.80969500   -0.34194600
 H                  4.92867200   -1.19377900    0.26663200
 H                  4.37690000   -0.95277000   -1.39288000
 C                 -5.46051400   -2.21451300    0.02566000
 H                 -6.49205600   -1.88087000    0.05397600
 C                 -3.51851400    2.80398000    0.03555000
 H                 -3.20672400    3.84351400    0.03787100
 C                  0.53081100    3.78876700   -1.11930800
 H                  0.21118000    4.27264800   -2.03697900
 C                 -5.16019900   -3.56602900    0.00325300
 H                 -5.95795400   -4.29818500    0.01395100
 C                  4.39203800    1.16591300    1.25533400
 H                  4.09409100    2.20109100    1.43651700
 H                  5.48198800    1.12270900    1.23595900
 H                  4.03657000    0.54804400    2.07961500
 C                 -4.88730800    2.49371200    0.06599100
 H                 -5.61636100    3.29403900    0.09280500
 C                  4.41985300    1.56052800   -1.19206900
 H                  4.09072800    1.21774600   -2.17252600
 H                  5.50934200    1.50832400   -1.15910900
 H                  4.12269200    2.60327500   -1.05840700
 C                  1.44894900    1.71580600    2.51675000
 H                  2.31193500    2.10573200    3.06054800
 H                  0.57504800    1.83318600    3.15713500
 H                  1.59999900    0.64778100    2.35799100
 C                  1.48591100    1.99959300   -2.56904300
 H                  0.60642100    2.14869900   -3.19520600
 H                  2.33040200    2.48065500   -3.06716400
 H                  1.68163900    0.92842500   -2.52050100
 C                 -0.57891300    5.64232300    0.17263000
 H                  0.10477300    6.49079400    0.25055800
 H                 -1.18695100    5.78805700   -0.72051400
 H                 -1.23426200    5.66492400    1.04379100
 C                  2.78168800   -1.53166900   -0.05070000
 C                  2.74357400   -2.16492000    1.34917000
 C                  2.46697900   -2.62423000   -1.07345900
 C                  3.54568800   -3.43186100    1.39789200
 H                  1.69897500   -2.35857200    1.62335400
 H                  3.12359400   -1.45370700    2.09068300
 C                  3.56758400   -3.67693300   -1.07918300
 H                  1.50890700   -3.07907700   -0.80109000
 H                  2.34312000   -2.18110700   -2.06613200
 C                  3.93130400   -4.09769700    0.31311500
 H                  3.81699100   -3.80366500    2.38012800
 H                  3.24585600   -4.54765100   -1.65551600
 H                  4.45954600   -3.29800600   -1.59368200
 H                  4.52880700   -4.99630500    0.42450700
84
j-6-1
 Au                 0.33831100   -0.39612800   -0.15938600
 N                  2.25175100   -0.96847000   -0.19084200
 C                  4.20382300   -2.17834300   -0.08982200
 C                 -0.36452000    3.06362300   -1.14554900
 N                 -1.80111400    1.53292700    0.12126200
 C                 -3.25059600    1.85464200    0.28520300
 C                  0.63039400    4.03651700   -1.15533500
 H                  0.96657200    4.42255600   -2.11257500
 C                  2.87931400   -4.61841900   -0.02383200
 H                  2.38093400   -5.58021700    0.00315800
 C                 -1.51629800    0.26687700   -0.04707400
 C                  3.31148500   -0.08571200   -0.18984300
 C                 -0.13557200    2.92638700    1.27891100
 C                  1.23923300    4.48518500    0.01075600
 C                  2.78951200   -2.23526200   -0.12605000
 C                 -0.77448700    2.54960600    0.09201700
 C                  5.74016700   -0.05881400   -0.11929100
 H                  6.69141200   -0.57782000   -0.07499600
 C                  3.27083500    1.30953800   -0.23554000
 H                  2.31752800    1.82826200   -0.28133300
 C                  4.54357700   -0.77642200   -0.13120300
 C                  2.12259100   -3.46185300   -0.09187100
 H                  1.03732600   -3.49555900   -0.12097600
 C                 -3.87266900    0.44785100    0.33876700
 H                 -4.77472600    0.39969400   -0.27385500
 H                 -4.16190800    0.22185300    1.36575800
 C                  4.94577300   -3.35725000   -0.02247200
 H                  6.02939800   -3.32280600    0.00512500
 C                  4.46942500    2.00058900   -0.22016600
 H                  4.45792900    3.08516000   -0.25582200
 C                  0.85484600    3.90199900    1.21140000
 H                  1.36985300    4.17929300    2.12582700
 C                  4.28133100   -4.57194500    0.01012100
 H                  4.84427300   -5.49547800    0.06256500
 C                 -3.74808000    2.68403900   -0.89070600
 H                 -3.19406600    3.62292500   -0.96168400
 H                 -4.80218600    2.92018500   -0.73735400
 H                 -3.64987600    2.14221300   -1.83156900
 C                  5.69900600    1.32529500   -0.16326700
 H                  6.62077000    1.89364100   -0.15409500
 C                 -3.47704200    2.62079300    1.57926600
 H                 -3.16455300    2.02665000    2.43920000
 H                 -4.54187100    2.83745100    1.68009800
 H                 -2.93169100    3.56750400    1.57878200
 C                 -0.89224900    2.56194700   -2.46150500
 H                 -1.71648900    3.17644300   -2.82900900
 H                 -0.09785400    2.59876300   -3.20627000
 H                 -1.23819400    1.53014900   -2.39741300
 C                 -0.40835100    2.27263800    2.60446000
 H                  0.52713800    2.16472800    3.15285200
 H                 -1.08464300    2.87181600    3.21779300
 H                 -0.84083300    1.27977300    2.48805200
 C                  2.31304500    5.53370100   -0.03121400
 H                  1.88291900    6.53435300    0.05306000
 H                  3.01720000    5.40559300    0.79125500
 H                  2.86672700    5.49012600   -0.96951500
 C                 -2.78851500   -0.53359400   -0.13745900
 C                 -2.94780300   -0.89882700   -1.62724900
 C                 -2.66656900   -1.83222000    0.67820000
 C                 -4.12935200   -1.82576600   -1.89240800
 H                 -2.02668800   -1.39757800   -1.95815800
 H                 -3.04646600    0.01508900   -2.22504200
 C                 -3.86572000   -2.74002000    0.43170600
 H                 -1.78939400   -2.33993800    0.24623400
 C                 -3.99189900   -3.08339600   -1.04518000
 H                 -5.05411400   -1.31556200   -1.59026700
 H                 -3.76075600   -3.65172300    1.02682700
 H                 -4.78405400   -2.24494000    0.77380200
 H                 -4.84451800   -3.74533000   -1.22012100
 H                 -3.09335700   -3.62413700   -1.37055600
 C                 -4.21571600   -2.15961300   -3.37395100
 H                 -5.06223700   -2.81710500   -3.58056500
 H                 -4.32623900   -1.25947900   -3.98212600
 H                 -3.30531500   -2.67265900   -3.69587200
 C                 -2.34780600   -1.60005800    2.17581300
 C                 -3.53332200   -1.75417800    3.12888000
 H                 -3.87302800   -2.79225100    3.15652500
 H                 -3.22599800   -1.48649600    4.14153400
 H                 -4.39292400   -1.13521200    2.86718300
 C                 -1.24132800   -2.55613900    2.61144600
 H                 -1.56248500   -3.59016300    2.44700700
 H                 -0.32511400   -2.39061300    2.03870900
 H                 -1.01073500   -2.44343400    3.67255600
 H                 -1.96749300   -0.57316500    2.27803700
56
k-1-1
 Au                -0.23949000   -0.81266100   -0.08092700
 N                 -2.15445900   -0.25105200   -0.06855900
 C                 -4.45166600   -0.20153500    0.02027400
 C                  2.05977900    1.61705100    1.21782700
 N                  2.63544700   -0.37343100   -0.08482600
 C                  4.03545300   -0.89475700   -0.03065500
 C                  1.73216700    2.95311900    1.33441200
 H                  1.49687100    3.38976100    2.29376800
 C                 -4.67618500   -2.96774900    0.05880900
 H                 -4.78395400   -4.04579100    0.07404400
 C                  1.67473600   -1.26933900   -0.08233000
 C                 -2.56289800    1.06678800   -0.06812800
 C                  2.26616200    1.81871800   -1.14038100
 C                  1.68725000    3.69838900    0.16870400
 C                 -3.29823100   -1.02055000   -0.01564900
 C                  2.34982900    1.01954200   -0.00581100
 C                 -4.58551300    2.41172600    0.00016600
 H                 -5.66605300    2.49306900    0.04293100
 C                 -1.77279500    2.21671700   -0.11542700
 H                 -0.69131200    2.13024700   -0.16768600
 C                 -3.97217400    1.15900500   -0.01261400
 C                 -3.41032900   -2.41181400    0.00385300
 H                 -2.52068700   -3.03294700   -0.02456300
 C                  3.78863300   -2.39170200   -0.26362900
 H                  4.42446300   -3.00218000    0.37993500
 H                  4.02443000   -2.64011100   -1.30139700
 C                 -5.71785600   -0.78319900    0.07571400
 H                 -6.60631500   -0.16199800    0.10341900
 C                 -2.40020400    3.44992100   -0.10015000
 H                 -1.80172100    4.35375500   -0.13555900
 C                  1.94401000    3.16089400   -1.08050000
 H                  1.87361900    3.75826100   -1.97756200
 C                 -5.82531600   -2.16355100    0.09468900
 H                 -6.80152800   -2.63005200    0.13736400
 C                  4.64243600   -0.58345900    1.33165600
 H                  4.69285300    0.49577000    1.49407200
 H                  5.65896700   -0.97754500    1.36784800
 H                  4.06425900   -1.02811000    2.14086400
 C                 -3.79859800    3.55128800   -0.04194700
 H                 -4.26278100    4.52946800   -0.03201700
 C                  4.87750000   -0.26471000   -1.12838100
 H                  4.44052900   -0.44499300   -2.11017600
 H                  5.87658500   -0.70237000   -1.10308000
 H                  4.97844400    0.81289500   -0.97778200
 C                  2.29161100   -2.63960500   -0.00324600
 C                  2.01400700   -3.15553000    1.41477000
 H                  0.93934600   -3.26043700    1.57317100
 H                  2.48681900   -4.13195200    1.54113400
 H                  2.40123200   -2.47726200    2.17735400
 C                  1.66415600   -3.58682700   -1.01926800
 H                  2.14249300   -4.56681100   -0.95484800
 H                  0.59725700   -3.70468100   -0.81902500
 H                  1.78097600   -3.20922200   -2.03659100
 F                  2.48549700    1.25670100   -2.32407700
 F                  1.36784400    4.98617300    0.25096600
 F                  2.08801200    0.85621700    2.30697600
56
l-1-1
 Au                -0.43711500   -0.96666600   -0.03528600
 N                 -2.30474200   -0.26405200   -0.02392400
 C                 -4.59318600   -0.04112000    0.00003100
 C                  2.06436700    1.35094000    1.18839600
 N                  2.45706600   -0.73063800   -0.06172700
 C                  3.82438300   -1.35062800   -0.05252200
 C                  1.86878900    2.72279900    1.23256900
 H                  1.72584700    3.21996300    2.18133200
 C                 -5.02720600   -2.78245400   -0.03636600
 H                 -5.21656900   -3.84920400   -0.05092900
 C                  1.43950100   -1.56018100   -0.04725300
 C                 -2.61184600    1.08075000   -0.00299800
 C                  2.11301200    1.41819600   -1.20396100
 C                  1.81979900    3.43309500    0.04399100
 C                 -3.50443000   -0.94482800   -0.02281400
 C                  2.24515500    0.68055000   -0.02463700
 C                 -4.52768400    2.57469400    0.03697800
 H                 -5.59974200    2.73767700    0.04996100
 C                 -1.73550800    2.16750800    0.00179700
 H                 -0.66250000    1.99921400   -0.01455400
 C                 -4.01110200    1.27920000    0.01343600
 C                 -3.72189400   -2.32354200   -0.04118300
 H                 -2.88134100   -3.00995500   -0.05940500
 C                  3.46159700   -2.82291600   -0.29328200
 H                  4.07508600   -3.48549800    0.31986500
 H                  3.64152300   -3.07256900   -1.34197400
 C                 -5.90084400   -0.52575400    0.00465100
 H                 -6.74027100    0.16061200    0.02210300
 C                 -2.26775200    3.44472500    0.02554200
 H                 -1.60126500    4.30056100    0.02956800
 C                  1.91712000    2.79016600   -1.17973000
 H                  1.81281300    3.33994000   -2.10418900
 C                 -6.11283000   -1.89395800   -0.01351000
 H                 -7.12240100   -2.28538500   -0.01042200
 C                  4.51244300   -1.11664000    1.28678700
 H                  4.63532100   -0.04879100    1.48149200
 H                  5.50439800   -1.56944200    1.24948500
 H                  3.95920400   -1.55939500    2.11283700
 C                 -3.65564200    3.65133200    0.04347600
 H                 -4.04442600    4.66174700    0.06180000
 C                  4.69484100   -0.77762500   -1.16028800
 H                  4.27030000   -0.97156300   -2.14312000
 H                  5.67748700   -1.24883600   -1.10715700
 H                  4.83244600    0.29975200   -1.03818800
 C                  1.96114000   -2.96935700    0.01594900
 C                  1.69181700   -3.46649200    1.44194100
 H                  0.61781600   -3.49131900    1.63441800
 H                  2.09441500   -4.47551800    1.55448000
 H                  2.15214400   -2.81889700    2.19068000
 C                  1.23988400   -3.86675300   -0.98270600
 H                  1.65638700   -4.87583800   -0.94172700
 H                  0.17490300   -3.91753900   -0.74716000
 H                  1.34623500   -3.48708300   -2.00076200
 Cl                 1.57455600    5.13012400    0.08645100
 Cl                 1.98143200    0.47468800    2.65930300
 Cl                 2.09427500    0.62263400   -2.72146100
65
m-1-1
 Au                -1.00023600   -1.08602200    0.02324300
 N                 -2.61186000    0.08695500    0.04059700
 C                 -4.74840000    0.93605700    0.01831700
 C                  2.05653500    0.59905900    1.19419800
 N                  1.85383100   -1.55536700   -0.00325600
 C                  3.04229400   -2.47370500   -0.05223100
 C                  2.24614700    1.97638800    1.16117700
 H                  2.29584600    2.52867800    2.09063900
 C                 -5.92563300   -1.57702500   -0.02577500
 H                 -6.40352200   -2.54923500   -0.04329800
 C                  0.67158400   -2.12568400   -0.01505400
 C                 -2.53441400    1.46469700    0.05507400
 C                  1.98718200    0.56815600   -1.21112500
 C                  2.33000500    2.64375000   -0.04621300
 C                 -3.95374400   -0.23451500    0.01701500
 C                  1.97870800   -0.12977700    0.00208200
 C                 -3.95914400    3.43164700    0.05265700
 H                 -4.94345900    3.88650400    0.04296500
 C                 -1.39147900    2.26558500    0.07756500
 H                 -0.40864600    1.80382100    0.08797200
 C                 -3.82318700    2.04355200    0.04247200
 C                 -4.54437300   -1.49871500   -0.00521000
 H                 -3.92749000   -2.39153600   -0.00601500
 C                  2.34407000   -3.79038700   -0.41818100
 H                  2.79500900   -4.63543900    0.10484900
 H                  2.44617600   -3.96200400   -1.49315300
 C                 -6.13903300    0.83378800   -0.00234900
 H                 -6.75503000    1.72620500   -0.00123100
 C                 -1.54689800    3.64062900    0.08696900
 H                 -0.67030600    4.27982000    0.10514800
 C                  2.17098300    1.94513500   -1.22882900
 H                  2.16448900    2.47113700   -2.17521800
 C                 -6.72189700   -0.42192500   -0.02422400
 H                 -7.80027200   -0.51776600   -0.04037300
 C                  3.74007400   -2.51902200    1.30158900
 H                  4.12478800   -1.53441700    1.57511100
 H                  4.59123000   -3.19752000    1.22927000
 H                  3.08376100   -2.87206700    2.09390400
 C                 -2.82263700    4.22422500    0.07464800
 H                 -2.91580100    5.30280800    0.08242600
 C                  4.05107400   -2.02921200   -1.10119800
 H                  3.62758600   -2.02225600   -2.10286900
 H                  4.88436500   -2.73329000   -1.09350100
 H                  4.45470400   -1.03971400   -0.87243900
 C                  1.88835900    0.03611100    2.59463100
 C                  1.75173300   -0.02320500   -2.59155300
 C                  2.58319300    4.12985100   -0.07602700
 C                  0.85312000   -3.61722900   -0.07354500
 C                  0.47628700   -4.18585000    1.29910000
 H                 -0.56225400   -3.94415400    1.53234000
 H                  0.58746200   -5.27208200    1.27969900
 H                  1.10314100   -3.78545600    2.09648000
 C                 -0.06002100   -4.21590100   -1.13932400
 H                  0.12377000   -5.28980100   -1.21918200
 H                 -1.10741600   -4.05807600   -0.87494300
 H                  0.11964600   -3.75676300   -2.11337100
 F                  2.12047400    4.72755200    1.02134100
 F                  3.89474000    4.38688000   -0.14724800
 F                  2.00886300    4.70205000   -1.13333100
 F                  3.06540600    0.00901700    3.23838700
 F                  1.08265900    0.82799200    3.30094300
 F                  2.85835700    0.10842000   -3.33929700
 F                  1.40957100   -1.31022700   -2.62412600
 F                  0.78457900    0.65565500   -3.20503100
 F                  1.37692000   -1.18975000    2.64583800
71
m-2-1
 Au                -1.00708600   -0.92245100    0.05278600
 N                 -2.63394000    0.23074700    0.05958300
 C                 -4.77938100    1.05470700   -0.00278400
 C                  2.06945600    0.84062900    1.16296600
 N                  1.85332300   -1.33451700    0.01749700
 C                  3.06241200   -2.22808600   -0.01000300
 C                  2.24145400    2.21946400    1.12084900
 H                  2.31901100    2.77277300    2.04797400
 C                 -5.92745400   -1.47228900   -0.00579000
 H                 -6.39419500   -2.45007800   -0.00726100
 C                  0.68443800   -1.93538000    0.03373300
 C                 -2.57193500    1.60924000    0.04746500
 C                  1.92091100    0.79727000   -1.23486600
 C                  2.28060600    2.88439200   -0.08887000
 C                 -3.97153600   -0.10646500    0.02956300
 C                  1.95597000    0.09773800   -0.01969100
 C                 -4.01891800    3.55930800   -0.01242700
 H                 -5.00820400    4.00229700   -0.04331300
 C                 -1.43863700    2.42405900    0.07109000
 H                 -0.45059800    1.97508100    0.11105800
 C                 -3.86703900    2.17292300    0.00782700
 C                 -4.54748300   -1.37770100    0.02793500
 H                 -3.92030000   -2.26297000    0.05310500
 C                  2.40355000   -3.59699100    0.22644000
 H                  2.57952900   -3.90978100    1.25773600
 H                  2.84119500   -4.35319800   -0.42820000
 C                 -6.16847900    0.93588200   -0.03659600
 H                 -6.79454800    1.82092500   -0.06156200
 C                 -1.60999700    3.79704200    0.04939000
 H                 -0.74107700    4.44673100    0.06850500
 C                  2.09457400    2.17654900   -1.26041600
 H                  2.05593300    2.69821700   -2.20783100
 C                 -6.73677600   -0.32666400   -0.03794300
 H                 -7.81375300   -0.43529500   -0.06388700
 C                  4.04900400   -1.86580600    1.08986300
 H                  4.41970300   -0.84391700    0.97743500
 H                  4.90615200   -2.53650400    1.01373400
 H                  3.61477500   -1.98392700    2.08035300
 C                 -2.89198900    4.36542800    0.00701400
 H                 -2.99752100    5.44278600   -0.00867400
 C                  3.77274300   -2.12139200   -1.35398200
 H                  3.13595400   -2.41799300   -2.18463700
 H                  4.64472900   -2.77655300   -1.33801300
 H                  4.12833900   -1.10313400   -1.52780000
 C                  1.98011900    0.29898700    2.57779600
 C                  1.66395600    0.20894200   -2.61208000
 C                  2.51741200    4.37272500   -0.12948700
 C                  0.89565700   -3.42462100   -0.03027300
 C                  0.00844200   -4.16493400    0.97944500
 H                 -1.02316600   -4.11441000    0.61200000
 H                  0.29960700   -5.21905600    0.95962800
 C                  0.50703300   -3.85379100   -1.46596900
 H                 -0.47363500   -3.42599000   -1.69728600
 H                  1.21353200   -3.40638300   -2.16773100
 F                  2.05044400    4.97142000    0.96580000
 F                  3.82588100    4.64387600   -0.20446100
 F                  1.93435900    4.93231600   -1.18847600
 F                  3.17855200    0.36257300    3.17820200
 F                  1.14988000    1.05574300    3.29538100
 F                  2.79470500    0.20274500   -3.33521000
 F                  1.18231000   -1.02877100   -2.61885500
 F                  0.79114200    0.97162900   -3.26897500
 F                  1.55079600   -0.95392200    2.67618800
 C                  0.47848000   -5.36300300   -1.66779900
 H                 -0.34902800   -5.82670200   -1.13155300
 H                  0.35760800   -5.59664100   -2.72545500
 H                  1.40441000   -5.83427500   -1.32806800
 C                  0.06430400   -3.63878300    2.40520900
 H                 -0.35818300   -2.63512100    2.46860300
 H                 -0.50742900   -4.28414100    3.07193600
 H                  1.08724200   -3.59746300    2.78754400
80
m-3-1
 Au                 0.55724600    0.81920500    0.10026500
 N                 -0.35145900    2.59084000    0.07579600
 C                 -0.78836100    4.84631300   -0.00210900
 C                 -1.54192300   -1.76952100   -1.25711200
 N                  0.58051500   -2.03746300   -0.01617800
 C                  1.24305400   -3.37922900   -0.03693600
 C                 -2.93174000   -1.73235400   -1.25934100
 H                 -3.45850200   -1.61834500   -2.19819500
 C                  1.90111600    5.53228800   -0.08485000
 H                  2.94506000    5.82012200   -0.12001000
 C                  1.36684800   -0.98884800    0.09132700
 C                 -1.71842600    2.76994900    0.08913400
 C                 -1.56612900   -1.88828400    1.14569600
 C                 -3.63747600   -1.80369100   -0.07271000
 C                  0.21417800    3.84783400    0.01709500
 C                 -0.84287800   -1.89986900   -0.05224400
 C                 -3.38776500    4.53257200    0.04676300
 H                 -3.65391300    5.58319900    0.01193800
 C                 -2.71503700    1.79499400    0.14037600
 H                 -2.43902300    0.74611000    0.18215600
 C                 -2.04835800    4.14306200    0.04329400
 C                  1.56655500    4.19062900   -0.02823400
 H                  2.33000900    3.41705600   -0.02288500
 C                  2.63083300   -2.97611700    0.45408000
 H                  3.39758400   -3.60189800    0.00113100
 H                  2.67749700   -3.12372300    1.53832800
 C                 -0.42806200    6.19208500   -0.05964700
 H                 -1.18943200    6.96405700   -0.07402600
 C                 -4.03777200    2.20106900    0.14098000
 H                 -4.82747800    1.45814600    0.18091200
 C                 -2.95494600   -1.85223700    1.12881400
 H                 -3.49821700   -1.83481300    2.06532700
 C                  0.91454500    6.52952400   -0.09904000
 H                  1.20960000    7.57033300   -0.14355100
 C                  1.25000800   -3.95866200   -1.44701700
 H                  0.23234200   -4.10551900   -1.81488800
 H                  1.73406900   -4.93596900   -1.41629200
 H                  1.78984400   -3.32759300   -2.14940800
 C                 -4.37587900    3.56209500    0.09428300
 H                 -5.41877800    3.85274200    0.09684700
 C                  0.55256800   -4.37119800    0.88780300
 H                  0.53557100   -4.03109400    1.92075200
 H                  1.10742200   -5.30995200    0.85368100
 H                 -0.46813000   -4.58035800    0.55857600
 C                 -0.92377300   -1.58908600   -2.63203100
 C                 -0.98317700   -1.82891100    2.54784000
 C                 -5.14480000   -1.81223600   -0.08932600
 F                 -5.62643900   -1.13489900   -1.13066100
 F                 -5.61347500   -3.06301000   -0.17650700
 F                 -5.64910700   -1.27665900    1.02223400
 F                 -1.12983300   -2.68078200   -3.38554600
 F                 -1.51587600   -0.57271600   -3.25750900
 F                 -1.36406100   -2.90883900    3.24781000
 F                  0.34473600   -1.76192400    2.62735300
 F                 -1.46937700   -0.76308700    3.18189100
 F                  0.38278500   -1.34536900   -2.63443100
 C                  2.80128300   -1.46583400    0.16725100
 C                  3.53760500   -1.14845600   -1.16722400
 C                  3.60951200   -0.79636700    1.30394100
 H                  2.96616200   -1.56268200   -2.00321500
 C                  4.94065300   -1.76290800   -1.13925400
 C                  3.69715300    0.36338400   -1.36848100
 H                  3.08307500   -0.97994600    2.24777000
 C                  4.99837000   -1.44559900    1.34379000
 C                  3.79764800    0.70642000    1.10032300
 H                  5.44148700   -1.51847700   -2.08180300
 H                  4.90627500   -2.85334900   -1.07657900
 C                  5.73800700   -1.18265800    0.02939600
 H                  2.72351200    0.85672500   -1.44355000
 H                  4.21570000    0.52973300   -2.31850200
 C                  4.51012300    0.96841400   -0.22420900
 H                  4.92522700   -2.52208900    1.52772700
 H                  5.56377200   -1.01623400    2.17673900
 H                  2.83957300    1.23227300    1.13335600
 H                  4.40123500    1.09366000    1.92826600
 H                  6.72343500   -1.65496900    0.06713200
 C                  5.89401000    0.32301800   -0.17912800
 H                  4.60680000    2.04655100   -0.38058600
 H                  6.48135000    0.75673900    0.63701500
 H                  6.43149000    0.51477100   -1.11388600
72
m-4-1
 Au                 0.70108600    1.03239300   -0.01635400
 N                 -0.54597200    2.58810300   -0.04292000
 C                 -1.49275400    4.68321300   -0.02492000
 C                 -0.83516700   -2.09256400   -1.19177400
 N                  1.30079800   -1.79553100    0.01835700
 C                  2.27010300   -2.94001700    0.07239900
 C                 -2.20246500   -2.34554000   -1.16717000
 H                 -2.74646000   -2.41851200   -2.09999700
 C                  0.96338100    5.97487100    0.03195900
 H                  1.91245400    6.49706700    0.05442400
 C                  1.81969500   -0.58939500    0.03142000
 C                 -1.91844200    2.44746200   -0.06397500
 C                 -0.82170100   -2.02574000    1.21380500
 C                 -2.87230500   -2.46242100    0.03605300
 C                 -0.28674900    3.94315400   -0.01782300
 C                 -0.11741000   -1.98355600    0.00474500
 C                 -3.94931200    3.77965300   -0.07106900
 H                 -4.44923600    4.74188900   -0.06373800
 C                 -2.66565500    1.26879400   -0.08996300
 H                 -2.15922100    0.30844000   -0.09811100
 C                 -2.55639300    3.70810600   -0.05438900
 C                  0.94886400    4.59146200    0.01077900
 H                  1.86901000    4.01599100    0.01600100
 C                  3.55562700   -2.18614600    0.43991300
 H                  4.41445300   -2.60814100   -0.08398500
 H                  3.73820000   -2.28533700    1.51431600
 C                 -1.45461800    6.07701300   -0.00354800
 H                 -2.37438600    6.65134500   -0.00898200
 C                 -4.04625300    1.36030500   -0.10571200
 H                 -4.64395900    0.45494400   -0.12659600
 C                 -2.18878400   -2.27286700    1.22300400
 H                 -2.72017000   -2.29163700    2.16620800
 C                 -0.22716000    6.71712500    0.02476200
 H                 -0.18110700    7.79877300    0.04155200
 C                  2.35433200   -3.63298300   -1.28212100
 H                  1.38855000   -4.05612900   -1.56591000
 H                  3.06620900   -4.45617400   -1.20619000
 H                  2.68817800   -2.95896500   -2.06839000
 C                 -4.68837400    2.60772600   -0.09639400
 H                 -5.77006800    2.65098100   -0.10918100
 C                  1.86839300   -3.96815900    1.11961300
 H                  1.83729400   -3.54501800    2.12098000
 H                  2.61033800   -4.76795000    1.11554300
 H                  0.89955100   -4.41713500    0.88683200
 C                 -0.27355900   -1.89417000   -2.58889800
 C                 -0.25021200   -1.76371200    2.59788600
 C                 -4.34571200   -2.78177200    0.05654200
 F                 -4.95672700   -2.34516400   -1.04427900
 F                 -4.54519700   -4.10347900    0.12547900
 F                 -4.94951600   -2.23419300    1.11056100
 F                 -0.19489900   -3.06627000   -3.23790300
 F                 -1.09634300   -1.11941700   -3.29484600
 F                 -0.33346000   -2.87589200    3.34459900
 F                  1.01852400   -1.36027000    2.63841900
 F                 -0.97839400   -0.83069700    3.20798100
 F                  0.92955500   -1.33140700   -2.63350600
 C                  3.31439400   -0.70179700    0.10362000
 C                  3.88733100   -0.26959800   -1.26084500
 C                  3.85821600    0.23844200    1.18570500
 C                  5.41153400   -0.24115100   -1.24840900
 H                  3.50278200    0.73403000   -1.47726700
 H                  3.51548300   -0.92605700   -2.05181600
 C                  5.38032300    0.21476100    1.21246300
 H                  3.50998800    1.25393500    0.96213100
 H                  3.43355500   -0.03973900    2.15471900
 C                  5.93521200    0.65802900   -0.13555000
 H                  5.77357900    0.09701300   -2.22125200
 H                  5.80373200   -1.25474500   -1.10587100
 H                  5.74706700    0.85927100    2.01323500
 H                  5.73216200   -0.80015400    1.43738400
 H                  7.02686300    0.65558900   -0.12525700
 H                  5.61739700    1.68929300   -0.32809800
70
m-5-1
 Au                -0.23801200   -1.25575300    0.01656200
 N                 -2.22126500   -1.45777300    0.03126500
 C                 -4.38047600   -2.24753400    0.01678100
 C                  0.90792600    2.03150500    1.19548200
 N                  2.20007400    0.30299100   -0.00719300
 C                  3.69821400    0.41199100   -0.05036500
 C                  0.12918400    3.18335100    1.16887600
 H                 -0.20577000    3.62059300    2.10054100
 C                 -3.58507900   -4.90625500   -0.02058600
 H                 -3.29405000   -5.94979700   -0.03509800
 C                  1.70113600   -0.91151000   -0.01520900
 C                 -3.08128400   -0.37864000    0.04489700
 C                  0.88378700    1.97979300   -1.21059900
 C                 -0.24991800    3.74528300   -0.03571000
 C                 -3.00801100   -2.59149100    0.01322800
 C                  1.34075800    1.44671600    0.00000300
 C                 -5.45398500    0.13984200    0.04779600
 H                 -6.49118200   -0.17646600    0.04187000
 C                 -2.76208700    0.98004500    0.06320300
 H                 -1.72153500    1.29032000    0.06963500
 C                 -4.42813200   -0.80516800    0.03699700
 C                 -2.60668100   -3.92798500   -0.00554000
 H                 -1.55192000   -4.18322100   -0.00774800
 C                  4.05917400   -1.03676600   -0.40657000
 H                  4.95755300   -1.37033000    0.11630400
 H                  4.24951400   -1.09921000   -1.48255200
 C                 -5.34979400   -3.24994200    0.00155800
 H                 -6.40363100   -2.99442800    0.00441700
 C                 -3.79364000    1.90233400    0.07341400
 H                 -3.56539700    2.96299500    0.08836500
 C                  0.10130300    3.12779600   -1.22202100
 H                 -0.25246100    3.52199000   -2.16637800
 C                 -4.94838900   -4.57491300   -0.01704300
 H                 -5.68896400   -5.36469200   -0.02884200
 C                  4.24312800    0.85804100    1.30085900
 H                  3.87246700    1.85182600    1.56084100
 H                  5.33012900    0.91845000    1.23220800
 H                  3.98580700    0.16787500    2.10113700
 C                 -5.13399500    1.48803700    0.06584000
 H                 -5.92185400    2.23052300    0.07421200
 C                  4.15627800    1.40786300   -1.10602200
 H                  3.84077200    1.12113100   -2.10642500
 H                  5.24664500    1.44074700   -1.09363600
 H                  3.79440400    2.41578000   -0.88790100
 C                  1.15599700    1.48953300    2.59267100
 C                  1.10811000    1.39086000   -2.59374400
 C                 -1.05329900    5.02103000   -0.05829000
 F                 -1.80039400    5.14896400    1.03764800
 F                 -0.24816000    6.08847100   -0.11877600
 F                 -1.85958800    5.07193400   -1.11785300
 F                  2.04811200    2.25151500    3.24382300
 F                  0.02565400    1.53510200    3.29658500
 F                  1.85564600    2.22667500   -3.33104300
 F                  1.70283400    0.19957600   -2.62922800
 F                 -0.06203300    1.26408300   -3.21646500
 F                  1.59476800    0.23527800    2.63718600
 C                  2.83041300   -1.89626000   -0.06168800
 C                  2.93219100   -2.57991700    1.31143900
 C                  2.56305400   -2.97774800   -1.11204100
 C                  3.85416900   -3.76263300    1.26049300
 H                  1.92828000   -2.88459000    1.63168600
 H                  3.28139900   -1.86597600    2.06295700
 C                  3.76237600   -3.90955900   -1.22225900
 H                  1.67562400   -3.53947300   -0.80279100
 H                  2.33429300   -2.51280500   -2.07496000
 C                  4.24345500   -4.34404700    0.12953700
 H                  4.21466700   -4.14204100    2.21052700
 H                  3.49674000   -4.78527800   -1.81899200
 H                  4.58048900   -3.42138300   -1.76645500
 H                  4.93246400   -5.18084400    0.17096400
84
m-6-1
 Au                 0.50584900    0.94326300   -0.20533400
 N                 -0.54887000    2.63169400   -0.30601700
 C                 -1.23096600    4.82623200   -0.25072600
 C                 -1.35697400   -2.10240300   -1.10031000
 N                  0.76399500   -1.91166800    0.16315400
 C                  1.60348300   -3.13920800    0.38319100
 C                 -2.74332200   -2.20103200   -1.12368800
 H                 -3.25093900   -2.31121500   -2.07307100
 C                  1.36533700    5.80776700   -0.31172700
 H                  2.37102500    6.21003800   -0.33682500
 C                  1.42572400   -0.78769300   -0.01674800
 C                 -1.92790300    2.65877000   -0.26245800
 C                 -1.43646500   -1.81095600    1.28228300
 C                 -3.47594000   -2.12398200    0.04502100
 C                 -0.12521500    3.94452500   -0.29753400
 C                 -0.67207300   -1.95045200    0.11615500
 C                 -3.77885100    4.22918500   -0.17705200
 H                 -4.15665400    5.24523600   -0.14920900
 C                 -2.81379300    1.57978900   -0.25260700
 H                 -2.43080700    0.56415000   -0.29187400
 C                 -2.40586700    3.98795700   -0.22707300
 C                  1.18086100    4.43635000   -0.32956800
 H                  2.02355300    3.75288500   -0.37368900
 C                  2.98003700   -2.48453800    0.59229200
 H                  3.77462100   -3.09883900    0.16621400
 H                  3.15902200   -2.39686500    1.66550300
 C                 -1.02141000    6.20469200   -0.23450000
 H                 -1.86305000    6.88751100   -0.19875800
 C                 -4.17188800    1.83977600   -0.20089900
 H                 -4.87621800    1.01432100   -0.19500400
 C                 -2.82336300   -1.90551500    1.24103400
 H                 -3.38992000   -1.78209400    2.15498100
 C                  0.27534900    6.68968600   -0.26419900
 H                  0.45397500    7.75752400   -0.25215100
 C                  1.52741000   -4.06942900   -0.82240800
 H                  0.50732400   -4.43562900   -0.95983900
 H                  2.16401400   -4.93476100   -0.63320500
 H                  1.85493100   -3.59767900   -1.74512100
 C                 -4.65562900    3.15628600   -0.16251800
 H                 -5.72332100    3.33122200   -0.12343500
 C                  1.14844600   -3.92197200    1.60686500
 H                  1.24212600   -3.34443700    2.52304300
 H                  1.78090100   -4.80626000    1.69901200
 H                  0.11681100   -4.26708300    1.50045200
 C                 -0.73881500   -2.14964600   -2.48701600
 C                 -0.91886700   -1.51334900    2.67706000
 C                 -4.97566800   -2.27150500    0.00543800
 F                 -5.48397800   -1.77308900   -1.12145500
 F                 -5.32906100   -3.56093100    0.06448700
 F                 -5.55642500   -1.65177400    1.03162400
 F                 -0.74287600   -3.40514400   -2.96097900
 F                 -1.46794500   -1.41959400   -3.33132900
 F                 -1.10321700   -2.57770500    3.47375800
 F                  0.36586900   -1.18387300    2.74919800
 F                 -1.61206700   -0.50768400    3.20872000
 F                  0.50767100   -1.69970600   -2.56206300
 C                  2.90472600   -1.08026600   -0.02990200
 C                  3.33423200   -1.06583500   -1.51576400
 C                  3.69564900    0.03228400    0.68867400
 C                  4.83715700   -1.23990800   -1.71238900
 H                  3.02911300   -0.10334300   -1.94790700
 H                  2.80659700   -1.83949400   -2.07406200
 C                  5.19715000   -0.17099500    0.52060100
 H                  3.43299900    0.94221900    0.12514500
 C                  5.59107100   -0.16364400   -0.94707800
 H                  5.13476700   -2.21553900   -1.30430600
 H                  5.72882900    0.61586900    1.06309700
 H                  5.49557300   -1.12326000    0.97837800
 H                  6.66886200   -0.30477000   -1.06525700
 H                  5.34426500    0.81232400   -1.38528100
 C                  5.17355500   -1.20895600   -3.19581100
 H                  6.24482900   -1.34111100   -3.35812300
 H                  4.64570000   -1.99185100   -3.74405900
 H                  4.88492000   -0.24567800   -3.62519900
 C                  3.27796200    0.29592100    2.15248000
 H                  2.25594700   -0.07184400    2.27571500
 C                  4.15738500   -0.36897200    3.21204000
 H                  4.28912200   -1.44241900    3.06719700
 H                  5.15215600    0.08308100    3.22727500
 H                  3.71738400   -0.21827400    4.19935000
 C                  3.25784500    1.80088400    2.40538600
 H                  4.24231700    2.23073400    2.19238000
 H                  2.52269300    2.29888300    1.76762900
 H                  3.01461100    2.02492400    3.44554700
60
n-1-1
 Au                 0.51996800   -1.14621200    0.30076600
 N                  2.25956000   -0.18214300    0.43002300
 C                  4.45113500    0.44083000    0.11699900
 C                 -1.71909800    0.78288800   -1.29097300
 N                 -2.35208100   -1.22976300   -0.08389800
 C                 -3.60620900   -1.98518100   -0.38791400
 C                 -1.62662600    2.16104700   -1.34405600
 C                  5.35746300   -2.18046900    0.01883800
 H                  5.73046100   -3.19688600   -0.02082300
 C                 -1.26484700   -1.94974500    0.08452300
 C                  2.32377800    1.19719300    0.40689500
 C                 -2.76927700    0.98274200    0.87216100
 C                 -2.09061400    2.98300400   -0.33315900
 C                  3.55046600   -0.64105800    0.25521400
 C                 -2.29664200    0.19865800   -0.16834900
 C                  3.92162400    3.00456400    0.12988000
 H                  4.93563200    3.35456300   -0.02795400
 C                  1.28048900    2.11271900    0.55728200
 H                  0.27488800    1.75832900    0.76732800
 C                  3.65060400    1.63880700    0.20737400
 C                  4.00415000   -1.95953300    0.20472800
 H                  3.30635100   -2.78344100    0.31292700
 C                 -3.16058900   -3.41595100   -0.05654400
 H                 -3.55801100   -4.12969900   -0.78007300
 H                 -3.54122300   -3.69262900    0.92988500
 C                  5.81096800    0.19541500   -0.06989200
 H                  6.50785200    1.01919200   -0.17670900
 C                  1.56839900    3.46403300    0.46776700
 H                  0.77096600    4.19108400    0.58107100
 C                 -2.66022400    2.36038100    0.75949500
 C                  6.25849700   -1.11402800   -0.11759700
 H                  7.31149300   -1.32097700   -0.26111600
 C                 -3.95568100   -1.78127100   -1.85743700
 H                 -4.16520800   -0.72921300   -2.06401900
 H                 -4.84970100   -2.35631300   -2.10164700
 H                 -3.14428200   -2.10887800   -2.50866900
 C                  2.87999600    3.91073900    0.25037600
 H                  3.07713500    4.97306400    0.18540700
 C                 -4.75693200   -1.52160300    0.49054200
 H                 -4.49267500   -1.58132700    1.54784000
 H                 -5.61539400   -2.17207000    0.31673800
 H                 -5.05931100   -0.49972200    0.25311700
 C                 -1.62112000   -3.40741200   -0.03150800
 C                 -1.00008000   -3.92250500   -1.33559100
 H                  0.08646100   -3.82735000   -1.29898300
 H                 -1.25732000   -4.97608300   -1.46381200
 H                 -1.35797300   -3.37122300   -2.20695600
 C                 -1.04813100   -4.19504200    1.14253200
 H                 -1.33788500   -5.24478200    1.05819400
 H                  0.04153400   -4.13149600    1.14511400
 H                 -1.41554600   -3.80925700    2.09519500
 H                 -1.32306000    0.17775700   -2.09610600
 H                 -1.99913400    4.05776300   -0.39214500
 H                 -3.19384000    0.54826700    1.76595300
 N                 -0.99230600    2.78134300   -2.52147700
 O                 -0.86944700    3.98675500   -2.50945800
 O                 -0.65094900    2.03827500   -3.41764800
 N                 -3.16705200    3.19463300    1.86398100
 O                 -3.02411200    4.39370800    1.76342900
 O                 -3.69743100    2.61854400    2.79239700
58
o-1-1
 Au                -0.27025800   -0.96494000   -0.18917600
 N                 -2.13327300   -0.26159100   -0.23115500
 C                 -4.40702500    0.00533100   -0.01991100
 C                  1.91399600    1.23404900    1.30325400
 N                  2.61155600   -0.67451800   -0.02563100
 C                  3.97663200   -1.26384800    0.13063000
 C                  1.66294300    2.59857700    1.43305000
 C                 -4.88222800   -2.72470800    0.13550500
 H                 -5.08767800   -3.78671000    0.19706600
 C                  1.61479600   -1.52668100   -0.11278400
 C                 -2.41873500    1.08918300   -0.25888400
 C                  2.59524900    1.57495200   -0.98453900
 C                  1.87935000    3.45892500    0.35832000
 C                 -3.33867600   -0.91920500   -0.08780400
 C                  2.38396000    0.73485600    0.09580800
 C                 -4.30135600    2.61802400   -0.12247900
 H                 -5.36507600    2.80146300   -0.01992900
 C                 -1.53166100    2.15771300   -0.40105100
 H                 -0.46989700    1.96886900   -0.53482100
 C                 -3.80730000    1.31390500   -0.12753100
 C                 -3.57582100   -2.29203200   -0.00906800
 H                 -2.75045300   -2.99463400   -0.06275400
 C                  3.68637700   -2.73724700   -0.18768000
 H                  4.24204200   -3.40102600    0.47683200
 H                  3.99808800   -2.95300100   -1.21276400
 C                 -5.71597700   -0.45252000    0.12634300
 H                 -6.54037800    0.24982800    0.17927900
 C                 -2.04171300    3.44428800   -0.39010400
 H                 -1.36919600    4.28763200   -0.50505800
 C                  2.34356600    2.94222700   -0.84745900
 C                 -5.94824500   -1.81540100    0.20312900
 H                 -6.95907500   -2.18646700    0.31622600
 C                  4.45551700   -1.03327800    1.55912600
 H                  4.55126900    0.03437100    1.76925200
 H                  5.43659400   -1.49120300    1.69105700
 H                  3.76912200   -1.47178800    2.28472100
 C                 -3.41753400    3.67758800   -0.24874700
 H                 -3.78842200    4.69460000   -0.24485100
 C                  4.95577500   -0.64277600   -0.85259700
 H                  4.58994200   -0.73024900   -1.87728200
 H                  5.90742400   -1.17184800   -0.78416500
 H                  5.14050000    0.40912400   -0.62564800
 C                  2.16386200   -2.92737100   -0.06126200
 C                  1.74790300   -3.52385100    1.28878200
 H                  0.65995200   -3.56816200    1.36203700
 H                  2.14821100   -4.53641600    1.37299700
 H                  2.11952300   -2.93474200    2.12924900
 C                  1.58220300   -3.77705500   -1.18649100
 H                  2.01284300   -4.78024100   -1.15118100
 H                  0.49878500   -3.85692600   -1.07988300
 H                  1.79789500   -3.34107300   -2.16363500
 H                  1.67881200    4.51678000    0.45839700
 H                  1.72598600    0.55721100    2.12750900
 H                  2.93210600    1.17521800   -1.93162700
 C                  1.18513900    3.12037000    2.68223400
 C                  2.56904200    3.81745600   -1.96306200
 N                  0.82606200    3.53974300    3.69278300
 N                  2.76583200    4.51506000   -2.85807100
64
p-1-1
 Au                -0.75525400    1.41857100    0.55221500
 N                 -2.27977900    0.15012200    0.87165900
 C                 -4.25670400   -0.91064800    0.34850900
 C                  1.32871800   -0.18846400   -1.46021300
 N                  1.95010900    1.87230000   -0.32775400
 C                  3.04082500    2.76295700   -0.82810700
 C                  1.32158600   -1.57273700   -1.51881600
 C                 -5.68993000    1.45858600    0.23541000
 H                 -6.26831400    2.37329600    0.18796000
 C                  0.84862900    2.46520400    0.06432000
 C                 -2.04717400   -1.20457300    0.81564100
 C                  2.70112600   -0.29563000    0.52186800
 C                  2.01038900   -2.33839700   -0.58900200
 C                 -3.62179400    0.32848400    0.59348100
 C                  2.02587700    0.44367600   -0.43506700
 C                 -3.17963300   -3.29411000    0.29152800
 H                 -4.07011900   -3.84162100    0.00484400
 C                 -0.84483000   -1.88449800    1.02873100
 H                  0.04579700   -1.32914400    1.31095300
 C                 -3.22724400   -1.91184000    0.47347800
 C                 -4.34160300    1.52318000    0.53356800
 H                 -3.84736900    2.46991100    0.72198900
 C                  2.51204000    4.13426400   -0.38334200
 H                  2.68496300    4.89084400   -1.15045900
 H                  3.03896500    4.44849600    0.52107600
 C                 -5.61891300   -0.95322300    0.04771800
 H                 -6.11186600   -1.90022600   -0.14075900
 C                 -0.82074900   -3.25959800    0.84882100
 H                  0.10653400   -3.81187900    0.97803200
 C                  2.67821900   -1.68331800    0.43209900
 C                 -6.32935300    0.23186800   -0.00559900
 H                 -7.38708300    0.21882300   -0.23533800
 C                  3.14032100    2.60838100   -2.34099500
 H                  3.41220400    1.58535000   -2.60985200
 H                  3.91459700    3.27470000   -2.72315200
 H                  2.19716100    2.85685600   -2.82959700
 C                 -1.97533000   -3.96432700    0.46875600
 H                 -1.92247900   -5.03483500    0.32116600
 C                  4.36865600    2.41174700   -0.17701100
 H                  4.29198300    2.44162500    0.91138300
 H                  5.11727400    3.14235400   -0.48675400
 H                  4.71716800    1.42366700   -0.48346900
 C                  1.01412300    3.95397200   -0.07189700
 C                  0.10695100    4.40336800   -1.22356200
 H                 -0.93613800    4.18010100   -0.99231000
 H                  0.21297500    5.48105200   -1.36436500
 H                  0.35923700    3.90600600   -2.16173300
 C                  0.58875700    4.66160200    1.21044000
 H                  0.73596000    5.73848600    1.10325500
 H                 -0.46626400    4.47107800    1.41558700
 H                  1.17208200    4.31597900    2.06581900
 H                  0.76967800    0.39610000   -2.18265700
 H                  1.99319500   -3.41928300   -0.64414800
 H                  3.20679600    0.18891000    1.34810300
 S                  0.32957100   -2.37562600   -2.73648800
 O                  0.49634200   -1.68293300   -3.96166700
 O                  0.55750600   -3.77323100   -2.61552100
 S                  3.37616100   -2.61862200    1.74464400
 O                  3.35032400   -3.99090100    1.37747800
 O                  4.54885600   -1.96582900    2.19532700
 O                  2.31118700   -2.39046000    2.88624500
 H                  1.55668100   -2.99781700    2.79365500
 O                 -1.11850000   -2.03950000   -2.25962600
 H                 -1.40603300   -2.59766500   -1.50448300
62
q-1-1
 Au                 1.49041900    1.18840800   -0.56938800
 N                  2.50231700   -0.48585000   -0.98576000
 C                  4.06462800   -2.13999700   -0.63984700
 C                 -1.03918600    0.34071200    1.35933000
 N                 -0.87667400    2.54971700    0.37897600
 C                 -1.54603100    3.74870300    0.96629900
 C                 -1.55421200   -0.95440900    1.36267900
 C                  6.16814800   -0.34161400   -0.43569400
 H                  7.00254000    0.34490900   -0.35540000
 C                  0.36914100    2.70938300   -0.00138500
 C                  1.85882500   -1.70797700   -1.00958700
 C                 -2.44976300    0.90234800   -0.51763700
 C                 -2.52691300   -1.30553000    0.44512000
 C                  3.84004900   -0.74898100   -0.76524300
 C                 -1.48263400    1.24951800    0.41879700
 C                  2.31000500   -4.07808000   -0.70574800
 H                  3.00113900   -4.89232700   -0.51800900
 C                  0.49996400   -1.96745000   -1.20604600
 H                 -0.19252900   -1.15464800   -1.41330000
 C                  2.77120900   -2.76365900   -0.78188200
 C                  4.89703400    0.15672800   -0.65969500
 H                  4.71581200    1.22198000   -0.75775800
 C                 -0.54660100    4.84918500    0.58393800
 H                 -0.42102400    5.56761100    1.39589200
 H                 -0.92275100    5.39195200   -0.28708500
 C                  5.35423000   -2.62087200   -0.41327900
 H                  5.53414800   -3.68597500   -0.31754700
 C                  0.06350300   -3.27819400   -1.12133000
 H                 -0.98959100   -3.49908100   -1.25943400
 C                 -2.98264800   -0.37483800   -0.49025500
 C                  6.40071100   -1.72003900   -0.31337700
 H                  7.40799600   -2.07750200   -0.14018300
 C                 -1.67825300    3.54300400    2.47103800
 H                 -2.30793200    2.67748100    2.68896900
 H                 -2.14221400    4.42268900    2.91916800
 H                 -0.70406400    3.38880300    2.93713500
 C                  0.95701200   -4.32922300   -0.86450900
 H                  0.58369800   -5.34365100   -0.80153200
 C                 -2.91738400    3.97377300    0.34991200
 H                 -2.85114600    4.04361800   -0.73744900
 H                 -3.32290000    4.91335200    0.72851900
 H                 -3.61259400    3.17513000    0.61563800
 C                  0.77268700    4.14240500    0.22130300
 C                  1.79099600    4.15399600    1.36720200
 H                  2.67472400    3.57561100    1.09165300
 H                  2.09274200    5.18382200    1.57040500
 H                  1.38080900    3.72659500    2.28393900
 C                  1.42228400    4.71715800   -1.03333800
 H                  1.68826700    5.76324700   -0.86529600
 H                  2.32790700    4.15963100   -1.27907900
 H                  0.74579700    4.66454500   -1.88843700
 C                 -1.00397800   -1.92088200    2.39718900
 C                 -3.99040600   -0.84235800   -1.52397000
 H                 -2.92556300   -2.31074000    0.43246700
 H                 -0.26951400    0.63160200    2.06541200
 H                 -2.75180400    1.61874700   -1.26768800
 Cl                -1.44632600   -1.31306700    4.01176300
 Cl                 0.75295600   -1.98768400    2.28456700
 Cl                -1.64332900   -3.54772900    2.22581500
 Cl                -5.30799000   -1.72821900   -0.74470000
 Cl                -4.70175500    0.48991800   -2.43377200
 Cl                -3.17114700   -1.92472200   -2.65965900
62
r-1-1
 Au                 0.86404900    1.20772100   -0.30502100
 N                  2.39917400   -0.05891700   -0.44081600
 C                  4.44527900   -1.08231000   -0.20910200
 C                 -1.70765300   -0.27011600    1.30161600
 N                 -1.94764800    1.80457700    0.06391500
 C                 -3.05018300    2.77314700    0.34524400
 C                 -1.84532100   -1.64928900    1.38999000
 C                  5.81692500    1.32512400   -0.04343200
 H                  6.36993900    2.25456700    0.02201600
 C                 -0.75030500    2.31925200   -0.10067900
 C                  2.21008400   -1.42641900   -0.46804100
 C                 -2.71999600   -0.31805300   -0.88710500
 C                 -2.42718000   -2.36737600    0.35986400
 C                  3.75417800    0.15022000   -0.28482500
 C                 -2.14819700    0.38808200    0.16369300
 C                  3.45727200   -3.50451400   -0.30882000
 H                  4.39366600   -4.03927500   -0.19450200
 C                  1.01384800   -2.12946900   -0.62306600
 H                  0.08252400   -1.59177700   -0.77723200
 C                  3.43803800   -2.10987600   -0.32236900
 C                  4.44261700    1.36122100   -0.20033300
 H                  3.90466100    2.30170300   -0.25996400
 C                 -2.35640800    4.09990200    0.00783900
 H                 -2.62825900    4.87981500    0.72123800
 H                 -2.67245500    4.43017200   -0.98499800
 C                  5.83064800   -1.09519000   -0.05027200
 H                  6.36749200   -2.03553000    0.00848900
 C                  1.05335300   -3.51268900   -0.59996700
 H                  0.13341800   -4.07490800   -0.72427800
 C                 -2.85789100   -1.69293400   -0.77607800
 C                  6.51087300    0.10810100    0.03131700
 H                  7.58667500    0.11439700    0.15373100
 C                 -3.44879200    2.65120800    1.81144100
 H                 -3.83884000    1.65364400    2.02513400
 H                 -4.23227700    3.37602000    2.03637200
 H                 -2.60089700    2.84190700    2.47074600
 C                  2.26598400   -4.20008700   -0.44034800
 H                  2.26820100   -5.28266900   -0.42895500
 C                 -4.25457500    2.50895500   -0.54404100
 H                 -3.97104100    2.51228700   -1.59809400
 H                 -4.98917900    3.29998600   -0.38572300
 H                 -4.72994000    1.55612800   -0.30328700
 C                 -0.84273700    3.81854400   -0.00003100
 C                 -0.15338700    4.22719700    1.30709400
 H                  0.89873000    3.93802700    1.28438800
 H                 -0.21871200    5.31102300    1.42480700
 H                 -0.61409800    3.75688200    2.17771600
 C                 -0.12781300    4.48152300   -1.17293300
 H                 -0.22709600    5.56688800   -1.09967300
 H                  0.93307600    4.22490300   -1.16345500
 H                 -0.54887800    4.15820700   -2.12669200
 C                 -1.33755000   -2.34417100    2.62774400
 C                 -3.46264600   -2.50126100   -1.89396300
 H                 -2.51749500   -3.44427800    0.42409100
 H                 -1.22449300    0.29106500    2.09336300
 H                 -3.02364500    0.19507500   -1.78943100
 F                 -0.13108700   -1.89854900    2.97144600
 F                 -2.15258400   -2.11304300    3.66893000
 F                 -1.26525800   -3.66287400    2.46371700
 F                 -3.71817400   -1.75589700   -2.97029900
 F                 -2.65133800   -3.49341300   -2.26634700
 F                 -4.61627600   -3.06246500   -1.51116300
73
s-1-1
 Au                 1.33815700    1.17875500   -0.56758000
 N                  2.40423500   -0.48946000   -0.91417600
 C                  3.99012400   -2.07560500   -0.38644400
 C                 -1.21340800    0.10920600    1.44804900
 N                 -1.05983500    2.34570300    0.46568300
 C                 -1.83329100    3.48258500    1.06354200
 C                 -1.77947700   -1.17614300    1.40501800
 C                  6.06215100   -0.23487400   -0.36239300
 H                  6.88591100    0.46857200   -0.34974200
 C                  0.13705700    2.63316400    0.02319000
 C                  1.78164200   -1.71354100   -0.81135100
 C                 -2.30189600    0.60525300   -0.69789200
 C                 -2.73922100   -1.53415100    0.44741500
 C                  3.74474600   -0.71040300   -0.65995500
 C                 -1.56972500    0.99949900    0.42981900
 C                  2.26225300   -4.03414000   -0.25444200
 H                  2.95966100   -4.81333700    0.03108500
 C                  0.42861000   -2.01522700   -0.99184500
 H                 -0.27057900   -1.23247800   -1.27294800
 C                  2.70815000   -2.73000400   -0.46729300
 C                  4.78699700    0.21860000   -0.64477900
 H                  4.59067000    1.26426300   -0.85489500
 C                 -0.97493500    4.67125300    0.60833200
 H                 -0.90191300    5.43029200    1.38907200
 H                 -1.43730800    5.13496400   -0.26747600
 C                  5.28501500   -2.51209600   -0.10283400
 H                  5.47979900   -3.55779100    0.10705500
 C                  0.00665600   -3.31961000   -0.78352800
 H                 -1.04441500   -3.56921500   -0.88506600
 C                 -2.88833300   -0.66795300   -0.65312000
 C                  6.31531100   -1.58961300   -0.09359200
 H                  7.32658400   -1.90983600    0.12234400
 C                 -1.88953200    3.32517900    2.57959200
 H                 -2.37268500    2.38446000    2.85330100
 H                 -2.48043200    4.14247100    2.99507100
 H                 -0.89943100    3.35452700    3.03256200
 C                  0.91178100   -4.32535300   -0.40303300
 H                  0.55005100   -5.33055400   -0.23040300
 C                 -3.25689800    3.53915800    0.52840200
 H                 -3.28592300    3.70927700   -0.54649800
 H                 -3.77456200    4.36728200    1.01443100
 H                 -3.80222700    2.62147600    0.75976100
 C                 -0.24602700    0.52020200    2.52242300
 H                 -0.73034500    0.51508900    3.49876100
 H                  0.58360700   -0.18220100    2.57224100
 H                  0.16824500    1.50402400    2.32843300
 C                 -2.37387600    1.52009700   -1.89092000
 H                 -1.83951000    1.07268100   -2.72793900
 H                 -3.39789200    1.68516800   -2.22237700
 H                 -1.91225400    2.47846600   -1.67700400
 C                 -3.61649600   -2.74999100    0.60653900
 H                 -3.86809200   -2.88319900    1.65506300
 H                 -4.53788600   -2.62823500    0.04601200
 H                 -3.12309600   -3.66259400    0.27869700
 C                  0.40219700    4.10070600    0.21672200
 C                  1.45156700    4.23881700    1.32468300
 H                  2.37510800    3.73431400    1.03427800
 H                  1.66638400    5.29656700    1.49053400
 H                  1.11175900    3.80487900    2.26708200
 C                  0.94121500    4.70981800   -1.07365100
 H                  1.09057700    5.78385100   -0.94265900
 H                  1.89550600    4.25152200   -1.33954400
 H                  0.24544800    4.55567900   -1.90170000
 S                 -1.18520000   -2.37522700    2.58471300
 O                 -1.31817300   -1.83300200    3.88922600
 O                 -1.70129000   -3.66260300    2.27667500
 S                 -3.83663400   -1.24155000   -2.04136700
 O                 -5.21002400   -1.28173900   -1.69447300
 O                 -3.40744400   -0.58358000   -3.22791700
 O                 -3.36111400   -2.74077000   -2.18020900
 H                 -2.59388900   -2.78180000   -2.77597300
 O                  0.35073500   -2.39992100    2.28067300
 H                  0.55158500   -2.95153100    1.49142900
71
t-1-1
 Au                 1.22002900    1.04765100   -0.06351600
 N                  2.58956400   -0.40064000   -0.03344000
 C                  4.55974100   -1.58386400    0.03059400
 C                 -2.06759600    0.13226700    1.22944900
 N                 -1.47874300    2.09888900   -0.09639400
 C                 -2.43516600    3.25156400   -0.11384300
 C                 -2.52947500   -1.18913000    1.26719800
 C                  6.12666200    0.70450300    0.13221000
 H                  6.75482000    1.58643400    0.17212500
 C                 -0.20549500    2.40718500   -0.09893100
 C                  2.28954700   -1.74796100   -0.06857700
 C                 -2.14041300    0.03629600   -1.22332500
 C                 -2.71581700   -1.94111900    0.10088900
 C                  3.96475800   -0.30071200    0.02550300
 C                 -1.92628000    0.73151500   -0.02743500
 C                  3.38565800   -3.91803100   -0.06148200
 H                  4.28563800   -4.52229300   -0.03334100
 C                  1.03385000   -2.35571800   -0.13755600
 H                  0.13308500   -1.74809600   -0.16985300
 C                  3.46891200   -2.52627700   -0.03134000
 C                  4.75181700    0.85092800    0.07654400
 H                  4.28758800    1.83206300    0.07220800
 C                 -1.47541000    4.41881300   -0.38828900
 H                 -1.73187800    5.29228300    0.21388500
 H                 -1.54661200    4.70615200   -1.44055000
 C                  5.94747200   -1.70861300    0.08738200
 H                  6.41063100   -2.68912300    0.09183600
 C                  0.97453900   -3.73829900   -0.16877600
 H                  0.01053800   -4.23050400   -0.22937800
 C                 -2.59311300   -1.28550600   -1.13132400
 C                  6.72537700   -0.56424600    0.13800300
 H                  7.80424200   -0.64455700    0.18246000
 C                 -3.14735400    3.36533400    1.22812000
 H                 -3.72988400    2.46466000    1.43467800
 H                 -3.83492000    4.21141800    1.19101800
 H                 -2.44566900    3.52812600    2.04583600
 C                  2.13960300   -4.51874600   -0.13007300
 H                  2.05978500   -5.59817500   -0.15649100
 C                 -3.47000100    3.08555800   -1.21587100
 H                 -2.99938900    3.05274800   -2.19764700
 H                 -4.14675700    3.94102700   -1.19146800
 H                 -4.06355500    2.17997500   -1.07092700
 C                 -1.58199600    0.83715200    2.47050100
 H                 -2.39534500    1.26316700    3.05567300
 H                 -1.04857300    0.13550400    3.10977000
 H                 -0.88582200    1.63072400    2.20923200
 C                 -1.73711000    0.65249600   -2.53840800
 H                 -1.19736600   -0.07798500   -3.13965500
 H                 -2.59452100    0.98664900   -3.12031300
 H                 -1.07259600    1.49820700   -2.37694000
 C                 -2.88288100   -3.44168900    0.16847700
 H                 -3.92768500   -3.74195600    0.22796500
 H                 -2.44489000   -3.90997900   -0.70889800
 H                 -2.36346300   -3.83572900    1.03887000
 C                 -0.05542800    3.90493500   -0.09185100
 C                  0.44152500    4.30318800    1.30236900
 H                  1.40161900    3.82777100    1.51194600
 H                  0.56890500    5.38704700    1.34523500
 H                 -0.26216100    4.00902000    2.08417500
 C                  0.96006800    4.34744800   -1.13965600
 H                  1.02474100    5.43777600   -1.15666300
 H                  1.94664200    3.94032800   -0.90919000
 H                  0.67362300    4.00149800   -2.13545600
 C                 -2.90664400   -2.06345400   -2.39624000
 C                 -2.78889600   -1.84650700    2.61078200
 F                 -3.78687300   -2.73496000    2.55289800
 F                 -3.16202400   -0.96461200    3.54603500
 F                 -3.92119600   -2.91783000   -2.21880800
 F                 -3.28698900   -1.27649300   -3.40839400
 F                 -1.85421700   -2.77261100   -2.82363100
 F                 -1.70998000   -2.48485400    3.07925400
62
u-1-1
 Au                -0.18147800   -0.57498200    0.10857500
 N                 -2.11708200   -0.06865600    0.11049500
 C                 -4.40528900   -0.15213900   -0.10708600
 N                  2.74794400   -0.23023500    0.02439600
 C                  4.09867700   -0.87424300   -0.00506300
 C                 -4.43348100   -2.89511300   -0.52646700
 H                 -4.46422500   -3.96555700   -0.69176000
 C                  1.73969600   -1.06266500    0.08593400
 C                 -2.61467700    1.20855500    0.26146800
 C                 -3.20034500   -0.89324000   -0.11128600
 C                 -4.72872700    2.41490800    0.25186100
 H                 -5.80878000    2.42695000    0.15455300
 C                 -1.91820800    2.39320400    0.51439800
 H                 -0.83789900    2.38035400    0.63231900
 C                 -4.02415400    1.21738900    0.13427700
 C                 -3.21429500   -2.27353000   -0.32311100
 H                 -2.28607800   -2.83665600   -0.32517200
 C                  3.72192300   -2.34522600   -0.24231500
 H                  4.36354100   -3.01766600    0.33000400
 H                  3.85080600   -2.58199800   -1.30212300
 C                 -5.62344400   -0.79870300   -0.31479300
 H                 -6.55059900   -0.23611300   -0.31235300
 C                 -2.63677300    3.57077900    0.62673200
 H                 -2.11219300    4.49821200    0.82481000
 C                 -5.63324700   -2.16740600   -0.52325000
 H                 -6.57094200   -2.68394100   -0.68569500
 C                  4.83189500   -0.69262100    1.32396600
 H                  5.18581300    0.32730300    1.46186700
 H                  5.70276300   -1.35031000    1.33128500
 H                  4.19473500   -0.95839200    2.16793500
 C                 -4.03324400    3.58761000    0.49502300
 H                 -4.56716100    4.52490400    0.58899800
 C                  4.95874400   -0.35508700   -1.14902700
 H                  4.43682900   -0.45063000   -2.10224400
 H                  5.86664900   -0.95994800   -1.19427000
 H                  5.25644100    0.68420600   -1.00802700
 C                  2.24158000   -2.48228000    0.13166100
 C                  2.02509300   -3.01196800    1.55292000
 H                  0.96213500   -2.99638200    1.80094100
 H                  2.38436100   -4.04173800    1.61407800
 H                  2.55560900   -2.41590500    2.29704200
 C                  1.47428800   -3.36163200   -0.85095200
 H                  1.90039300   -4.36784800   -0.85484200
 H                  0.42255000   -3.42931600   -0.56404000
 H                  1.52482600   -2.95862300   -1.86440300
 C                  2.48938500    1.22347000   -0.06532700
 C                  3.40517900    2.12155100    0.75266600
 C                  2.39134700    1.68908900   -1.51520200
 H                  1.48713900    1.33269000    0.36439700
 C                  2.84879900    3.54405700    0.70538400
 H                  4.42146100    2.12318900    0.34416500
 H                  3.45806400    1.76938800    1.78506600
 C                  1.84661100    3.11225600   -1.55218600
 H                  3.37748200    1.66474000   -1.98938200
 H                  1.73461300    1.00406200   -2.05917200
 C                  2.73036000    4.04249300   -0.72995400
 H                  3.48246600    4.20854300    1.29551500
 H                  1.85623500    3.55141300    1.17172200
 H                  1.77343400    3.45834500   -2.58447400
 H                  0.82883900    3.11489900   -1.14370800
 H                  2.33519100    5.05986100   -0.74614200
 H                  3.73011900    4.08072600   -1.18019200
74
v-1-1
 Au                 0.56228300   -0.73527200   -0.20301200
 N                  2.40862500    0.03488600   -0.18986000
 C                  4.68877000    0.27635500   -0.01470900
 N                 -2.39564000   -0.77213300   -0.24258300
 C                 -3.63170400   -1.61567300   -0.34477200
 C                  5.14172600   -2.46131300    0.03780300
 H                  5.33835500   -3.52666000    0.05951100
 C                 -1.28134500   -1.45983900   -0.18904800
 C                  2.70221800    1.38209400   -0.17388700
 C                  3.60983200   -0.63521100   -0.09271300
 C                  4.60924900    2.88751900   -0.02846200
 H                  5.67779500    3.05300400    0.05482700
 C                  1.82628500    2.46866200   -0.25026400
 H                  0.75552400    2.30757300   -0.35080300
 C                  4.09798600    1.59096300   -0.06544500
 C                  3.83703800   -2.01277300   -0.06584900
 H                  3.00380700   -2.70623700   -0.12753200
 C                 -3.09683300   -2.96586400    0.14453600
 H                 -3.58929600   -3.79849800   -0.36093400
 H                 -3.29556000   -3.05658500    1.21716800
 C                  5.99635600   -0.19762800    0.08912800
 H                  6.82825300    0.49555200    0.14891800
 C                  2.35512800    3.74731800   -0.21078900
 H                  1.68987800    4.60083500   -0.27046700
 C                  6.21792100   -1.56408900    0.11483000
 H                  7.22735600   -1.94762000    0.19490700
 C                 -4.10646800   -1.70019200   -1.79695400
 H                 -4.56500300   -0.77185200   -2.13229000
 H                 -4.85667200   -2.48950500   -1.87167300
 H                 -3.28393100   -1.94095800   -2.47016300
 C                  3.73678900    3.96106200   -0.09918200
 H                  4.11984200    4.97342600   -0.07148400
 C                 -4.77326500   -1.13664700    0.53812500
 H                 -4.44722600   -1.00083200    1.57094800
 H                 -5.55038100   -1.90368200    0.52507100
 H                 -5.21644100   -0.20905600    0.17436700
 C                 -1.58136800   -2.93390000   -0.08571700
 C                 -1.12592800   -3.64617600   -1.36118800
 H                 -0.05449700   -3.49470700   -1.50816700
 H                 -1.31646000   -4.71747400   -1.26529900
 H                 -1.64348700   -3.28344900   -2.24951400
 C                 -0.81851100   -3.51679700    1.10380700
 H                 -1.11715200   -4.55705000    1.25584100
 H                  0.25843000   -3.48181700    0.92608200
 H                 -1.03068400   -2.95606800    2.01774700
 C                 -2.37568600    0.70423000   -0.22659900
 C                 -3.11463700    1.33164200   -1.40123300
 C                 -2.83012200    1.33062700    1.10342000
 H                 -1.31277100    0.94714900   -0.34370800
 C                 -2.83127900    2.82917600   -1.47369300
 H                 -4.19850900    1.19753800   -1.28640900
 H                 -2.81470000    0.84495600   -2.33406700
 C                 -2.52061300    2.82740600    1.01675400
 H                 -3.92157400    1.23871400    1.16894400
 C                 -3.23437200    3.48123700   -0.15708200
 H                 -1.74754900    2.96047600   -1.60096800
 H                 -2.79493200    3.31362600    1.95659500
 H                 -1.43904500    2.96320200    0.89525800
 H                 -3.01860100    4.55233500   -0.19014400
 H                 -4.32144600    3.37780100   -0.03599900
 C                 -3.55392000    3.45834400   -2.65381100
 H                 -4.63527400    3.33426800   -2.54184300
 H                 -3.34547800    4.52751800   -2.71828400
 H                 -3.25719600    2.99642100   -3.59726100
 C                 -2.22547100    0.67371000    2.35723300
 H                 -2.20815200   -0.41224600    2.19343800
 C                 -3.11034200    0.94084000    3.57068000
 H                 -2.69227600    0.47701700    4.46579300
 H                 -3.18761500    2.01422400    3.76362900
 H                 -4.12222800    0.55282600    3.42524100
 C                 -0.79730100    1.12777700    2.64601900
 H                 -0.34685300    0.49804400    3.41475800
 H                 -0.15214400    1.08052600    1.76442000
 H                 -0.78812500    2.15733500    3.01294200
60
w-1-1
 Au                -0.10897100   -0.57446600    0.15996600
 N                 -2.06144500   -0.14015700    0.16386400
 C                 -4.33767000   -0.27554800   -0.13560900
 N                  2.78653500   -0.07219200    0.00965600
 C                  4.17207600   -0.62791000   -0.06211400
 C                 -4.28114600   -3.00841300   -0.61419300
 H                 -4.27881000   -4.07539600   -0.80300600
 C                  1.83452700   -0.96387000    0.11874400
 C                 -2.59655400    1.12118100    0.32503400
 C                 -3.11483800   -0.98634100   -0.11354200
 C                 -4.73922000    2.27435300    0.26385900
 H                 -5.81505000    2.26152800    0.12761800
 C                 -1.94021100    2.31618800    0.63266900
 H                 -0.86686000    2.33010800    0.80143900
 C                 -4.00034800    1.09760300    0.14723300
 C                 -3.08589400   -2.36134500   -0.35566000
 H                 -2.14386900   -2.90069100   -0.33779100
 C                  3.88484600   -2.12768800   -0.24063900
 H                  4.58427000   -2.73693000    0.33483400
 H                  4.00025400   -2.39303200   -1.29513200
 C                 -5.53105900   -0.94750300   -0.39898500
 H                 -6.47190700   -0.40841200   -0.41656100
 C                 -2.69283500    3.47284600    0.74216900
 H                 -2.19932900    4.40701000    0.98383700
 C                 -5.49862700   -2.31107700   -0.63666300
 H                 -6.41674600   -2.84716400   -0.84191800
 C                  4.94393800   -0.36154600    1.22908100
 H                  5.18949100    0.69090700    1.35620100
 H                  5.88072300   -0.92044800    1.19514600
 H                  4.37854500   -0.69497800    2.09975100
 C                 -4.08313400    3.45845900    0.55653900
 H                 -4.64410300    4.37980800    0.65077400
 C                  4.93443600   -0.08514800   -1.26364600
 H                  4.36195700   -0.23149300   -2.18108400
 H                  5.87200800   -0.63714900   -1.35374000
 H                  5.17797500    0.97269700   -1.16410400
 C                  2.42654100   -2.34705400    0.18208700
 C                  2.28441400   -2.85334200    1.62116300
 H                  1.23001900   -2.89817300    1.90007700
 H                  2.70988000   -3.85661800    1.69591200
 H                  2.79648500   -2.20627700    2.33505700
 C                  1.68710400   -3.29574500   -0.75641800
 H                  2.17230900   -4.27475900   -0.74822400
 H                  0.64953900   -3.41769000   -0.43765500
 H                  1.68579200   -2.91692600   -1.78046300
 C                  2.42697200    1.35406400   -0.12478700
 C                  3.32480900    2.35927700    0.57569500
 C                  2.21495600    1.75966900   -1.58043000
 H                  1.44949100    1.42452100    0.36366200
 C                  2.76040500    3.73699600    0.34857900
 H                  4.35336900    2.31851700    0.20370100
 H                  3.36680100    2.14989800    1.64803500
 C                  1.36395400    3.02303700   -1.59572700
 H                  3.17933000    1.95157800   -2.06083500
 H                  1.71498600    0.94942400   -2.11678400
 C                  1.86922600    4.02249400   -0.59762700
 H                  3.09895200    4.51847700    1.01965700
 H                  1.35623900    3.46758800   -2.59348600
 H                  0.32042600    2.76856900   -1.37041600
 H                  1.48088300    5.03297600   -0.66733000
68
e-1-0
 Au                -0.24879400   -0.89696700   -0.11303200
 N                 -2.10862000   -0.16966700   -0.15113700
 C                 -4.38442700    0.14911000   -0.09375200
 C                  2.09631000    1.46247200    1.36839400
 N                  2.60395400   -0.54410200    0.06212800
 C                  3.95762800   -1.10502500    0.16950800
 C                  1.94754600    2.84734700    1.40355600
 H                  1.70674700    3.32797600    2.34457900
 C                 -4.93399500   -2.57117600   -0.14836300
 H                 -5.16838300   -3.62886200   -0.16982400
 C                  1.64480400   -1.42782500   -0.04025900
 C                 -2.35819600    1.18803400   -0.11376500
 C                  0.49247200    0.90063500    3.20146000
 H                 -0.27939900    0.70701600    2.45273700
 H                  0.38487700    1.93538600    3.53491200
 H                  0.31487900    0.25235100    4.06139000
 C                  2.51999100    1.61921500   -1.04365800
 C                  2.07751500    3.61084200    0.25416100
 H                  1.94754600    4.68471400    0.30116800
 C                 -3.33505500   -0.79957800   -0.13985100
 C                  2.40042000    0.87825600    0.13567900
 C                  1.45142400    1.06387200   -3.21380200
 H                  0.60738700    0.61806200   -2.68157200
 H                  1.56725900    0.55903800   -4.17476900
 H                  1.20815500    2.11194900   -3.40610200
 C                 -4.21019200    2.75916200   -0.02849400
 H                 -5.27430000    2.96618900    0.00202100
 C                 -1.43474600    2.23683100   -0.11496700
 H                 -0.36782600    2.03373100   -0.15792200
 C                  1.89087700    0.65761600    2.63296700
 H                  1.96498900   -0.40463800    2.38394600
 C                  2.73726400    0.96523500   -2.39110300
 H                  2.95368500   -0.09600100   -2.23396200
 C                 -3.74783000    1.44396000   -0.07451100
 C                 -3.61059800   -2.16777100   -0.16677500
 H                 -2.79977700   -2.88790900   -0.20256600
 C                  3.74182300   -2.53020300   -0.31941100
 H                  4.41556700   -3.24951700    0.14612000
 H                  3.88782900   -2.57147400   -1.40215800
 C                 -5.71116900   -0.28016400   -0.07552600
 H                 -6.52064300    0.44069100   -0.04045600
 C                  2.96428800    0.98510300    3.67006100
 H                  3.96850000    0.79603500    3.28347900
 H                  2.82069100    0.38624400    4.57132100
 H                  2.90962700    2.03839400    3.95578900
 C                 -1.91618100    3.53354000   -0.06581300
 H                 -1.21302500    4.35946900   -0.06531800
 C                  2.34893300    2.99841200   -0.96032700
 H                  2.41423200    3.59595000   -1.86212500
 C                 -5.98089900   -1.63802700   -0.10307000
 H                 -7.00596100   -1.98672300   -0.08993400
 C                  3.91571500    1.57844500   -3.14367000
 H                  4.83506000    1.53238000   -2.55605900
 H                  3.72320500    2.62604200   -3.38439200
 H                  4.07928000    1.05014300   -4.08452100
 C                 -3.29354800    3.79820400   -0.02185600
 H                 -3.63958700    4.82368600    0.01437600
 C                  2.26367100   -2.80527700    0.00788600
 C                  2.09871100   -3.30111200    1.44921400
 C                  1.59510100   -3.76540600   -0.96237700
 H                  1.04448400   -3.30806500    1.73236700
 H                  2.63887500   -2.66468200    2.15581000
 H                  0.54547800   -3.90365300   -0.69563900
 H                  1.63688800   -3.38298300   -1.98421300
 H                  2.49155300   -4.31673300    1.53197600
 H                  2.09407600   -4.73677200   -0.93296400
 H                  4.64716400   -0.51655200   -0.43819300
 H                  4.28231400   -1.04242300    1.21410300
80
e-1-2
 Au                -0.64709800   -0.88168500   -0.06108500
 N                 -2.54884900   -0.26337800    0.00846100
 C                 -4.83970100   -0.08047900    0.07391100
 C                  1.71278700    1.63032800    1.24559200
 N                  2.20028200   -0.38870000   -0.08019700
 C                  3.62089500   -0.88842900   -0.10837700
 C                  1.52499700    3.01177000    1.27044300
 H                  1.41162400    3.50845700    2.22683900
 C                 -5.22661300   -2.82743100   -0.03023600
 H                 -5.39782100   -3.89663100   -0.07051700
 C                  1.27478800   -1.31248800   -0.12937400
 C                 -2.87798200    1.07578100    0.07081900
 C                  0.15208400    0.98323100    3.06478500
 H                 -0.57213500    0.62944600    2.32825800
 H                 -0.08636100    2.02523500    3.29237700
 H                  0.03061900    0.39961700    3.97947900
 C                  1.66548800    1.71975500   -1.20342400
 C                  1.43777900    3.74782100    0.10064500
 H                  1.29462700    4.82017100    0.14204900
 C                 -3.73584400   -0.96425900    0.00927600
 C                  1.86209700    1.01507000   -0.00595500
 C                  0.12884900    1.18391300   -3.08428300
 H                 -0.58889500    0.74202400   -2.38982200
 H                  0.03135500    0.68569000   -4.05091200
 H                 -0.13886400    2.23531200   -3.21560000
 C                 -4.81905700    2.53416000    0.17966800
 H                 -5.89346500    2.67795200    0.21333100
 C                 -2.01803100    2.17733400    0.09084900
 H                 -0.94097800    2.03765200    0.05547000
 C                  1.59078000    0.86636000    2.54989800
 H                  1.78587800   -0.19076100    2.35505000
 C                  1.56489400    1.06330500   -2.56627100
 H                  1.79306300   -0.00187300   -2.46398000
 C                 -4.28055200    1.24912100    0.11406500
 C                 -3.92963700   -2.34569000   -0.04304700
 H                 -3.07723300   -3.01527000   -0.09253500
 C                  3.38497900   -2.34441400   -0.53383700
 H                  4.07169700   -3.02979200   -0.03520200
 H                  3.55873000   -2.42870500   -1.61132800
 C                 -6.13858900   -0.58839600    0.08599500
 H                 -6.98950300    0.08215600    0.13547300
 C                  2.55266000    1.36349800    3.62800000
 H                  3.59288000    1.35994500    3.30021700
 H                  2.47017100    0.73890000    4.51935300
 H                  2.30060000    2.38454800    3.92307400
 C                 -2.57459700    3.44291900    0.15630200
 H                 -1.92064100    4.30826700    0.17272700
 C                  1.46915800    3.09621800   -1.12202400
 H                  1.31854900    3.66074300   -2.03459000
 C                 -6.32708800   -1.95916500    0.03393200
 H                 -7.32957400   -2.36842900    0.04245700
 C                  2.53007300    1.68219700   -3.57819500
 H                  3.55570200    1.71716100   -3.20600400
 H                  2.22973000    2.70507400   -3.81554100
 H                  2.51606000    1.11421900   -4.51016900
 C                  4.23321300   -0.75591800    1.28795000
 H                  4.20147900    0.30049500    1.56829000
 H                  3.60385900   -1.28788500    2.00485200
 C                 -3.96522200    3.62537400    0.20095200
 H                 -4.37118500    4.62801800    0.25178200
 C                  4.48275800   -0.16435200   -1.15067800
 H                  3.92231300   -0.14118400   -2.08820300
 H                  5.33394000   -0.82758600   -1.33858300
 C                  1.91432700   -2.66901300   -0.23341200
 C                  1.70393000   -3.39498800    1.09864500
 C                  1.26084900   -3.47194400   -1.35425100
 H                  0.63651700   -3.51670300    1.29245100
 H                  2.13828500   -2.84799300    1.93751000
 H                  0.20952400   -3.65863500   -1.12696800
 H                  1.31309000   -2.93261200   -2.30317700
 H                  2.16743100   -4.38302900    1.05259700
 H                  1.77254600   -4.43036900   -1.47064800
 C                  5.66117300   -1.27640100    1.39272600
 H                  6.34760700   -0.73336700    0.74267100
 H                  6.02361000   -1.17095800    2.41525800
 H                  5.72517300   -2.33399600    1.13158300
 C                  5.01013700    1.22464700   -0.80403900
 H                  4.21528800    1.93397400   -0.57192200
 H                  5.68967400    1.19793100    0.04882600
 H                  5.57104300    1.62384600   -1.65068100
89
e-1-3
 Au                 1.17895200   -0.82071300   -0.08414700
 N                  3.10714000   -0.28923500   -0.05218100
 C                  5.40338600   -0.20855300    0.01876100
 C                 -1.15801300    1.79447500   -1.14900500
 N                 -1.70457200   -0.32706500    0.00878000
 C                 -0.85299400    3.15092500   -1.05715900
 H                 -0.72966000    3.72308600   -1.96868700
 C                  5.66467000   -2.97266500    0.00572200
 H                  5.78712400   -4.04929900    0.00140000
 C                 -0.75007100   -1.22719200   -0.05926100
 C                  3.49657100    1.03381600   -0.02830700
 C                  0.24791500    1.00249900   -3.04240700
 H                  0.85731900    0.37925900   -2.38632200
 H                  0.72570500    1.98409400   -3.10467000
 H                  0.24508500    0.56002500   -4.04082900
 C                 -1.02867800    1.65244300    1.29283100
 C                 -0.67414600    3.76917800    0.16982500
 H                 -0.44343600    4.82585500    0.21886200
 C                  4.26034000   -1.04320700   -0.02219900
 C                 -1.31990700    1.07523800    0.04736400
 C                  0.50513800    0.90550400    3.10763700
 H                  1.21074400    0.53428000    2.36148400
 H                  0.59677300    0.29529100    4.00837500
 H                  0.79617100    1.92756500    3.36171000
 C                  5.49812400    2.40801700    0.04638500
 H                  6.57759000    2.50699600    0.07993100
 C                  2.68396500    2.16994100   -0.04118600
 H                  1.60237000    2.07148700   -0.07548700
 C                 -1.18716200    1.15965500   -2.52798500
 H                 -1.63801900    0.16645000   -2.44455200
 C                 -0.93690100    0.87435400    2.59149900
 H                 -1.19794400   -0.17027400    2.39758300
 C                  4.90503500    1.14581200    0.01561600
 C                  4.39105600   -2.43304700   -0.02845000
 H                  3.50861700   -3.06412500   -0.05960600
 C                 -2.74913200   -2.35715700    0.46532800
 H                 -3.46372300   -3.07818000    0.07517500
 H                 -2.73687400   -2.46619300    1.55608600
 C                  6.67751200   -0.77459500    0.05252500
 H                  7.55815500   -0.14241000    0.08358600
 C                 -1.96933700    1.97340100   -3.56289900
 H                 -2.95786900    2.27517400   -3.21811200
 H                 -2.08790200    1.38670600   -4.47546100
 H                 -1.41753100    2.87578000   -3.83476400
 C                  3.29411300    3.41175400   -0.00880600
 H                  2.67878700    4.30513000   -0.01763600
 C                 -0.73054900    3.01367100    1.32837900
 H                 -0.51440400    3.47849000    2.28301800
 C                  6.80336800   -2.15361100    0.04568700
 H                  7.78610200   -2.60763200    0.07143600
 C                 -1.87142800    1.42845100    3.66786300
 H                 -2.90659000    1.49527300    3.33007100
 H                 -1.55448200    2.43045000    3.96581100
 H                 -1.83603500    0.79683400    4.55761700
 C                  4.69152900    3.53492300    0.03441700
 H                  5.14030000    4.52018600    0.05866500
 C                 -1.33758200   -2.60572500   -0.05595100
 C                 -1.29148500   -3.13391100   -1.49355500
 C                 -0.54780800   -3.54207100    0.85133300
 H                 -0.25572700   -3.19779000   -1.83297700
 H                 -1.83487500   -2.48924100   -2.18619900
 H                  0.46288900   -3.68911800    0.46499800
 H                 -0.46806200   -3.13265400    1.86105400
 H                 -1.73326000   -4.13244500   -1.52866600
 H                 -1.04763200   -4.51242200    0.90671400
 C                 -3.11430600   -0.89685800    0.14194400
 C                 -3.94203600   -0.30017900    1.29859600
 C                 -3.96099200   -0.73092600   -1.14101700
 H                 -3.35231100   -0.37519200    2.21672700
 C                 -5.20877200   -1.16124100    1.44982500
 C                 -4.40224100    1.14354900    1.07306000
 H                 -3.38641900   -1.07933800   -2.00337900
 C                 -5.25087000   -1.55453600   -1.02599300
 C                 -4.38048800    0.72760700   -1.35598600
 H                 -5.78357000   -0.77857700    2.29932700
 H                 -4.95523300   -2.19910700    1.67884500
 C                 -6.06235200   -1.08630200    0.18228600
 H                 -3.56164000    1.83583400    1.00387600
 H                 -5.00040100    1.44892400    1.93952000
 C                 -5.24308300    1.22336400   -0.19798800
 H                 -5.04843500   -2.62526200   -0.96829100
 H                 -5.83584700   -1.39679100   -1.93835300
 H                 -3.50959300    1.37483800   -1.43509500
 H                 -4.92967100    0.79636300   -2.30122400
 H                 -6.94382900   -1.72218500    0.29977000
 C                 -6.49059000    0.35974400   -0.05006700
 H                 -5.52800400    2.26267000   -0.38073500
 H                 -7.10690700    0.42648500   -0.95286600
 H                 -7.09386600    0.71585100    0.79171100
81
e-1-4
 Au                 0.76221800   -0.87459900    0.03496500
 N                  2.68401000   -0.31836500    0.00674700
 C                  4.98024700   -0.20597200    0.00116200
 C                 -1.49867500    1.70694600   -1.27193200
 N                 -2.06307200   -0.27739400    0.06984300
 C                 -1.24506500    3.07684800   -1.31687300
 H                 -1.09204300    3.55022100   -2.27954600
 C                  5.27992200   -2.96421700    0.09177200
 H                  5.41718600   -4.03847200    0.12741600
 C                 -1.17427900   -1.23662800    0.07263200
 C                  3.05575100    1.01043000   -0.03594200
 C                  0.02901100    0.98037700   -3.09302700
 H                  0.74860500    0.63000500   -2.35025200
 H                  0.29467300    2.00728900   -3.35591400
 H                  0.12773000    0.36530100   -3.98963800
 C                 -1.49372000    1.83974600    1.17572500
 C                 -1.14540500    3.82990900   -0.15893100
 H                 -0.94897400    4.89307100   -0.21695500
 C                  3.84844100   -1.05571800    0.02998600
 C                 -1.69220400    1.11911800   -0.01166300
 C                  0.03390300    1.27420200    3.05072800
 H                  0.73305600    0.81051800    2.35137700
 H                  0.12471700    0.77415700    4.01702900
 H                  0.33357800    2.31738800    3.17818000
 C                  5.04291100    2.40882800   -0.08213000
 H                  6.12175000    2.51951700   -0.08667000
 C                  2.23087800    2.13816600   -0.06999800
 H                  1.14942800    2.03197700   -0.06453800
 C                 -1.40855700    0.91994200   -2.56562400
 H                 -1.63883100   -0.12721800   -2.35531100
 C                 -1.40944300    1.19255100    2.54404500
 H                 -1.66543600    0.13430000    2.44801200
 C                  4.46360000    1.14058700   -0.04169600
 C                  3.99839500   -2.44284200    0.07570700
 H                  3.12480800   -3.08605700    0.09829400
 C                 -3.33795400   -2.22185600    0.37405400
 H                 -4.02571000   -2.81555300   -0.23076800
 H                 -3.55997900   -2.43175700    1.42469000
 C                  6.26280300   -0.75354500    0.01797700
 H                  7.13486000   -0.10918800   -0.00387500
 C                 -2.36238200    1.43125500   -3.64433900
 H                 -3.40328600    1.43391200   -3.31928000
 H                 -2.28284300    0.80876500   -4.53759800
 H                 -2.09988300    2.45108300   -3.93439700
 C                  2.82756700    3.38634300   -0.10984100
 H                  2.20103000    4.27149800   -0.13656700
 C                 -1.23694400    3.20529200    1.07407700
 H                 -1.07783000    3.77857400    1.97977800
 C                  6.40780600   -2.12985700    0.06308700
 H                  7.39713400   -2.56985300    0.07675300
 C                 -2.34913300    1.84022800    3.55994000
 H                 -3.38377700    1.86019800    3.21457500
 H                 -2.04418200    2.86943900    3.76156100
 H                 -2.31013100    1.29818700    4.50669400
 C                  4.22386400    3.52605600   -0.11608000
 H                  4.66166500    4.51602700   -0.14754300
 C                 -1.87000500   -2.57008800    0.07559800
 C                 -1.68210200   -3.17878900   -1.31815300
 C                 -1.26045400   -3.49438600    1.12335100
 H                 -0.62006600   -3.30916900   -1.53426200
 H                 -2.11258300   -2.54388500   -2.09606900
 H                 -0.21234800   -3.69322500    0.89086400
 H                 -1.30884100   -3.04513300    2.11791100
 H                 -2.17278600   -4.15396800   -1.35772900
 H                 -1.80282100   -4.44259900    1.14348200
 C                 -3.49745000   -0.71739100    0.11058100
 C                 -4.24729200   -0.01203900    1.23726500
 C                 -4.17800600   -0.38907800   -1.21884400
 C                 -5.71848300   -0.41162500    1.25196200
 H                 -4.16783400    1.07224300    1.09344700
 H                 -3.77610000   -0.25599200    2.19222300
 C                 -5.66157600   -0.74218400   -1.21456000
 H                 -4.06847300    0.68847900   -1.38705500
 H                 -3.66664000   -0.90159900   -2.03771900
 C                 -6.38384800   -0.05007900   -0.06795100
 H                 -6.22071300    0.07552300    2.08965900
 H                 -5.80349100   -1.49258900    1.41763000
 H                 -6.10009100   -0.46632300   -2.17552700
 H                 -5.78598700   -1.82632300   -1.11504500
 H                 -7.44046600   -0.32397200   -0.05780800
 H                 -6.33258700    1.03569200   -0.21026000
82
e-1-7
 Au                -0.83150500   -0.84837600   -0.05632300
 N                 -2.75014600   -0.28374200   -0.04376000
 C                 -5.04606100   -0.16432200   -0.03116100
 C                  1.40879600    1.58742000    1.32048900
 N                  2.03131600   -0.33883800   -0.07563100
 C                  1.14104800    2.95180200    1.40649500
 H                  0.94743000    3.38923400    2.37898300
 C                 -5.35425300   -2.92206300   -0.11343200
 H                 -5.49492000   -3.99597300   -0.14585100
 C                  1.09419600   -1.25842400   -0.08817600
 C                 -3.11793700    1.04576300   -0.00375400
 C                 -0.12796300    0.81120200    3.11011100
 H                 -0.85927400    0.56644400    2.33723200
 H                 -0.35065000    1.81762300    3.47342400
 H                 -0.25536200    0.11714000    3.94289600
 C                  1.51418800    1.81559800   -1.11897300
 C                  1.08397800    3.74752300    0.27258100
 H                  0.87397700    4.80582800    0.36312300
 C                 -3.91689100   -1.01770900   -0.06171900
 C                  1.66381700    1.05570100    0.04715100
 C                  0.12458400    1.25255400   -3.09401800
 H                 -0.59308900    0.74368000   -2.44629300
 H                  0.10487700    0.77955900   -4.07782200
 H                 -0.20606800    2.28818200   -3.20717000
 C                 -5.09844600    2.45182000    0.04721000
 H                 -6.17670600    2.56773400    0.05563100
 C                 -2.28759800    2.16892700    0.02348100
 H                 -1.20714700    2.05501200    0.01155300
 C                  1.30938400    0.74615200    2.58064800
 H                  1.52837200   -0.29389800    2.32447300
 C                  1.53893600    1.21030600   -2.50768900
 H                  1.83664300    0.16103000   -2.42697200
 C                 -4.52501800    1.18088500    0.00698200
 C                 -4.07110900   -2.40445800   -0.10319200
 H                 -3.19938900   -3.05035200   -0.12714200
 C                  3.15767600   -2.32063500   -0.54079300
 H                  3.87084200   -3.01641900   -0.10022300
 H                  3.23073100   -2.41166100   -1.63038700
 C                 -6.33023200   -0.70816800   -0.04188400
 H                 -7.20031800   -0.06122000   -0.01845400
 C                  2.26417400    1.18348700    3.69223300
 H                  3.31359700    1.04611900    3.43161700
 H                  2.06245300    0.60339500    4.59481800
 H                  2.11114800    2.23657600    3.93947200
 C                 -2.87833300    3.41988300    0.06414000
 H                 -2.24830600    4.30271100    0.08605400
 C                  1.23597200    3.17374800   -0.97964400
 H                  1.11548000    3.78179300   -1.86850400
 C                 -6.47945400   -2.08420300   -0.08288400
 H                 -7.47014900   -2.52123400   -0.09180600
 C                  2.51151700    1.92273100   -3.44620800
 H                  3.52633700    1.95464200   -3.04599400
 H                  2.18997600    2.95088500   -3.62608300
 H                  2.53775700    1.41617600   -4.41283500
 C                 -4.27404300    3.56541900    0.07619800
 H                 -4.70742700    4.55733300    0.10767400
 C                  1.72541500   -2.62020700   -0.10651400
 C                  1.66192500   -3.15680000    1.32820800
 C                  0.99632900   -3.56873400   -1.04713700
 H                  0.62813900   -3.18896700    1.67834000
 H                  2.23932000   -2.53239100    2.01408800
 H                 -0.02642000   -3.73469200   -0.70210100
 H                  0.94992400   -3.15984500   -2.05859600
 H                  2.07331000   -4.16845200    1.35400300
 H                  1.51450800   -4.53000700   -1.08277400
 C                  3.43234300   -0.85877400   -0.15964900
 C                  4.33344600   -0.60741400    1.07520100
 C                  4.41408800   -0.17513000   -1.13615600
 C                  5.62420500   -1.31310200    0.62884900
 C                  4.64405000    0.89598300    1.01177700
 H                  3.93461500   -0.95008400    2.03136600
 C                  5.64566600   -1.06620000   -0.90591600
 C                  4.74541600    1.18135700   -0.50544300
 H                  4.08209300   -0.14424200   -2.17417100
 H                  6.48785800   -0.87638000    1.13120100
 H                  5.62078600   -2.37759800    0.86363800
 H                  3.86397500    1.50720200    1.45629500
 H                  5.57029700    1.11351500    1.54623300
 H                  6.55426500   -0.56452500   -1.23905100
 H                  5.56890800   -2.00477300   -1.45655100
 H                  4.05054600    1.96692400   -0.79790400
 H                  5.74489800    1.50222800   -0.80461400
89
e-1-8
 Au                -1.40559800   -0.88686500    0.00057900
 N                 -3.27438300   -0.17076300    0.00068800
 C                 -5.55277600    0.13422100    0.00010700
 C                  1.05823300    1.57647800    1.22585100
 N                  1.45545800   -0.51516400    0.00020900
 C                  2.87044800   -1.05301000    0.00026800
 C                  0.96231200    2.96679800    1.19669800
 H                  0.85915300    3.50451800    2.13154300
 C                 -6.08384900   -2.59037700    0.00071300
 H                 -6.31102500   -3.64988300    0.00095800
 C                  0.49776700   -1.40283400    0.00050100
 C                 -3.53262000    1.18570300    0.00017100
 C                 -0.59329200    1.04994700    3.00588800
 H                 -1.30166400    0.65361900    2.27592000
 H                 -0.81926000    2.11029000    3.14614200
 H                 -0.75385200    0.53954000    3.95781100
 C                  1.05715800    1.57555600   -1.22682100
 C                  0.95500300    3.66304500   -0.00118000
 H                  0.88610900    4.74366400   -0.00159200
 C                 -4.49648700   -0.80807600    0.00055400
 C                  1.19713800    0.90798600   -0.00027800
 C                 -0.59526200    1.04794000   -3.00590300
 H                 -1.30351700    0.65211700   -2.27555500
 H                 -0.75611100    0.53698000   -3.95748200
 H                 -0.82118700    2.10821300   -3.14676100
 C                 -5.39738400    2.74550100   -0.00077600
 H                 -6.46342800    2.94480800   -0.00106500
 C                 -2.61713700    2.24228200   -0.00001600
 H                 -1.54753200    2.04939900    0.00032600
 C                  0.86033100    0.87562500    2.55458900
 H                  1.05074600   -0.19287400    2.42212500
 C                  0.85849300    0.87382700   -2.55499300
 H                  1.04895700   -0.19459600   -2.42193900
 C                 -4.92481100    1.43318300   -0.00017600
 C                 -4.76294900   -2.17843300    0.00085500
 H                 -3.94676700   -2.89343700    0.00120000
 C                  2.59831900   -2.57882100    0.00105000
 H                  3.05641700   -3.05071200    0.86548500
 H                  3.05662800   -3.05157200   -0.86282200
 C                 -6.87685600   -0.30366400   -0.00003200
 H                 -7.69146200    0.41229000   -0.00039300
 C                  1.79384600    1.41216300    3.63600200
 H                  2.82897900    1.44258000    3.29839600
 H                  1.73803300    0.78548500    4.52823300
 H                  1.49871500    2.42280400    3.92856800
 C                 -3.10889000    3.53607200   -0.00062600
 H                 -2.41108300    4.36657000   -0.00079500
 C                  0.96117300    2.96588000   -1.19854800
 H                  0.85712000    3.50294500   -2.13367200
 C                 -7.13742800   -1.66360900    0.00027400
 H                 -8.16033900   -2.01886500    0.00018800
 C                  1.79159200    1.40967500   -3.63714000
 H                  2.82681000    1.44052000   -3.29985600
 H                  1.49620900    2.42005700   -3.93035200
 H                  1.73564000    0.78232900   -4.52889400
 C                 -4.48869400    3.79147900   -0.00101000
 H                 -4.84263400    4.81491900   -0.00147300
 C                  1.07032200   -2.78857200    0.00118300
 C                  0.57283100   -3.52045100    1.24907100
 C                  0.57242600   -3.52241200   -1.24529400
 H                 -0.51275600   -3.62757600    1.21533700
 H                  0.82384300   -2.97297200    2.16090500
 H                 -0.51312800   -3.62977900   -1.21083100
 H                  0.82268200   -2.97632100   -2.15815900
 H                  1.02607000   -4.51310900    1.30020300
 H                  1.02583100   -4.51505000   -1.29521800
 C                  3.61592700   -0.59677900   -1.26200600
 C                  3.50487500   -1.30345900   -2.46250500
 C                  4.45501800    0.51910000   -1.23566500
 C                  4.25714400   -0.96999200   -3.57762700
 H                  2.81906000   -2.13713800   -2.54198300
 C                  5.22465600    0.84162500   -2.35306800
 C                  5.14726700    0.09480100   -3.51617100
 H                  4.15300200   -1.54722300   -4.48725600
 H                  5.89493400    1.69180900   -2.29444100
 H                  5.75988500    0.34969700   -4.37134500
 C                  3.61665100   -0.59565400    1.26165200
 C                  3.50665400   -1.30131200    2.46286600
 C                  4.45575300    0.52014700    1.23361000
 C                  4.25982600   -0.96684100    3.57706300
 H                  2.82098100   -2.13497700    2.54370400
 C                  5.22637200    0.84364600    2.35009000
 C                  5.14989800    0.09790200    3.51394600
 H                  4.15642100   -1.54326000    4.48729200
 H                  5.89666800    1.69371600    2.29010200
 H                  5.76324000    0.35352700    4.36838300
 C                  4.54405700    1.36110400   -0.00141500
 H                  5.47048100    1.93811600   -0.00182000
 H                  3.71952000    2.08834500   -0.00167900
88
e-1-15
 Au                -1.31104100   -0.79069900   -0.31683000
 N                 -3.23606900   -0.27076400   -0.15330800
 C                 -5.53240300   -0.17976300   -0.09921600
 C                  0.80268400    1.18262600    1.77472100
 N                  1.54928600   -0.27466500   -0.11471400
 C                  2.96426200   -0.68993800   -0.53095100
 C                  0.55404400    2.48156600    2.22089700
 H                  0.28327000    2.63012300    3.25947900
 C                 -5.82075700   -2.80637900   -0.95069600
 H                 -5.95366900   -3.82935100   -1.28229700
 C                  0.62005300   -1.12248400   -0.49860900
 C                 -3.61289800    0.99232900    0.25615900
 C                 -0.95223500   -0.00442300    3.10603700
 H                 -1.57657200   -0.17404800    2.22857800
 H                 -1.27343000    0.93388000    3.56483100
 H                 -1.13403500   -0.81043400    3.82005200
 C                  1.10230200    2.09086200   -0.48214900
 C                  0.60089800    3.56845300    1.36569300
 H                  0.40403800    4.56495300    1.74048800
 C                 -4.39738900   -0.98023600   -0.37289200
 C                  1.16755400    1.02030900    0.42594900
 C                 -0.24490500    2.02414500   -2.55972500
 H                 -0.92313400    1.28950500   -2.11908300
 H                 -0.22903200    1.88118300   -3.64234300
 H                 -0.65297700    3.01700000   -2.35218800
 C                 -5.60421700    2.30852500    0.70986000
 H                 -6.68326500    2.40646300    0.75671400
 C                 -2.79128900    2.07394000    0.58452400
 H                 -1.70972800    1.98361600    0.52558100
 C                  0.54038200    0.05713900    2.76333300
 H                  0.82295800   -0.89428800    2.30271500
 C                  1.17123700    1.91130100   -1.98627400
 H                  1.54978800    0.91069500   -2.20859800
 C                 -5.02090600    1.10541600    0.31249000
 C                 -4.54140600   -2.30125800   -0.80010300
 H                 -3.66509000   -2.90738900   -1.00562200
 C                  2.58952100   -1.68038000   -1.63528800
 H                  3.35689700   -2.42392500   -1.83861400
 H                  2.40326200   -1.12386500   -2.55842600
 C                 -6.81253500   -0.71022200   -0.25677100
 H                 -7.68723600   -0.10369400   -0.04904100
 C                  1.31203800    0.24041700    4.07727100
 H                  2.35335400    0.53354600    3.93362200
 H                  1.28846100   -0.68449800    4.65659300
 H                  0.83906300    1.01554100    4.68420800
 C                 -3.39194700    3.25699900    0.97857200
 H                 -2.76884800    4.10629000    1.23769300
 C                  0.83400700    3.36250500    0.01588900
 H                  0.78501700    4.19685700   -0.67317500
 C                 -6.95180900   -2.02065700   -0.68209300
 H                 -7.93930900   -2.44626300   -0.80949400
 C                  2.08608400    2.92421600   -2.67002200
 H                  3.06950000    2.96597400   -2.20212500
 H                  1.64782900    3.92447300   -2.64082100
 H                  2.21375300    2.65837800   -3.72120500
 C                 -4.78853500    3.37797500    1.04354500
 H                 -5.22940800    4.31718900    1.35370900
 C                  1.25801700   -2.29090100   -1.19613700
 C                  1.37768400   -3.43824600   -0.18582200
 C                  0.43101700   -2.74612100   -2.39153600
 H                  0.37879600   -3.78766200    0.08241200
 H                  1.89286500   -3.13985800    0.72790400
 H                 -0.53304100   -3.13895500   -2.06318800
 H                  0.24147300   -1.91552800   -3.07561400
 H                  1.92744500   -4.26752400   -0.63732300
 H                  0.96347300   -3.53220000   -2.93302000
 C                  3.85591200    0.46542900   -0.98149100
 C                  4.49046800    0.43627000   -2.22034600
 C                  4.18073600    1.49507000   -0.09411200
 C                  5.41674100    1.41350100   -2.57205600
 H                  4.28572700   -0.36144100   -2.92258800
 C                  5.09329100    2.47697900   -0.44738500
 H                  3.72516200    1.52766200    0.88840800
 C                  5.71982700    2.43822600   -1.68892900
 H                  5.90166900    1.36555100   -3.53876300
 H                  5.32326300    3.26882600    0.25388700
 H                  6.44014900    3.19909000   -1.96072300
 C                  3.73267600   -1.37298200    0.60372100
 C                  4.72088900   -2.31731400    0.32749600
 C                  3.53451400   -0.99775300    1.92418700
 C                  5.44021100   -2.91018900    1.35646100
 H                  4.95394600   -2.58945400   -0.69402300
 C                  4.24618100   -1.58979500    2.95916200
 H                  2.82392500   -0.21779400    2.13937200
 C                  5.19598900   -2.56220300    2.67935800
 H                  6.19758000   -3.64698100    1.12040300
 H                  4.05762600   -1.28367000    3.98124100
 H                  5.75228800   -3.03250400    3.47977300
88
f-1-1 coplanar S1
 Au                -0.13313400    1.48592600   -0.47994800
 N                  0.04228400    3.26197300    0.53549400
 C                  0.18859500    5.47342400    1.13221500
 C                 -1.14636900   -1.36559800    1.60002800
 N                 -0.04862800   -1.40713700   -0.59414800
 C                 -0.00812500   -2.68587600   -1.39642500
 C                 -1.08518900   -1.44884200    2.99550100
 H                 -2.00369900   -1.44538300    3.56664200
 C                 -0.29220600    6.34289900   -1.47141600
 H                 -0.47574800    6.70710100   -2.47299400
 C                 -0.20663500   -0.33093300   -1.31004000
 C                  0.29818900    3.30864700    1.86912000
 C                  1.32253900   -1.42159900    1.46499800
 C                  0.16578000   -1.56851700    3.62265100
 C                 -0.02681000    4.55227900    0.07568100
 C                  0.03360000   -1.36421900    0.84918400
 C                  0.66822000    4.90968500    3.64322600
 H                  0.75747100    5.92217400    4.01655700
 C                  0.45426100    2.21987900    2.74091300
 H                  0.36831700    1.20138400    2.38045000
 C                  0.40475800    4.65540500    2.31888400
 C                 -0.26820900    4.97474100   -1.23056900
 H                 -0.42845500    4.24956000   -2.01837000
 C                  0.13580200   -2.12185400   -2.81642000
 H                 -0.40696000   -2.72596300   -3.54553700
 H                  1.19557200   -2.12065100   -3.09014800
 C                  0.16108100    6.82621500    0.87575800
 H                  0.32332100    7.55134200    1.66342700
 C                  0.72063500    2.50081100    4.07111000
 H                  0.84900300    1.68513200    4.76915400
 C                  1.32021100   -1.57021100    2.88316200
 H                  2.27544200   -1.63111100    3.38982500
 C                 -0.08198700    7.25394600   -0.43822400
 H                 -0.10575700    8.31392600   -0.65315200
 C                 -1.30097000   -3.46726700   -1.18664500
 H                 -1.35990000   -3.83276200   -0.15987400
 H                 -1.29537600   -4.33082600   -1.85338600
 H                 -2.19160800   -2.87264500   -1.39391600
 C                  0.82604700    3.81863400    4.51745900
 H                  1.03593300    4.00873900    5.56156700
 C                  1.15947200   -3.58024100   -1.01061000
 H                  2.12121400   -3.11243200   -1.21819400
 H                  1.08624000   -4.49695500   -1.59955000
 H                  1.11407000   -3.85001700    0.04649300
 C                 -0.36142200   -0.66959800   -2.76558400
 C                 -1.83765100   -0.50768700   -3.14583500
 H                 -2.17282100    0.51196400   -2.93769600
 H                 -1.95468900   -0.69468300   -4.21557100
 H                 -2.48672500   -1.19557600   -2.60411600
 C                  0.47380400    0.26436900   -3.63421600
 H                  0.41234300   -0.05306600   -4.67753300
 H                  0.09888400    1.28835000   -3.56180300
 H                  1.52155700    0.25719700   -3.33343000
 C                  2.58516400   -1.43794900    0.75857100
 C                  3.62374600   -2.28658300    1.23182600
 C                  2.88999700   -0.68031000   -0.40183500
 C                  4.82567000   -2.39743800    0.57602000
 H                  3.44354100   -2.91085800    2.09729900
 C                  4.10594000   -0.80923000   -1.04540000
 H                  2.19154200    0.05567600   -0.77205800
 C                  5.10367200   -1.66974000   -0.59008000
 H                  6.05601200   -1.75408000   -1.09321000
 C                 -2.50730200   -1.42911500    1.00023800
 C                 -3.29699700   -2.54041700    1.28259700
 C                 -3.05163400   -0.42305400    0.20215900
 C                 -4.56617200   -2.67469900    0.73203500
 H                 -2.89741200   -3.32514700    1.91609100
 C                 -4.32145600   -0.56112000   -0.33883700
 H                 -2.48429700    0.47749700    0.00909700
 C                 -5.08803000   -1.69320800   -0.09342500
 H                 -6.07479100   -1.79723500   -0.52578000
 C                 -5.33565300   -3.93164700    1.02778100
 C                 -4.90218800    0.50953100   -1.22036400
 F                 -6.55916800   -3.91441900    0.49566900
 F                 -4.70424700   -5.01101100    0.54391100
 F                 -5.47107500   -4.12615000    2.34476800
 F                 -5.10005900    0.05977900   -2.46913600
 F                 -4.11032000    1.58252800   -1.30906800
 F                 -6.09229000    0.92618500   -0.77336400
 C                  5.88566300   -3.33250600    1.07845500
 C                  4.34601700   -0.02595300   -2.30144800
 F                  6.18904500   -4.27289100    0.16903600
 F                  5.53166500   -3.97247400    2.19804400
 F                  7.03123300   -2.68463000    1.34268100
 F                  5.63881800    0.24347000   -2.50066700
 F                  3.69266400    1.14684500   -2.31224000
 F                  3.92551200   -0.69805400   -3.39385800
 H                  0.22068100   -1.65563400    4.70101700
88
f-1-1 rotated S1
 Au                 0.09566000    1.54334900    0.38922400
 N                  0.06219900    3.44723400   -0.38138000
 C                  0.72882600    5.46770200   -1.25983500
 C                  1.12873300   -1.52170400   -1.64946600
 N                 -0.08461700   -1.44525500    0.49255800
 C                 -0.14479900   -2.64803800    1.35884100
 C                  1.10329800   -1.58062000   -3.04273700
 H                  2.04524600   -1.62813900   -3.57648200
 C                  3.41792500    4.74529300   -1.20930600
 H                  4.46891200    4.49093900   -1.19664000
 C                  0.12162700   -0.26374000    1.17939700
 C                 -1.05770900    4.21135800   -0.58201500
 C                 -1.29654800   -1.48662100   -1.63427300
 C                 -0.09768600   -1.58393500   -3.73647300
 C                  1.13796400    4.19472700   -0.78389000
 C                 -0.07883800   -1.47684600   -0.92850500
 C                 -1.71270200    6.39432500   -1.39847300
 H                 -1.48106000    7.36750000   -1.81341500
 C                 -2.38156000    3.85996400   -0.30809800
 H                 -2.61284700    2.88958300    0.11166400
 C                 -0.72254400    5.47872400   -1.12648100
 C                  2.48382900    3.82403800   -0.75371500
 H                  2.77343300    2.85128700   -0.37896300
 C                 -0.36276400   -1.99331600    2.72924400
 H                  0.06698000   -2.59043800    3.53709600
 H                 -1.44193600   -1.90858000    2.90211700
 C                  1.66707500    6.36885700   -1.70820900
 H                  1.37859900    7.34628500   -2.07469600
 C                 -3.36838600    4.79679100   -0.58757200
 H                 -4.40341600    4.55797900   -0.38479800
 C                 -1.28546700   -1.54600300   -3.03205300
 H                 -2.23145500   -1.54388200   -3.56036300
 C                  3.01952200    5.99540300   -1.67931200
 H                  3.76849300    6.69436100   -2.02754300
 C                  1.14455100   -3.46922800    1.28909400
 H                  1.23664300   -3.94359200    0.30845700
 H                  1.11120100   -4.26011800    2.04134500
 H                  2.03437500   -2.86373600    1.45958800
 C                 -3.04320900    6.04122600   -1.12360600
 H                 -3.83220500    6.75186200   -1.33162600
 C                 -1.29572600   -3.58180600    1.00131200
 H                 -2.26622500   -3.10914500    1.15683000
 H                 -1.24152100   -4.46748800    1.63761600
 H                 -1.22321000   -3.91485000   -0.03806000
 C                  0.22669900   -0.57577700    2.65308400
 C                  1.68124700   -0.51619700    3.13870900
 H                  2.07689600    0.49111100    2.98549100
 H                  1.73671800   -0.75214100    4.20624700
 H                  2.32616000   -1.21237600    2.60274300
 C                 -0.58356900    0.40527300    3.49718700
 H                 -0.55648200    0.11787100    4.55226100
 H                 -0.16793500    1.41204000    3.40594600
 H                 -1.62385400    0.43540200    3.16709900
 C                 -2.61440000   -1.52723900   -0.95571500
 C                 -3.55330200   -2.46686400   -1.37717700
 C                 -2.96091800   -0.67605200    0.09650900
 C                 -4.79379500   -2.56513800   -0.75924800
 H                 -3.30104700   -3.15789800   -2.17431500
 C                 -4.20041300   -0.78492400    0.70539800
 H                 -2.25069800    0.06958500    0.44093800
 C                 -5.13249400   -1.73126600    0.29121700
 H                 -6.09918100   -1.80558600    0.76966700
 C                  2.46431700   -1.63302000   -1.00121800
 C                  3.21536000   -2.77880300   -1.23888900
 C                  3.01579700   -0.63057300   -0.20114200
 C                  4.46038400   -2.95350100   -0.64485200
 H                  2.80835500   -3.56188600   -1.87013600
 C                  4.26286400   -0.80999500    0.37764400
 H                  2.45503300    0.27730900   -0.02061300
 C                  4.99188700   -1.97647900    0.17784000
 H                  5.96076000   -2.10842700    0.64200500
 C                  5.19178700   -4.24065100   -0.90006400
 C                  4.87015100    0.25580500    1.24698200
 F                  6.40122600   -4.25828100   -0.33687900
 F                  4.51169200   -5.29160800   -0.42081500
 F                  5.35557100   -4.45952500   -2.21169700
 F                  5.03088200   -0.16608900    2.50731100
 F                  4.12811700    1.36681700    1.29020400
 F                  6.08677100    0.61054700    0.80724600
 C                 -5.74828500   -3.61520100   -1.25580600
 C                 -4.52870000    0.10100800    1.87493000
 F                 -5.23861700   -4.84606800   -1.11435600
 F                 -6.01052100   -3.45919800   -2.56076600
 F                 -6.91459500   -3.58935500   -0.60835700
 F                 -5.84172200    0.33779700    1.96880400
 F                 -3.91537800    1.28889500    1.79629500
 F                 -4.15244600   -0.45461700    3.03591800
 H                 -0.10393800   -1.61882700   -4.81808800
88
f-1-1 coplanar T1
 Au                -0.25877400    1.54128300   -0.44710900
 N                 -0.39872400    3.34802400    0.51619800
 C                 -0.65736700    5.57451100    1.02225900
 C                 -0.93949200   -1.44961800    1.59848400
 N                  0.21734200   -1.37296500   -0.57552100
 C                  0.37432800   -2.58729700   -1.41354600
 C                 -0.87947900   -1.42563100    2.99165200
 H                 -1.80152200   -1.52877800    3.55149300
 C                 -1.07052300    6.25137400   -1.65149300
 H                 -1.23424900    6.54387100   -2.67969400
 C                 -0.15629600   -0.24732700   -1.28072400
 C                 -0.26033000    3.49038100    1.87170800
 C                  1.47512200   -1.20110200    1.51636800
 C                  0.33458300   -1.28881600    3.65297600
 C                 -0.63861600    4.58864400   -0.00068100
 C                  0.24551900   -1.34428900    0.84532300
 C                 -0.29615400    5.19107400    3.58906900
 H                 -0.40245000    6.21817400    3.91555200
 C                 -0.00690500    2.47771600    2.79883900
 H                  0.09758500    1.44851300    2.47463200
 C                 -0.40631500    4.84599700    2.26139600
 C                 -0.84427900    4.91677100   -1.34289700
 H                 -0.82426900    4.14364500   -2.10012800
 C                  0.48897400   -1.94705200   -2.80380700
 H                  0.10669200   -2.60741800   -3.58584500
 H                  1.54843200   -1.75318800   -3.00671900
 C                 -0.88250700    6.89186700    0.69792000
 H                 -0.90151600    7.66403100    1.45693100
 C                  0.10132700    2.84477500    4.13410300
 H                  0.29747900    2.08639300    4.88053800
 C                  1.49951700   -1.18631900    2.91676000
 H                  2.45346600   -1.07536700    3.41864100
 C                 -1.08983100    7.22238700   -0.65133300
 H                 -1.26853100    8.25517000   -0.91992200
 C                 -0.83016400   -3.52268100   -1.29025700
 H                 -0.84902700   -3.98618400   -0.30054800
 H                 -0.74635100   -4.32003800   -2.03169800
 H                 -1.77626700   -3.00328500   -1.44154800
 C                 -0.04013700    4.17544400    4.52423000
 H                  0.04876000    4.43324300    5.57137600
 C                  1.61767500   -3.39672200   -1.06528900
 H                  2.53523800   -2.84125100   -1.26237200
 H                  1.62941000   -4.30292300   -1.67425100
 H                  1.60459800   -3.70299300   -0.01525800
 C                 -0.24870700   -0.59789100   -2.74422300
 C                 -1.70766500   -0.69820700   -3.20833100
 H                 -2.20680500    0.26247000   -3.05714800
 H                 -1.75241200   -0.94876500   -4.27290300
 H                 -2.26827700   -1.45309000   -2.65732200
 C                  0.44445500    0.44997800   -3.61242100
 H                  0.43032600    0.14973400   -4.66407200
 H                 -0.07177000    1.40995200   -3.52306400
 H                  1.48085000    0.59154500   -3.30006700
 C                  2.77258400   -1.15839500    0.79997600
 C                  3.80219100   -1.98910500    1.23681300
 C                  3.01022600   -0.33611500   -0.30499500
 C                  5.02782300   -2.01223400    0.58207200
 H                  3.63523500   -2.65765000    2.07457800
 C                  4.23484900   -0.37104100   -0.95046000
 H                  2.23101100    0.33199500   -0.65813300
 C                  5.25861600   -1.21062800   -0.52087400
 H                  6.21240100   -1.22737600   -1.02973600
 C                 -2.26747700   -1.73199900    0.98542400
 C                 -2.86137700   -2.95865800    1.25803300
 C                 -2.95546200   -0.82091800    0.18142500
 C                 -4.08126200   -3.30419500    0.68586900
 H                 -2.34749600   -3.67095000    1.89518700
 C                 -4.17623000   -1.17167900   -0.37548900
 H                 -2.53014200    0.15368700   -0.01398000
 C                 -4.74339400   -2.41982000   -0.14678300
 H                 -5.69110300   -2.68546400   -0.59735100
 C                 -4.63294300   -4.67146300    0.97078100
 C                 -4.92627400   -0.20820900   -1.25342100
 F                 -5.83047200   -4.86309700    0.41490900
 F                 -3.81873400   -5.63150200    0.50837300
 F                 -4.76164400   -4.88488200    2.28742800
 F                 -5.07235000   -0.69015400   -2.49614700
 F                 -4.31746700    0.97429800   -1.35262000
 F                 -6.16335600    0.01650100   -0.78739300
 C                  6.08956100   -2.93944200    1.10443100
 C                  4.44700100    0.47147900   -2.17809600
 F                  7.20248100   -2.90442800    0.36981900
 F                  5.66279000   -4.20912800    1.12685200
 F                  6.43117000   -2.63071600    2.36347500
 F                  5.73145200    0.81028300   -2.33409900
 F                  3.73467400    1.59990000   -2.14640000
 F                  4.08529200   -0.18891300   -3.29086200
 H                  0.36797900   -1.27120400    4.73493300
93
f-5-1 coplanar S1
 Au                 0.07529500    1.52570400    0.28624000
 N                 -0.14732100    3.32412900   -0.67815000
 C                 -0.37648600    5.54704300   -1.20199800
 C                  1.09767700   -1.25916700   -1.86965300
 N                  0.05092600   -1.37154700    0.34434800
 C                  0.05574400   -2.66478900    1.12364200
 C                  1.00599500   -1.29876500   -3.26638700
 H                  1.91087700   -1.26643200   -3.85799900
 C                  0.04651900    6.34596300    1.43417000
 H                  0.20667500    6.68293100    2.44919200
 C                  0.19664700   -0.30536900    1.07679200
 C                 -0.39600900    3.40563200   -2.01150800
 C                 -1.36754000   -1.35432200   -1.68044100
 C                 -0.25784600   -1.41265300   -3.86757000
 C                 -0.13421700    4.59989700   -0.17470700
 C                 -0.06527500   -1.29599700   -1.09495100
 C                 -0.81534900    5.04949400   -3.73460500
 H                 -0.94075500    6.06967100   -4.07516200
 C                 -0.50778400    2.34111800   -2.91897300
 H                 -0.38928600    1.31513000   -2.59039500
 C                 -0.55095700    4.76156600   -2.41728200
 C                  0.07899600    4.98684100    1.14735100
 H                  0.26107900    4.24214700    1.91193400
 C                 -0.07742300   -2.12974000    2.55628500
 H                  0.49077800   -2.72823100    3.27088200
 H                 -1.13382700   -2.15809900    2.84511800
 C                 -0.40462400    6.89040800   -0.90007000
 H                 -0.58836400    7.63493100   -1.66457400
 C                 -0.77601500    2.65558800   -4.24116600
 H                 -0.87129200    1.85913100   -4.96621400
 C                 -1.39553300   -1.45356900   -3.10338600
 H                 -2.36086200   -1.51043700   -3.59088600
 C                 -0.19036400    7.28251800    0.42999000
 H                 -0.21037900    8.33473100    0.68051600
 C                  1.36202500   -3.41338200    0.87826400
 H                  1.40681400   -3.76918500   -0.15262900
 H                  1.39035200   -4.28197800    1.53773800
 H                  2.24359100   -2.80044400    1.07103100
 C                 -0.92663300    3.98277700   -4.64515000
 H                 -1.13683900    4.19925700   -5.68405100
 C                 -1.09574100   -3.58128900    0.73987300
 H                 -2.06558400   -3.14676700    0.97912600
 H                 -0.98425000   -4.51002100    1.30331900
 H                 -1.06514300   -3.82318400   -0.32454600
 C                 -2.61020200   -1.43091400   -0.94307700
 C                 -3.63582300   -2.29159300   -1.42377800
 C                 -2.90562000   -0.73504400    0.25874500
 C                 -4.80900800   -2.47907500   -0.73514600
 H                 -3.46349100   -2.86758000   -2.32362200
 C                 -4.09163900   -0.94402700    0.93730800
 H                 -2.22396000    0.01101900    0.64042500
 C                 -5.07130100   -1.82116500    0.47619500
 H                 -5.99944500   -1.96977300    1.00847800
 C                  2.47001400   -1.33367700   -1.29765100
 C                  3.26097000   -2.42664200   -1.64226800
 C                  3.02127300   -0.36282900   -0.46064100
 C                  4.53753100   -2.58111400   -1.11562400
 H                  2.85507600   -3.18360400   -2.30487300
 C                  4.30005200   -0.52012000    0.05497300
 H                  2.45329700    0.52581700   -0.21874000
 C                  5.06709300   -1.63649400   -0.25280900
 H                  6.06092400   -1.75503700    0.15885200
 C                  5.30828500   -3.81886500   -1.48123800
 C                  4.88987900    0.50999400    0.97827800
 F                  6.53370100   -3.82760100   -0.95324900
 F                  4.68055600   -4.92377600   -1.05408900
 F                  5.43959200   -3.94181100   -2.80727600
 F                  5.02131800    0.03177100    2.22693200
 F                  4.14036700    1.61325000    1.05747900
 F                  6.11250200    0.88283500    0.58529600
 C                 -5.85530500   -3.42145100   -1.25169000
 C                 -4.30919000   -0.23384700    2.24011100
 F                 -5.49674700   -4.03191800   -2.38615400
 F                 -7.01318300   -2.78760100   -1.49750100
 F                 -6.13874500   -4.38483800   -0.36026600
 F                 -5.60188600   -0.08586700    2.53834300
 F                 -3.75721200    0.98986400    2.25992300
 F                 -3.75657000   -0.90814800    3.27286200
 H                 -0.33671800   -1.46478700   -4.94679200
 C                  0.38233700   -0.66547500    2.51800600
 C                  1.85937300   -0.46917800    2.89155800
 C                 -0.44804100    0.23799600    3.43168000
 C                  2.06644600   -0.56588200    4.37486700
 H                  2.19417300    0.50982000    2.52262200
 H                  2.48385900   -1.20976600    2.38453400
 C                 -0.34977800   -0.24562300    4.87137000
 H                 -0.05292300    1.25755600    3.35296400
 H                 -1.48660100    0.26032700    3.09776800
 C                  1.07664800   -0.49508800    5.26072500
 H                  3.08641300   -0.71573600    4.71295400
 H                 -0.79416400    0.49262100    5.54308900
 H                 -0.94361300   -1.15810000    5.00562800
 H                  1.29797600   -0.60812300    6.31680100
93
f-5-1 rotated S1
 Au                 0.07811000    1.56135600    0.20850800
 N                  0.02506800    3.47774500   -0.52855200
 C                  0.66671300    5.50121100   -1.41816900
 C                  1.08434000   -1.43441900   -1.90125100
 N                 -0.10523600   -1.42598100    0.25565300
 C                 -0.13834000   -2.64586200    1.09910500
 C                  1.04050600   -1.45134400   -3.29504400
 H                  1.97544000   -1.47443500   -3.84257300
 C                  3.35483300    4.77522500   -1.45694600
 H                  4.40535100    4.51956700   -1.47867900
 C                  0.13223800   -0.26257600    0.95950300
 C                 -1.09922300    4.24435900   -0.68880600
 C                 -1.34194300   -1.42291600   -1.85391200
 C                 -0.17016400   -1.44690500   -3.97276900
 C                  1.08899200    4.22547200   -0.96210100
 C                 -0.11486000   -1.42318000   -1.16533600
 C                 -1.77642900    6.43211300   -1.47361600
 H                 -1.55672200    7.40675500   -1.89154200
 C                 -2.41431300    3.89362200   -0.37371800
 H                 -2.63351600    2.92151800    0.04883600
 C                 -0.77961900    5.51387000   -1.23773800
 C                  2.43439200    3.85288400   -0.97620800
 H                  2.73496700    2.87812900   -0.61522100
 C                 -0.33696800   -2.02048700    2.48570200
 H                  0.10822900   -2.62735100    3.27789600
 H                 -1.41498100   -1.94599500    2.67641800
 C                  1.59127900    6.40323800   -1.89228200
 H                  1.29265000    7.38273300   -2.24481400
 C                 -3.40790400    4.83314000   -0.61711000
 H                 -4.43635000    4.59504000   -0.38253600
 C                 -1.34925300   -1.44255600   -3.25287600
 H                 -2.30199500   -1.43505100   -3.76890500
 C                  2.94340300    6.02784000   -1.90842200
 H                  3.68183400    6.72739600   -2.27727900
 C                  1.15860900   -3.45068300    0.99376600
 H                  1.23756500   -3.91383800    0.00682300
 H                  1.15039500   -4.24876900    1.73898400
 H                  2.04320900   -2.83404000    1.15306000
 C                 -3.09793700    6.07958500   -1.15773800
 H                 -3.89210300    6.79224300   -1.33708600
 C                 -1.28565100   -3.58375200    0.74259200
 H                 -2.25814400   -3.12488700    0.92497700
 H                 -1.21062300   -4.48164000    1.35935200
 H                 -1.22833200   -3.89425300   -0.30467200
 C                 -2.64686700   -1.49332000   -1.15380100
 C                 -3.58701300   -2.42757100   -1.58455600
 C                 -2.97710800   -0.67896300   -0.06755900
 C                 -4.81219700   -2.55760500   -0.94195200
 H                 -3.34527400   -3.09259900   -2.40660600
 C                 -4.20039400   -0.82071000    0.56694800
 H                 -2.26673700    0.06361200    0.28382100
 C                 -5.13323500   -1.76258300    0.14356000
 H                 -6.08636200   -1.86423000    0.64354200
 C                  2.42708300   -1.56455500   -1.27046100
 C                  3.16590400   -2.71058900   -1.54172400
 C                  2.99411400   -0.58647500   -0.45048600
 C                  4.41201700   -2.91354900   -0.95849400
 H                  2.74715000   -3.47366800   -2.18956000
 C                  4.24319200   -0.79320100    0.11673900
 H                  2.44635700    0.32445700   -0.24874200
 C                  4.95747400   -1.96298400   -0.11414000
 H                  5.92745000   -2.11648800    0.34091800
 C                  5.12755300   -4.20193800   -1.24837400
 C                  4.86525900    0.24447300    1.00903400
 F                  6.33809000   -4.24811300   -0.68904500
 F                  4.43627800   -5.25687200   -0.79410900
 F                  5.28566100   -4.38964800   -2.56559000
 F                  4.95857900   -0.18148100    2.27595700
 F                  4.17185000    1.38791400    1.02487900
 F                  6.11189500    0.54358200    0.61729200
 C                 -5.77818200   -3.58602900   -1.46120800
 C                 -4.50499300    0.02140100    1.77447600
 F                 -5.21190000   -4.79732600   -1.53448900
 F                 -6.19452900   -3.28423600   -2.69924800
 F                 -6.86375900   -3.69682000   -0.69327600
 F                 -5.81899300    0.20826800    1.93598500
 F                 -3.93756500    1.23251300    1.70069500
 F                 -4.05457700   -0.54990200    2.90207900
 H                 -0.19015400   -1.45027100   -5.05478800
 C                  0.23973800   -0.59692100    2.42458800
 C                  1.69433300   -0.51717600    2.91869500
 C                 -0.57390200    0.36389400    3.29827200
 C                  1.80159900   -0.62955000    4.41194900
 H                  2.11595900    0.43740400    2.57750200
 H                  2.30370700   -1.29353900    2.44786500
 C                 -0.60382900   -0.10218500    4.74839500
 H                 -0.11112500    1.35550900    3.23507500
 H                 -1.58625800    0.45350200    2.89490700
 C                  0.76767100   -0.46626800    5.23298400
 H                  2.77902300   -0.86630500    4.82089500
 H                 -1.02649800    0.67881500    5.38620000
 H                 -1.27672100   -0.96306900    4.85471400
 H                  0.90835800   -0.58949600    6.30216200
93
f-5-1 coplanar T1
 Au                 0.26627800    1.56749400    0.24879600
 N                  0.41593000    3.39667000   -0.66888300
 C                  0.70600700    5.63176800   -1.11685700
 C                  0.85720200   -1.37615200   -1.86823600
 N                 -0.25189300   -1.34296600    0.32981500
 C                 -0.39805600   -2.57056000    1.14970200
 C                  0.76769700   -1.30796000   -3.25839700
 H                  1.67572600   -1.40543500   -3.84166700
 C                  1.21518500    6.21927500    1.56144000
 H                  1.41676000    6.47720100    2.59216000
 C                  0.15888000   -0.23794300    1.04481900
 C                  0.23945900    3.58253700   -2.01455100
 C                 -1.55300000   -1.10290700   -1.72602700
 C                 -0.45896000   -1.13638500   -3.88790200
 C                  0.69804300    4.61625000   -0.12333500
 C                 -0.31067800   -1.27952600   -1.08846400
 C                  0.25865800    5.33262000   -3.68156100
 H                  0.37639400    6.36665900   -3.98107600
 C                 -0.06316700    2.60327200   -2.96242900
 H                 -0.17928900    1.56733300   -2.66490300
 C                  0.40199400    4.94601200   -2.36856600
 C                  0.95184800    4.89927700    1.22081800
 H                  0.93953900    4.10409500    1.95511300
 C                 -0.49021700   -1.95315500    2.55176200
 H                 -0.10280100   -2.62405000    3.32236500
 H                 -1.54723200   -1.75558700    2.76932400
 C                  0.96833400    6.93404600   -0.76094000
 H                  0.98007600    7.72826100   -1.49699300
 C                 -0.20409900    3.01193000   -4.28240200
 H                 -0.43853800    2.28032600   -5.04436100
 C                 -1.60743400   -1.04478100   -3.12440400
 H                 -2.57049000   -0.90961200   -3.60240300
 C                  1.22380300    7.21943800    0.59032900
 H                  1.43210000    8.23987900    0.88362500
 C                  0.80327800   -3.50569200    0.99545600
 H                  0.79891100   -3.96857000    0.00539400
 H                  0.73775700   -4.30310500    1.73858300
 H                  1.75216300   -2.98483800    1.12432300
 C                 -0.04677500    4.35062100   -4.63759800
 H                 -0.16203100    4.64134300   -5.67348700
 C                 -1.64692400   -3.37307400    0.80557100
 H                 -2.56194800   -2.82483400    1.03241100
 H                 -1.64578600   -4.29362100    1.39263800
 H                 -1.65233200   -3.65413500   -0.25159600
 C                 -2.83192100   -1.07790700   -0.97571300
 C                 -3.87572500   -1.88981200   -1.41458400
 C                 -3.03619500   -0.29844600    0.16631900
 C                 -5.08175400   -1.93769200   -0.72575500
 H                 -3.73419500   -2.52571800   -2.28189400
 C                 -4.24111700   -0.35958500    0.84709500
 H                 -2.24627400    0.35666400    0.52078400
 C                 -5.27811900   -1.18139300    0.41527900
 H                 -6.21594100   -1.21925500    0.95167400
 C                  2.18936700   -1.70506300   -1.28758600
 C                  2.74685600   -2.93680500   -1.60920700
 C                  2.91098200   -0.84082700   -0.46036500
 C                  3.96182600   -3.33637700   -1.06231500
 H                  2.20653200   -3.61220900   -2.26440700
 C                  4.12731900   -1.24533800    0.07088000
 H                  2.51722100    0.13935500   -0.23026400
 C                  4.65612600   -2.50055000   -0.20612600
 H                  5.60107900   -2.80754400    0.22333900
 C                  4.47207400   -4.70748300   -1.40039200
 C                  4.91247600   -0.33605300    0.97548900
 F                  5.66747500   -4.95281800   -0.86129200
 F                  3.63391800   -5.66006900   -0.96605700
 F                  4.58539000   -4.87715800   -2.72482200
 F                  4.97805000   -0.82235600    2.22458600
 F                  4.38727300    0.88759900    1.05204900
 F                  6.17864500   -0.20339700    0.55617200
 C                 -6.15957300   -2.84386500   -1.25212600
 C                 -4.41040400    0.43344300    2.11385000
 F                 -5.73902400   -4.11372000   -1.32510800
 F                 -6.52933900   -2.49377400   -2.49218200
 F                 -7.25459700   -2.82839100   -0.49042000
 F                 -5.69434400    0.71099800    2.36232800
 F                 -3.74890400    1.59266800    2.07516000
 F                 -3.94937200   -0.24358400    3.18011400
 H                 -0.51522000   -1.08470400   -4.96784600
 C                  0.25208000   -0.60649200    2.50030900
 C                  1.71311600   -0.70653900    2.96942200
 C                 -0.42916900    0.43380700    3.39586600
 C                  1.82986300   -0.84166400    4.46010500
 H                  2.24363000    0.19073800    2.62437000
 H                  2.21563100   -1.54863300    2.48578300
 C                 -0.49216000   -0.04093800    4.84161100
 H                  0.14889600    1.36388300    3.33274600
 H                 -1.42897700    0.64907200    3.01025100
 C                  0.83512100   -0.56715300    5.29990200
 H                  2.77946200   -1.19428700    4.85061900
 H                 -0.81207100    0.77655500    5.49341000
 H                 -1.26012100   -0.81798300    4.94920400
 H                  0.97776800   -0.71625100    6.36551500
62
r-1-1 coplanar S1
 Au                 0.97647400    1.15378900   -0.02922600
 N                  2.51878000   -0.19971300    0.12573100
 C                  4.56902500   -1.23693300    0.17945100
 C                 -2.29741400   -0.07463900    1.15987000
 N                 -1.82219600    1.83092900   -0.25274100
 C                 -2.92696200    2.83143300   -0.35921700
 C                 -2.66229800   -1.45804600    1.28928300
 C                  5.93709300    1.17360100    0.44282400
 H                  6.49122800    2.09700600    0.54532900
 C                 -0.62035800    2.32085400   -0.22304700
 C                  2.30472900   -1.52882200    0.00264000
 C                 -2.09953300   -0.36332300   -1.25677000
 C                 -2.72485700   -2.25951600    0.15986100
 C                  3.87763500   -0.00109400    0.22416000
 C                 -2.08378200    0.41781500   -0.11217100
 C                  3.51581600   -3.61841100   -0.09974700
 H                  4.42940500   -4.19971600   -0.08663800
 C                  1.06449200   -2.17278800   -0.15514700
 H                  0.14582000   -1.60101500   -0.17122100
 C                  3.53454800   -2.25175600    0.02870900
 C                  4.54919300    1.21017800    0.35478900
 H                  3.99603500    2.14064200    0.38473800
 C                 -2.13213000    4.10719200   -0.67749100
 H                 -2.53998700    4.97167700   -0.15068600
 H                 -2.18987700    4.30998400   -1.75016100
 C                  5.94475300   -1.25543300    0.26775700
 H                  6.49641300   -2.18685600    0.23495900
 C                  1.07305200   -3.54959300   -0.29407200
 H                  0.13801700   -4.07503700   -0.43208100
 C                 -2.44374000   -1.75000000   -1.09755200
 C                  6.62453400   -0.03692900    0.40079800
 H                  7.70421300   -0.03732400    0.47108700
 C                 -3.68369900    2.91657700    0.96159500
 H                 -4.18864200    1.97528500    1.17859900
 H                 -4.43343700    3.70649200    0.88820000
 H                 -3.01480000    3.15011400    1.79125100
 C                  2.27287200   -4.26202900   -0.26269100
 H                  2.25110500   -5.33828700   -0.37069200
 C                 -3.88014800    2.43974500   -1.47614800
 H                 -3.34591900    2.32093900   -2.42029300
 H                 -4.62956200    3.22475500   -1.59413200
 H                 -4.38836500    1.50328300   -1.24357700
 C                 -0.67046200    3.82433100   -0.28823400
 C                 -0.30400900    4.36220700    1.09840100
 H                  0.70850100    4.05357400    1.36705100
 H                 -0.34533900    5.45375100    1.08651900
 H                 -0.98417000    3.99761300    1.86932900
 C                  0.32262700    4.35954400   -1.31395800
 H                  0.23919000    5.44683500   -1.37927500
 H                  1.34430300    4.10600500   -1.02215100
 H                  0.13466000    3.93764100   -2.30302700
 C                 -2.98254200   -1.97401700    2.63467500
 C                 -2.43553500   -2.61155200   -2.29697100
 H                 -3.00291200   -3.30046200    0.26177900
 H                 -2.22930300    0.57322900    2.02325800
 H                 -1.91873100    0.06983800   -2.23061700
 F                 -1.95720800   -1.82450400    3.50615700
 F                 -4.01722100   -1.31955400    3.21335500
 F                 -3.30095000   -3.27498900    2.63706900
 F                 -1.20365500   -2.69238500   -2.86259500
 F                 -2.81359000   -3.87244800   -2.04442800
 F                 -3.23435000   -2.15161000   -3.28280100
62
r-1-1 rotated S1
 Au                 0.93085700    1.03580600   -0.17116600
 N                  2.70326700    0.08731200    0.26866300
 C                  4.56620400   -0.64177200    1.40656500
 C                 -3.39312500   -0.24259600    0.64382200
 N                 -2.03479000    1.50750100   -0.39836500
 C                 -3.02101900    2.61668900   -0.35244000
 C                 -3.66296400   -1.59103300    0.81575800
 C                  3.87349000    0.77767600    3.70065600
 H                  3.62802900    1.31789800    4.60483000
 C                 -0.75309600    1.97098700   -0.62049600
 C                  3.41448300   -0.73218200   -0.56612700
 C                 -1.62071700   -0.82448300   -0.86758400
 C                 -2.92754600   -2.57735100    0.17565800
 C                  3.38547100    0.14501800    1.45466300
 C                 -2.35985900    0.17621800   -0.20923900
 C                  5.43333100   -2.06787700   -0.60675900
 H                  6.33129000   -2.45575300   -0.14196000
 C                  3.08967300   -1.09137900   -1.87642000
 H                  2.18609100   -0.71391100   -2.33574800
 C                  4.58524900   -1.22233600    0.07007000
 C                  3.03045000    0.86080900    2.60007600
 H                  2.12527100    1.45299500    2.61019000
 C                 -2.32988600    3.64251300   -1.26130500
 H                 -2.59443600    4.66372800   -0.97653900
 H                 -2.67226800    3.48078800   -2.28805600
 C                  5.39094000   -0.71223600    2.50544000
 H                  6.29654800   -1.30598100    2.49237900
 C                  3.95588900   -1.94588100   -2.54479900
 H                  3.73228300   -2.24810600   -3.55865800
 C                 -1.90042100   -2.15923600   -0.67005000
 C                  5.03338300    0.00629600    3.65694500
 H                  5.67234100   -0.04062900    4.52885600
 C                 -3.16208700    3.15271000    1.07182300
 H                 -3.68876400    2.45324300    1.72204200
 H                 -3.72472900    4.08847100    1.06105000
 H                 -2.17736900    3.33886600    1.50209900
 C                  5.10790100   -2.42603100   -1.92439900
 H                  5.76412200   -3.09274500   -2.46802200
 C                 -4.37664100    2.24672300   -0.93911400
 H                 -4.24824600    1.71718400   -1.88506100
 H                 -4.92743600    3.16911000   -1.13457000
 H                 -4.98565900    1.63243300   -0.27743500
 C                 -0.81951600    3.37248700   -1.17707000
 C                 -0.08771500    4.38084600   -0.28602500
 H                  0.96201800    4.09294400   -0.18998500
 H                 -0.13242400    5.38137400   -0.72664100
 H                 -0.51564600    4.42452800    0.71621400
 C                 -0.18137600    3.42985300   -2.56931400
 H                 -0.29785000    4.42599700   -3.00867900
 H                  0.88539000    3.20328600   -2.50183300
 H                 -0.64474800    2.69723700   -3.23365200
 C                 -4.80431000   -1.96482200    1.71959200
 C                 -1.11830800   -3.18439200   -1.44089800
 H                 -3.13153600   -3.62538000    0.33747300
 H                 -3.96398000    0.47693600    1.21187400
 H                 -0.84273300   -0.52399600   -1.55752500
 F                 -4.79983500   -1.24956900    2.85360600
 F                 -5.99090600   -1.73635300    1.13455100
 F                 -4.78109100   -3.25484100    2.06365700
 F                  0.12885200   -2.77080000   -1.71061300
 F                 -1.01656300   -4.34118300   -0.77768200
 F                 -1.68933300   -3.46661100   -2.62205200
62
r-1-1 coplanar T1
 Au                 1.10589400    0.87357500    0.10861600
 N                  2.77689000   -0.27179600   -0.24229400
 C                  4.92742200   -0.88746300   -0.78075700
 C                 -1.79712300   -0.51815900    0.85989600
 N                 -1.77136900    1.77699800    0.09837500
 C                 -2.56125200    3.02792200   -0.08858000
 C                 -2.31983600   -1.79207100    0.81660700
 C                  5.68740900    1.74545700   -1.28257500
 H                  6.00969300    2.75816900   -1.48346500
 C                 -0.45766900    2.03277900    0.44572300
 C                  2.86902600   -1.62973900   -0.11753600
 C                 -3.38860200    0.16932200   -0.80200900
 C                 -3.37617800   -2.12947200   -0.03257400
 C                  4.00702700    0.18355500   -0.63909600
 C                 -2.31673400    0.50607700    0.03824500
 C                  4.46327200   -3.43110300   -0.36850600
 H                  5.45045300   -3.80820600   -0.60552600
 C                  1.85328600   -2.50996800    0.26319700
 H                  0.86575600   -2.13393300    0.49531000
 C                  4.17475000   -2.08777000   -0.43559600
 C                  4.37758200    1.50622400   -0.88624900
 H                  3.65551300    2.30415800   -0.76733300
 C                 -1.59252000    4.10248900    0.45252000
 H                 -2.10910900    4.78799600    1.12999300
 H                 -1.20150700    4.68969200   -0.38258600
 C                  6.22152700   -0.63244700   -1.17359800
 H                  6.94250700   -1.43224200   -1.28936100
 C                  2.16130800   -3.86164900    0.32713800
 H                  1.39642200   -4.56773100    0.61941000
 C                 -3.89640900   -1.12150800   -0.82435900
 C                  6.59449300    0.69689700   -1.42448300
 H                  7.60882100    0.91171500   -1.73404300
 C                 -3.86402300    2.99196400    0.70077000
 H                 -4.53367200    2.20353800    0.35517000
 H                 -4.37942900    3.94666500    0.58081000
 H                 -3.66891200    2.83718500    1.76320700
 C                  3.44282300   -4.31558800    0.01756800
 H                  3.65723900   -5.37464200    0.07480900
 C                 -2.82489500    3.33017900   -1.56541800
 H                 -1.90751000    3.18036600   -2.13879800
 H                 -3.12062400    4.37763400   -1.65926500
 H                 -3.62196000    2.73025300   -2.00237500
 C                 -0.42969500    3.36968800    1.13120700
 C                 -0.71364900    3.16405200    2.62626600
 H                  0.09541800    2.59169200    3.08536400
 H                 -0.80177700    4.12578000    3.14240500
 H                 -1.64334500    2.60765300    2.76984400
 C                  0.88950600    4.10780700    0.96331900
 H                  0.84266500    5.09795800    1.42436600
 H                  1.69913000    3.54747800    1.43893900
 H                  1.12986800    4.22314200   -0.09673900
 C                 -1.77209000   -2.87043400    1.70560100
 C                 -5.05813000   -1.38987000   -1.74005100
 H                 -3.77380800   -3.13392500   -0.06201500
 H                 -1.00961900   -0.26962100    1.55979400
 H                 -3.82392200    0.90343500   -1.46216600
 F                 -0.84147800   -2.42345800    2.55452200
 F                 -2.72949300   -3.45503900    2.43372800
 F                 -1.19584000   -3.85362500    0.98467600
 F                 -4.81258500   -0.97192600   -2.98993900
 F                 -5.36615600   -2.68688900   -1.80811700
 F                 -6.16181800   -0.74195700   -1.33586800
89
e-8-1 coplanar S1
 Au                 0.50034700   -0.27315100    0.02869900
 N                  2.58398500   -0.14848200   -0.06019800
 C                  4.81681300   -0.61197200   -0.32964500
 C                 -1.33447000    2.86565800   -0.91900900
 N                 -2.13318900    0.94329400    0.37271200
 C                 -3.58031000    0.80155200    0.61597000
 C                 -0.75228800    4.13243600   -0.93986100
 H                 -0.66312100    4.65501800   -1.88613200
 C                  4.44590000   -3.30502600    0.30071100
 H                  4.33395500   -4.35297900    0.54476100
 C                 -1.48074700   -0.20603000    0.01435600
 C                  3.20916600    1.00996200   -0.40268600
 C                 -0.45496200    1.92766700   -3.05243500
 H                  0.21658400    1.26621300   -2.50081600
 H                  0.08030000    2.85353900   -3.28453800
 H                 -0.71852500    1.44024800   -3.99382600
 C                 -0.89728000    2.75019800    1.48238400
 C                 -0.27747200    4.72396100    0.22113600
 H                  0.15619700    5.71631500    0.18999700
 C                  3.52758200   -1.12876000   -0.01914300
 C                 -1.46757100    2.20568800    0.31712100
 C                 -2.43449900   -1.37629900    0.09979300
 C                  0.69885700    1.73965700    3.11264400
 H                  1.21880900    1.24744100    2.28820300
 H                  0.78949200    1.10840200    3.99934200
 H                  1.20197500    2.68849400    3.31968900
 C                  5.41087300    1.87432000   -0.91255900
 H                  6.47830900    1.75343900   -1.05196000
 C                  2.61866900    2.27242400   -0.54960100
 H                  1.55213200    2.40396400   -0.39891800
 C                 -1.71588300    2.22331200   -2.23753000
 H                 -2.18888000    1.26322000   -2.02605800
 C                 -0.77759600    1.97472100    2.77969800
 H                 -1.24145000    0.99626200    2.63119000
 C                  4.60640500    0.80747300   -0.58206100
 C                  3.33174000   -2.47592600    0.30015300
 H                  2.33912300   -2.83649500    0.54523200
 C                 -3.78673500   -0.72533700    0.49437300
 H                 -4.55718800   -0.94711200   -0.24250300
 H                 -4.14638900   -1.13322200    1.43797600
 C                  5.90731600   -1.45245500   -0.32524600
 H                  6.90034900   -1.08698400   -0.55715000
 C                 -2.66862100    3.08889000   -3.06073300
 H                 -3.55576200    3.37747400   -2.49544000
 H                 -2.98901200    2.54742200   -3.95362600
 H                 -2.17237800    4.00361600   -3.39478700
 C                  3.44952500    3.33221400   -0.88516300
 H                  3.02591600    4.32103100   -1.00515200
 C                 -0.32872500    4.02271400    1.41472300
 H                  0.09513100    4.45817300    2.31301800
 C                  5.71081800   -2.80616900   -0.00964600
 H                  6.56062100   -3.47617800   -0.00484000
 C                 -1.43795800    2.68832400    3.95937900
 H                 -2.48787400    2.91614200    3.77830900
 H                 -0.92340300    3.62975400    4.16931300
 H                 -1.36961800    2.07141500    4.85811000
 C                 -4.40854900    1.58537400   -0.40182600
 H                 -4.16986800    2.65038200   -0.34078900
 H                 -5.46995700    1.46131600   -0.17652300
 H                 -4.23419300    1.25373900   -1.42408100
 C                  4.81967300    3.13977800   -1.06547100
 H                  5.44409300    3.98447300   -1.32596300
 C                 -3.97016300    1.32783400    1.99413700
 H                 -3.42854900    0.82496700    2.79509700
 H                 -5.04025700    1.17680600    2.15216200
 H                 -3.76612000    2.39946400    2.05565300
 C                 -1.87859500   -2.29836400    1.18042400
 C                 -2.06632200   -1.99728000    2.53464000
 C                 -1.05666000   -3.38068800    0.85797600
 C                 -1.47628300   -2.74341700    3.53893100
 H                 -2.66840300   -1.14052900    2.81150900
 C                 -0.46970100   -4.13372100    1.87435700
 C                 -0.66721900   -3.82797300    3.21034300
 H                 -1.64359900   -2.47905500    4.57572400
 H                  0.15630000   -4.97698000    1.59770200
 H                 -0.20447800   -4.42609600    3.98493900
 C                 -2.46922500   -2.03572300   -1.27683800
 C                 -3.25064000   -1.49720600   -2.30603600
 C                 -1.66097300   -3.13200200   -1.57895700
 C                 -3.25604900   -2.03355200   -3.58108700
 H                 -3.86836200   -0.63032400   -2.11008300
 C                 -1.67534100   -3.67553000   -2.86449900
 C                 -2.46393400   -3.14244700   -3.86751300
 H                 -3.87911200   -1.59134400   -4.34865800
 H                 -1.04542400   -4.53553000   -3.06892400
 H                 -2.46426000   -3.58057900   -4.85747900
 C                 -0.71818500   -3.70348900   -0.56583200
 H                 -0.64152200   -4.78709900   -0.69478200
 H                  0.28311400   -3.30172100   -0.77898200
89
e-8-1 rotated S1
 Au                -0.54491000   -0.03320600   -0.09402100
 N                 -2.56270300   -0.39122000   -0.09416500
 C                 -4.72153400   -0.60900900    0.67622000
 C                  2.29226600   -2.70438900   -0.56835900
 N                  2.42032300   -0.40549600    0.26348500
 C                  3.74429100    0.23912300    0.29281600
 C                  2.23188800   -4.06950100   -0.29472600
 H                  2.28244500   -4.77549000   -1.11670500
 C                 -4.06016800    0.38448600    3.19096400
 H                 -3.83214400    0.77525200    4.17329600
 C                  1.36537800    0.41895100   -0.04807100
 C                 -3.33293600   -0.86995500   -1.12212200
 C                  0.95215900   -2.61043000   -2.65638200
 H                  0.12723100   -2.20798600   -2.06502000
 H                  0.83519200   -3.69621500   -2.71836500
 H                  0.89224400   -2.20082200   -3.66793400
 C                  1.99987400   -2.25509300    1.81248000
 C                  2.08833000   -4.53436100    1.00278700
 H                  2.05361100   -5.59896900    1.19937600
 C                 -3.39295200   -0.21814100    0.98468300
 C                  2.24449500   -1.79875800    0.50571200
 C                  1.87581300    1.83537600   -0.24884200
 C                  0.22688200   -1.49783900    3.38261800
 H                 -0.44242200   -1.41100800    2.52436700
 H                 -0.05183600   -0.74118800    4.12123800
 H                  0.08071000   -2.48358500    3.83360000
 C                 -5.61436600   -1.51809300   -1.60815600
 H                 -6.64880700   -1.65898200   -1.31984600
 C                 -2.91730400   -1.16699600   -2.42128300
 H                 -1.88490900   -1.01542800   -2.70831900
 C                  2.29299500   -2.24909500   -2.01342500
 H                  2.37105000   -1.16036200   -2.02492800
 C                  1.68503300   -1.31170400    2.95531300
 H                  1.78602600   -0.28969100    2.58456100
 C                 -4.68209300   -1.03968400   -0.71599000
 C                 -3.05189600    0.29149600    2.23972700
 H                 -2.03642100    0.61100900    2.44030400
 C                  3.40807000    1.71284300   -0.02676200
 H                  3.95291400    2.04226300   -0.91073700
 H                  3.73051800    2.35983300    0.78842800
 C                 -5.70753300   -0.51107700    1.63136400
 H                 -6.72804500   -0.80545900    1.41933800
 C                  3.42924400   -2.85491800   -2.83497700
 H                  4.40770400   -2.66068000   -2.39504200
 H                  3.42007900   -2.44638100   -3.84814000
 H                  3.30960900   -3.93809700   -2.91900400
 C                 -3.87204800   -1.64431900   -3.31013900
 H                 -3.58515400   -1.88271800   -4.32531200
 C                  1.94529200   -3.62873100    2.04164500
 H                  1.77180000   -3.98926600    3.04991300
 C                 -5.36320000   -0.01302400    2.89692800
 H                 -6.12785000    0.07037000    3.65811400
 C                  2.59243200   -1.51319300    4.16778800
 H                  3.64922900   -1.42747100    3.91488800
 H                  2.43298200   -2.50181600    4.60598500
 H                  2.36150200   -0.77366200    4.93816200
 C                  4.70061500   -0.37052300   -0.73177900
 H                  4.85906600   -1.42943700   -0.51227100
 H                  5.66608000    0.13680200   -0.67394400
 H                  4.32899700   -0.28334000   -1.75179600
 C                 -5.19616000   -1.82115700   -2.91261800
 H                 -5.91813900   -2.19795400   -3.62516900
 C                  4.41925900    0.08273200    1.65456100
 H                  3.82659200    0.50968700    2.46252800
 H                  5.39031400    0.58237500    1.63913000
 H                  4.58454800   -0.97577100    1.87109800
 C                  1.20023600    2.70395000    0.80905800
 C                  1.62694700    2.64030800    2.14135400
 C                  0.08177900    3.48490000    0.51941100
 C                  0.98016700    3.32385500    3.15394700
 H                  2.47764400    2.02037300    2.39440600
 C                 -0.56639100    4.17835700    1.54401100
 C                 -0.13379600    4.10672000    2.85551400
 H                  1.34236700    3.24965400    4.17203700
 H                 -1.43132100    4.78349200    1.29045200
 H                 -0.64726400    4.65649700    3.63421800
 C                  1.52325600    2.26320100   -1.67000000
 C                  2.26694100    1.77617000   -2.75157600
 C                  0.41415200    3.06082500   -1.94793700
 C                  1.94508400    2.08027900   -4.06112100
 H                  3.11371100    1.12870000   -2.56167700
 C                  0.09533300    3.37120100   -3.27201200
 C                  0.84647400    2.89404500   -4.32987400
 H                  2.54790200    1.68691000   -4.87039700
 H                 -0.76752700    4.00242000   -3.46061500
 H                  0.58537000    3.15061100   -5.34880600
 C                 -0.49697100    3.54413400   -0.86127400
 H                 -0.82868300    4.56354000   -1.08080000
 H                 -1.40434700    2.92454000   -0.87705000
89
e-8-1 coplanar T1
 Au                 0.52775000   -0.27908200    0.04165300
 N                  2.54986900   -0.13327200   -0.20589400
 C                  4.80482600   -0.54317700   -0.37043300
 C                 -1.48087100    2.81482600   -0.80676900
 N                 -2.11144400    0.89697400    0.56231000
 C                 -3.50614000    0.69788700    0.99051700
 C                 -0.92254700    4.08627900   -0.91592800
 H                 -0.93975200    4.58792000   -1.87766200
 C                  4.47102600   -3.25025600    0.20768200
 H                  4.37370400   -4.30293700    0.43622300
 C                 -1.41587800   -0.26334500    0.31220600
 C                  3.17324300    1.05416600   -0.48654300
 C                 -0.84669800    1.80782800   -3.00151700
 H                 -0.09759300    1.19036300   -2.50003800
 H                 -0.36589000    2.72444400   -3.35788500
 H                 -1.21763200    1.25439400   -3.86819300
 C                 -0.80606000    2.75222700    1.53814500
 C                 -0.34424800    4.70933200    0.18035200
 H                  0.06853900    5.70688100    0.08816600
 C                  3.51928600   -1.09333200   -0.12287100
 C                 -1.47899100    2.17176100    0.44678400
 C                 -2.39407000   -1.41927600    0.21310400
 C                  0.96802500    1.82842500    3.03263700
 H                  1.41511800    1.30923700    2.18305500
 H                  1.16070600    1.24033300    3.93254100
 H                  1.46668800    2.79488500    3.14759300
 C                  5.37650000    1.96312900   -0.88484600
 H                  6.44999700    1.86025000   -0.98507000
 C                  2.56567100    2.30414500   -0.63017100
 H                  1.49158400    2.41431700   -0.52263300
 C                 -2.00105300    2.13559700   -2.05354200
 H                 -2.44235100    1.18756100   -1.75177300
 C                 -0.53920200    2.01800600    2.83806700
 H                 -0.98663200    1.02458500    2.76175000
 C                  4.57507500    0.87906000   -0.60772100
 C                  3.33922800   -2.44581600    0.17409200
 H                  2.34765500   -2.83085100    0.38301800
 C                 -3.71322400   -0.81867300    0.76248300
 H                 -4.54310100   -0.99979500    0.08120800
 H                 -3.99349000   -1.29399700    1.69993600
 C                  5.91415600   -1.35645100   -0.33473500
 H                  6.90653900   -0.96464000   -0.52073900
 C                 -3.05489200    2.96459400   -2.78438100
 H                 -3.86103700    3.27990400   -2.11981400
 H                 -3.48696800    2.38039900   -3.60123600
 H                 -2.61146300    3.86259700   -3.22281000
 C                  3.39198500    3.38670000   -0.90465900
 H                  2.95608600    4.37061100   -1.01847000
 C                 -0.26975100    4.03268500    1.38633900
 H                  0.23080600    4.49497400    2.23016900
 C                  5.73478500   -2.71854300   -0.04571400
 H                  6.59870600   -3.36944700   -0.01429500
 C                 -1.09415400    2.75260500    4.05897400
 H                 -2.15862100    2.96793100    3.97551000
 H                 -0.57277000    3.70346800    4.19786600
 H                 -0.93411900    2.15763100    4.96072600
 C                 -4.47193500    1.56974100    0.19283700
 H                 -4.21639400    2.62554600    0.31846000
 H                 -5.48875300    1.42032700    0.56174400
 H                 -4.45547400    1.34347200   -0.87194200
 C                  4.77019000    3.22125200   -1.03292000
 H                  5.38952700    4.08211800   -1.24862600
 C                 -3.69499000    1.04624200    2.46507000
 H                 -3.01775200    0.46956300    3.09781700
 H                 -4.72203000    0.82653200    2.76611700
 H                 -3.51325000    2.11032800    2.62658800
 C                 -1.82729300   -2.56160100    1.05179500
 C                 -2.00474800   -2.59538000    2.43748700
 C                 -0.99533900   -3.52180500    0.47447600
 C                 -1.42152800   -3.57324900    3.22590100
 H                 -2.59101100   -1.82462000    2.92299100
 C                 -0.41063200   -4.50688900    1.27209400
 C                 -0.62051600   -4.54735900    2.63939200
 H                 -1.58611400   -3.57087100    4.29621000
 H                  0.21856400   -5.25314500    0.79629100
 H                 -0.16489100   -5.32300100    3.24201500
 C                 -2.50771000   -1.79849700   -1.26595900
 C                 -3.40366300   -1.15184500   -2.12557000
 C                 -1.65467700   -2.75423800   -1.82836000
 C                 -3.43445600   -1.40781000   -3.48745600
 H                 -4.09506000   -0.41913000   -1.73369300
 C                 -1.70189300   -3.02315900   -3.19318100
 C                 -2.57507800   -2.35231900   -4.03522300
 H                 -4.14048800   -0.87776900   -4.11570000
 H                 -1.03309000   -3.77780800   -3.59480200
 H                 -2.59619000   -2.57241300   -5.09489700
 C                 -0.64913200   -3.47186300   -0.98386600
 H                 -0.49456500   -4.48437100   -1.36754000
 H                  0.31528400   -2.95380400   -1.09205200
81
e-12-1 coplanar S1
 Au                 0.70209400    0.53262400   -0.24661900
 N                  2.49519400    1.59947400   -0.04981700
 C                  4.19329600    3.13710500   -0.20942200
 C                  0.85038700   -2.83315800    1.47259500
 N                 -0.82955200   -1.97127300   -0.08664200
 C                 -2.11094200   -2.67748100   -0.26998500
 C                  2.05728600   -3.49992500    1.69012900
 H                  2.38865000   -3.67117400    2.70879700
 C                  2.45991700    5.12011100   -1.13274400
 H                  1.81211500    5.90782800   -1.49375100
 C                 -0.88685300   -0.65552800   -0.47418100
 C                  3.64720800    0.98552700    0.32668000
 C                  0.88164000   -1.17320200    3.33125800
 H                  1.09001000   -0.36903000    2.61950500
 H                  1.83709300   -1.54609200    3.71254700
 H                  0.32103300   -0.75451300    4.17079200
 C                  1.22268300   -3.01681100   -0.93312900
 C                  2.83929500   -3.92420300    0.62960000
 H                  3.77137800   -4.44583900    0.81141000
 C                  2.80418200    2.87915500   -0.39000500
 C                  0.41875600   -2.62047500    0.15422400
 C                 -2.24325500   -0.35609000   -1.06927800
 C                  1.77940100   -1.72799600   -3.01022100
 H                  1.73876000   -0.77929600   -2.47178700
 H                  1.50103500   -1.55036300   -4.05193100
 H                  2.81115600   -2.09125200   -2.99345900
 C                  6.00672200    1.43824000    0.62316900
 H                  6.86634800    2.09678700    0.59128900
 C                  3.79919100   -0.35024900    0.72298900
 H                  2.94638500   -1.01989300    0.73972300
 C                  0.08839600   -2.29602800    2.66222800
 H                 -0.83916500   -1.86374500    2.29049700
 C                  0.84561900   -2.76128700   -2.37888900
 H                 -0.16853500   -2.35377200   -2.39651900
 C                  4.75283000    1.88105300    0.26681600
 C                  1.92985700    3.86760000   -0.85405400
 H                  0.87941500    3.64119200   -0.98635000
 C                 -2.77959300   -1.78935100   -1.32545500
 H                 -3.86241800   -1.88075200   -1.27234300
 H                 -2.46159100   -2.10549700   -2.32461900
 C                  4.69758100    4.38718700   -0.49155800
 H                  5.74962000    4.61084400   -0.36192100
 C                 -0.25107100   -3.39159800    3.66975300
 H                 -0.78174900   -4.22043400    3.19552900
 H                 -0.87834800   -2.99249000    4.46946700
 H                  0.65378600   -3.79679900    4.13000800
 C                  5.07312000   -0.77371600    1.07495700
 H                  5.22348900   -1.80035800    1.38369100
 C                  2.42546100   -3.66829900   -0.66996400
 H                  3.04555100   -3.98396500   -1.50164400
 C                  3.81918600    5.37876100   -0.95552200
 H                  4.20561200    6.36395400   -1.18161000
 C                  0.88323800   -4.04367000   -3.21380900
 H                  0.33010100   -4.86000600   -2.74687200
 H                  1.91269200   -4.38138900   -3.35513300
 H                  0.46269200   -3.85989400   -4.20457500
 C                 -2.93350000   -2.69161200    1.01876900
 H                 -2.46145000   -3.32385100    1.77381400
 H                 -3.92910200   -3.09219200    0.81357900
 H                 -3.04104400   -1.68535700    1.42662800
 C                  6.15829100    0.10223500    1.03090900
 H                  7.14056900   -0.25458700    1.31216400
 C                 -1.92543300   -4.10591700   -0.75080600
 H                 -1.40271000   -4.13913400   -1.70593000
 H                 -2.90459000   -4.57156100   -0.87803300
 H                 -1.36110500   -4.69212200   -0.02096300
 C                 -3.27385900    0.48774800   -0.26867200
 C                 -4.52174600    0.80646200   -0.84701200
 C                 -3.08493000    1.06811600    0.99606900
 C                 -5.44293200    1.67673300   -0.28561700
 C                 -3.98686500    1.94961700    1.58320300
 C                 -5.15686900    2.26826000    0.92911400
 H                 -6.37497600    1.87676500   -0.79530000
 H                 -3.76505700    2.36466900    2.55636600
 C                 -1.92724800    0.43627600   -2.35940000
 H                 -1.36194200    1.32851500   -2.08042100
 H                 -1.28458900   -0.17510400   -2.99761100
 H                 -2.80249900    0.74213200   -2.92698400
 Cl                -5.08573000    0.09157500   -2.33002000
 Cl                -1.74599500    0.70124000    2.03006200
 Cl                -6.27311300    3.37021700    1.63663900
81
e-12-1 rotated S1
 Au                 0.84565600    0.19911500   -0.36611100
 N                  2.59270300    1.28235700   -0.38911500
 C                  4.18163600    2.83481000    0.22394500
 C                  0.53771600   -2.52245100    2.23169500
 N                 -1.03658000   -1.95625000    0.45099900
 C                 -2.41308700   -2.46748200    0.40529300
 C                  1.65983300   -3.22933200    2.66192000
 H                  2.00397500   -3.10455100    3.68326700
 C                  2.55963900    3.89973200    2.21775500
 H                  1.94777100    4.33412800    2.99656500
 C                 -0.87105000   -0.78789600   -0.27869600
 C                  3.68468400    1.11762800   -1.20151500
 C                  0.79639400   -0.41505600    3.55382000
 H                  1.15351400    0.09159500    2.65285800
 H                  1.66697500   -0.78007700    4.10578600
 H                  0.27849700    0.31375600    4.18340500
 C                  0.79093600   -3.52910800    0.02455100
 C                  2.34258900   -4.07338800    1.80320000
 H                  3.21328700   -4.61673000    2.14941700
 C                  2.88370700    2.31566000    0.46618200
 C                  0.09366300   -2.68786900    0.91203100
 C                 -2.14961500   -0.49604900   -1.04079400
 C                  1.39100100   -3.04546900   -2.36466300
 H                  1.42384400   -1.97169800   -2.17213600
 H                  1.10520700   -3.20738000   -3.40727200
 H                  2.39043600   -3.46433200   -2.21437300
 C                  5.89223400    2.03997700   -1.58453500
 H                  6.68736600    2.73815300   -1.35363300
 C                  3.84228400    0.18894700   -2.23172300
 H                  3.04817200   -0.50744900   -2.46131300
 C                 -0.13990200   -1.56432000    3.18397900
 H                 -0.99365900   -1.13635400    2.66073100
 C                  0.38592400   -3.70897100   -1.42526100
 H                 -0.57302300   -3.20671800   -1.57007000
 C                  4.71076600    2.04414500   -0.87922800
 C                  2.06065900    2.84680000    1.46145700
 H                  1.06776100    2.44618300    1.61821500
 C                 -2.91671900   -1.83842200   -0.89775500
 H                 -3.99977100   -1.73404700   -0.87906600
 H                 -2.65608300   -2.48215800   -1.74426900
 C                  4.66110000    3.87828500    0.98223600
 H                  5.64938100    4.28830400    0.81422600
 C                 -0.64097300   -2.27581000    4.43855300
 H                 -1.29732600   -3.11186000    4.18614800
 H                 -1.19369400   -1.58368600    5.07772400
 H                  0.19382000   -2.67411700    5.02144300
 C                  5.03983700    0.19829000   -2.93501000
 H                  5.19264700   -0.50866800   -3.73911800
 C                  1.90904700   -4.21399100    0.49323400
 H                  2.45081500   -4.86688400   -0.18274800
 C                  3.83674700    4.40725100    1.98647200
 H                  4.19956700    5.22785500    2.59133100
 C                  0.23999500   -5.18534000   -1.79845400
 H                 -0.37864100   -5.73071700   -1.08395000
 H                  1.21676900   -5.67410200   -1.82942900
 H                 -0.20482200   -5.28308500   -2.79108400
 C                 -3.23518000   -1.96062200    1.59259600
 H                 -2.87189000   -2.39586000    2.52639400
 H                 -4.28259100   -2.24598400    1.46785900
 H                 -3.17803200   -0.87459600    1.67346000
 C                  6.04922500    1.10579700   -2.61920700
 H                  6.97268100    1.09039000   -3.18296700
 C                 -2.48604400   -3.98537900    0.38999100
 H                 -2.00652300   -4.40751400   -0.49161100
 H                 -3.53332500   -4.29350900    0.38977600
 H                 -2.00964100   -4.40252900    1.28123900
 C                 -3.04915900    0.69533100   -0.60495600
 C                 -4.20705200    1.00882500   -1.35194000
 C                 -2.81952200    1.59374900    0.45112900
 C                 -4.98512400    2.13900100   -1.15534700
 C                 -3.57791500    2.73963200    0.67082900
 C                 -4.64687700    3.02260200   -0.15016700
 H                 -5.85027800    2.31204700   -1.77975300
 H                 -3.32988600    3.38813400    1.49920000
 C                 -1.68666600   -0.19702600   -2.48568300
 H                 -1.00127700    0.65286500   -2.45802800
 H                 -1.12738800   -1.06111400   -2.85309000
 H                 -2.48862700    0.02792400   -3.18396600
 Cl                -4.84504300   -0.03366900   -2.59085600
 Cl                -1.62850300    1.35527500    1.69048000
 Cl                -5.58139900    4.44584500    0.10112900
81
e-12-1 coplanar T1
 Au                 0.72985700    0.50692800   -0.34399600
 N                  2.46355200    1.58548300   -0.22161500
 C                  4.07138300    3.22912900   -0.22180100
 C                  0.93254700   -2.68376000    1.62352800
 N                 -0.77733600   -1.98427500    0.01948700
 C                 -2.05170400   -2.70120800   -0.11006300
 C                  2.14102100   -3.33060900    1.88674600
 H                  2.48716000   -3.40505100    2.91212300
 C                  2.22672100    5.19338500   -0.93815500
 H                  1.53378700    5.97651500   -1.21457600
 C                 -0.86269100   -0.66401700   -0.40356000
 C                  3.66010400    1.00712500    0.11621100
 C                  0.98338100   -0.87024000    3.33473800
 H                  1.20071700   -0.13588300    2.55368200
 H                  1.93315500   -1.21532300    3.75418200
 H                  0.42290800   -0.37209200    4.12993800
 C                  1.26732900   -3.09679900   -0.75656600
 C                  2.90081900   -3.86768200    0.86121600
 H                  3.83028900   -4.38028200    1.07942400
 C                  2.70050000    2.91587800   -0.42410400
 C                  0.47577800   -2.59996800    0.29823900
 C                 -2.22080800   -0.42733300   -1.03364400
 C                  1.83599500   -1.97890700   -2.92231000
 H                  1.81766300   -0.99500400   -2.44932400
 H                  1.55377100   -1.86542600   -3.97189200
 H                  2.86034200   -2.36200200   -2.88770900
 C                  5.98496500    1.57139700    0.45753200
 H                  6.80345900    2.28031700    0.48142500
 C                  3.88156400   -0.33892600    0.41289000
 H                  3.06477700   -1.05156500    0.38982900
 C                  0.18208100   -2.04208000    2.76750700
 H                 -0.74653800   -1.64099500    2.36469100
 C                  0.88576600   -2.94697200   -2.21561400
 H                 -0.12056800   -2.52199800   -2.25702900
 C                  4.70516500    1.96449600    0.13705000
 C                  1.76860100    3.89185000   -0.78231700
 H                  0.73033700    3.62222900   -0.92581500
 C                 -2.73153100   -1.88251500   -1.21175900
 H                 -3.81249500   -1.99191800   -1.15645700
 H                 -2.40415800   -2.24712700   -2.19128000
 C                  4.50760400    4.52426900   -0.38104400
 H                  5.54684900    4.79062800   -0.23290100
 C                 -0.15199700   -3.04567200    3.86868200
 H                 -0.68829600   -3.91090900    3.47272300
 H                 -0.77204500   -2.57694200    4.63568500
 H                  0.75605200   -3.41184300    4.35497800
 C                  5.17910200   -0.71669800    0.73477900
 H                  5.38517800   -1.75259300    0.97076900
 C                  2.46905300   -3.73361100   -0.45044500
 H                  3.07507000   -4.13075500   -1.25750900
 C                  3.57135100    5.50590400   -0.74225400
 H                  3.90137400    6.52839700   -0.87078000
 C                  0.90188400   -4.28664000   -2.95546800
 H                  0.34164800   -5.06008400   -2.42833700
 H                  1.92667800   -4.64643500   -3.07609100
 H                  0.47875600   -4.17052200   -3.95536500
 C                 -2.86074700   -2.63418700    1.18678200
 H                 -2.37329100   -3.21431900    1.97367400
 H                 -3.85950000   -3.04740400    1.02634600
 H                 -2.96089800   -1.60343800    1.53106000
 C                  6.21247600    0.21868400    0.75715500
 H                  7.21391300   -0.10327600    1.01145100
 C                 -1.87423900   -4.15739700   -0.50204000
 H                 -1.37598600   -4.25089000   -1.46601700
 H                 -2.85398900   -4.63360100   -0.57407700
 H                 -1.28933600   -4.69405700    0.24954900
 C                 -3.28023900    0.43378100   -0.28882700
 C                 -4.54083400    0.66388800   -0.88366800
 C                 -3.11925500    1.10223600    0.93732100
 C                 -5.50665300    1.51573100   -0.37023000
 C                 -4.06751200    1.96893900    1.47376100
 C                 -5.25379800    2.18633600    0.80935400
 H                 -6.44506900    1.64186000   -0.89147800
 H                 -3.86574600    2.45314400    2.41884900
 C                 -1.92199900    0.29657400   -2.36604600
 H                 -1.38369200    1.21981200   -2.13923400
 H                 -1.25642400   -0.33360500   -2.96102800
 H                 -2.80079100    0.54392200   -2.95640900
 Cl                -5.06529000   -0.13669200   -2.33736400
 Cl                -1.76138500    0.89043000    1.99112300
 Cl                -6.42769900    3.26428800    1.45930300
88
e-18-1 coplanar S1
 Au                 0.76750000    0.36271500   -0.13727600
 N                  2.77399200    0.78162000    0.26865600
 C                  4.71842100    1.74877600    1.01537000
 C                 -0.15852100   -3.17925600    0.40701200
 N                 -1.28325100   -1.49622000   -0.98639100
 C                 -2.64936600   -1.77887400   -1.46877300
 C                  0.73714200   -4.24271900    0.49697200
 H                  0.83914800   -4.76282600    1.44309200
 C                  3.62166600    4.31185800    0.89239800
 H                  3.22170600    5.31648400    0.85982100
 C                 -1.10579300   -0.26506500   -0.42345400
 C                  3.66894600   -0.21542700    0.50686800
 C                  0.13090000   -2.16570700    2.66622900
 H                  0.64492500   -1.29860900    2.24277400
 H                  0.88107600   -2.91520200    2.93479100
 H                 -0.38056400   -1.85270500    3.57985000
 C                  0.53759500   -2.85282900   -1.91409800
 C                  1.49717200   -4.64201400   -0.59301800
 H                  2.17201300   -5.48532300   -0.50829700
 C                  3.37569300    1.95899700    0.59243500
 C                 -0.30204200   -2.52530700   -0.83337700
 C                 -2.43900400    0.47244900   -0.42732800
 C                  1.98704400   -1.31549800   -3.23539800
 H                  2.15357000   -0.68407400   -2.36015500
 H                  2.05000700   -0.68827000   -4.12738400
 H                  2.79201800   -2.05496100   -3.28258700
 C                  5.95406900   -0.55225400    1.23071800
 H                  6.91477200   -0.18366500    1.56942900
 C                  3.46158700   -1.59165600    0.34296300
 H                  2.50088000   -1.96895300    0.00976600
 C                 -0.87671200   -2.74209900    1.66935600
 H                 -1.56999900   -1.93954400    1.41583000
 C                  0.62275700   -2.00843500   -3.17039300
 H                 -0.13748900   -1.22897900   -3.10282500
 C                  4.91335000    0.30717300    0.95864500
 C                  2.81596400    3.23922100    0.53460300
 H                  1.78460400    3.36535500    0.22898200
 C                 -3.26689300   -0.37312900   -1.42989600
 H                 -4.33231200   -0.38674600   -1.23033100
 H                 -3.12502000    0.07417300   -2.41341800
 C                  5.50016400    2.82713200    1.36546300
 H                  6.52619300    2.69656800    1.68752100
 C                 -1.65855400   -3.87851000    2.32727100
 H                 -2.33145800   -4.37333500    1.62560500
 H                 -2.25212900   -3.48560800    3.15688200
 H                 -0.98282100   -4.63454900    2.73517000
 C                  4.52319200   -2.43851100    0.62812200
 H                  4.39381400   -3.50694700    0.51207900
 C                  1.41236200   -3.93150300   -1.77851200
 H                  2.05133400   -4.19834000   -2.61318300
 C                  4.94080000    4.11276200    1.29979800
 H                  5.54532600    4.96693500    1.57540200
 C                  0.41718200   -2.81971300   -4.44899800
 H                 -0.51762200   -3.37985400   -4.44269300
 H                  1.23390800   -3.53330100   -4.58557700
 H                  0.41495100   -2.15770500   -5.31743200
 C                 -3.34252000   -2.81610700   -0.58719900
 H                 -2.82039800   -3.77262300   -0.67770200
 H                 -4.37316300   -2.95267600   -0.91924800
 H                 -3.35413900   -2.53561400    0.46281700
 C                  5.74890700   -1.93148600    1.06154400
 H                  6.56065000   -2.61491100    1.27429600
 C                 -2.65424400   -2.31987800   -2.89339500
 H                 -2.18356800   -1.62198300   -3.58693400
 H                 -3.68625200   -2.48285600   -3.21211800
 H                 -2.13268900   -3.27849800   -2.93648700
 C                 -2.87480000    0.37224600    1.04628000
 C                 -3.95365300   -0.34372600    1.56837400
 C                 -2.06716500    0.94226200    2.04460900
 C                 -4.11392000   -0.65110800    2.91468500
 C                 -2.18527400    0.70764200    3.39446200
 C                 -3.20450500   -0.13879900    3.80851200
 H                 -4.95533600   -1.24742700    3.23769900
 H                 -1.50924500    1.17408600    4.09582700
 C                 -2.32235100    1.90021600   -0.94753500
 C                 -1.60770000    2.16563000   -2.12105400
 C                 -2.89630600    3.03209800   -0.37224400
 C                 -1.41218000    3.42390400   -2.65581000
 C                 -2.73768600    4.32151800   -0.85391200
 C                 -1.98189800    4.49368000   -1.99280100
 H                 -0.84124000    3.55352200   -3.56349600
 H                 -3.20351900    5.15471400   -0.34818000
 F                 -1.80946400    5.72548800   -2.48101300
 F                 -1.09243800    1.14223400   -2.81528000
 F                 -3.66706800    2.90701500    0.71379400
 F                 -4.94829800   -0.77193300    0.76969200
 F                 -1.12249000    1.81167300    1.66837800
 F                 -3.32719800   -0.41845000    5.11069100
88
e-18-1 rotated S1
 Au                 0.83678200   -0.08940600    0.11801700
 N                  2.78831000   -0.20881500    0.72801200
 C                  5.07893200    0.02337400    0.68346400
 C                 -1.61077700   -3.08743200   -0.27253700
 N                 -1.59836300   -0.88754600   -1.34885200
 C                 -2.80930900   -0.46298600   -2.06861900
 C                 -1.26434500   -4.43562100   -0.31182300
 H                 -1.61305300   -5.09235900    0.47793800
 C                  5.03297200    1.26057000   -1.80961800
 H                  5.04465400    1.74470100   -2.77672400
 C                 -1.01784200    0.07420800   -0.54750300
 C                  3.28931700   -0.73151100    1.89064400
 C                 -1.49723000   -2.62538300    2.17309900
 H                 -0.62060200   -1.98698300    2.03415300
 H                 -1.16055700   -3.64752100    2.36752600
 H                 -2.05128400   -2.27321200    3.04689700
 C                 -0.29418200   -2.73375200   -2.29835200
 C                 -0.47979000   -4.94676000   -1.33433500
 H                 -0.23259400   -6.00104800   -1.35698100
 C                  3.85722800    0.24965200   -0.00058100
 C                 -1.16982000   -2.24658600   -1.31192500
 C                 -1.95751100    1.28225400   -0.51156000
 C                  1.92568200   -1.84249200   -2.98832600
 H                  2.12961500   -1.61474700   -1.94037800
 H                  2.44243500   -1.10851800   -3.61247600
 H                  2.34675300   -2.82710100   -3.21009200
 C                  5.39651000   -1.09640100    3.02571300
 H                  6.47585900   -1.02658500    3.08084700
 C                  2.56741100   -1.30594400    2.93822000
 H                  1.48921600   -1.37291900    2.88074200
 C                 -2.38256400   -2.57414900    0.92725300
 H                 -2.62672500   -1.52580500    0.75549200
 C                  0.42157200   -1.82299000   -3.27664800
 H                  0.06462100   -0.80471100   -3.10719800
 C                  4.70405000   -0.62506500    1.93406100
 C                  3.82241200    0.87191600   -1.25039600
 H                  2.87430600    1.03488900   -1.74849200
 C                 -2.79938900    1.04843800   -1.79314100
 H                 -3.79352200    1.47949000   -1.76352200
 H                 -2.26336000    1.52455900   -2.61333000
 C                  6.26963500    0.41504200    0.11486500
 H                  7.21448000    0.25253300    0.61862300
 C                 -3.67526500   -3.34795000    1.18012700
 H                 -4.29974700   -3.40220700    0.28737200
 H                 -4.24888300   -2.86212900    1.97408500
 H                 -3.46378400   -4.36996900    1.50482100
 C                  3.28115800   -1.77601400    4.03266000
 H                  2.75356500   -2.22752800    4.86174000
 C                  0.01827000   -4.09258000   -2.30347900
 H                  0.68139100   -4.47845400   -3.07033300
 C                  6.23603900    1.03657200   -1.14210200
 H                  7.16399700    1.35006200   -1.60197200
 C                  0.19964200   -2.21570000   -4.73679300
 H                 -0.85518600   -2.24674600   -5.00673000
 H                  0.62415700   -3.20380900   -4.93318500
 H                  0.70238700   -1.50684400   -5.39871400
 C                 -4.05460200   -1.20697700   -1.58788300
 H                 -3.94754600   -2.27013100   -1.82080300
 H                 -4.93578700   -0.82807800   -2.10894900
 H                 -4.22205000   -1.11279000   -0.51834500
 C                  4.67069900   -1.67490100    4.07798300
 H                  5.20172900   -2.05006600    4.94289000
 C                 -2.69445700   -0.71503300   -3.56876500
 H                 -1.82378000   -0.20876700   -3.98782300
 H                 -3.58971700   -0.34093400   -4.07102300
 H                 -2.61792400   -1.78655900   -3.76677200
 C                 -2.74009600    1.13533600    0.80860500
 C                 -4.10704300    0.91174300    0.97122300
 C                 -2.04066300    1.10496400    2.02469400
 C                 -4.70215500    0.49751300    2.15808000
 C                 -2.56818600    0.73539700    3.24089200
 C                 -3.91026400    0.39162900    3.27570400
 H                 -5.76427600    0.30143700    2.19121500
 H                 -1.95258100    0.72570200    4.12827700
 C                 -1.20477600    2.60465400   -0.63950900
 C                 -0.21923900    2.77346100   -1.62147500
 C                 -1.41147900    3.74396300    0.13719600
 C                  0.53819300    3.91700000   -1.78860700
 C                 -0.68573800    4.91939000    0.02407300
 C                  0.29338900    4.97938100   -0.94131300
 H                  1.28262900    3.97210200   -2.56949200
 H                 -0.89772200    5.75515400    0.67476900
 F                  1.01189200    6.09771400   -1.07741500
 F                  0.01385400    1.79393600   -2.50728300
 F                 -2.37585100    3.75385800    1.06470300
 F                 -4.96750400    1.11278800   -0.04167400
 F                 -0.76469500    1.50470400    2.02834500
 F                 -4.44934100   -0.00609500    4.43320200
88
e-18-1 coplanar T1
 Au                 0.76566700    0.35585400   -0.04712400
 N                  2.69679100    0.80059500    0.44277400
 C                  4.66122600    1.85318200    1.00408900
 C                 -0.10291200   -3.19838200    0.40121400
 N                 -1.22686000   -1.52943000   -1.00769200
 C                 -2.57316100   -1.82558300   -1.52144000
 C                  0.81347300   -4.24317800    0.50775400
 H                  0.89856000   -4.77223200    1.45076500
 C                  3.45404600    4.36703900    0.97764200
 H                  3.01310000    5.35463700    0.97650500
 C                 -1.05827900   -0.26227300   -0.48625100
 C                  3.66633600   -0.15981000    0.57728700
 C                  0.09781100   -2.22242400    2.68863200
 H                  0.62928500   -1.35114800    2.29658600
 H                  0.83435800   -2.97610300    2.98208600
 H                 -0.45142600   -1.91777400    3.58307900
 C                  0.65174200   -2.83098500   -1.89272300
 C                  1.61370500   -4.61313500   -0.56359800
 H                  2.30358500   -5.44323700   -0.46863300
 C                  3.28224300    2.00811500    0.70113000
 C                 -0.22889100   -2.53414600   -0.83571100
 C                 -2.41706300    0.43312600   -0.47729700
 C                  2.10040600   -1.25749100   -3.17304600
 H                  2.23655500   -0.63181800   -2.28857400
 H                  2.16844900   -0.61973200   -4.05721200
 H                  2.92006700   -1.98115800   -3.21289700
 C                  6.01588600   -0.38950300    1.09343200
 H                  6.98236900    0.02331700    1.35519400
 C                  3.50778700   -1.53681200    0.40890900
 H                  2.54135500   -1.95510800    0.15009800
 C                 -0.86765900   -2.78726100    1.64458800
 H                 -1.55537500   -1.98473200    1.37520200
 C                  0.74793600   -1.97497400   -3.14024300
 H                 -0.02768600   -1.20993200   -3.08079300
 C                  4.91442300    0.41810400    0.92053300
 C                  2.66637200    3.26100000    0.68652800
 H                  1.61137400    3.34340600    0.45706000
 C                 -3.20846000   -0.42609500   -1.49890300
 H                 -4.27921700   -0.45110400   -1.33017900
 H                 -3.04372300    0.02138900   -2.47878800
 C                  5.42599900    2.96082700    1.28962300
 H                  6.48001100    2.87294800    1.52251800
 C                 -1.66132500   -3.94066800    2.25764200
 H                 -2.30458400   -4.43173700    1.52666200
 H                 -2.28666900   -3.56725800    3.07289600
 H                 -0.99090500   -4.69584900    2.67620000
 C                  4.63051600   -2.33525300    0.58621000
 H                  4.54250100   -3.40669600    0.46169000
 C                  1.54781400   -3.89050900   -1.74318400
 H                  2.21513300   -4.13505500   -2.56255800
 C                  4.80885100    4.22163500    1.27360300
 H                  5.39887500    5.10073500    1.49723000
 C                  0.58357200   -2.78037400   -4.42859700
 H                 -0.34134500   -3.35630700   -4.44541900
 H                  1.41525400   -3.47909800   -4.55226600
 H                  0.58799500   -2.11255000   -5.29266700
 C                 -3.28155200   -2.87604900   -0.66800900
 H                 -2.74675500   -3.82624100   -0.75350600
 H                 -4.30185900   -3.02196200   -1.02728400
 H                 -3.32209300   -2.60641800    0.38403300
 C                  5.86196200   -1.77441300    0.92187500
 H                  6.72029600   -2.42008400    1.05434200
 C                 -2.53805300   -2.35907100   -2.94997800
 H                 -2.05399600   -1.65283800   -3.62583000
 H                 -3.55897500   -2.53004900   -3.29923900
 H                 -2.00563900   -3.31233200   -2.98422100
 C                 -2.88965200    0.31573200    0.98447100
 C                 -3.96721100   -0.41916600    1.47689600
 C                 -2.11997800    0.89656800    2.00460600
 C                 -4.15734800   -0.73461600    2.81806600
 C                 -2.26569400    0.65330200    3.35076900
 C                 -3.27971200   -0.21039300    3.73600500
 H                 -4.99538700   -1.34799500    3.11667500
 H                 -1.61555600    1.12841300    4.07053600
 C                 -2.34120000    1.86966500   -0.98642900
 C                 -1.62238800    2.17333800   -2.14936000
 C                 -2.96407800    2.97608600   -0.41163200
 C                 -1.46636300    3.44503400   -2.66767400
 C                 -2.84722600    4.27568400   -0.87806500
 C                 -2.08278300    4.48707400   -2.00406800
 H                 -0.89034800    3.60310700   -3.56764500
 H                 -3.35148900    5.08513900   -0.37069100
 F                 -1.94857200    5.72952000   -2.47843500
 F                 -1.06481600    1.18340000   -2.85687100
 F                 -3.74715400    2.81633500    0.66179800
 F                 -4.93382400   -0.86345300    0.65472900
 F                 -1.18813300    1.79267700    1.65789900
 F                 -3.43083500   -0.49679400    5.03360500
21
Carbazole fragment
 N                  0.00007100   -1.69133800    0.00010400
 C                  0.73099100    0.51379400    0.00000100
 C                  3.40236100   -0.25621400   -0.00003900
 H                  4.45025500   -0.52704200   -0.00005800
 C                 -1.09108900   -0.86151200    0.00002800
 C                  1.09102500   -0.86158500    0.00001900
 C                 -1.70139500    1.49024700    0.00003500
 H                 -1.44319800    2.54266800    0.00003700
 C                 -2.43095000   -1.25107400   -0.00006500
 H                 -2.68877800   -2.30208600   -0.00016600
 C                 -0.73098300    0.51379600    0.00010000
 C                  2.43101700   -1.25105700   -0.00002200
 H                  2.68902000   -2.30202900   -0.00002000
 C                  1.70134800    1.49027700   -0.00001800
 H                  1.44304000    2.54266600    0.00000700
 C                 -3.40239000   -0.25624700   -0.00005400
 H                 -4.45028600   -0.52704100   -0.00010300
 C                  3.04536400    1.09164500   -0.00003300
 H                  3.82274400    1.84522100   -0.00003700
 C                 -3.04539000    1.09156900   -0.00001000
 H                 -3.82275200    1.84517100   -0.00003200
22
Au-Carbazole fragment
 Au                -1.88698800   -0.00020200   -0.04737400
 N                  0.03709700   -0.00010400    0.28714700
 C                  2.18124000   -0.72254700   -0.00757100
 C                  1.48617600   -3.40990600    0.04991600
 H                  1.23294700   -4.46266500    0.06387900
 C                  0.83590400    1.12328000    0.13995900
 C                  0.83619200   -1.12315900    0.13998600
 C                  3.17968100    1.68969500   -0.11037900
 H                  4.21790700    1.39544600   -0.21245800
 C                  0.47739600    2.46763200    0.16437800
 H                 -0.56261700    2.75884300    0.26442500
 C                  2.18103100    0.72302100   -0.00755500
 C                  0.47822300   -2.46769800    0.16439300
 H                 -0.56166600   -2.75934800    0.26445900
 C                  3.18023200   -1.68883500   -0.11041400
 H                  4.21831900   -1.39409900   -0.21250000
 C                  1.48501500    3.41022500    0.04992300
 H                  1.23147800    4.46290600    0.06388200
 C                  2.82768400   -3.02775800   -0.08333000
 H                  3.59239200   -3.78914900   -0.16761200
 C                  2.82664000    3.02848500   -0.08330300
 H                  3.59110400    3.79013100   -0.16756000
34
a-1-1 carbene fragment
 C                 -1.82793800   -0.97569600    0.83999900
 N                  0.19554900   -0.09318900   -0.18370900
 C                  0.82417200    1.14596200    0.38709600
 C                 -3.20774000   -1.12295900    0.86910600
 H                 -3.67002000   -1.70999900    1.65245900
 C                  0.97268900   -1.08457200   -0.54764900
 C                 -2.01131500    0.36288900   -1.15424200
 C                 -3.99198200   -0.52544300   -0.11070900
 C                 -1.23301900   -0.22963700   -0.16896300
 C                  2.29488700    0.88700100    0.05154200
 H                  2.94890100    1.17434800    0.87850500
 H                  2.58008700    1.48429000   -0.81939700
 C                 -3.39196900    0.21261700   -1.12341900
 H                 -3.99848600    0.66556100   -1.89738900
 C                  0.54573600    1.20532600    1.88523000
 H                 -0.52740300    1.27897100    2.07577400
 H                  1.02863100    2.08523500    2.31446000
 H                  0.92781700    0.31801400    2.39241200
 C                  0.29348800    2.40646300   -0.27928900
 H                  0.41607000    2.35361500   -1.36294200
 H                  0.85742100    3.26664300    0.08724000
 H                 -0.76107400    2.56920100   -0.04822800
 C                  2.39129700   -0.61366400   -0.28996800
 C                  2.91427700   -1.44387100    0.88566600
 H                  2.89324800   -2.50525700    0.63482600
 H                  3.94363500   -1.15477100    1.11506500
 H                  2.30973500   -1.29888400    1.78378300
 C                  3.26452900   -0.87231900   -1.51190600
 H                  4.28925800   -0.53829600   -1.32482900
 H                  3.27913100   -1.93781700   -1.74570600
 H                  2.88367800   -0.33802100   -2.38509500
 H                 -1.19347100   -1.44794900    1.58070500
 H                 -5.06794400   -0.64303300   -0.09061700
 H                 -1.53074500    0.91788500   -1.95002100
35
a-1-1 carbene-Au fragment
 Au                 1.22505900   -1.34095900    0.00114400
 C                 -2.02660300   -0.67642300    1.04566300
 N                 -0.67046800    0.96276200   -0.13767700
 C                 -0.86150200    2.40345600    0.21087600
 C                 -3.09452600   -1.56218800    1.07890300
 H                 -3.28731100   -2.13735300    1.97506900
 C                  0.57046700    0.57187700   -0.32913600
 C                 -2.57094600   -0.11105400   -1.23743100
 C                 -3.90161800   -1.72135300   -0.04138900
 C                 -1.77568300    0.04926900   -0.11207600
 C                  0.51432800    2.96837500   -0.16062400
 H                  0.83471400    3.73572300    0.54691200
 H                  0.45755900    3.42842000   -1.15115300
 C                 -3.63754100   -0.99994300   -1.19910600
 H                 -4.25633400   -1.13475600   -2.07683200
 C                 -1.18791600    2.52498200    1.69518000
 H                 -2.13642100    2.03275500    1.92027400
 H                 -1.27840400    3.57867200    1.96498600
 H                 -0.40801300    2.07368900    2.30984100
 C                 -1.97951800    3.02053500   -0.61404800
 H                 -1.79636900    2.88290400   -1.68138200
 H                 -2.02282600    4.09157300   -0.40803800
 H                 -2.94792000    2.58442300   -0.36185300
 C                  1.48247200    1.77046600   -0.20176900
 C                  2.30578900    1.64189000    1.08412100
 H                  2.95666300    0.76801200    1.02903700
 H                  2.91934000    2.53819600    1.20812100
 H                  1.67305600    1.52750500    1.96589000
 C                  2.43323200    1.82652400   -1.39353200
 H                  3.08497500    2.70036900   -1.31324100
 H                  3.05097700    0.92646700   -1.41685800
 H                  1.88232300    1.88952100   -2.33409400
 H                 -1.36462600   -0.55748600    1.89529400
 H                 -4.73056700   -2.41700500   -0.01576800
 H                 -2.33980000    0.44629800   -2.13662200
38
b-1-1 carbene fragment
 C                  1.69341000    1.27282500   -0.19216900
 N                 -0.33752900   -0.09327200   -0.12001900
 C                 -0.98295300   -0.29508200    1.22867400
 C                  3.08741900    1.36010600   -0.19790100
 H                  3.55894600    2.33469300   -0.15382300
 C                 -1.11186200    0.08962300   -1.16163700
 C                  1.85992500   -1.14298300   -0.41709200
 C                  1.09252100    0.00896000   -0.21648800
 C                 -2.44207300   -0.48324300    0.80671100
 H                 -3.12422200    0.03411000    1.48563400
 H                 -2.69448800   -1.54748000    0.83012100
 C                  3.25260700   -1.03851600   -0.42324200
 H                  3.85224400   -1.93154100   -0.55358800
 C                 -0.75849200    0.93290300    2.10392900
 H                  0.30862400    1.10537800    2.25654800
 H                 -1.22497100    0.76411200    3.07659400
 H                 -1.18646100    1.83203000    1.66243100
 C                 -0.41679900   -1.51363800    1.94136300
 H                 -0.56851100   -2.42290600    1.36132600
 H                 -0.92208900   -1.62258600    2.90328400
 H                  0.65323800   -1.39724300    2.12681200
 C                 -2.53523300    0.04044000   -0.63986700
 C                 -3.05777500    1.47912600   -0.70426200
 H                 -3.02869500    1.84556000   -1.73183100
 H                 -4.09019200    1.51653600   -0.34641400
 H                 -2.46063600    2.15351900   -0.08506200
 C                 -3.40172700   -0.84676700   -1.52445300
 H                 -4.42835300   -0.87392400   -1.14819200
 H                 -3.41214900   -0.46711400   -2.54735800
 H                 -3.01996100   -1.87039600   -1.54525600
 N                  0.90038500    2.41276900   -0.15198100
 H                  0.01921900    2.31498200   -0.64601600
 H                  1.38695600    3.26377600   -0.39645000
 N                  1.23127600   -2.36812600   -0.59755000
 H                  1.81369800   -3.08081400   -1.01345000
 H                  0.31736500   -2.30699500   -1.03038300
 C                  3.84817000    0.20562500   -0.29062300
 H                  4.92869500    0.28043700   -0.29572400
39
b-1-1 carbene-Au fragment
 Au                 1.37288300   -1.32628000   -0.06385300
 C                 -1.97797600   -0.65379800    1.15673800
 N                 -0.54640400    0.94604600   -0.03181400
 C                 -0.76708300    2.40011900    0.27086600
 C                 -3.11726400   -1.46142600    1.16453800
 H                 -3.39907200   -1.97003700    2.07857900
 C                  0.69256900    0.59423400   -0.28896900
 C                 -2.31662200   -0.24377600   -1.22314300
 C                 -1.63990500    0.01633200   -0.02573700
 C                  0.59596200    2.98113000   -0.12574700
 H                  0.90930700    3.76963200    0.56140500
 H                  0.52365800    3.41698100   -1.12636600
 C                 -3.45053000   -1.05578600   -1.19380100
 H                 -3.99331900   -1.24553100   -2.11195800
 C                 -1.10507100    2.59523700    1.74381300
 H                 -2.02451800    2.06660400    1.99881300
 H                 -1.25159700    3.66100600    1.93021900
 H                 -0.31372900    2.23117200    2.39770900
 C                 -1.90195100    2.95852300   -0.57397200
 H                 -1.70885300    2.82655600   -1.63760900
 H                 -2.00295600    4.02423800   -0.36002100
 H                 -2.84662700    2.46790100   -0.33013100
 C                  1.58672500    1.80310000   -0.15046100
 C                  2.37057100    1.67135100    1.16055800
 H                  3.03728100    0.80854300    1.11708900
 H                  2.96485900    2.57498600    1.31848100
 H                  1.70716300    1.53848900    2.01793500
 C                  2.56817900    1.88000400   -1.31387200
 H                  3.20561100    2.76189400   -1.21235400
 H                  3.19926200    0.98879700   -1.32848000
 H                  2.04147100    1.94417900   -2.26876500
 N                 -1.19581500   -0.49882800    2.29430100
 H                 -0.19967900   -0.42737000    2.09885500
 H                 -1.37621500   -1.19501100    3.00532200
 N                 -1.86202600    0.31906300   -2.40987300
 H                 -2.24240600   -0.10842200   -3.24268600
 H                 -0.85574500    0.42987800   -2.46162500
 C                 -3.84966800   -1.63321500    0.00154300
 H                 -4.72951200   -2.26447800    0.01752400
36
c-1-1 carbene fragment
 C                  1.67645700    1.25440700   -0.11703400
 N                 -0.35347200   -0.10592500   -0.11366100
 C                 -1.03136400   -0.33436300    1.20688900
 C                  3.05884700    1.38036900   -0.21978500
 H                  3.51324700    2.36293900   -0.15913000
 C                 -1.08692700    0.09321600   -1.18265300
 C                  1.86434700   -1.12386600   -0.40453600
 C                  1.06894600   -0.00005800   -0.18390500
 C                 -2.48363800   -0.47757400    0.74406300
 H                 -3.16915200    0.04986400    1.41214300
 H                 -2.76484600   -1.53452800    0.74491600
 C                  3.24763900   -1.00386400   -0.50783700
 H                  3.85019900   -1.88982500   -0.67440900
 C                 -0.80689800    0.85579000    2.13242400
 H                  0.25845600    0.98980200    2.33512200
 H                 -1.31346900    0.67071900    3.08186000
 H                 -1.19144500    1.77812600    1.69964300
 C                 -0.50617900   -1.59528800    1.87687600
 H                 -0.64132400   -2.46321000    1.23297500
 H                 -1.05014600   -1.75553500    2.81014900
 H                  0.55635100   -1.49916400    2.11555700
 C                 -2.52308900    0.06893700   -0.69720700
 C                 -2.98709300    1.52876100   -0.74737700
 H                 -2.95348500    1.89802500   -1.77340900
 H                 -4.01317800    1.60509500   -0.37661000
 H                 -2.34589400    2.17222800   -0.14070700
 C                 -3.39968800   -0.77309600   -1.61409900
 H                 -4.43663100   -0.76386500   -1.26529800
 H                 -3.36810000   -0.37856700   -2.63092000
 H                 -3.05554100   -1.80922600   -1.64023500
 C                  3.83421300    0.24772200   -0.41055400
 H                  4.90928000    0.34263600   -0.49301800
 O                  1.23906300   -2.31806000   -0.53329800
 H                  1.88440900   -3.00356900   -0.74342300
 O                  0.86859600    2.33084500    0.03537400
 H                  1.39087100    3.14069000   -0.00778600
37
c-1-1 carbene-Au fragment
 Au                 1.23511000   -1.40327100   -0.11269700
 C                 -1.84819800   -0.52746600    1.19729400
 N                 -0.49021300    1.04646000   -0.07123300
 C                 -0.61491400    2.51372600    0.19474700
 C                 -2.86811800   -1.46922600    1.26938900
 H                 -3.04490000   -1.99578600    2.19932300
 C                  0.72065700    0.58490200   -0.25538600
 C                 -2.37345300   -0.12608100   -1.12092500
 C                 -1.60900000    0.16275100    0.00783400
 C                  0.80951300    2.98066300   -0.13184500
 H                  1.15109800    3.73906500    0.57554100
 H                  0.82561400    3.42186000   -1.13200400
 C                 -3.39913000   -1.06273600   -1.04955000
 H                 -3.98978900   -1.27771200   -1.93272000
 C                 -1.01349400    2.74942600    1.64637600
 H                 -1.97955200    2.28571800    1.85801100
 H                 -1.10384600    3.82346200    1.81886800
 H                 -0.27994900    2.33874800    2.33784700
 C                 -1.65533500    3.13395100   -0.72404100
 H                 -1.40424000    2.96357100   -1.76984200
 H                 -1.69623100    4.20854900   -0.53650200
 H                 -2.64598200    2.71564500   -0.52947500
 C                  1.69798100    1.72239200   -0.11021000
 C                  2.40313300    1.52592700    1.23791100
 H                  3.00221000    0.61391900    1.21649200
 H                  3.05629600    2.38054500    1.43208000
 H                  1.68688800    1.43222400    2.05660900
 C                  2.73146200    1.70418000   -1.22911100
 H                  3.43794900    2.52824500   -1.10089300
 H                  3.28180600    0.76118400   -1.20986400
 H                  2.25510900    1.80389400   -2.20626900
 C                 -3.63493700   -1.72714500    0.14398700
 H                 -4.42620400   -2.46375900    0.19542400
 O                 -2.05194000    0.50886600   -2.27256700
 H                 -2.56410200    0.14302600   -3.00386100
 O                 -1.04389900   -0.24477900    2.24958000
 H                 -1.01464400   -0.99347200    2.85799500
42
d-1-1 carbene fragment
 C                  1.39547000    1.34023700   -0.15220200
 N                 -0.53141100   -0.15720000   -0.06972400
 C                 -1.22439200   -0.31796400    1.25339100
 C                  2.77258700    1.54962400   -0.22796300
 H                  3.18174900    2.54923600   -0.24324400
 C                 -1.25149200   -0.10003100   -1.16375100
 C                  1.74942700   -1.04975600   -0.23011800
 C                  3.61766900    0.45260500   -0.29559200
 C                  0.88256500    0.04015900   -0.12307500
 C                 -2.65251200   -0.59994800    0.77886700
 H                 -3.38809100   -0.06795600    1.38757600
 H                 -2.86117200   -1.67023500    0.86436000
 C                  3.12750300   -0.84418700   -0.30513300
 H                  3.80928800   -1.67861000   -0.38057800
 C                 -1.10452700    0.95836500    2.07885400
 H                 -0.05588000    1.18328900    2.28808200
 H                 -1.61935500    0.81675800    3.03139400
 H                 -1.54270100    1.81180600    1.56360800
 C                 -0.63490100   -1.47675700    2.04396300
 H                 -0.70444800   -2.40663500    1.48142500
 H                 -1.18651300   -1.58512200    2.98030200
 H                  0.41464200   -1.29142200    2.28735500
 C                 -2.69439600   -0.18029700   -0.70383300
 C                 -3.25311000    1.23487600   -0.88640800
 H                 -3.21795600    1.51912000   -1.93917000
 H                 -4.29096200    1.27244700   -0.54342000
 H                 -2.67076000    1.96795300   -0.32345200
 C                 -3.49185700   -1.15399100   -1.56059800
 H                 -4.53491900   -1.18680600   -1.23192000
 H                 -3.46306100   -0.84520300   -2.60675600
 H                 -3.07868600   -2.16267700   -1.49225800
 H                  4.68691700    0.61290200   -0.35368900
 O                  0.48815600    2.33910000   -0.11916100
 O                  1.17257300   -2.26901700   -0.27615300
 C                  0.95190500    3.66376500   -0.22245400
 H                  1.50124800    3.81748300   -1.15525900
 H                  0.07153800    4.30100200   -0.21530100
 H                  1.59624000    3.92783500    0.62143600
 C                  2.00420000   -3.39269900   -0.43825500
 H                  1.34955800   -4.25926600   -0.47677900
 H                  2.57522100   -3.33010500   -1.36869700
 H                  2.69732300   -3.50004600    0.40140400
43
d-1-1 carbene-Au fragment
 Au                 1.36171100   -1.20958100   -0.61054700
 C                 -1.40331300   -0.83963700    1.35943100
 N                 -0.42079800    1.05942600    0.20955900
 C                 -0.54662400    2.43436900    0.78633600
 C                 -2.33854100   -1.86956500    1.42809400
 H                 -2.29435500   -2.59654200    2.22634600
 C                  0.75363800    0.72923100   -0.26158900
 C                 -2.43371200   -0.03223800   -0.68028700
 C                 -3.31789800   -1.95361200    0.45169300
 C                 -1.46413500    0.08918600    0.31724100
 C                  0.77768900    3.05591700    0.32435000
 H                  1.21174800    3.68952400    1.10054800
 H                  0.59822800    3.67829600   -0.55644400
 C                 -3.38073600   -1.05179100   -0.60151000
 H                 -4.14248200   -1.15925000   -1.35968500
 C                 -0.68379300    2.35574100    2.30215300
 H                 -1.57290000    1.78342600    2.57579000
 H                 -0.78975000    3.36662700    2.70027300
 H                  0.18100400    1.88147200    2.76209500
 C                 -1.75709700    3.14961900    0.20798900
 H                 -1.69411900    3.20861300   -0.87745900
 H                 -1.79888200    4.15993500    0.61943500
 H                 -2.68066800    2.63174600    0.47779900
 C                  1.70068300    1.88287500   -0.05517000
[truncated: 408,009 more chars]
