# Supplementary material for: Tailoring Carbene-Metal-Amides for Thermally Activated Delayed Fluorescence: A Computationally Guided Study on the Effect of Cyclic (Alkyl)(amino)carbenes
Source: Preprints.org preprint supplement (doi:10.20944/preprints202305.0227.v1), 2023-05-04
Supplement: Supplementary file 2 [file supplementary › EtCAACAuCz.cif]

data_EtCAACAuCz
_audit_creation_date               2023-04-28
_audit_creation_method
;
Olex2 1.5
(compiled 2023.03.06 svn.rbb2c1857 for OlexSys, GUI svn.r6748)
;
_shelx_SHELXL_version_number       '2018/3'
_audit_contact_author_address      ?
_audit_contact_author_email        ?
_audit_contact_author_name         ''
_audit_contact_author_phone        ?
_publ_contact_author_id_orcid      ?
_publ_section_references
;
Dolomanov, O.V., Bourhis, L.J., Gildea, R.J, Howard, J.A.K. & Puschmann, H.
 (2009), J. Appl. Cryst. 42, 339-341.

Sheldrick, G.M. (2015). Acta Cryst. A71, 3-8.

Sheldrick, G.M. (2015). Acta Cryst. C71, 3-8.
;
_chemical_name_common              ?
_chemical_name_systematic          ?
_chemical_formula_moiety           'C34 H43 Au N2'
_chemical_formula_sum              'C34 H43 Au N2'
_chemical_formula_weight           676.67
_chemical_melting_point            ?
_chemical_oxdiff_formula           C20H20N2Au1
loop_
  _atom_type_symbol
  _atom_type_description
  _atom_type_scat_dispersion_real
  _atom_type_scat_dispersion_imag
  _atom_type_scat_source
 'C' 'C' 0.0181 0.0091 'International Tables Vol C Tables 4.2.6.8 and 6.1.1.4'
 'H' 'H' 0.0000 0.0000 'International Tables Vol C Tables 4.2.6.8 and 6.1.1.4'
 'Au' 'Au' -4.4197 7.2980
 'International Tables Vol C Tables 4.2.6.8 and 6.1.1.4'
 'N' 'N' 0.0311 0.0180 'International Tables Vol C Tables 4.2.6.8 and 6.1.1.4'

_shelx_space_group_comment
;
The symmetry employed for this shelxl refinement is uniquely defined
by the following loop, which should always be used as a source of
symmetry information in preference to the above space-group names.
They are only intended as comments.
;
_space_group_crystal_system        'monoclinic'
_space_group_IT_number             14
_space_group_name_H-M_alt          'P 1 21/c 1'
_space_group_name_Hall             '-P 2ybc'
loop_
  _space_group_symop_operation_xyz
 'x, y, z'
 '-x, y+1/2, -z+1/2'
 '-x, -y, -z'
 'x, -y-1/2, z-1/2'

_cell_length_a                     9.71163(5)
_cell_length_b                     18.40218(10)
_cell_length_c                     17.11055(10)
_cell_angle_alpha                  90
_cell_angle_beta                   95.3962(5)
_cell_angle_gamma                  90
_cell_volume                       3044.36(3)
_cell_formula_units_Z              4
_cell_measurement_reflns_used      16374
_cell_measurement_temperature      100.00(10)
_cell_measurement_theta_max        75.4500
_cell_measurement_theta_min        2.4070
_shelx_estimated_absorpt_T_max     0.430
_shelx_estimated_absorpt_T_min     0.197
_exptl_absorpt_coefficient_mu      9.241
_exptl_absorpt_correction_T_max    1.00000
_exptl_absorpt_correction_T_min    0.35110
_exptl_absorpt_correction_type     multi-scan
_exptl_absorpt_process_details
;
CrysAlisPro 1.171.43.67a (Rigaku Oxford Diffraction, 2023)
Empirical absorption correction using spherical harmonics,
implemented in SCALE3 ABSPACK scaling algorithm.
;
_exptl_absorpt_special_details     ?
_exptl_crystal_colour              colourless
_exptl_crystal_colour_primary      colourless
_exptl_crystal_density_diffrn      1.476
_exptl_crystal_density_meas        ?
_exptl_crystal_density_method      ?
_exptl_crystal_description         block
_exptl_crystal_F_000               1360
_exptl_crystal_size_max            0.26
_exptl_crystal_size_mid            0.25
_exptl_crystal_size_min            0.11
_exptl_transmission_factor_max     ?
_exptl_transmission_factor_min     ?
_diffrn_reflns_av_R_equivalents    0.0181
_diffrn_reflns_av_unetI/netI       0.0150
_diffrn_reflns_Laue_measured_fraction_full  0.987
_diffrn_reflns_Laue_measured_fraction_max  0.961
_diffrn_reflns_limit_h_max         12
_diffrn_reflns_limit_h_min         -12
_diffrn_reflns_limit_k_max         15
_diffrn_reflns_limit_k_min         -21
_diffrn_reflns_limit_l_max         18
_diffrn_reflns_limit_l_min         -21
_diffrn_reflns_number              20350
_diffrn_reflns_point_group_measured_fraction_full  0.987
_diffrn_reflns_point_group_measured_fraction_max  0.961
_diffrn_reflns_theta_full          67.684
_diffrn_reflns_theta_max           75.825
_diffrn_reflns_theta_min           3.536
_diffrn_ambient_environment        N~2~
_diffrn_ambient_temperature        100.00(10)
_diffrn_detector                   'Hybrid Pixel Array Detector'
_diffrn_detector_area_resol_mean   10.0000
_diffrn_measured_fraction_theta_full  0.987
_diffrn_measured_fraction_theta_max  0.961
_diffrn_measurement_details
;
List of Runs (angles in degrees, time in seconds):

  # Type    Start    End  Width  t~exp~   \w     \q     \k     \f   Frames
--------------------------------------------------------------------------
  1  \w     -1.00  43.00   0.50    0.50    --  -44.40   9.00 103.00   88
  2  \w    -71.00 -46.00   0.50    0.50    --  -46.40  -9.00 -71.00   50
  3  \w   -132.00-107.00   0.50    0.50    -- -107.20  -9.00 -71.00   50
  4  \w   -115.00 -18.00   0.50    0.50    -- -107.20   9.00 103.00  194
  5  \w   -161.00-135.00   0.50    0.50    -- -107.20   9.00 103.00   52
  6  \w   -191.00-165.00   0.50    0.50    -- -107.20  -9.00 -71.00   52
  7  \w      5.00  41.00   0.50    0.50    --    5.00   9.00 103.00   72
  8  \w     -4.00  22.00   0.50    0.50    --    5.00  57.00-180.00   52
  9  \w    -69.00 -44.00   0.50    0.50    --  -44.40  -9.00 -71.00   50
 10  \w    -78.00  45.00   0.50    0.50    --  -44.40  76.00-150.00  246
 11  \w    -79.00  42.00   0.50    0.50    --  -46.40  57.00-180.00  242
 12  \w   -139.00 -18.00   0.50    0.50    -- -107.20  57.00  90.00  242
 13  \w    -83.00 -19.00   0.50    0.50    -- -107.20  76.00-120.00  128
 14  \w    -94.00 -29.00   0.50    0.50    -- -107.20  76.00-180.00  130
 15  \w   -148.00 -90.00   0.50    0.50    -- -107.20  76.00-120.00  116
 16  \w    -98.00 -68.00   0.50    0.50    -- -107.20  76.00 -90.00   60
 17  \w   -175.00 -92.00   0.50    0.50    -- -107.20 -57.00 -60.00  166
 18  \w   -132.00 -22.00   0.50    0.50    -- -107.20  76.00 -60.00  220
 19  \w   -144.00-118.00   0.50    0.50    -- -107.20  76.00 -90.00   52
;
_diffrn_measurement_device         'four-circle diffractometer'
_diffrn_measurement_device_type    'XtaLAB AFC11 (RINC): Kappa single'
_diffrn_measurement_method         '\w scans'
_diffrn_orient_matrix_type        
 'CrysAlisPro convention (1999,Acta A55,543-557)'
_diffrn_orient_matrix_UB_11        -0.0881568000
_diffrn_orient_matrix_UB_12        0.0098279000
_diffrn_orient_matrix_UB_13        -0.0788726000
_diffrn_orient_matrix_UB_21        0.1325547000
_diffrn_orient_matrix_UB_22        0.0030282000
_diffrn_orient_matrix_UB_23        -0.0427860000
_diffrn_orient_matrix_UB_31        -0.0056698000
_diffrn_orient_matrix_UB_32        -0.0831383000
_diffrn_orient_matrix_UB_33        -0.0109493000
_diffrn_radiation_monochromator    mirror
_diffrn_radiation_probe            x-ray
_diffrn_radiation_type             'Cu K\a'
_diffrn_radiation_wavelength       1.54184
_diffrn_source                     'Rotating-anode X-ray tube (dual wavelength)'
_diffrn_source_type                'Rigaku (Cu) X-ray DW Source'
_reflns_Friedel_coverage           0.000
_reflns_Friedel_fraction_full      .
_reflns_Friedel_fraction_max       .
_reflns_number_gt                  6060
_reflns_number_total               6090
_reflns_special_details
;
 Reflections were merged by SHELXL according to the crystal
 class for the calculation of statistics and refinement.
 
 _reflns_Friedel_fraction is defined as the number of unique
 Friedel pairs measured divided by the number that would be
 possible theoretically, ignoring centric projections and
 systematic absences.
;
_reflns_threshold_expression       'I > 2\s(I)'
_computing_cell_refinement         'CrysAlisPro 1.171.43.67a (Rigaku OD, 2023)'
_computing_data_collection         'CrysAlisPro 1.171.43.67a (Rigaku OD, 2023)'
_computing_data_reduction          'CrysAlisPro 1.171.43.67a (Rigaku OD, 2023)'
_computing_molecular_graphics      'Olex2 1.5 (Dolomanov et al., 2009)'
_computing_publication_material    'Olex2 1.5 (Dolomanov et al., 2009)'
_computing_structure_refinement    'SHELXL 2018/3 (Sheldrick, 2015)'
_computing_structure_solution      'SHELXT 2018/2 (Sheldrick, 2018)'
_refine_diff_density_max           0.845
_refine_diff_density_min           -0.974
_refine_diff_density_rms           0.083
_refine_ls_extinction_coef         0.00063(4)
_refine_ls_extinction_expression  
 'Fc^*^=kFc[1+0.001xFc^2^\l^3^/sin(2\q)]^-1/4^'
_refine_ls_extinction_method       'SHELXL-2018/3 (Sheldrick 2018)'
_refine_ls_goodness_of_fit_ref     1.115
_refine_ls_hydrogen_treatment      constr
_refine_ls_matrix_type             full
_refine_ls_number_parameters       343
_refine_ls_number_reflns           6090
_refine_ls_number_restraints       0
_refine_ls_R_factor_all            0.0208
_refine_ls_R_factor_gt             0.0207
_refine_ls_restrained_S_all        1.115
_refine_ls_shift/su_max            0.002
_refine_ls_shift/su_mean           0.000
_refine_ls_structure_factor_coef   Fsqd
_refine_ls_weighting_details      
 'w=1/[\s^2^(Fo^2^)+(0.0328P)^2^+2.8967P] where P=(Fo^2^+2Fc^2^)/3'
_refine_ls_weighting_scheme        calc
_refine_ls_wR_factor_gt            0.0562
_refine_ls_wR_factor_ref           0.0564
_refine_special_details            ?
_olex2_refinement_description
;
1. Fixed Uiso
 At 1.2 times of:
  All C(H) groups, All C(H,H) groups
 At 1.5 times of:
  All C(H,H,H) groups
2.a Ternary CH refined with riding coordinates:
 C14(H14), C11(H11)
2.b Secondary CH2 refined with riding coordinates:
 C17(H17A,H17B), C3(H3A,H3B), C19(H19A,H19B)
2.c Aromatic/amide H refined with riding coordinates:
 C24(H24), C33(H33), C32(H32), C7(H7), C30(H30), C31(H31), C25(H25), C9(H9),
 C8(H8), C27(H27), C26(H26)
2.d Idealised Me refined as rotating group:
 C12(H12A,H12B,H12C), C15(H15A,H15B,H15C), C13(H13A,H13B,H13C), C16(H16A,H16B,
 H16C), C21(H21A,H21B,H21C), C20(H20A,H20B,H20C), C22(H22A,H22B,H22C), C18(H18A,
 H18B,H18C)
;
_atom_sites_solution_hydrogens     geom
_atom_sites_solution_primary       dual
_atom_sites_solution_secondary     ?
loop_
  _atom_site_label
  _atom_site_type_symbol
  _atom_site_fract_x
  _atom_site_fract_y
  _atom_site_fract_z
  _atom_site_U_iso_or_equiv
  _atom_site_adp_type
  _atom_site_occupancy
  _atom_site_site_symmetry_order
  _atom_site_calc_flag
  _atom_site_refinement_flags_posn
  _atom_site_refinement_flags_adp
  _atom_site_refinement_flags_occupancy
  _atom_site_disorder_assembly
  _atom_site_disorder_group
 Au1 Au 0.37607(2) 0.70127(2) 0.76384(2) 0.01457(5) Uani 1 1 d . . . . .
 N2 N 0.2298(2) 0.77909(11) 0.76088(11) 0.0181(4) Uani 1 1 d . . . . .
 N1 N 0.55476(18) 0.59280(10) 0.70246(11) 0.0148(3) Uani 1 1 d . . . . .
 C1 C 0.5088(2) 0.62024(12) 0.76537(13) 0.0160(4) Uani 1 1 d . . . . .
 C34 C 0.1406(2) 0.79008(12) 0.81809(14) 0.0173(4) Uani 1 1 d . . . . .
 C23 C 0.1875(2) 0.82469(12) 0.69941(13) 0.0178(4) Uani 1 1 d . . . . .
 C6 C 0.6114(2) 0.68430(13) 0.60509(13) 0.0171(4) Uani 1 1 d . . . . .
 C5 C 0.5247(2) 0.62748(11) 0.62589(12) 0.0148(4) Uani 1 1 d . . . . .
 C24 C 0.2404(3) 0.82999(13) 0.62611(14) 0.0221(5) Uani 1 1 d . . . . .
 H24 H 0.317297 0.801548 0.614177 0.027 Uiso 1 1 calc R U . . .
 C28 C 0.0732(2) 0.86748(12) 0.71745(13) 0.0183(4) Uani 1 1 d . . . . .
 C14 C 0.2994(2) 0.55269(13) 0.60140(13) 0.0193(4) Uani 1 1 d . . . . .
 H14 H 0.335140 0.530533 0.652704 0.023 Uiso 1 1 calc R U . . .
 C17 C 0.4588(3) 0.56048(14) 0.89207(14) 0.0247(5) Uani 1 1 d . . . . .
 H17A H 0.501518 0.529771 0.935267 0.030 Uiso 1 1 calc R U . . .
 H17B H 0.427274 0.605896 0.915779 0.030 Uiso 1 1 calc R U . . .
 C2 C 0.5709(2) 0.57996(12) 0.83734(13) 0.0175(4) Uani 1 1 d . . . . .
 C29 C 0.0429(2) 0.84494(12) 0.79469(13) 0.0184(4) Uani 1 1 d . . . . .
 C11 C 0.7233(2) 0.71858(13) 0.66149(14) 0.0191(4) Uani 1 1 d . . . . .
 H11 H 0.733463 0.688417 0.710304 0.023 Uiso 1 1 calc R U . . .
 C33 C 0.1360(2) 0.75338(13) 0.88918(13) 0.0202(4) Uani 1 1 d . . . . .
 H33 H 0.201346 0.716416 0.904474 0.024 Uiso 1 1 calc R U . . .
 C10 C 0.4066(2) 0.60645(11) 0.57722(13) 0.0157(4) Uani 1 1 d . . . . .
 C12 C 0.6787(3) 0.79502(12) 0.68393(17) 0.0245(5) Uani 1 1 d . . . . .
 H12A H 0.670099 0.825971 0.637112 0.037 Uiso 1 1 calc R U . . .
 H12B H 0.748198 0.815601 0.722986 0.037 Uiso 1 1 calc R U . . .
 H12C H 0.589370 0.792423 0.706049 0.037 Uiso 1 1 calc R U . . .
 C3 C 0.6405(3) 0.51306(13) 0.80387(13) 0.0216(5) Uani 1 1 d . . . . .
 H3A H 0.585806 0.468761 0.812023 0.026 Uiso 1 1 calc R U . . .
 H3B H 0.734596 0.506404 0.830557 0.026 Uiso 1 1 calc R U . . .
 C32 C 0.0342(3) 0.77205(13) 0.93681(14) 0.0227(5) Uani 1 1 d . . . . .
 H32 H 0.029924 0.747651 0.985453 0.027 Uiso 1 1 calc R U . . .
 C7 C 0.5849(3) 0.71456(13) 0.53037(15) 0.0213(5) Uani 1 1 d . . . . .
 H7 H 0.645079 0.750898 0.513627 0.026 Uiso 1 1 calc R U . . .
 C15 C 0.1633(3) 0.59211(15) 0.61270(15) 0.0273(5) Uani 1 1 d . . . . .
 H15A H 0.181007 0.631231 0.651201 0.041 Uiso 1 1 calc R U . . .
 H15B H 0.097230 0.557557 0.631617 0.041 Uiso 1 1 calc R U . . .
 H15C H 0.124945 0.612704 0.562493 0.041 Uiso 1 1 calc R U . . .
 C30 C -0.0593(2) 0.86311(13) 0.84418(15) 0.0233(5) Uani 1 1 d . . . . .
 H30 H -0.125007 0.900059 0.829533 0.028 Uiso 1 1 calc R U . . .
 C31 C -0.0629(3) 0.82649(14) 0.91449(15) 0.0254(5) Uani 1 1 d . . . . .
 H31 H -0.132081 0.838305 0.948141 0.030 Uiso 1 1 calc R U . . .
 C25 C 0.1770(3) 0.87793(13) 0.57167(14) 0.0258(5) Uani 1 1 d . . . . .
 H25 H 0.211107 0.882306 0.521634 0.031 Uiso 1 1 calc R U . . .
 C13 C 0.8646(3) 0.72152(15) 0.62811(15) 0.0253(5) Uani 1 1 d . . . . .
 H13A H 0.887510 0.673311 0.608744 0.038 Uiso 1 1 calc R U . . .
 H13B H 0.935493 0.736572 0.669474 0.038 Uiso 1 1 calc R U . . .
 H13C H 0.860832 0.756552 0.584829 0.038 Uiso 1 1 calc R U . . .
 C9 C 0.3827(2) 0.64048(13) 0.50423(13) 0.0197(4) Uani 1 1 d . . . . .
 H9 H 0.303288 0.627597 0.470406 0.024 Uiso 1 1 calc R U . . .
 C4 C 0.6480(2) 0.52646(12) 0.71541(13) 0.0186(4) Uani 1 1 d . . . . .
 C19 C 0.6783(3) 0.63275(13) 0.87966(14) 0.0227(5) Uani 1 1 d . . . . .
 H19A H 0.751327 0.642718 0.844472 0.027 Uiso 1 1 calc R U . . .
 H19B H 0.631657 0.679370 0.889021 0.027 Uiso 1 1 calc R U . . .
 C16 C 0.2728(3) 0.49140(14) 0.54100(15) 0.0270(5) Uani 1 1 d . . . . .
 H16A H 0.232210 0.511781 0.491134 0.041 Uiso 1 1 calc R U . . .
 H16B H 0.208726 0.455962 0.560362 0.041 Uiso 1 1 calc R U . . .
 H16C H 0.360308 0.467324 0.532931 0.041 Uiso 1 1 calc R U . . .
 C8 C 0.4723(3) 0.69252(13) 0.48020(14) 0.0218(5) Uani 1 1 d . . . . .
 H8 H 0.456733 0.713195 0.429265 0.026 Uiso 1 1 calc R U . . .
 C21 C 0.5894(3) 0.46263(13) 0.66591(14) 0.0229(5) Uani 1 1 d . . . . .
 H21A H 0.496655 0.450930 0.680284 0.034 Uiso 1 1 calc R U . . .
 H21B H 0.649833 0.420272 0.675473 0.034 Uiso 1 1 calc R U . . .
 H21C H 0.584196 0.475711 0.610187 0.034 Uiso 1 1 calc R U . . .
 C20 C 0.7462(3) 0.60449(15) 0.95780(16) 0.0325(6) Uani 1 1 d . . . . .
 H20A H 0.785273 0.556181 0.950161 0.049 Uiso 1 1 calc R U . . .
 H20B H 0.676914 0.601343 0.995753 0.049 Uiso 1 1 calc R U . . .
 H20C H 0.820141 0.637780 0.977670 0.049 Uiso 1 1 calc R U . . .
 C27 C 0.0111(2) 0.91556(13) 0.66122(15) 0.0234(5) Uani 1 1 d . . . . .
 H27 H -0.065606 0.944454 0.672591 0.028 Uiso 1 1 calc R U . . .
 C26 C 0.0632(3) 0.92026(13) 0.58889(15) 0.0263(5) Uani 1 1 d . . . . .
 H26 H 0.021486 0.952547 0.550314 0.032 Uiso 1 1 calc R U . . .
 C22 C 0.7934(2) 0.54355(14) 0.69353(15) 0.0246(5) Uani 1 1 d . . . . .
 H22A H 0.788266 0.560692 0.639106 0.037 Uiso 1 1 calc R U . . .
 H22B H 0.850358 0.499537 0.698907 0.037 Uiso 1 1 calc R U . . .
 H22C H 0.834973 0.581367 0.728528 0.037 Uiso 1 1 calc R U . . .
 C18 C 0.3331(3) 0.52101(16) 0.85339(17) 0.0346(6) Uani 1 1 d . . . . .
 H18A H 0.286520 0.551882 0.812374 0.052 Uiso 1 1 calc R U . . .
 H18B H 0.269283 0.510018 0.892852 0.052 Uiso 1 1 calc R U . . .
 H18C H 0.362488 0.475648 0.829948 0.052 Uiso 1 1 calc R U . . .

loop_
  _atom_site_aniso_label
  _atom_site_aniso_U_11
  _atom_site_aniso_U_22
  _atom_site_aniso_U_33
  _atom_site_aniso_U_23
  _atom_site_aniso_U_13
  _atom_site_aniso_U_12
 Au1 0.01574(7) 0.01400(7) 0.01392(7) 0.00006(3) 0.00116(4) 0.00246(3)
 N2 0.0202(9) 0.0168(9) 0.0172(9) 0.0007(7) 0.0006(7) 0.0023(8)
 N1 0.0171(8) 0.0117(8) 0.0152(9) 0.0005(7) -0.0002(7) 0.0029(7)
 C1 0.0173(10) 0.0140(10) 0.0163(10) -0.0009(8) -0.0001(8) -0.0024(8)
 C34 0.0144(10) 0.0162(10) 0.0207(12) -0.0032(8) -0.0008(9) 0.0009(8)
 C23 0.0194(10) 0.0140(11) 0.0188(11) -0.0003(8) -0.0038(8) -0.0017(8)
 C6 0.0174(10) 0.0166(10) 0.0174(11) -0.0006(9) 0.0023(8) 0.0019(9)
 C5 0.0186(10) 0.0137(10) 0.0121(9) 0.0003(8) 0.0019(8) 0.0021(8)
 C24 0.0269(12) 0.0189(12) 0.0204(11) -0.0030(9) 0.0013(9) -0.0021(9)
 C28 0.0193(10) 0.0147(10) 0.0195(11) -0.0011(8) -0.0046(8) -0.0025(8)
 C14 0.0209(11) 0.0197(11) 0.0170(10) 0.0004(8) 0.0015(8) -0.0037(9)
 C17 0.0295(12) 0.0271(13) 0.0176(11) 0.0061(9) 0.0025(9) 0.0012(10)
 C2 0.0205(10) 0.0159(10) 0.0158(10) 0.0007(8) 0.0002(8) 0.0039(8)
 C29 0.0180(10) 0.0145(10) 0.0223(11) -0.0014(8) -0.0009(8) -0.0005(8)
 C11 0.0197(11) 0.0169(10) 0.0207(11) 0.0007(9) 0.0013(9) -0.0021(9)
 C33 0.0212(11) 0.0183(11) 0.0207(11) 0.0000(9) -0.0008(9) 0.0040(9)
 C10 0.0181(10) 0.0129(10) 0.0161(10) -0.0003(8) 0.0017(8) 0.0007(8)
 C12 0.0239(13) 0.0216(13) 0.0281(14) -0.0058(9) 0.0031(10) -0.0042(9)
 C3 0.0318(12) 0.0171(11) 0.0153(10) 0.0001(8) -0.0007(9) 0.0061(9)
 C32 0.0251(12) 0.0225(12) 0.0206(11) 0.0003(9) 0.0031(9) 0.0017(9)
 C7 0.0247(12) 0.0181(10) 0.0215(12) 0.0032(9) 0.0043(9) -0.0038(9)
 C15 0.0215(12) 0.0351(14) 0.0255(12) -0.0016(10) 0.0037(9) -0.0020(10)
 C30 0.0206(11) 0.0193(11) 0.0297(12) -0.0028(9) 0.0013(9) 0.0055(9)
 C31 0.0241(12) 0.0246(13) 0.0284(13) -0.0035(10) 0.0080(10) 0.0070(10)
 C25 0.0358(13) 0.0220(12) 0.0184(11) 0.0014(9) -0.0041(10) -0.0098(10)
 C13 0.0219(12) 0.0256(12) 0.0285(13) -0.0034(10) 0.0039(10) -0.0041(10)
 C9 0.0207(11) 0.0213(11) 0.0164(10) -0.0012(8) -0.0013(8) 0.0020(9)
 C4 0.0228(11) 0.0150(11) 0.0180(10) 0.0019(8) 0.0013(9) 0.0061(8)
 C19 0.0256(12) 0.0208(11) 0.0208(11) -0.0024(9) -0.0026(9) 0.0044(9)
 C16 0.0337(13) 0.0233(13) 0.0245(12) -0.0032(10) 0.0051(10) -0.0107(10)
 C8 0.0292(13) 0.0208(11) 0.0149(11) 0.0037(8) 0.0000(9) 0.0011(9)
 C21 0.0327(13) 0.0160(11) 0.0192(11) -0.0022(9) -0.0010(9) 0.0047(9)
 C20 0.0376(15) 0.0297(14) 0.0272(13) -0.0068(11) -0.0127(11) 0.0094(11)
 C27 0.0216(11) 0.0161(11) 0.0308(13) 0.0038(9) -0.0070(9) -0.0019(9)
 C26 0.0296(12) 0.0205(12) 0.0261(12) 0.0052(9) -0.0115(10) -0.0074(10)
 C22 0.0226(11) 0.0222(12) 0.0291(12) 0.0010(10) 0.0024(9) 0.0067(9)
 C18 0.0344(14) 0.0356(15) 0.0338(14) 0.0101(12) 0.0031(11) -0.0095(12)

_geom_special_details
;
 All esds (except the esd in the dihedral angle between two l.s. planes)
 are estimated using the full covariance matrix.  The cell esds are taken
 into account individually in the estimation of esds in distances, angles
 and torsion angles; correlations between esds in cell parameters are only
 used when they are defined by crystal symmetry.  An approximate (isotropic)
 treatment of cell esds is used for estimating esds involving l.s. planes.
;
loop_
  _geom_bond_atom_site_label_1
  _geom_bond_atom_site_label_2
  _geom_bond_distance
  _geom_bond_site_symmetry_2
  _geom_bond_publ_flag
 Au1 N2 2.0144(19) . ?
 Au1 C1 1.970(2) . ?
 N2 C34 1.382(3) . ?
 N2 C23 1.378(3) . ?
 N1 C1 1.305(3) . ?
 N1 C5 1.462(3) . ?
 N1 C4 1.524(3) . ?
 C1 C2 1.513(3) . ?
 C34 C29 1.417(3) . ?
 C34 C33 1.396(3) . ?
 C23 C24 1.402(3) . ?
 C23 C28 1.419(3) . ?
 C6 C5 1.409(3) . ?
 C6 C11 1.521(3) . ?
 C6 C7 1.396(3) . ?
 C5 C10 1.407(3) . ?
 C24 H24 0.9500 . ?
 C24 C25 1.385(3) . ?
 C28 C29 1.442(3) . ?
 C28 C27 1.401(3) . ?
 C14 H14 1.0000 . ?
 C14 C10 1.522(3) . ?
 C14 C15 1.535(3) . ?
 C14 C16 1.535(3) . ?
 C17 H17A 0.9900 . ?
 C17 H17B 0.9900 . ?
 C17 C2 1.543(3) . ?
 C17 C18 1.518(4) . ?
 C2 C3 1.540(3) . ?
 C2 C19 1.554(3) . ?
 C29 C30 1.404(3) . ?
 C11 H11 1.0000 . ?
 C11 C12 1.531(3) . ?
 C11 C13 1.536(3) . ?
 C33 H33 0.9500 . ?
 C33 C32 1.382(3) . ?
 C10 C9 1.397(3) . ?
 C12 H12A 0.9800 . ?
 C12 H12B 0.9800 . ?
 C12 H12C 0.9800 . ?
 C3 H3A 0.9900 . ?
 C3 H3B 0.9900 . ?
 C3 C4 1.542(3) . ?
 C32 H32 0.9500 . ?
 C32 C31 1.404(3) . ?
 C7 H7 0.9500 . ?
 C7 C8 1.385(4) . ?
 C15 H15A 0.9800 . ?
 C15 H15B 0.9800 . ?
 C15 H15C 0.9800 . ?
 C30 H30 0.9500 . ?
 C30 C31 1.382(4) . ?
 C31 H31 0.9500 . ?
 C25 H25 0.9500 . ?
 C25 C26 1.406(4) . ?
 C13 H13A 0.9800 . ?
 C13 H13B 0.9800 . ?
 C13 H13C 0.9800 . ?
 C9 H9 0.9500 . ?
 C9 C8 1.382(3) . ?
 C4 C21 1.527(3) . ?
 C4 C22 1.527(3) . ?
 C19 H19A 0.9900 . ?
 C19 H19B 0.9900 . ?
 C19 C20 1.526(3) . ?
 C16 H16A 0.9800 . ?
 C16 H16B 0.9800 . ?
 C16 H16C 0.9800 . ?
 C8 H8 0.9500 . ?
 C21 H21A 0.9800 . ?
 C21 H21B 0.9800 . ?
 C21 H21C 0.9800 . ?
 C20 H20A 0.9800 . ?
 C20 H20B 0.9800 . ?
 C20 H20C 0.9800 . ?
 C27 H27 0.9500 . ?
 C27 C26 1.383(4) . ?
 C26 H26 0.9500 . ?
 C22 H22A 0.9800 . ?
 C22 H22B 0.9800 . ?
 C22 H22C 0.9800 . ?
 C18 H18A 0.9800 . ?
 C18 H18B 0.9800 . ?
 C18 H18C 0.9800 . ?

loop_
  _geom_angle_atom_site_label_1
  _geom_angle_atom_site_label_2
  _geom_angle_atom_site_label_3
  _geom_angle
  _geom_angle_site_symmetry_1
  _geom_angle_site_symmetry_3
  _geom_angle_publ_flag
 C1 Au1 N2 176.06(8) . . ?
 C34 N2 Au1 125.03(15) . . ?
 C23 N2 Au1 127.66(16) . . ?
 C23 N2 C34 106.86(19) . . ?
 C1 N1 C5 121.03(18) . . ?
 C1 N1 C4 115.76(18) . . ?
 C5 N1 C4 123.08(17) . . ?
 N1 C1 Au1 123.78(16) . . ?
 N1 C1 C2 109.92(18) . . ?
 C2 C1 Au1 126.30(15) . . ?
 N2 C34 C29 110.6(2) . . ?
 N2 C34 C33 128.3(2) . . ?
 C33 C34 C29 121.1(2) . . ?
 N2 C23 C24 128.1(2) . . ?
 N2 C23 C28 110.8(2) . . ?
 C24 C23 C28 121.0(2) . . ?
 C5 C6 C11 123.8(2) . . ?
 C7 C6 C5 117.7(2) . . ?
 C7 C6 C11 118.3(2) . . ?
 C6 C5 N1 118.49(19) . . ?
 C10 C5 N1 119.55(19) . . ?
 C10 C5 C6 121.9(2) . . ?
 C23 C24 H24 121.0 . . ?
 C25 C24 C23 118.0(2) . . ?
 C25 C24 H24 121.0 . . ?
 C23 C28 C29 105.73(19) . . ?
 C27 C28 C23 119.8(2) . . ?
 C27 C28 C29 134.4(2) . . ?
 C10 C14 H14 108.3 . . ?
 C10 C14 C15 110.25(19) . . ?
 C10 C14 C16 111.77(19) . . ?
 C15 C14 H14 108.3 . . ?
 C16 C14 H14 108.3 . . ?
 C16 C14 C15 109.8(2) . . ?
 H17A C17 H17B 107.5 . . ?
 C2 C17 H17A 108.4 . . ?
 C2 C17 H17B 108.4 . . ?
 C18 C17 H17A 108.4 . . ?
 C18 C17 H17B 108.4 . . ?
 C18 C17 C2 115.5(2) . . ?
 C1 C2 C17 110.96(18) . . ?
 C1 C2 C3 104.14(17) . . ?
 C1 C2 C19 105.75(18) . . ?
 C17 C2 C19 110.06(19) . . ?
 C3 C2 C17 113.5(2) . . ?
 C3 C2 C19 111.98(19) . . ?
 C34 C29 C28 106.0(2) . . ?
 C30 C29 C34 119.4(2) . . ?
 C30 C29 C28 134.5(2) . . ?
 C6 C11 H11 108.0 . . ?
 C6 C11 C12 109.8(2) . . ?
 C6 C11 C13 112.88(19) . . ?
 C12 C11 H11 108.0 . . ?
 C12 C11 C13 110.1(2) . . ?
 C13 C11 H11 108.0 . . ?
 C34 C33 H33 120.8 . . ?
 C32 C33 C34 118.5(2) . . ?
 C32 C33 H33 120.8 . . ?
 C5 C10 C14 123.95(19) . . ?
 C9 C10 C5 117.6(2) . . ?
 C9 C10 C14 118.3(2) . . ?
 C11 C12 H12A 109.5 . . ?
 C11 C12 H12B 109.5 . . ?
 C11 C12 H12C 109.5 . . ?
 H12A C12 H12B 109.5 . . ?
 H12A C12 H12C 109.5 . . ?
 H12B C12 H12C 109.5 . . ?
 C2 C3 H3A 110.2 . . ?
 C2 C3 H3B 110.2 . . ?
 C2 C3 C4 107.46(18) . . ?
 H3A C3 H3B 108.5 . . ?
 C4 C3 H3A 110.2 . . ?
 C4 C3 H3B 110.2 . . ?
 C33 C32 H32 119.5 . . ?
 C33 C32 C31 121.1(2) . . ?
 C31 C32 H32 119.5 . . ?
 C6 C7 H7 119.4 . . ?
 C8 C7 C6 121.2(2) . . ?
 C8 C7 H7 119.4 . . ?
 C14 C15 H15A 109.5 . . ?
 C14 C15 H15B 109.5 . . ?
 C14 C15 H15C 109.5 . . ?
 H15A C15 H15B 109.5 . . ?
 H15A C15 H15C 109.5 . . ?
 H15B C15 H15C 109.5 . . ?
 C29 C30 H30 120.5 . . ?
 C31 C30 C29 119.1(2) . . ?
 C31 C30 H30 120.5 . . ?
 C32 C31 H31 119.6 . . ?
 C30 C31 C32 120.9(2) . . ?
 C30 C31 H31 119.6 . . ?
 C24 C25 H25 119.3 . . ?
 C24 C25 C26 121.4(2) . . ?
 C26 C25 H25 119.3 . . ?
 C11 C13 H13A 109.5 . . ?
 C11 C13 H13B 109.5 . . ?
 C11 C13 H13C 109.5 . . ?
 H13A C13 H13B 109.5 . . ?
 H13A C13 H13C 109.5 . . ?
 H13B C13 H13C 109.5 . . ?
 C10 C9 H9 119.3 . . ?
 C8 C9 C10 121.4(2) . . ?
 C8 C9 H9 119.3 . . ?
 N1 C4 C3 100.86(17) . . ?
 N1 C4 C21 110.50(18) . . ?
 N1 C4 C22 110.50(18) . . ?
 C21 C4 C3 111.83(19) . . ?
 C21 C4 C22 109.1(2) . . ?
 C22 C4 C3 113.8(2) . . ?
 C2 C19 H19A 108.7 . . ?
 C2 C19 H19B 108.7 . . ?
 H19A C19 H19B 107.6 . . ?
 C20 C19 C2 114.3(2) . . ?
 C20 C19 H19A 108.7 . . ?
 C20 C19 H19B 108.7 . . ?
 C14 C16 H16A 109.5 . . ?
 C14 C16 H16B 109.5 . . ?
 C14 C16 H16C 109.5 . . ?
 H16A C16 H16B 109.5 . . ?
 H16A C16 H16C 109.5 . . ?
 H16B C16 H16C 109.5 . . ?
 C7 C8 H8 120.0 . . ?
 C9 C8 C7 120.0(2) . . ?
 C9 C8 H8 120.0 . . ?
 C4 C21 H21A 109.5 . . ?
 C4 C21 H21B 109.5 . . ?
 C4 C21 H21C 109.5 . . ?
 H21A C21 H21B 109.5 . . ?
 H21A C21 H21C 109.5 . . ?
 H21B C21 H21C 109.5 . . ?
 C19 C20 H20A 109.5 . . ?
 C19 C20 H20B 109.5 . . ?
 C19 C20 H20C 109.5 . . ?
 H20A C20 H20B 109.5 . . ?
 H20A C20 H20C 109.5 . . ?
 H20B C20 H20C 109.5 . . ?
 C28 C27 H27 120.5 . . ?
 C26 C27 C28 118.9(2) . . ?
 C26 C27 H27 120.5 . . ?
 C25 C26 H26 119.5 . . ?
 C27 C26 C25 120.9(2) . . ?
 C27 C26 H26 119.5 . . ?
 C4 C22 H22A 109.5 . . ?
 C4 C22 H22B 109.5 . . ?
 C4 C22 H22C 109.5 . . ?
 H22A C22 H22B 109.5 . . ?
 H22A C22 H22C 109.5 . . ?
 H22B C22 H22C 109.5 . . ?
 C17 C18 H18A 109.5 . . ?
 C17 C18 H18B 109.5 . . ?
 C17 C18 H18C 109.5 . . ?
 H18A C18 H18B 109.5 . . ?
 H18A C18 H18C 109.5 . . ?
 H18B C18 H18C 109.5 . . ?

loop_
  _geom_torsion_atom_site_label_1
  _geom_torsion_atom_site_label_2
  _geom_torsion_atom_site_label_3
  _geom_torsion_atom_site_label_4
  _geom_torsion
  _geom_torsion_site_symmetry_1
  _geom_torsion_site_symmetry_2
  _geom_torsion_site_symmetry_3
  _geom_torsion_site_symmetry_4
  _geom_torsion_publ_flag
 Au1 N2 C34 C29 -174.85(15) . . . . ?
 Au1 N2 C34 C33 2.9(3) . . . . ?
 Au1 N2 C23 C24 -3.2(3) . . . . ?
 Au1 N2 C23 C28 174.55(15) . . . . ?
 Au1 C1 C2 C17 45.7(3) . . . . ?
 Au1 C1 C2 C3 168.16(16) . . . . ?
 Au1 C1 C2 C19 -73.7(2) . . . . ?
 N2 C34 C29 C28 1.3(3) . . . . ?
 N2 C34 C29 C30 178.6(2) . . . . ?
 N2 C34 C33 C32 -178.0(2) . . . . ?
 N2 C23 C24 C25 177.1(2) . . . . ?
 N2 C23 C28 C29 -1.2(2) . . . . ?
 N2 C23 C28 C27 -177.5(2) . . . . ?
 N1 C1 C2 C17 -133.5(2) . . . . ?
 N1 C1 C2 C3 -11.0(2) . . . . ?
 N1 C1 C2 C19 107.2(2) . . . . ?
 N1 C5 C10 C14 4.7(3) . . . . ?
 N1 C5 C10 C9 -179.35(19) . . . . ?
 C1 N1 C5 C6 85.0(3) . . . . ?
 C1 N1 C5 C10 -91.3(3) . . . . ?
 C1 N1 C4 C3 5.0(2) . . . . ?
 C1 N1 C4 C21 123.4(2) . . . . ?
 C1 N1 C4 C22 -115.7(2) . . . . ?
 C1 C2 C3 C4 13.8(2) . . . . ?
 C1 C2 C19 C20 175.8(2) . . . . ?
 C34 N2 C23 C24 -175.8(2) . . . . ?
 C34 N2 C23 C28 2.0(3) . . . . ?
 C34 C29 C30 C31 -0.5(4) . . . . ?
 C34 C33 C32 C31 0.2(4) . . . . ?
 C23 N2 C34 C29 -2.1(3) . . . . ?
 C23 N2 C34 C33 175.7(2) . . . . ?
 C23 C24 C25 C26 0.1(3) . . . . ?
 C23 C28 C29 C34 -0.1(2) . . . . ?
 C23 C28 C29 C30 -176.7(3) . . . . ?
 C23 C28 C27 C26 -0.1(3) . . . . ?
 C6 C5 C10 C14 -171.5(2) . . . . ?
 C6 C5 C10 C9 4.5(3) . . . . ?
 C6 C7 C8 C9 1.0(4) . . . . ?
 C5 N1 C1 Au1 8.6(3) . . . . ?
 C5 N1 C1 C2 -172.22(18) . . . . ?
 C5 N1 C4 C3 -179.05(19) . . . . ?
 C5 N1 C4 C21 -60.6(3) . . . . ?
 C5 N1 C4 C22 60.2(3) . . . . ?
 C5 C6 C11 C12 -107.9(3) . . . . ?
 C5 C6 C11 C13 128.8(2) . . . . ?
 C5 C6 C7 C8 3.8(4) . . . . ?
 C5 C10 C9 C8 0.5(3) . . . . ?
 C24 C23 C28 C29 176.8(2) . . . . ?
 C24 C23 C28 C27 0.4(3) . . . . ?
 C24 C25 C26 C27 0.3(4) . . . . ?
 C28 C23 C24 C25 -0.4(3) . . . . ?
 C28 C29 C30 C31 175.7(2) . . . . ?
 C28 C27 C26 C25 -0.3(3) . . . . ?
 C14 C10 C9 C8 176.8(2) . . . . ?
 C17 C2 C3 C4 134.6(2) . . . . ?
 C17 C2 C19 C20 55.9(3) . . . . ?
 C2 C3 C4 N1 -11.4(2) . . . . ?
 C2 C3 C4 C21 -128.9(2) . . . . ?
 C2 C3 C4 C22 106.9(2) . . . . ?
 C29 C34 C33 C32 -0.4(3) . . . . ?
 C29 C28 C27 C26 -175.1(2) . . . . ?
 C29 C30 C31 C32 0.3(4) . . . . ?
 C11 C6 C5 N1 -8.3(3) . . . . ?
 C11 C6 C5 C10 167.9(2) . . . . ?
 C11 C6 C7 C8 -171.0(2) . . . . ?
 C33 C34 C29 C28 -176.6(2) . . . . ?
 C33 C34 C29 C30 0.6(3) . . . . ?
 C33 C32 C31 C30 -0.1(4) . . . . ?
 C10 C9 C8 C7 -3.2(4) . . . . ?
 C3 C2 C19 C20 -71.4(3) . . . . ?
 C7 C6 C5 N1 177.2(2) . . . . ?
 C7 C6 C5 C10 -6.6(3) . . . . ?
 C7 C6 C11 C12 66.6(3) . . . . ?
 C7 C6 C11 C13 -56.7(3) . . . . ?
 C15 C14 C10 C5 110.0(2) . . . . ?
 C15 C14 C10 C9 -66.0(3) . . . . ?
 C4 N1 C1 Au1 -175.34(15) . . . . ?
 C4 N1 C1 C2 3.8(3) . . . . ?
 C4 N1 C5 C6 -90.8(2) . . . . ?
 C4 N1 C5 C10 92.9(2) . . . . ?
 C19 C2 C3 C4 -100.0(2) . . . . ?
 C16 C14 C10 C5 -127.6(2) . . . . ?
 C16 C14 C10 C9 56.5(3) . . . . ?
 C27 C28 C29 C34 175.5(2) . . . . ?
 C27 C28 C29 C30 -1.2(5) . . . . ?
 C18 C17 C2 C1 52.2(3) . . . . ?
 C18 C17 C2 C3 -64.7(3) . . . . ?
 C18 C17 C2 C19 168.9(2) . . . . ?

_shelx_res_file
;
TITL rar39_a.res in P2(1)/c
    rar39.res
    created by SHELXL-2018/3 at 23:23:04 on 28-Apr-2023
REM Old TITL rar39 in P2(1)/c
REM SHELXT solution in P2(1)/c: R1 0.049, Rweak 0.006, Alpha 0.031
REM <I/s> 2.879 for 213 systematic absences, Orientation as input
REM Formula found by SHELXT: C14 C5 Au
CELL 1.54184 9.711632 18.402182 17.110545 90 95.3962 90
ZERR 4 0.000052 0.000103 0.000102 0 0.0005 0
LATT 1
SYMM -X,0.5+Y,0.5-Z
SFAC C H Au N
UNIT 136 172 4 8

L.S. 8
PLAN  10
SIZE 0.11 0.25 0.26
TEMP -173.15(10)
CONF
MORE -1
BOND $H
fmap 2
acta
OMIT 10 5 9
REM <olex2.extras>
REM <HklSrc "%.\\rar39.hkl">
REM </olex2.extras>

WGHT    0.032800    2.896700
EXTI    0.000635
FVAR       0.39242
AU1   3    0.376073    0.701273    0.763837    11.00000    0.01574    0.01400 =
         0.01392    0.00006    0.00116    0.00246
N2    4    0.229791    0.779086    0.760879    11.00000    0.02016    0.01680 =
         0.01719    0.00069    0.00060    0.00233
N1    4    0.554757    0.592799    0.702459    11.00000    0.01712    0.01175 =
         0.01522    0.00052   -0.00018    0.00288
C1    1    0.508823    0.620243    0.765373    11.00000    0.01729    0.01400 =
         0.01635   -0.00090   -0.00007   -0.00237
C34   1    0.140552    0.790082    0.818093    11.00000    0.01438    0.01623 =
         0.02068   -0.00318   -0.00077    0.00090
C23   1    0.187535    0.824686    0.699406    11.00000    0.01944    0.01404 =
         0.01876   -0.00032   -0.00384   -0.00169
C6    1    0.611373    0.684303    0.605092    11.00000    0.01740    0.01656 =
         0.01740   -0.00058    0.00228    0.00194
C5    1    0.524738    0.627478    0.625890    11.00000    0.01862    0.01370 =
         0.01214    0.00028    0.00186    0.00211
C24   1    0.240363    0.829986    0.626112    11.00000    0.02691    0.01885 =
         0.02044   -0.00298    0.00132   -0.00214
AFIX  43
H24   2    0.317297    0.801548    0.614177    11.00000   -1.20000
AFIX   0
C28   1    0.073221    0.867477    0.717451    11.00000    0.01928    0.01473 =
         0.01954   -0.00113   -0.00458   -0.00248
C14   1    0.299397    0.552694    0.601403    11.00000    0.02094    0.01974 =
         0.01703    0.00041    0.00147   -0.00369
AFIX  13
H14   2    0.335140    0.530533    0.652704    11.00000   -1.20000
AFIX   0
C17   1    0.458809    0.560483    0.892070    11.00000    0.02950    0.02708 =
         0.01759    0.00610    0.00247    0.00125
AFIX  23
H17A  2    0.501518    0.529771    0.935267    11.00000   -1.20000
H17B  2    0.427274    0.605896    0.915779    11.00000   -1.20000
AFIX   0
C2    1    0.570901    0.579956    0.837335    11.00000    0.02047    0.01591 =
         0.01585    0.00071    0.00015    0.00395
C29   1    0.042925    0.844937    0.794687    11.00000    0.01804    0.01447 =
         0.02227   -0.00144   -0.00085   -0.00046
C11   1    0.723279    0.718576    0.661485    11.00000    0.01966    0.01694 =
         0.02071    0.00071    0.00134   -0.00206
AFIX  13
H11   2    0.733463    0.688417    0.710304    11.00000   -1.20000
AFIX   0
C33   1    0.136008    0.753376    0.889176    11.00000    0.02119    0.01830 =
         0.02066    0.00005   -0.00079    0.00398
AFIX  43
H33   2    0.201346    0.716416    0.904474    11.00000   -1.20000
AFIX   0
C10   1    0.406618    0.606452    0.577217    11.00000    0.01810    0.01293 =
         0.01610   -0.00033    0.00169    0.00074
C12   1    0.678726    0.795024    0.683928    11.00000    0.02386    0.02160 =
         0.02806   -0.00579    0.00310   -0.00424
AFIX 137
H12A  2    0.670099    0.825971    0.637112    11.00000   -1.50000
H12B  2    0.748198    0.815601    0.722986    11.00000   -1.50000
H12C  2    0.589370    0.792423    0.706049    11.00000   -1.50000
AFIX   0
C3    1    0.640501    0.513059    0.803868    11.00000    0.03180    0.01712 =
         0.01533    0.00013   -0.00067    0.00610
AFIX  23
H3A   2    0.585806    0.468761    0.812023    11.00000   -1.20000
H3B   2    0.734596    0.506404    0.830557    11.00000   -1.20000
AFIX   0
C32   1    0.034217    0.772049    0.936813    11.00000    0.02513    0.02252 =
         0.02062    0.00030    0.00310    0.00167
AFIX  43
H32   2    0.029924    0.747651    0.985453    11.00000   -1.20000
AFIX   0
C7    1    0.584879    0.714561    0.530369    11.00000    0.02466    0.01811 =
         0.02146    0.00316    0.00435   -0.00378
AFIX  43
H7    2    0.645079    0.750898    0.513627    11.00000   -1.20000
AFIX   0
C15   1    0.163341    0.592111    0.612700    11.00000    0.02154    0.03506 =
         0.02549   -0.00158    0.00370   -0.00198
AFIX 137
H15A  2    0.181007    0.631231    0.651201    11.00000   -1.50000
H15B  2    0.097230    0.557557    0.631617    11.00000   -1.50000
H15C  2    0.124945    0.612704    0.562493    11.00000   -1.50000
AFIX   0
C30   1   -0.059283    0.863108    0.844176    11.00000    0.02064    0.01933 =
         0.02969   -0.00283    0.00127    0.00552
AFIX  43
H30   2   -0.125007    0.900059    0.829533    11.00000   -1.20000
AFIX   0
C31   1   -0.062940    0.826489    0.914485    11.00000    0.02413    0.02456 =
         0.02842   -0.00347    0.00797    0.00697
AFIX  43
H31   2   -0.132081    0.838305    0.948141    11.00000   -1.20000
AFIX   0
C25   1    0.176985    0.877927    0.571666    11.00000    0.03585    0.02204 =
         0.01840    0.00143   -0.00406   -0.00982
AFIX  43
H25   2    0.211107    0.882306    0.521634    11.00000   -1.20000
AFIX   0
C13   1    0.864562    0.721519    0.628113    11.00000    0.02193    0.02564 =
         0.02852   -0.00344    0.00393   -0.00410
AFIX 137
H13A  2    0.887510    0.673311    0.608744    11.00000   -1.50000
H13B  2    0.935493    0.736572    0.669474    11.00000   -1.50000
H13C  2    0.860832    0.756552    0.584829    11.00000   -1.50000
AFIX   0
C9    1    0.382738    0.640484    0.504228    11.00000    0.02073    0.02131 =
         0.01641   -0.00119   -0.00133    0.00197
AFIX  43
H9    2    0.303288    0.627597    0.470406    11.00000   -1.20000
AFIX   0
C4    1    0.648028    0.526464    0.715411    11.00000    0.02281    0.01499 =
         0.01797    0.00185    0.00128    0.00606
C19   1    0.678259    0.632750    0.879662    11.00000    0.02561    0.02079 =
         0.02081   -0.00238   -0.00257    0.00439
AFIX  23
H19A  2    0.751327    0.642718    0.844472    11.00000   -1.20000
H19B  2    0.631657    0.679370    0.889021    11.00000   -1.20000
AFIX   0
C16   1    0.272750    0.491397    0.540995    11.00000    0.03375    0.02331 =
         0.02449   -0.00318    0.00510   -0.01073
AFIX 137
H16A  2    0.232210    0.511781    0.491134    11.00000   -1.50000
H16B  2    0.208726    0.455962    0.560362    11.00000   -1.50000
H16C  2    0.360308    0.467324    0.532931    11.00000   -1.50000
AFIX   0
C8    1    0.472335    0.692525    0.480205    11.00000    0.02919    0.02076 =
         0.01491    0.00369   -0.00004    0.00114
AFIX  43
H8    2    0.456733    0.713195    0.429265    11.00000   -1.20000
AFIX   0
C21   1    0.589433    0.462630    0.665907    11.00000    0.03270    0.01602 =
         0.01919   -0.00221   -0.00099    0.00473
AFIX 137
H21A  2    0.496655    0.450930    0.680284    11.00000   -1.50000
H21B  2    0.649833    0.420272    0.675473    11.00000   -1.50000
H21C  2    0.584196    0.475711    0.610187    11.00000   -1.50000
AFIX   0
C20   1    0.746224    0.604486    0.957798    11.00000    0.03758    0.02969 =
         0.02724   -0.00679   -0.01272    0.00940
AFIX 137
H20A  2    0.785273    0.556181    0.950161    11.00000   -1.50000
H20B  2    0.676914    0.601343    0.995753    11.00000   -1.50000
H20C  2    0.820141    0.637780    0.977670    11.00000   -1.50000
AFIX   0
C27   1    0.011076    0.915556    0.661218    11.00000    0.02156    0.01614 =
         0.03077    0.00378   -0.00704   -0.00192
AFIX  43
H27   2   -0.065606    0.944454    0.672591    11.00000   -1.20000
AFIX   0
C26   1    0.063181    0.920259    0.588893    11.00000    0.02964    0.02055 =
         0.02606    0.00520   -0.01149   -0.00740
AFIX  43
H26   2    0.021486    0.952547    0.550314    11.00000   -1.20000
AFIX   0
C22   1    0.793432    0.543545    0.693528    11.00000    0.02264    0.02218 =
         0.02909    0.00096    0.00244    0.00669
AFIX 137
H22A  2    0.788266    0.560692    0.639106    11.00000   -1.50000
H22B  2    0.850358    0.499537    0.698907    11.00000   -1.50000
H22C  2    0.834973    0.581367    0.728528    11.00000   -1.50000
AFIX   0
C18   1    0.333146    0.521012    0.853385    11.00000    0.03439    0.03555 =
         0.03377    0.01008    0.00312   -0.00954
AFIX 137
H18A  2    0.286520    0.551882    0.812374    11.00000   -1.50000
H18B  2    0.269283    0.510018    0.892852    11.00000   -1.50000
H18C  2    0.362488    0.475648    0.829948    11.00000   -1.50000
AFIX   0
HKLF 4


REM  rar39_a.res in P2(1)/c
REM wR2 = 0.0564, GooF = S = 1.115, Restrained GooF = 1.115 for all data
REM R1 = 0.0207 for 6060 Fo > 4sig(Fo) and 0.0208 for all 6090 data
REM 343 parameters refined using 0 restraints

END

WGHT      0.0328      2.8966

REM Highest difference peak  0.845,  deepest hole -0.974,  1-sigma level  0.083
Q1    1   0.2803  0.7007  0.7781  11.00000  0.05    0.85
Q2    1   0.4808  0.7046  0.7527  11.00000  0.05    0.77
Q3    1   0.3771  0.7719  0.7626  11.00000  0.05    0.63
Q4    1   0.4253  0.7348  0.8143  11.00000  0.05    0.61
Q5    1   0.3376  0.6689  0.7166  11.00000  0.05    0.56
Q6    1   0.3816  0.6308  0.7625  11.00000  0.05    0.54
Q7    1   0.3290  0.7388  0.7133  11.00000  0.05    0.53
Q8    1   0.4205  0.6689  0.8161  11.00000  0.05    0.51
Q9    1   0.6271  0.3873  0.7377  11.00000  0.05    0.47
Q10   1   0.2774  0.7502  0.7778  11.00000  0.05    0.45
;
_shelx_res_checksum                86372
_shelx_hkl_file
;
   0   0  -1    3.26    0.25
   0   0  -1    3.30    0.26
   0   0   1    2.68    0.25
   0   0  -3    0.70    0.47
   0   0   3    0.74    0.46
   0   0   5    5.92    0.88
   0   0   5    2.42    0.70
   0   0   7    9.95    1.23
   0   0   7    9.93    1.24
   0   0   8 3669.19   52.81
   0   0   8 3812.27   52.62
   0   0   9    2.70    0.97
   0   0   9    9.03    1.38
   0   0  10  974.45   17.48
   0   0  11    2.13    1.02
   0   0 -12  811.27   16.65
   0   0  12  869.51   16.89
   0   0 -13    2.59    1.52
   0   0  13    1.62    1.12
   0   0  14  694.96   15.59
   0   0 -14  732.28   16.25
   0   0  15    0.41    1.29
   0   0 -15    1.03    1.66
   0   0 -16   82.85    5.02
   0   0 -17    1.08    1.68
   0   0 -18   12.63    2.21
   0   0 -19    2.39    1.50
   0   0 -20   44.95    3.01
   0   0 -21    1.60    1.05
   0  -1   0    1.97    0.20
   0   1  -1  169.24    2.68
   0  -1   1  169.64    2.84
   0   1   2   44.32    1.26
   0   1  -2   42.14    1.24
   0   1   3  246.02    4.40
   0   1  -3  230.64    4.31
   0  -1   3  242.57    4.46
   0   1   4  392.21    6.86
   0  -1   4  389.52    6.86
   0   1   5   10.91    1.04
   0  -1   5   12.74    1.16
   0   1   6 3248.32   45.14
   0   1   7  135.20    4.23
   0  -1   7  140.14    4.28
   0   1   8 2316.97   34.51
   0  -1   8 2380.82   34.46
   0   1   8 2301.99   34.10
   0   1   9   79.05    3.62
   0   1   9   79.86    3.49
   0   1  10 2985.32   43.51
   0  -1  10 2921.24   43.88
   0   1  11  534.25   11.63
   0  -1  11  507.48   11.69
   0   1 -12 3798.11   57.99
   0  -1  12 3931.93   58.35
   0   1  13  475.94   11.80
   0  -1  13  468.39   12.12
   0   1 -14 4019.89   59.21
   0  -1  14 3864.05   58.74
   0   1  14 3821.94   57.97
   0   1 -15  388.27   11.14
   0  -1  15  349.94   10.57
   0   1 -16 3635.45   56.15
   0   1 -17  322.07    9.99
   0   1 -18 2397.14   38.75
   0   1 -19  278.42    8.24
   0   1 -20 1672.87   27.10
   0   1 -21  173.68    5.15
   0   2   3 1352.75   19.07
   0  -2   3 1367.26   19.33
   0   2   5 2370.42   32.32
   0  -2   5 2322.63   32.53
   0   2   7 4661.04   64.62
   0  -2   7 4644.82   64.57
   0   2   7 4793.68   64.24
   0   2   8 5131.52   71.51
   0  -2   8 5140.64   71.51
   0   2   8 5266.93   71.09
   0   2   9 2170.44   33.25
   0  -2   9 2223.34   33.24
   0   2   9 2136.42   32.59
   0  -2  10 1793.35   28.56
   0   2  10 1743.43   27.93
   0  -2  11  121.84    5.07
   0   2  11  108.14    4.59
   0   2 -12  935.40   18.25
   0  -2 -12  932.73   17.75
   0   2  12  938.92   17.93
   0  -2  12  939.63   18.55
   0  -2 -13  229.49    7.76
   0   2 -13  233.30    7.86
   0  -2  13  223.78    7.87
   0   2  13  207.87    7.25
   0  -2 -13  226.97    7.36
   0  -2 -14  412.44   11.32
   0   2 -14  415.23   11.38
   0  -2  14  404.85   11.98
   0  -2 -14  409.20   10.65
   0  -2  14  403.38   11.30
   0  -2  15  322.80   10.15
   0   2 -15  345.07   10.44
   0  -2 -15  347.68   10.46
   0  -2  15  334.76   10.98
   0  -2 -15  337.96    9.51
   0  -2 -16  279.68    9.44
   0   2 -16  302.89    9.73
   0   2 -17    8.48    2.19
   0   2 -18    6.06    1.89
   0   2 -19   13.23    2.11
   0  -2 -19   12.29    2.09
   0  -2 -20  164.25    5.60
   0   2 -20  158.20    5.51
   0   2 -21   14.32    1.60
   0  -2 -21   14.83    1.64
   0   3   0    1.51    0.65
   0  -3   0    1.33    0.45
   0  -3   1  267.69    3.88
   0  -3   1  253.64    4.97
   0   3   1  271.71    3.88
   0  -3   1  263.66    5.04
   0  -3  -1  263.13    4.39
   0  -3  -1  270.22    5.18
   0  -3   2  658.08    9.56
   0   3   2  689.91    9.59
   0  -3   2  644.98   10.13
   0  -3  -2  646.42   10.68
   0  -3   2  662.18   10.26
   0  -3  -2  685.14   10.01
   0  -3   3  572.01    9.26
   0   3   3  590.76    8.92
   0  -3   3  565.28    8.87
   0  -3  -3  600.13    9.37
   0  -3   3  581.22    9.44
   0  -3   4   30.51    1.43
   0   3   4   29.39    1.42
   0  -3   5 1530.25   22.79
   0   3   5 1582.17   22.83
   0  -3   5 1610.86   23.30
   0   3   6 1322.82   19.84
   0  -3   6 1280.51   19.78
   0  -3   6 1290.69   20.19
   0  -3   7 3047.48   43.91
   0   3   7 3099.60   43.94
   0  -3   7 3187.18   44.36
   0  -3   8 4906.69   68.72
   0   3   8 4894.34   68.70
   0   3   8 4939.80   68.26
   0   3   9 2250.20   34.70
   0   3   9 2345.13   34.23
   0  -3   9 2275.64   34.96
   0  -3  10 1061.72   19.03
   0   3  10 1023.75   18.13
   0  -3  11 3242.98   49.70
   0  -3  11 3219.67   49.34
   0   3  11 3364.27   48.53
   0   3 -12 1181.04   21.72
   0  -3  12 1186.70   22.64
   0  -3 -12 1166.05   21.46
   0   3  12 1233.22   21.48
   0  -3  12 1186.11   22.25
   0   3 -13 1673.18   28.91
   0  -3 -13 1654.31   28.76
   0  -3  13 1611.01   29.67
   0  -3  13 1726.95   29.58
   0  -3 -13 1654.04   28.40
   0   3 -14 1106.41   21.58
   0  -3 -14 1089.99   21.45
   0  -3  14 1068.74   22.31
   0  -3  14 1093.43   21.82
   0  -3 -14 1081.82   20.88
   0  -3 -15 2083.64   34.77
   0   3 -15 2116.28   34.98
   0  -3 -15 2057.47   33.72
   0  -3  15 1986.12   34.68
   0  -3 -16  576.52   14.18
   0   3 -16  573.52   14.24
   0  -3 -16  564.29   13.19
   0   3 -17 1962.58   32.66
   0  -3 -17 1916.10   32.48
   0   3 -18 1175.77   21.98
   0  -3 -18 1151.36   21.76
   0  -3 -19 1262.88   22.26
   0   3 -19 1250.43   22.20
   0  -3 -20  531.66   11.26
   0   3 -20  525.94   11.19
   0  -3 -21  723.08   12.87
   0   3 -21  718.28   12.82
   0   4   0  497.95    8.86
   0  -4   0  520.26    8.48
   0  -4   1 1654.90   24.52
   0  -4   1 1625.19   24.48
   0  -4  -1 1743.56   23.38
   0  -4  -1 1760.24   24.57
   0  -4   2 1850.68   25.98
   0  -4   2 1888.17   26.09
   0  -4  -2 1859.28   25.30
   0  -4   4 1293.94   19.32
   0  -4   4 1288.98   19.60
   0  -4   4 1313.89   18.69
   0   4   4 1274.51   18.70
   0  -4   6  205.29    5.34
   0  -4   6  211.23    5.48
   0   4   6  208.29    5.01
   0  -4   6  204.98    5.01
   0  -4   7 4610.08   64.93
   0   4   7 4709.95   64.38
   0  -4   7 4709.16   64.37
   0  -4   8  162.50    5.30
   0   4   8  159.37    4.96
   0  -4   9 4816.14   69.11
   0   4   9 4802.15   67.96
   0   4   9 4870.57   68.61
   0  -4  10  524.45   11.89
   0   4  10  501.85   10.79
   0  -4  10  528.48   11.95
   0   4 -11 2739.95   42.09
   0  -4  11 2787.13   43.47
   0  -4 -11 2756.10   42.43
   0  -4  11 2876.70   43.42
   0   4  11 2773.81   41.82
   0   4  12  123.84    5.07
   0  -4  12  119.08    5.56
   0   4 -12  118.90    5.24
   0  -4 -12  122.27    5.29
   0  -4  12  118.46    5.62
   0  -4  13  949.52   19.96
   0  -4 -13  982.94   19.33
   0   4 -13  979.33   19.36
   0  -4 -13  972.58   19.25
   0  -4  13  954.05   20.30
   0  -4  14  369.24   11.01
   0  -4 -14  375.54   10.67
   0   4 -14  377.46   10.69
   0  -4 -14  372.42   10.47
   0  -4  14  347.49   11.16
   0  -4  15  142.43    6.66
   0  -4 -15  160.51    6.75
   0   4 -15  157.13    6.72
   0  -4 -15  155.70    6.42
   0  -4  15  135.62    6.92
   0  -4 -16    8.65    1.95
   0   4 -16   10.27    2.20
   0  -4 -16    9.39    2.16
   0  -4 -17   11.71    1.99
   0   4 -17   13.29    2.33
   0  -4 -17   12.96    2.29
   0  -4 -18    6.10    1.55
   0  -4 -18    5.15    1.75
   0   4 -18    5.76    1.79
   0  -4 -19   42.67    3.09
   0   4 -19   42.34    3.04
   0  -4 -20    2.09    1.23
   0   4 -20    2.58    1.21
   0  -5   0    2.15    0.58
   0  -5   0    2.72    0.78
   0  -5  -1  950.28   15.10
   0  -5   1  927.54   14.46
   0  -5   1  972.58   14.89
   0  -5  -1  933.99   13.78
   0  -5  -2   33.88    1.45
   0  -5   2   32.84    2.07
   0  -5  -2   30.76    2.22
   0  -5   2   32.60    1.99
   0  -5  -3 2119.67   29.57
   0  -5   3 2142.02   30.47
   0  -5   3 2029.40   30.22
   0  -5   3 2094.75   28.61
   0   5   3 2118.27   28.58
   0  -5   4   76.23    2.87
   0  -5   4   81.32    2.94
   0   5   4   76.67    2.28
   0  -5   4   74.68    2.26
   0  -5   5 1348.28   21.35
   0  -5   5 1373.44   20.37
   0   5   5 1385.57   20.36
   0  -5   6   18.85    1.71
   0  -5   6   22.29    1.77
   0  -5   6   19.45    1.42
   0   5   6   19.08    1.39
   0  -5   7 2079.20   31.96
   0   5   7 2074.55   31.03
   0  -5   7 2083.46   31.14
   0  -5   8    5.08    1.19
   0   5   8    4.36    1.01
   0  -5   9 4030.14   57.07
   0  -5   9 3810.96   56.65
   0  -5  10   13.17    1.85
   0  -5  10    9.22    1.71
   0   5  10    9.75    1.40
   0   5 -11 2432.96   38.52
   0  -5  11 2485.94   40.11
   0   5  11 2525.32   38.18
   0  -5 -11 2468.13   39.15
   0  -5 -12   28.07    2.71
   0   5 -12   29.09    2.74
   0  -5  12   27.43    2.88
   0  -5  12   30.21    2.91
   0  -5 -12   37.98    3.11
   0  -5 -13 2347.46   37.69
   0   5 -13 2363.32   37.73
   0  -5  13 2216.45   39.08
   0  -5 -13 2346.55   37.95
   0  -5  13 2346.27   38.79
   0  -5  14    8.55    1.98
   0  -5 -14   14.43    2.25
   0  -5  14    9.47    1.98
   0  -5 -14   10.03    2.04
   0   5 -14   12.92    2.22
   0  -5 -15 1269.31   23.63
   0   5 -15 1258.13   23.62
   0  -5 -15 1233.46   23.44
   0  -5 -16   52.37    3.76
   0   5 -16   49.50    3.78
   0  -5 -16   48.85    3.74
   0  -5 -17 2200.66   35.61
   0  -5 -17 2227.35   36.27
   0   5 -17 2248.28   36.30
   0  -5 -18   77.07    3.87
   0   5 -18   80.73    4.29
   0  -5 -18   81.81    4.33
   0   5 -19 1874.66   29.84
   0  -5 -19 1874.71   29.92
   0  -5 -20   11.27    1.62
   0   5 -20   11.03    1.55
   0  -6   0  435.52    7.53
   0   6   0  445.00    8.48
   0  -6   0  455.48    8.46
   0  -6   2  945.51   16.30
   0  -6   2  968.62   16.45
   0  -6  -2  916.99   16.81
   0  -6   4 1469.55   22.76
   0  -6  -4 1464.79   21.70
   0  -6   5 4181.14   58.31
   0   6   5 4181.89   56.23
   0  -6   5 4058.84   58.10
   0  -6   5 4158.69   56.29
   0  -6   6   62.67    2.55
   0   6   6   62.12    2.52
   0  -6   6   67.50    3.21
   0  -6   7 4572.15   66.21
   0  -6   7 4827.89   66.32
   0  -6   8  307.21    8.29
   0  -6   8  322.14    8.47
   0  -6   9 2254.27   36.11
   0  -6   9 2318.81   36.15
   0   6  10   27.78    2.21
   0  -6  10   26.33    2.58
   0  -6 -10   27.58    2.55
   0  -6  10   30.21    2.78
   0  -6  11 1017.33   20.70
   0  -6  11 1001.92   18.89
   0  -6  11 1088.21   20.66
   0   6 -11  995.47   18.86
   0  -6  11 1097.11   19.82
   0  -6 -11 1020.99   19.74
   0  -6  12   17.88    2.39
   0   6 -12   15.56    2.12
   0  -6 -12   12.35    2.12
   0  -6 -12   14.43    2.09
   0  -6 -13  393.17   10.65
   0   6 -13  399.48   10.66
   0  -6  13  383.01   11.75
   0  -6  13  384.69   11.36
   0  -6 -13  389.18   11.00
   0  -6 -14    4.82    1.74
   0  -6  14    7.28    1.88
   0  -6  14    7.44    2.13
   0  -6 -14    8.12    1.96
   0  -6 -15   17.77    2.53
   0   6 -15   12.54    2.20
   0  -6 -15   13.17    2.24
   0  -6 -16   28.52    2.92
   0  -6 -16   29.63    2.96
   0   6 -16   31.37    2.98
   0  -6 -17   37.65    3.08
   0   6 -17   37.02    3.10
   0  -6 -17   41.25    3.24
   0  -6 -18   35.47    2.73
   0   6 -18   37.43    2.92
   0  -6 -18   38.65    2.97
   0  -6 -19    7.02    1.35
   0  -6 -19    5.08    1.46
   0   6 -19    5.34    1.42
   0   6 -20    1.16    1.02
   0  -7   0    3.50    0.94
   0   7   0    4.41    0.88
   0  -7   1    7.04    0.97
   0  -7   1    5.65    1.02
   0  -7  -1    5.87    1.36
   0   7   1    8.71    1.35
   0  -7  -2  233.44    4.96
   0  -7   2  233.73    6.01
   0  -7   2  229.42    5.71
   0  -7  -3   59.85    2.34
   0  -7   3   50.91    3.08
   0  -7  -3   59.11    3.18
   0  -7   3   52.41    3.08
   0  -7   4   52.40    3.08
   0  -7  -4   55.26    2.44
   0  -7   4   55.68    3.24
   0  -7   5  863.63   16.17
   0  -7   5  879.72   16.38
   0  -7   6  627.29   12.59
   0  -7   6  638.64   13.23
   0  -7   7  852.82   16.21
   0  -7   7  866.30   16.80
   0  -7   8  430.39   10.47
   0  -7   8  432.09   10.88
   0  -7   9 1409.48   24.74
   0  -7   9 1386.48   25.27
   0  -7  10  331.10   10.09
   0  -7  10  331.48    8.97
   0  -7  10  338.74    9.32
   0  -7 -10  322.81    9.15
   0  -7  10  341.64    9.76
   0  -7  11 1498.75   27.88
   0  -7  11 1432.17   25.29
   0  -7  11 1511.54   26.27
   0  -7 -11 1448.10   26.08
   0  -7  11 1510.21   27.03
   0  -7  12 1027.77   21.95
   0  -7  12  965.93   19.27
   0  -7 -12 1040.47   19.55
   0   7 -12  999.74   19.25
   0  -7 -12 1012.99   20.35
   0  -7  12 1058.09   20.07
   0  -7  12 1032.71   21.15
   0  -7  13 2556.70   40.03
   0  -7  13 2443.35   43.00
   0  -7 -13 2493.41   40.84
   0  -7 -13 2533.51   39.87
   0   7 -13 2510.25   39.70
   0  -7  13 2446.53   41.54
   0  -7  14 1176.88   25.72
   0  -7 -14 1218.50   22.72
   0   7 -14 1220.75   22.64
   0  -7 -14 1215.72   23.60
   0  -7  14 1201.35   24.25
   0  -7 -15 2110.39   34.84
   0   7 -15 2092.90   34.65
   0  -7 -15 2141.33   35.79
   0   7 -16  252.47    8.05
   0  -7 -16  255.85    8.13
   0  -7 -16  257.90    8.53
   0   7 -17 1288.75   22.98
   0  -7 -17 1331.44   23.29
   0  -7 -17 1307.48   23.53
   0   7 -18  638.47   13.18
   0  -7 -18  666.87   13.47
   0  -7 -18  631.95   13.22
   0   7 -19  721.17   13.25
   0  -7 -19  712.72   13.37
   0  -7 -19  683.47   12.94
   0  -8   0 3816.12   52.47
   0  -8   0 3929.19   54.76
   0   8   0 3849.79   53.53
   0  -8   1 3825.39   52.49
   0  -8  -1 3809.65   55.05
   0  -8   1 3896.71   53.99
   0   8   1 3749.13   54.36
   0  -8  -2 4821.53   71.16
   0   8   2 4612.36   70.25
   0  -8  -3 1758.18   25.93
   0  -8   3 1784.86   28.21
   0  -8   3 1779.37   27.28
   0  -8  -3 1735.26   28.39
   0  -8   4 2047.92   34.30
   0  -8   4 2045.19   34.31
   0  -8   5 2001.57   33.11
   0  -8   5 2038.87   33.25
   0  -8   6 2428.52   38.95
   0  -8   7 1097.82   21.28
   0  -8   7 1086.86   19.85
   0  -8   8 1563.25   28.17
   0  -8   8 1526.44   26.48
   0  -8   9 1470.36   25.52
   0  -8   9 1499.22   26.12
   0  -8   9 1457.68   26.42
   0  -8 -10  414.32   10.98
   0  -8  10  426.82   10.83
   0  -8  10  444.39   12.78
   0  -8  10  448.61   11.44
   0  -8  10  434.88   11.70
   0  -8 -11  361.97   10.49
   0  -8  11  366.07   10.07
   0  -8  11  380.96   10.08
   0  -8  11  379.42   11.09
   0  -8  11  395.53   10.73
   0  -8  12  877.73   20.90
   0  -8  12  861.14   17.74
   0  -8  12  859.02   19.21
   0  -8 -12  880.91   17.46
   0  -8 -12  897.85   18.80
   0  -8  12  930.80   18.52
   0  -8  13  144.46    7.73
   0  -8  13  141.25    6.72
   0  -8  13  138.79    5.90
   0  -8  13  153.84    6.29
   0  -8 -13  143.99    5.91
   0  -8 -13  147.58    6.63
   0  -8 -14  667.56   14.90
   0   8 -14  660.99   14.71
   0  -8 -14  698.78   16.19
   0  -8 -15   29.90    2.83
   0   8 -15   31.31    2.88
   0  -8 -15   28.58    3.15
   0  -8 -16    4.20    1.62
   0   8 -16    4.47    1.58
   0  -8 -16    6.44    1.89
   0   8 -17   13.11    1.99
   0  -8 -17   13.57    2.02
   0  -8 -17   12.01    1.97
   0  -8 -18    9.52    1.64
   0  -8 -18    8.84    1.65
   0  -8 -19    0.79    0.94
   0  -9   0    5.68    0.89
   0  -9   0    4.76    1.32
   0  -9   1   68.96    2.66
   0  -9  -1   62.32    2.45
   0   9   1   66.06    3.17
   0  -9   1   67.43    3.40
   0  -9  -1   63.45    3.74
   0  -9   2  209.05    5.46
   0  -9  -2  206.96    5.03
   0  -9   2  213.41    6.24
   0  -9  -2  198.24    7.14
   0  -9  -3   21.50    2.25
   0  -9   3   18.45    1.85
   0  -9  -3   18.59    1.50
   0  -9   3   20.38    1.95
   0  -9   4  409.33    9.66
   0  -9  -4  415.24    8.68
   0  -9   4  424.67   10.56
   0  -9   5  253.05    8.56
   0  -9   6 2030.40   35.25
   0  -9   7  658.35   16.41
   0  -9   8 1729.36   29.91
   0  -9   8 1775.40   29.82
   0  -9   8 1744.76   29.43
   0  -9   9  435.21   11.78
   0  -9   9  461.97   11.70
   0  -9   9  452.88   11.41
   0  -9  10 2294.40   38.54
   0  -9  10 2313.02   37.99
   0  -9  10 2295.63   37.45
   0  -9  11  124.51    5.63
   0  -9  11  131.90    7.56
   0  -9 -11  128.80    6.02
   0  -9  11  130.12    6.27
   0  -9  11  128.54    5.62
   0  -9  11  130.14    6.04
   0  -9  12 2591.17   42.47
   0  -9  12 2751.88   48.39
   0  -9 -12 2707.60   43.81
   0  -9  12 2656.32   44.46
   0  -9  12 2772.17   42.56
   0  -9  12 2772.29   43.44
   0  -9  13  499.30   16.05
   0  -9  13  497.51   13.69
   0  -9  13  507.76   12.79
   0  -9  13  476.52   12.20
   0  -9 -13  505.00   13.28
   0  -9 -14 2435.77   38.79
   0  -9 -14 2509.42   41.11
   0  -9  14 2419.55   39.57
   0  -9 -15  412.31   11.47
   0  -9 -15  395.98   10.16
   0  -9 -16 1605.53   28.11
   0  -9 -17  168.39    6.21
   0  -9 -18 1924.74   30.21
   0  -9 -19  126.53    4.21
   0 -10   1  297.69    6.59
   0  10   1  309.70    7.49
   0 -10   1  306.98    8.48
   0 -10  -1  296.32    9.18
   0 -10  -1  290.24    6.44
   0 -10   2 5885.03   79.46
   0  10   2 5745.50   81.77
   0 -10   2 5936.46   81.90
   0 -10  -2 5936.10   79.04
   0  10   3    5.22    1.43
   0 -10  -3    7.12    1.72
   0 -10   3    6.06    1.35
   0 -10   3    7.89    1.28
   0 -10  -3    6.87    1.06
   0 -10   4 6963.89   94.49
   0 -10   4 6786.29   94.39
   0 -10  -4 6672.99   92.12
   0 -10   5   23.42    2.31
   0 -10   5   18.42    2.39
   0 -10   6 3747.68   58.59
   0 -10   7   34.51    2.97
   0 -10   7   35.13    2.92
   0 -10   7   36.76    3.88
   0 -10   8 1678.86   29.36
   0 -10   8 1723.22   29.30
   0 -10   8 1734.59   34.06
   0 -10   9   92.58    4.84
   0 -10  -9   86.47    4.71
   0 -10   9   91.54    5.10
   0 -10   9   95.99    5.04
   0 -10  10 2214.60   36.57
   0 -10 -10 2174.82   36.86
   0 -10  10 2163.45   37.57
   0 -10  10 2228.87   36.98
   0 -10  11   56.07    5.42
   0 -10  11   51.62    3.75
   0 -10  11   52.79    3.97
   0 -10  11   56.34    4.22
   0 -10  11   55.82    3.85
   0 -10  12  978.06   19.89
   0 -10  12  936.78   24.55
   0 -10 -12  954.99   20.09
   0 -10  12  976.80   19.12
   0 -10  12  911.38   20.50
   0 -10  12  902.84   19.03
   0 -10  13   17.69    2.39
   0 -10  13   20.51    2.54
   0 -10  13   20.82    2.34
   0 -10 -13   20.86    2.86
   0 -10  14  474.54   12.14
   0 -10  14  510.64   12.33
   0 -10 -14  497.78   13.11
   0 -10  15   21.34    2.59
   0 -10  15   19.69    2.24
   0 -10 -15   20.42    2.67
   0 -10 -16   49.92    3.61
   0 -10 -17   76.00    4.03
   0 -10 -18   75.87    3.63
   0 -10 -19   10.95    1.39
   0 -11   0    1.11    0.64
   0 -11   0   32.49    3.12
   0 -11  -1  185.89    4.99
   0 -11  -1  193.31    7.81
   0 -11   1  197.62    7.16
   0 -11   1  187.88    5.05
   0 -11  -2   55.10    2.62
   0 -11   2   64.96    3.89
   0 -11  -2   57.63    4.31
   0 -11   2   61.27    2.78
   0 -11  -3  516.23   10.46
   0 -11   3  552.85   10.99
   0 -11  -3  556.77   13.31
   0 -11   3  535.25   12.62
   0 -11   4  692.97   13.81
   0 -11   4  666.81   14.77
   0 -11   5  323.33    9.26
   0 -11   5  323.29    9.39
   0 -11   6 1257.86   24.15
   0 -11   6 1210.82   22.98
   0 -11   6 1211.95   22.60
   0 -11   6 1239.22   22.58
   0 -11   7   27.97    3.43
   0 -11   7   33.86    3.14
   0 -11   7   32.21    3.00
   0 -11  -8 1117.63   21.44
   0 -11   8 1143.64   21.91
   0 -11   8 1117.83   21.90
   0 -11   8 1128.93   25.58
   0 -11   9   12.69    2.27
   0 -11  -9   15.50    2.37
   0 -11   9    8.28    2.64
   0 -11   9   20.16    2.61
   0 -11  10 2421.55   39.69
   0 -11  10 2346.85   45.66
   0 -11 -10 2390.80   39.54
   0 -11  10 2458.66   39.52
   0 -11  10 2294.81   40.35
   0 -11  10 2403.14   39.33
   0 -11  11  109.60    5.67
   0 -11 -11  105.21    5.65
   0 -11  11  110.55    5.52
   0 -11  11  104.96    5.91
   0 -11  11  103.29    5.38
   0 -11  12 2385.47   38.82
   0 -11  12 2376.72   38.23
   0 -11  13  267.45    8.75
   0 -11  13  258.33    8.54
   0 -11  13  264.25    8.23
   0 -11 -14 2346.12   38.64
   0 -11  14 2368.41   37.35
   0 -11  14 2239.56   37.22
   0 -11 -15  112.16    5.49
   0 -11  15  117.49    4.87
   0 -11  15  107.98    5.21
   0 -11 -16 2211.75   35.51
   0 -11 -17  133.41    5.14
   0 -11 -18 1603.09   25.22
   0 -12   0 6084.54   86.47
   0 -12   0 5735.86   79.18
   0 -12   1 2382.33   35.26
   0 -12   1 2527.15   40.85
   0 -12  -1 2409.93   41.97
   0 -12  -1 2440.05   35.37
   0 -12   2 4301.09   60.25
   0 -12   2 4504.83   65.39
   0 -12  -2 4318.63   66.40
   0 -12  -2 4292.85   60.26
   0 -12   3 1979.33   30.40
   0 -12   3 2104.00   34.48
   0 -12  -3 2107.32   34.44
   0 -12  -3 1933.28   30.21
   0 -12   4 4219.09   60.09
   0 -12   4 4224.46   63.25
   0 -12   5 1892.67   30.58
   0 -12   5 1864.46   32.51
   0 -12   6 2240.86   36.67
   0 -12   6 2243.40   36.81
   0 -12   6 2281.07   36.71
   0 -12   6 2193.54   37.50
   0 -12  -7  947.87   18.90
   0 -12   7  958.62   19.56
   0 -12   7  948.58   19.58
   0 -12   7  992.50   20.73
   0 -12   7  932.12   20.14
   0 -12   8 2034.86   34.37
   0 -12   8 1956.40   35.08
   0 -12   8 2050.65   34.61
   0 -12  -8 2005.60   33.82
   0 -12   9  188.18    7.57
   0 -12  -9  190.84    7.46
   0 -12   9  199.10    7.65
   0 -12  10 1677.97   30.05
   0 -12  10 1675.81   29.94
   0 -12 -10 1650.02   29.83
   0 -12  10 1628.86   29.65
   0 -12  11  443.73   12.31
   0 -12  11  469.31   12.36
   0 -12 -11  450.57   12.52
   0 -12  11  447.02   12.16
   0 -12  12  755.49   16.81
   0 -12  12  760.08   16.44
   0 -12 -12  743.44   17.19
   0 -12  12  731.25   16.43
   0 -12  13   14.69    2.26
   0 -12  13   14.15    2.00
   0 -12  13   13.67    2.21
   0 -12  14  229.88    6.98
   0 -12  14  232.05    7.71
   0 -12  14  239.40    7.68
   0 -12 -15   16.86    2.35
   0 -12  15   18.93    2.40
   0 -12  15   17.27    2.00
   0 -12 -16  139.00    5.50
   0 -12  17    0.36    1.46
   0 -12 -17    1.77    1.30
   0 -12 -18    4.28    1.17
   0 -13   0    3.84    1.96
   0 -13  -1   21.40    3.23
   0 -13   1   22.58    3.04
   0 -13  -2   75.62    5.13
   0 -13   2   69.40    4.86
   0 -13   3   42.19    3.74
   0 -13   4  555.16   13.25
   0 -13   4  562.64   13.29
   0 -13   4  540.35   14.35
   0 -13   5  640.07   14.90
   0 -13   5  659.13   16.17
   0 -13   5  648.92   14.91
   0 -13   6  389.25   13.64
   0 -13  -6  372.57   10.08
   0 -13   6  366.38   11.47
   0 -13   7 1136.75   22.51
   0 -13  -7 1132.61   21.70
   0 -13   7 1122.52   23.61
   0 -13   7 1154.47   22.62
   0 -13   8 1296.22   24.81
   0 -13   8 1269.87   24.75
   0 -13  -8 1284.47   24.14
   0 -13   8 1270.07   25.93
   0 -13   9 1080.46   21.74
   0 -13   9 1072.92   21.76
   0 -13   9 1113.28   22.04
   0 -13  -9 1037.20   21.32
   0 -13   9 1001.68   22.60
   0 -13  10  842.33   18.35
   0 -13 -10  820.13   18.19
   0 -13  10  817.29   18.15
   0 -13  10  827.48   18.36
   0 -13  11 2008.22   34.20
   0 -13 -11 2007.87   34.52
   0 -13  11 1945.34   33.89
   0 -13  11 1990.11   34.27
   0 -13  12 1009.04   19.88
   0 -13 -12  999.96   20.65
   0 -13  12  979.86   19.95
   0 -13  12  992.42   20.19
   0 -13  13 1091.27   20.25
   0 -13 -13 1110.09   21.66
   0 -13  13 1064.06   20.74
   0 -13  13 1075.06   20.83
   0 -13  14  791.69   15.68
   0 -13  14  752.11   14.81
   0 -13  14  759.67   15.85
   0 -13  15  760.54   15.16
   0 -13  15  736.74   13.90
   0 -13  16  643.46   15.31
   0 -13 -16  830.45   15.15
   0 -13 -17 1143.30   19.24
   0 -14   0 1002.87   24.06
   0 -14   1 3696.27   56.27
   0 -14   1 3781.78   56.21
   0 -14   1 3928.69   62.63
   0 -14  -1 3852.63   62.16
   0 -14   2  882.37   18.13
   0 -14   2  918.49   21.67
   0 -14  -2  933.46   20.83
   0 -14   2  888.27   18.03
   0 -14   3 2196.90   36.81
   0 -14   3 2285.11   40.48
   0 -14   3 2289.61   37.02
   0 -14   3 2293.53   37.88
   0 -14   4  811.88   17.43
   0 -14   4  842.05   19.78
   0 -14   4  840.68   17.55
   0 -14   4  849.32   18.89
   0 -14   5 3137.45   47.27
   0 -14   5 3263.97   50.25
   0 -14  -5 2793.83   44.76
   0 -14   5 3214.64   47.25
   0 -14   5 3045.80   49.53
   0 -14   6  121.66    6.69
   0 -14   6  135.36    7.52
   0 -14  -6  115.44    5.30
   0 -14   7 3719.30   57.18
   0 -14   7 3809.45   57.61
   0 -14   7 3673.31   57.24
   0 -14   7 3908.36   63.10
   0 -14  -7 3605.11   55.78
   0 -14   7 3623.60   59.40
   0 -14   8  497.16   13.25
   0 -14   8  495.01   13.34
   0 -14   8  474.76   13.04
   0 -14   8  525.03   17.15
   0 -14  -8  485.27   12.61
   0 -14   8  474.60   14.26
   0 -14   9 1600.24   29.34
   0 -14   9 1580.97   29.17
   0 -14   9 1654.37   35.73
   0 -14  -9 1591.46   28.67
   0 -14   9 1567.75   28.99
   0 -14  10  442.98   12.33
   0 -14  10  439.69   12.25
   0 -14  10  461.63   16.57
   0 -14 -10  440.48   12.13
   0 -14  10  442.43   12.17
   0 -14  11  706.78   15.93
   0 -14  11  693.28   16.03
   0 -14  11  693.39   20.53
   0 -14 -11  711.71   16.17
   0 -14  11  685.59   15.83
   0 -14  12  207.89    7.30
   0 -14  12  209.60    7.57
   0 -14  12  203.83   10.27
   0 -14 -12  216.98    7.84
   0 -14  12  201.41    7.36
   0 -14  13  402.64   10.10
   0 -14  13  422.03   10.70
   0 -14  13  378.57   13.42
   0 -14 -13  419.00   11.12
   0 -14  13  401.17   10.55
   0 -14  14   73.01    3.54
   0 -14  14   63.23    4.82
   0 -14  14   74.06    4.04
   0 -14 -14   78.14    4.31
   0 -14  14   72.69    3.80
   0 -14 -15  320.31    8.54
   0 -14  15  303.60    7.40
   0 -15   0    3.53    1.39
   0 -15   0    4.78    1.56
   0 -15   0    3.09    1.29
   0 -15  -1   82.82    4.22
   0 -15   1   78.93    4.45
   0 -15   1   78.44    4.37
   0 -15  -1   78.14    4.06
   0 -15  -1   77.37    4.53
   0 -15   1   71.94    4.36
   0 -15   1   80.94    6.29
   0 -15  -1   92.09    6.19
   0 -15   1   80.48    4.39
   0 -15  -1   70.57    3.99
   0 -15   2   25.03    2.71
   0 -15   2   27.34    2.75
   0 -15   2   25.43    2.73
   0 -15   2   30.27    3.96
   0 -15   2   27.13    2.77
   0 -15  -2   23.11    2.36
   0 -15   3  844.88   17.86
   0 -15   3  837.12   17.52
   0 -15   3  784.37   17.29
   0 -15   3  826.04   21.02
   0 -15   3  823.10   17.64
   0 -15   4   43.87    3.60
   0 -15   4   41.99    3.51
   0 -15   4   39.88    3.53
   0 -15   4   43.54    4.38
   0 -15   4   39.73    3.56
   0 -15  -4   36.43    2.96
   0 -15   5  520.31   13.59
   0 -15   5  524.35   13.51
   0 -15   5  545.93   14.55
   0 -15   5  545.96   13.63
   0 -15   5  550.29   16.05
   0 -15   6   52.12    4.04
   0 -15   6   53.28    4.73
   0 -15   6   55.85    4.67
   0 -15  -6   51.99    3.56
   0 -15   7 2513.86   43.96
   0 -15   7 2572.98   44.18
   0 -15   7 2429.85   40.96
   0 -15  -7 2342.84   38.93
   0 -15   8   75.69    4.80
   0 -15   8   69.10    4.67
   0 -15   8   70.51    5.67
   0 -15   8   73.38    4.76
   0 -15  -8   72.34    4.42
   0 -15   9 1674.45   30.19
   0 -15   9 1706.23   30.59
   0 -15   9 1667.73   30.32
   0 -15   9 1750.73   34.71
   0 -15  -9 1677.23   29.61
   0 -15  10    4.87    1.60
   0 -15  10    4.47    1.79
   0 -15 -10    4.37    1.82
   0 -15  10    7.89    2.64
   0 -15  10    5.69    1.86
   0 -15  11 1334.70   24.81
   0 -15  11 1379.32   25.12
   0 -15  11 1337.92   28.26
   0 -15  11 1372.43   24.91
   0 -15 -11 1368.08   25.04
   0 -15  12   45.17    3.38
   0 -15  12   45.44    3.40
   0 -15  12   40.22    4.10
   0 -15  12   41.77    3.13
   0 -15 -12   43.98    3.42
   0 -15  13 1883.51   30.67
   0 -15  13 1872.08   29.86
   0 -15  13 1877.03   30.36
   0 -15 -13 1960.62   31.26
   0 -15  14    7.68    1.34
   0 -15 -14    8.00    1.72
   0 -15  14    4.79    1.55
   0 -15  14    7.57    1.72
   0 -15 -15 1632.34   25.87
   0 -15  15 1683.48   26.17
   0 -15 -16    6.85    1.27
   0 -16   0   39.38    3.18
   0 -16   0   37.27    2.97
   0 -16   0   42.42    3.51
   0 -16   0   44.18    4.72
   0 -16   0   41.22    3.14
   0 -16   1 3144.82   47.88
   0 -16  -1 3069.42   46.61
   0 -16   1 3007.91   46.87
   0 -16  -1 2919.32   46.29
   0 -16  -1 3073.45   48.69
   0 -16   1 3068.81   48.17
   0 -16   1 3150.66   55.20
   0 -16   1 3204.98   47.66
   0 -16  -1 3085.75   46.36
   0 -16   2    9.84    1.94
   0 -16   2    6.46    1.69
   0 -16   2   12.25    2.16
   0 -16   2    3.32    2.38
   0 -16   2    8.00    1.77
   0 -16  -2    5.41    1.49
   0 -16   3 3192.98   48.26
   0 -16   3 3193.77   47.76
   0 -16   3 2966.79   47.64
   0 -16   3 3199.84   54.72
   0 -16   3 3025.51   47.09
   0 -16   4   38.59    3.49
   0 -16   4   43.19    3.53
   0 -16   4   34.59    3.31
   0 -16   4   38.42    4.53
   0 -16   4   36.92    3.30
   0 -16  -4   30.67    2.75
   0 -16   5 2148.93   36.82
   0 -16   5 2126.48   36.65
   0 -16   5 2167.68   36.56
   0 -16   5 2219.61   37.11
   0 -16   6  338.86   10.81
   0 -16   6  333.30   10.35
   0 -16   6  329.87   10.43
   0 -16   7 2147.85   36.87
   0 -16   7 2117.30   35.79
   0 -16   8  297.74    9.71
   0 -16  -8  299.27    9.04
   0 -16   8  317.94   10.72
   0 -16   8  289.55    9.52
   0 -16   8  290.75    9.60
   0 -16   9 1534.49   27.59
   0 -16  -9 1476.63   26.66
   0 -16   9 1538.16   29.21
   0 -16   9 1506.18   27.58
   0 -16   9 1521.73   27.40
   0 -16  10    5.87    1.65
   0 -16  10    3.94    1.70
   0 -16  10    2.32    1.71
   0 -16  10    3.76    1.64
   0 -16 -10    5.36    1.76
   0 -16  11  688.31   14.69
   0 -16 -11  685.14   14.85
   0 -16  11  649.60   15.36
   0 -16  11  665.41   14.73
   0 -16  11  654.03   14.62
   0 -16  12    9.50    1.63
   0 -16  12   10.39    1.82
   0 -16  12    8.99    1.84
   0 -16  12    8.90    1.82
   0 -16 -12    9.62    1.91
   0 -16  13  157.13    5.21
   0 -16 -13  171.23    5.96
   0 -16  13  163.85    5.69
   0 -16  13  156.60    5.37
   0 -16 -14   47.92    3.00
   0 -16  14   42.44    2.54
   0 -16  14   50.46    3.06
   0 -16 -15   94.64    3.78
   0 -17   0    2.03    1.24
   0 -17   0    0.76    1.53
   0 -17   0    2.68    1.32
   0 -17   1   16.79    2.24
   0 -17  -1   12.73    1.90
   0 -17  -1   12.83    1.84
   0 -17   1   16.06    2.18
   0 -17  -1   16.04    2.66
   0 -17   1   15.39    2.48
   0 -17   2  160.91    6.69
   0 -17   2  168.09    7.01
   0 -17   2  164.24    6.55
   0 -17   3   87.09    4.95
   0 -17   3   85.81    5.02
   0 -17   3   88.15    4.84
   0 -17   3   88.22    4.61
   0 -17   4  114.99    5.78
   0 -17   4  106.57    5.56
   0 -17   4  110.39    5.49
   0 -17   4  107.46    5.16
   0 -17   5   46.19    3.73
   0 -17   5   45.40    3.50
   0 -17   5   57.45    4.01
   0 -17   5   51.56    3.91
   0 -17   6   60.85    4.03
   0 -17   6   59.48    4.10
   0 -17   6   56.16    4.14
   0 -17   7  500.19   12.55
   0 -17   7  485.21   12.64
   0 -17   8   67.19    4.19
   0 -17  -8   66.08    3.94
   0 -17   8   65.28    4.19
   0 -17   9  546.38   13.10
   0 -17  -9  534.35   12.52
   0 -17   9  503.99   12.40
   0 -17   9  531.96   13.03
   0 -17   9  550.44   13.02
   0 -17  10  369.29    9.91
   0 -17 -10  379.94    9.85
   0 -17  10  339.40    9.11
   0 -17  10  360.62    9.83
   0 -17  10  354.51    9.88
   0 -17  11  869.20   17.23
   0 -17  11  895.74   17.09
   0 -17  11  893.48   17.29
   0 -17 -11  912.76   17.46
   0 -17  12  139.35    5.18
   0 -17  12  138.03    5.03
   0 -17  12  141.11    5.28
   0 -17 -12  153.99    5.60
   0 -17  13 1265.31   21.18
   0 -17 -13 1316.11   21.46
   0 -17  14  229.27    5.70
   0 -17  14  255.87    6.68
   0 -18   0 1498.74   27.76
   0 -18   0 1409.68   25.06
   0 -18   0 1453.14   24.78
   0 -18   1 1126.82   22.43
   0 -18   1 1069.60   20.76
   0 -18   1 1110.62   20.54
   0 -18   2 1574.11   28.73
   0 -18   2 1563.65   27.78
   0 -18   2 1609.86   27.50
   0 -18   3  786.83   17.58
   0 -18   3  798.95   17.21
   0 -18   3  809.51   16.88
   0 -18   4 1067.28   21.56
   0 -18   4 1078.86   21.27
   0 -18   4 1079.42   20.87
   0 -18   5 1755.79   30.97
   0 -18   5 1768.12   30.84
   0 -18   5 1771.93   30.36
   0 -18   6  387.62   10.98
   0 -18   6  378.44   10.70
   0 -18   6  381.34   10.50
   0 -18   7  620.01   14.53
   0 -18   7  622.74   14.13
   0 -18   8  867.99   17.60
   0 -18   9  423.89   10.64
   0 -18  10  260.65    7.80
   0 -18  10  271.74    7.73
   0 -18  10  260.78    7.67
   0 -18  11  262.41    7.24
   0 -18 -11  270.24    7.53
   0 -18  11  266.27    7.47
   0 -18  11  271.73    7.48
   0 -18  12  292.53    7.31
   0 -18  12  281.09    7.09
   0 -18  12  288.55    7.45
   0 -18  13   74.33    3.04
   0 -18  13   76.62    3.42
   0 -19   0    2.66    1.15
   0 -19   0    2.44    1.17
   0 -19   1    5.00    1.36
   0 -19   1    4.46    1.39
   0 -19   2   85.25    5.05
   0 -19   2   79.63    4.28
   0 -19   2   78.15    4.04
   0 -19   3    3.70    1.40
   0 -19   3    4.43    1.84
   0 -19   3    4.74    1.47
   0 -19   4  175.40    7.05
   0 -19   4  177.91    6.60
   0 -19   4  172.10    6.31
   0 -19   5   37.37    3.31
   0 -19   5   36.47    3.03
   0 -19   5   40.30    3.07
   0 -19   6  156.51    6.37
   0 -19   6  151.67    5.99
   0 -19   6  149.20    5.79
   0 -19   7   58.50    3.83
   0 -19   7   53.41    3.40
   0 -19   8  321.22    9.04
   0 -19   8  309.42    8.43
   0 -19   9  276.93    7.69
   0 -19  10  879.93   16.46
   0 -19  10  891.80   16.15
   0 -19  10  886.91   16.18
   0 -19  11  294.05    7.38
   0 -19  11  281.45    7.04
   0 -19  11  291.16    7.28
   0 -19  12  822.97   14.41
   0 -19  12  859.15   14.83
   0 -20   1   76.92    3.85
   0 -20   1   75.06    3.43
   0 -20   2 1496.86   25.16
   0 -20   2 1478.11   24.20
   0 -20   3   22.37    2.26
   0 -20   3   19.62    2.06
   0 -20   4 2086.34   33.61
   0 -20   4 2060.50   32.87
   0 -20   5   54.14    3.82
   0 -20   5   50.64    3.24
   0 -20   5   50.61    3.09
   0 -20   6 1080.34   19.66
   0 -20   6 1068.45   19.15
   0 -20   7   10.08    1.63
   0 -20   7    9.99    1.60
   0 -20   7   10.81    2.00
   0 -20   8  716.50   13.89
   0 -20   8  773.06   15.10
   0 -20   9   64.23    3.16
   0 -20   9   66.25    3.22
   0 -21   2  237.55    8.22
   0 -21   2  196.87    5.30
   0 -21   3    3.39    1.05
   0 -21   4  336.04    7.72
   0 -21   4  332.27    8.40
   0 -21   5   13.00    1.55
   0 -21   5   13.65    1.71
   0 -21   6  550.82   10.91
   0 -21   6  572.04   11.56
   0 -21   7    8.34    1.26
   0 -21   8  801.43   13.89
   1   0 -21    4.69    1.25
   1   0 -20 1243.77   21.32
   1   0 -19    4.56    1.65
   1   0 -18 1368.24   24.81
   1   0 -17    4.69    1.94
   1   0 -16 1164.76   22.89
   1   0 -15    2.85    1.65
  -1   0  15    4.79    1.48
   1   0 -14  578.34   13.70
  -1   0  14  522.24   13.46
  -1   0  13    1.25    1.13
  -1   0  12  349.29    9.82
   1   0 -12  357.47   10.38
  -1   0  11    5.47    1.42
  -1   0  10  158.09    5.61
  -1   0   9    1.49    0.90
  -1   0   8  677.04   12.59
   1   0  -8  663.88   12.33
  -1   0   7    2.19    0.91
   1   0  -7    0.97    0.77
   1   0  -6   46.27    2.18
   1   0  -6   49.43    2.29
   1   0  -5    1.08    0.64
   1   0  -5    1.17    0.64
   1   0  -4   72.88    2.28
   1   0  -4   71.94    2.30
   1   0  -3    2.13    0.56
   1   0  -3    3.06    0.59
   1   0  -1   14.21    0.61
   1   0   1    1.49    0.25
   1   0   1    1.76    0.39
   1   0   1    1.84    0.41
   1   0   3    4.17    0.50
   1   0   5    1.39    0.61
   1   0   7    1.62    0.82
   1   0   7   15.43    1.29
   1   0   9    1.13    0.90
   1   0   9    2.80    0.96
   1   0  10 5078.95   70.74
  -1   0 -11    2.68    1.37
   1   0  11   14.02    1.68
  -1   0 -12 3894.93   58.24
   1   0  12 3976.93   57.32
  -1   0 -13    1.52    1.50
   1   0  13    3.93    1.45
   1   0  14 4575.13   69.72
  -1   0 -14 4611.20   68.44
   1   0  15    3.08    1.67
  -1   0 -15    1.51    1.65
  -1   0 -16 2324.32   38.98
  -1   0 -17    3.29    1.95
  -1   0 -18 1316.76   24.41
  -1   0 -19    0.80    1.40
  -1   0 -20  496.90   11.05
  -1   0 -21    1.62    1.02
   1   1 -21  111.64    4.08
   1   1 -20  547.50   11.71
   1   1 -19  120.70    5.18
   1   1 -18 1250.56   23.22
   1   1 -17  141.31    6.32
   1   1 -16 2685.06   43.32
   1   1 -15  283.12    9.12
  -1  -1  15  268.23    9.05
   1   1 -14 3169.73   48.44
  -1   1  14 3058.35   48.27
  -1  -1  14 3053.76   48.63
   1  -1 -13  442.51   11.58
   1  -1 -13  441.44   10.67
  -1  -1  13  438.94   11.71
  -1   1  13  419.02   11.47
   1   1 -12 5132.31   75.16
   1  -1 -12 5146.51   72.80
  -1  -1  12 5054.33   74.42
  -1   1  12 5262.80   74.20
   1  -1 -12 5136.26   74.14
  -1  -1  11 1001.64   19.19
  -1   1  11 1011.16   19.01
  -1  -1  10 5404.22   75.42
  -1   1  10 5307.53   75.08
  -1   1   9 1005.84   17.83
  -1  -1   9 1029.56   18.08
   1   1  -7 1220.08   19.07
  -1  -1   7 1183.40   19.33
   1   1  -5  386.71    7.30
   1   1  -5  397.89    7.26
  -1  -1   5  374.58    7.39
   1   1  -3  310.25    5.49
   1  -1  -3  309.42    5.51
   1   1  -3  310.71    5.46
   1   1  -1  428.04    5.82
   1  -1  -1  403.21    6.37
   1  -1   1    8.23    0.72
   1   1   1    6.62    0.53
   1   1   1    7.13    0.56
   1  -1   1    5.62    0.52
   1  -1   1    7.79    0.69
   1   1   3  513.88    7.47
   1  -1   3  499.95    7.91
   1  -1   3  502.75    8.25
   1  -1   4 1994.87   28.06
   1   1   4 2059.22   27.68
   1   1   5  209.12    4.85
   1  -1   5  207.36    4.49
   1   1   5  207.51    4.23
   1   1   6 2551.74   36.05
   1  -1   6 2475.63   35.36
   1   1   6 2534.10   35.04
   1   1   7  578.08   10.99
   1  -1   7  571.76   10.36
   1   1   7  584.20   10.16
   1   1   8  250.60    6.65
   1   1   8  248.18    5.91
   1  -1   8  249.92    6.17
   1   1   9  110.21    4.47
   1   1   9  110.11    3.95
   1  -1   9  116.53    4.17
   1  -1  10  415.46    9.44
   1   1  10  413.89    9.06
   1  -1  11    2.34    1.04
   1   1  11    4.35    1.17
  -1   1 -11    2.06    1.24
   1  -1  12  333.50    9.94
   1   1  12  315.24    8.41
   1  -1  12  334.07    9.01
  -1   1 -12  327.94    9.38
   1  -1  13    9.99    1.71
   1  -1  13   11.81    2.15
  -1   1 -13   10.72    2.08
  -1   1 -14 1107.41   22.03
   1   1  14 1146.40   22.98
   1  -1  14 1076.45   22.78
   1   1  15  114.83    6.33
   1  -1  15  114.81    6.33
  -1   1 -15  124.88    6.14
  -1   1 -16  700.01   16.48
  -1   1 -17  319.93   10.04
  -1   1 -18 1156.54   22.20
  -1   1 -19  105.15    4.96
  -1   1 -20 1005.25   18.14
  -1   1 -21  181.58    5.13
   1   2 -21  234.20    6.13
   1  -2 -21  235.33    6.16
   1  -2 -20 1108.04   19.40
   1   2 -20 1113.62   19.41
   1   2 -19  385.50    9.90
   1  -2 -19  379.97    9.87
   1   2 -18  682.11   15.08
   1   2 -17  202.69    7.57
   1  -2 -16 1411.59   24.91
   1   2 -16 1473.06   26.65
   1  -2 -16 1427.07   26.40
  -1  -2  15  287.29   10.11
   1  -2 -15  303.18    8.89
  -1   2  15  269.66    9.03
  -1  -2  15  288.90    9.66
   1  -2 -15  321.67    9.78
   1   2 -15  318.09    9.76
   1  -2 -14  410.80   10.59
   1   2 -14  415.02   11.25
   1  -2 -14  418.44   11.26
  -1  -2  14  406.40   11.48
   1  -2 -13  266.88    8.05
   1   2 -13  258.99    8.32
   1  -2 -13  261.85    8.31
  -1   2  13  258.07    8.35
  -1  -2  13  247.42    8.53
   1  -2 -13  270.64    8.85
   1   2 -12   34.03    3.16
   1  -2 -12   34.09    2.74
   1  -2 -12   31.73    2.90
  -1   2  12   36.79    2.95
  -1  -2  12   32.90    2.91
  -1  -2  11  111.12    5.04
  -1   2  11  103.09    4.71
  -1  -2  10    6.10    1.34
  -1   2  10    4.83    1.26
  -1   2   9  184.76    5.77
  -1  -2   9  179.91    5.84
  -1  -2   8  441.23    9.67
   1   2  -8  448.70    9.31
  -1  -2   7   40.89    2.31
   1   2  -7   28.86    1.88
   1   2  -6  128.92    3.82
   1  -2  -6  133.19    3.84
  -1  -2   6  114.54    3.80
   1  -2  -6  122.02    3.64
   1   2  -6  123.25    3.69
   1  -2  -5  649.84   10.77
   1   2  -5  651.92   10.82
  -1  -2   5  627.93   11.03
   1  -2  -5  635.77   10.64
   1   2  -5  652.04   10.73
   1   2  -3   14.52    0.96
   1  -2  -3   15.38    0.97
   1  -2  -3   15.20    1.04
   1   2  -3   14.77    0.96
   1  -2  -3   14.16    0.94
   1  -2  -2   34.85    1.34
   1  -2   0  512.21    8.02
  -1   2   0  535.32    8.64
   1  -2   5 2891.67   41.27
   1   2   5 3026.60   41.30
   1  -2   5 2992.81   41.44
   1   2   7 4747.99   64.82
   1  -2   7 4829.64   66.19
   1   2   7 4819.62   66.15
   1   2   8 5766.08   77.87
   1   2   8 5724.87   79.39
   1  -2   9 1292.89   21.04
   1   2   9 1274.00   20.21
   1   2   9 1263.68   21.66
   1  -2   9 1240.26   21.79
   1  -2  10 4448.22   61.37
   1  -2  10 4430.76   62.63
   1  -2  11 1895.40   29.88
   1   2  11 1800.90   28.50
   1  -2  11 1812.63   31.14
  -1   2 -11 1821.50   29.87
  -1   2 -12 2414.72   38.80
   1  -2  12 2503.89   40.20
   1  -2  12 2512.24   38.70
  -1  -2 -12 2384.50   37.98
  -1   2 -13 1167.65   22.38
  -1  -2 -13 1183.40   22.38
   1  -2  13 1200.27   23.52
   1  -2  13 1133.04   21.78
  -1  -2 -13 1172.94   21.56
   1  -2  14 2691.97   44.58
  -1   2 -14 2693.64   43.19
  -1  -2 -14 2700.57   43.12
   1   2  14 2755.81   44.27
   1  -2  14 2546.07   42.06
  -1  -2 -14 2677.19   41.97
   1   2  15  261.78    9.61
   1  -2  15  247.67    9.56
  -1  -2 -15  259.15    9.03
  -1   2 -15  277.79    9.29
  -1   2 -16 1969.87   33.73
  -1  -2 -16 1864.55   33.18
  -1   2 -17  183.91    7.36
  -1   2 -18 1070.51   20.98
  -1  -2 -19  290.31    8.56
  -1   2 -19  311.23    8.79
  -1  -2 -20  380.59    9.20
  -1   2 -20  389.97    9.30
  -1   2 -21   98.30    3.53
  -1  -2 -21   92.60    3.46
   1   3 -21  290.06    6.88
   1  -3 -21  297.05    6.93
   1  -3 -20  392.17    9.18
   1   3 -20  387.06    9.11
   1  -3 -19  536.67   12.05
   1   3 -19  524.08   11.92
   1  -3 -18  478.60   11.83
   1   3 -18  477.29   11.84
   1  -3 -17 1173.91   21.38
   1  -3 -17 1218.19   22.88
   1   3 -17 1196.79   22.78
   1  -3 -16  333.36    9.49
   1  -3 -16  336.20   10.14
   1   3 -16  341.38   10.22
  -1  -3  15 1392.09   27.68
  -1  -3  15 1446.19   28.66
   1  -3 -15 1519.75   26.53
   1  -3 -15 1543.60   27.38
   1   3 -15 1559.98   27.51
  -1  -3  14  799.88   18.28
   1  -3 -14  836.32   17.51
   1   3 -14  842.41   17.62
  -1  -3  14  795.12   17.92
  -1   3  14  775.29   17.02
   1  -3 -14  837.77   17.12
  -1  -3  13 2995.28   48.05
   1   3 -13 3055.58   46.97
   1  -3 -13 3062.20   46.91
   1  -3 -13 3081.59   46.71
  -1  -3  13 3031.35   47.87
  -1   3  13 3002.42   46.99
   1  -3 -13 3040.88   48.12
   1  -3 -12 1094.07   20.32
   1  -3 -12 1092.39   21.36
  -1   3  12 1106.81   20.61
  -1  -3  12 1096.37   21.22
  -1   3  11 4060.92   59.21
  -1  -3  11 4099.69   60.03
  -1   3  10 3277.75   48.85
  -1  -3  10 3369.16   49.43
  -1  -3   9 1481.30   24.66
  -1  -3   8 2717.43   40.08
   1   3  -7 4685.99   64.08
   1  -3  -7 4646.70   64.02
   1   3  -6 3036.23   41.93
   1  -3  -6 2986.93   41.86
  -1  -3   6 2873.64   42.30
   1   3  -6 2974.75   41.67
   1  -3  -6 3017.99   41.69
   1  -3  -2 1096.05   15.19
   1   3  -2 1083.35   15.22
  -1  -3   2 1065.04   15.64
   1   3  -2 1069.91   15.21
   1  -3  -2 1082.51   15.19
   1  -3  -1 1078.43   16.21
  -1  -3   1 1059.04   14.67
   1  -3   0 1537.47   22.04
  -1   3   0 1589.71   22.94
   1   3   1 1467.48   19.85
  -1  -3  -1 1378.87   19.69
   1  -3   1 1430.13   20.37
   1  -3   1 1459.62   19.82
   1   3   1 1451.73   19.84
   1  -3   1 1446.78   19.81
   1  -3   3 2517.68   34.79
   1  -3   4 2255.74   31.73
   1  -3   5  898.22   14.43
   1   3   5  898.37   14.26
   1  -3   5  884.05   14.27
   1  -3   6  169.67    4.58
   1   3   6  160.97    3.79
   1  -3   6  155.65    4.44
   1   3   6  161.90    4.48
   1   3   7   29.71    1.62
   1   3   7   28.30    1.95
   1  -3   7   25.42    1.88
   1   3   8    1.96    0.73
   1  -3   8    6.62    1.18
   1   3   9   40.84    2.71
   1  -3   9   44.34    2.73
   1   3   9   39.95    2.20
   1   3  10   29.59    2.03
   1  -3  10   29.50    2.42
   1  -3  11   37.78    2.83
  -1  -3 -11   35.66    2.78
  -1   3 -11   36.57    2.90
   1  -3  12  455.73   11.20
  -1  -3 -12  422.78   10.79
  -1   3 -12  426.30   11.02
   1  -3  13  344.83   10.02
  -1  -3 -13  363.14    9.96
  -1  -3 -13  363.75   10.31
  -1   3 -13  354.98   10.25
   1  -3  14   19.88    2.44
  -1  -3 -14   19.57    2.46
  -1   3 -14   21.96    2.79
  -1  -3 -14   24.95    2.90
  -1  -3 -15 1046.13   21.27
  -1   3 -15 1043.64   21.28
  -1  -3 -15 1030.93   20.30
   1   3  15 1029.38   21.83
  -1   3 -16   17.03    2.65
  -1  -3 -16   15.32    2.21
  -1  -3 -16   16.35    2.61
  -1  -3 -17  695.25   15.85
  -1   3 -17  685.48   15.86
  -1  -3 -18  368.22   10.34
  -1   3 -18  375.72   10.42
  -1   3 -19  730.76   15.09
  -1  -3 -19  727.26   14.99
  -1  -3 -20  411.98    9.46
  -1   3 -20  408.98    9.45
   1  -4 -20   27.09    2.30
   1   4 -20   31.01    2.33
   1  -4 -19  712.39   14.46
   1   4 -19  715.76   14.41
   1  -4 -18  230.32    7.53
   1   4 -18  234.83    7.59
   1  -4 -18  213.70    6.64
   1   4 -17  773.17   16.58
   1  -4 -17  783.69   16.64
   1  -4 -17  751.78   15.70
   1  -4 -16  597.67   14.28
   1   4 -16  612.38   14.39
   1  -4 -16  587.50   13.73
  -1  -4  15  614.49   15.86
  -1  -4  15  629.81   16.64
   1   4 -15  691.12   15.51
   1  -4 -15  673.67   15.32
   1  -4 -15  688.08   15.17
  -1  -4  14  180.58    7.45
  -1  -4  14  171.72    7.63
   1  -4 -14  185.43    6.99
   1   4 -14  185.25    7.10
   1  -4 -14  178.96    6.98
  -1  -4  13  368.44   11.00
   1  -4 -13  365.71   10.06
   1   4 -13  372.39   10.16
  -1   4  13  337.48    9.90
  -1  -4  13  343.28   10.58
   1  -4 -13  365.24   10.12
  -1  -4  12   81.79    4.67
   1  -4 -12   78.32    4.29
  -1  -4  12   79.55    4.57
  -1   4  12   84.31    4.32
   1  -4 -12   80.07    4.76
   1  -4 -11  143.62    6.07
  -1  -4  11  142.86    5.79
   1  -4 -11  142.27    5.55
   1   4 -11  138.62    5.86
  -1  -4  11  138.05    5.83
  -1   4  11  137.82    5.44
  -1  -4  10   14.78    1.90
  -1  -4   9   14.59    1.82
  -1  -4   8  154.92    5.22
   1   4  -7  606.81   11.07
   1  -4  -7  602.62   11.02
  -1  -4   7  626.39   11.89
   1  -4  -6    4.80    0.86
   1   4  -6    4.75    0.87
  -1  -4   6    5.45    1.09
   1  -4  -5 3989.46   53.79
   1   4  -5 3953.44   53.80
   1   4  -5 3904.58   53.66
   1   4  -4  175.67    3.95
   1  -4  -4  177.55    3.95
   1   4  -4  173.66    3.91
   1  -4  -4  175.43    3.91
  -1  -4   3 2300.70   31.89
   1   4  -3 2343.92   31.79
   1  -4  -3 2347.57   31.78
   1   4  -2  584.69    8.75
   1  -4  -2  590.72    8.73
  -1  -4   2  575.98    8.99
   1  -4  -2  577.81    8.71
   1   4  -2  587.09    8.72
  -1  -4   2  585.12    9.46
  -1  -4   1 1617.79   22.63
  -1  -4   0  929.65   13.37
   1  -4   0  902.15   14.14
   1   4   0  919.70   12.55
  -1   4   0  939.84   15.17
   1  -4   4 1298.80   20.04
   1   4   4 1354.46   19.46
   1  -4   4 1321.60   19.48
   1   4   5 4158.22   56.67
   1  -4   6  168.10    4.82
   1   4   6  161.56    4.50
   1  -4   6  167.23    4.60
   1   4   7 4966.21   66.36
   1   4   7 4859.19   67.68
   1  -4   7 4870.81   67.75
   1  -4   8  257.22    6.79
   1   4   8  245.15    5.63
   1   4   8  236.62    6.55
   1   4   9 5158.58   72.75
   1   4   9 5337.98   74.72
   1  -4  10  926.49   17.63
  -1  -4 -11 4230.51   61.94
  -1   4 -11 4209.33   61.77
   1  -4  11 4362.04   62.60
   1  -4  12  666.42   15.63
  -1  -4 -12  652.09   14.46
  -1  -4 -12  675.25   14.66
  -1   4 -12  649.92   14.53
   1  -4  12  672.70   14.97
   1  -4  13 2549.83   42.66
  -1  -4 -13 2554.09   40.88
   1  -4  13 2675.48   41.55
  -1   4 -13 2536.84   41.07
  -1  -4 -13 2532.60   41.07
  -1  -4 -14  450.99   11.99
  -1   4 -14  432.78   11.82
  -1  -4 -14  436.07   11.60
   1  -4  14  419.27   11.74
   1  -4  14  427.17   12.76
  -1  -4 -15 3060.91   48.25
  -1   4 -15 3123.55   48.44
   1   4  15 3044.77   48.98
  -1  -4 -15 3107.48   47.71
  -1  -4 -16   19.33    2.51
  -1  -4 -16   20.17    2.67
  -1   4 -16   21.58    2.80
  -1  -4 -17 1182.38   21.92
  -1   4 -17 1252.55   23.48
  -1  -4 -17 1241.53   23.35
  -1  -4 -18  327.08    9.48
  -1   4 -18  341.79    9.70
  -1  -4 -19  512.95   11.63
  -1   4 -19  506.33   11.59
  -1  -4 -20   44.66    2.78
  -1   4 -20   47.12    2.81
   1  -5 -20    3.05    1.24
   1   5 -20    3.68    1.24
   1  -5 -19 1224.40   20.82
   1   5 -19 1210.98   20.66
   1  -5 -18   41.85    2.95
   1  -5 -18   44.34    3.20
   1   5 -18   41.67    3.14
   1  -5 -17 1086.37   20.62
   1  -5 -17 1123.24   21.14
   1   5 -17 1118.47   21.10
   1  -5 -16    6.27    1.79
   1  -5 -16    5.22    1.74
   1   5 -16    6.78    1.85
   1  -5 -15 1067.84   21.05
   1   5 -15 1092.78   21.15
   1  -5 -15 1069.56   21.03
  -1  -5  15 1038.73   23.12
   1   5 -14  237.01    8.03
   1  -5 -14  233.21    7.96
   1  -5 -14  229.72    8.06
  -1  -5  14  219.99    8.89
  -1  -5  14  231.47    8.69
   1   5 -13 3217.68   48.72
   1  -5 -13 3208.47   48.71
  -1   5  13 3033.51   48.27
  -1  -5  13 3205.56   50.50
  -1  -5  13 3171.65   50.59
   1  -5 -13 3245.40   49.25
   1  -5 -12   40.75    3.22
  -1   5  12   31.76    2.78
  -1  -5  12   37.68    3.24
   1   5 -12   42.14    3.10
  -1  -5  12   41.81    3.51
  -1  -5  12   40.09    3.31
   1  -5 -12   34.67    3.35
   1  -5 -11 4481.80   67.93
  -1  -5  11 4582.04   67.47
  -1  -5  11 4657.29   67.63
  -1   5  11 4484.90   66.24
   1  -5 -11 4562.75   66.64
  -1  -5  10   17.01    2.07
  -1  -5  10    6.44    1.48
  -1  -5   9 5497.32   78.23
  -1  -5   9 5618.32   78.50
  -1  -5   8  102.70    4.17
  -1  -5   8  105.94    4.36
   1   5  -6    8.26    1.02
   1  -5  -6    7.10    0.97
  -1  -5   4  147.54    3.85
   1  -5  -4  139.26    4.02
   1  -5  -4  150.65    3.52
   1   5  -4  149.74    3.51
   1  -5  -4  144.37    3.45
   1   5  -4  144.71    3.43
  -1  -5   2  720.84   11.48
   1  -5  -2  689.30   11.57
  -1  -5   2  703.84   11.58
   1   5  -2  717.27   10.40
   1  -5  -2  719.75   10.41
   1  -5  -2  726.26   10.44
  -1  -5   2  704.71   11.39
   1   5  -2  735.73   10.46
  -1  -5   0    5.68    0.47
   1  -5   0    4.82    1.02
  -1   5   0    8.87    1.46
   1  -5   1 1170.96   19.70
   1  -5   1 1185.60   18.55
  -1  -5  -1 1158.86   18.20
   1  -5   2  926.85   13.41
   1   5   2  919.67   13.38
  -1  -5  -2  932.30   14.34
   1  -5   2  936.05   14.73
   1  -5   2  926.92   15.98
   1  -5   2  926.69   13.39
   1   5   2  916.44   13.37
   1  -5   2  960.78   16.09
   1  -5   3  354.43    6.17
   1   5   3  354.24    6.13
   1  -5   3  338.25    7.66
   1  -5   3  349.75    7.10
   1  -5   3  353.24    7.81
   1   5   4 1036.94   15.27
   1  -5   4  997.14   15.27
   1  -5   4 1000.25   16.77
   1  -5   4 1030.45   16.28
   1  -5   5 1848.28   28.34
   1   5   5 1886.22   27.00
   1  -5   5 1799.98   28.21
   1  -5   5 1882.87   27.09
   1  -5   5 1905.68   28.00
   1  -5   6 1105.69   19.23
   1  -5   6 1152.52   18.31
   1   5   6 1149.93   18.21
   1  -5   7  201.68    5.98
   1   5   7  178.79    5.15
   1  -5   7  178.52    5.21
   1  -5   7  193.43    5.70
   1  -5   8  568.88   12.19
   1   5   8  560.49   11.42
   1   5   8  572.13   10.22
   1  -5   8  577.61   11.97
   1  -5   9   73.43    3.98
   1  -5   9   72.16    3.80
   1  -5  10  122.76    5.15
   1  -5  10  119.83    5.37
  -1  -5 -10  111.75    4.88
  -1   5 -11    5.46    1.53
   1  -5  11    6.77    1.59
   1  -5  11    5.86    1.52
  -1  -5 -11    6.78    1.62
  -1   5 -12   72.05    4.14
  -1  -5 -12   69.66    4.14
   1  -5  12   78.73    4.55
  -1  -5 -12   70.95    4.21
   1  -5  12   74.80    4.76
  -1   5 -13  685.98   15.49
  -1  -5 -13  703.09   15.62
   1  -5  13  715.21   16.13
  -1  -5 -13  699.00   15.72
   1  -5  13  676.17   16.70
  -1  -5 -14   46.39    3.72
  -1   5 -14   48.34    3.77
   1  -5  14   44.89    3.59
  -1  -5 -14   48.00    3.78
   1  -5  14   43.43    4.02
  -1   5 -15  264.12    9.00
  -1  -5 -15  276.13    9.17
  -1  -5 -15  273.23    8.97
  -1  -5 -16   14.61    2.28
  -1  -5 -16   18.63    2.60
  -1   5 -16   21.11    2.77
  -1   5 -17 1084.26   21.01
  -1  -5 -17 1080.11   20.96
  -1  -5 -17 1054.98   20.11
  -1  -5 -18    4.26    1.39
  -1   5 -18    3.55    1.57
  -1  -5 -18    5.83    1.83
  -1   5 -19 1092.89   19.48
  -1  -5 -19 1096.15   19.53
  -1  -5 -20    3.54    1.17
  -1   5 -20    1.64    1.10
   1   6 -20   59.97    2.88
   1  -6 -20   55.75    2.78
   1  -6 -19  512.63   10.64
   1  -6 -19  534.88   11.29
   1   6 -19  533.68   11.18
   1  -6 -18   83.00    4.07
   1  -6 -18   89.92    4.33
   1   6 -18   82.97    4.14
   1  -6 -17  919.65   18.30
   1  -6 -17  944.67   18.40
   1   6 -17  944.80   18.30
   1  -6 -16   36.78    3.23
   1   6 -16   33.82    3.05
   1  -6 -16   34.90    3.11
   1  -6 -15  351.60   10.33
   1   6 -15  349.60   10.01
   1  -6 -15  339.26    9.93
  -1  -6  14   91.82    5.44
  -1  -6  14   87.95    5.73
   1  -6 -14   91.86    5.06
   1  -6 -14   88.27    4.75
   1   6 -14   94.32    4.90
   1   6 -13  139.70    5.82
   1  -6 -13  138.51    5.87
  -1  -6  13  134.98    6.44
  -1  -6  13  134.27    6.76
   1  -6 -13  136.26    6.13
  -1  -6  13  144.61    6.31
   1   6 -12   18.76    2.24
   1  -6 -12   19.85    2.35
  -1  -6  12   20.16    2.60
  -1  -6  12   20.62    2.57
  -1   6  12   17.44    2.16
   1  -6 -12   22.40    2.59
  -1  -6  12   20.37    2.59
   1  -6 -11  378.40   11.01
   1   6 -11  359.42    9.31
  -1   6  11  349.58    9.48
  -1  -6  11  361.77   10.56
  -1  -6  11  376.08   10.71
   1  -6 -11  372.45   10.14
   1  -6 -10   35.69    2.88
  -1  -6  10   34.35    2.94
   1  -6 -10   36.91    3.21
  -1  -6  10   36.29    3.03
  -1  -6   9   98.89    4.67
  -1  -6   9  105.07    4.72
  -1  -6   8  136.11    5.28
  -1  -6   8  148.67    5.36
  -1  -6   7  682.77   13.33
  -1  -6   6   93.55    3.74
   1  -6  -5 1626.94   24.72
  -1  -6   5 1613.29   24.84
  -1  -6   4   90.34    3.32
  -1  -6   4   92.70    3.31
   1  -6  -4   88.94    2.51
   1   6  -4   87.68    2.48
  -1  -6   4   92.88    3.38
   1  -6  -4   84.89    3.12
   1  -6  -3 1573.81   24.45
  -1  -6   3 1697.43   24.90
  -1  -6   3 1637.36   24.91
   1  -6  -3 1761.63   23.24
  -1  -6   3 1610.56   24.80
   1   6  -3 1710.35   23.22
   1  -6  -3 1677.52   23.10
   1   6  -3 1641.53   23.08
   1  -6  -3 1610.26   26.94
  -1  -6   2   64.03    2.18
   1  -6  -2   68.29    2.53
   1   6  -2   58.79    1.53
   1  -6  -2   59.16    1.53
   1  -6  -2   58.73    1.51
   1   6  -2   57.57    1.50
   1  -6  -2   52.37    3.15
  -1  -6   2   65.42    2.51
   1  -6  -1  556.49   10.13
  -1  -6   1  558.29    8.63
   1  -6  -1  594.76    8.17
  -1   6   1  552.83   11.48
   1   6  -1  589.52    8.20
   1   6  -1  578.50    8.16
   1  -6  -1  600.65    8.17
  -1  -6   1  562.15   10.01
  -1  -6   0  738.25   12.31
  -1   6   0  706.16   13.80
   1  -6   0  723.79   12.87
  -1  -6  -1 4392.62   59.74
   1  -6   1 4337.80   60.96
   1  -6   2   11.61    1.69
   1  -6   2   10.79    0.69
   1   6   2   10.62    0.88
   1   6   2    9.98    0.66
   1  -6   2   11.69    0.91
   1   6   2   11.87    0.91
   1  -6   2   11.91    0.90
  -1  -6  -2    9.43    1.22
   1  -6   2   12.80    1.33
   1  -6   3 4270.03   61.26
   1  -6   3 4416.26   61.46
   1  -6   4   26.33    1.88
   1  -6   4   23.17    1.33
   1   6   4   22.20    1.29
   1  -6   4   27.34    2.14
   1  -6   4   28.80    2.21
   1  -6   5 6460.54   88.78
   1  -6   6  240.49    6.50
   1   6   6  236.85    5.67
   1  -6   6  238.37    5.77
   1  -6   6  231.84    6.79
   1  -6   7 4696.59   67.61
   1   6   7 4635.70   65.71
   1  -6   7 4795.68   65.92
   1  -6   8 1097.98   19.57
   1  -6   8 1074.19   19.88
   1   6   8 1061.69   18.39
   1  -6   9 5379.16   75.84
   1  -6   9 5264.79   76.45
   1  -6  10  291.38    9.12
   1  -6  10  278.13    8.14
  -1  -6 -10  280.50    8.31
   1  -6  10  295.48    8.80
   1  -6  11 4955.26   71.77
  -1  -6 -11 5000.32   72.34
   1  -6  11 5130.24   73.17
  -1   6 -11 4952.45   71.43
   1  -6  11 4976.08   73.94
   1  -6  12  380.88   10.49
   1  -6  12  396.87   11.95
  -1  -6 -12  409.02   10.71
  -1   6 -12  407.22   10.63
   1  -6  12  409.87   11.35
  -1  -6 -12  406.44   11.04
   1  -6  13 2738.24   46.86
  -1  -6 -13 2865.28   44.84
  -1   6 -13 2847.27   44.71
   1  -6  13 2924.71   45.91
  -1  -6 -13 2844.83   45.28
   1  -6  14  578.62   15.99
   1  -6  14  604.24   14.94
  -1  -6 -14  625.89   14.60
  -1   6 -14  617.63   14.48
  -1  -6 -14  593.41   14.60
  -1   6 -15 2203.58   36.66
  -1  -6 -15 2218.38   36.78
  -1  -6 -15 2209.62   37.01
  -1   6 -16  258.15    8.56
  -1  -6 -16  271.94    8.77
  -1  -6 -16  258.90    8.58
  -1   6 -17  730.65   15.66
  -1  -6 -17  717.91   15.60
  -1  -6 -17  714.72   15.26
  -1   6 -18    6.08    1.73
  -1  -6 -18    5.67    1.68
  -1  -6 -18    8.65    1.62
  -1   6 -19  678.79   13.22
  -1  -6 -19  703.95   13.42
   1  -7 -19  367.36    8.56
   1   7 -19  386.49    8.60
   1  -7 -19  369.03    8.45
   1   7 -18  383.42    9.33
   1  -7 -18  396.06    9.53
   1  -7 -18  394.80    9.64
   1   7 -17 1946.55   31.64
   1  -7 -17 1991.68   31.87
   1  -7 -17 1964.66   32.35
   1   7 -16  305.17    8.87
   1  -7 -16  314.70    9.06
   1  -7 -16  310.00    9.45
   1   7 -15 1341.74   24.19
   1  -7 -15 1365.00   24.46
   1  -7 -15 1334.68   25.18
   1  -7 -14  553.24   13.84
  -1  -7  14  551.18   16.10
   1   7 -14  537.34   12.87
   1  -7 -14  544.69   12.99
  -1  -7  14  512.24   14.26
   1  -7 -13 1698.38   30.01
  -1  -7  13 1693.55   32.50
   1   7 -13 1644.92   28.50
   1  -7 -13 1682.53   28.75
  -1  -7  13 1680.74   31.01
  -1  -7  13 1762.51   30.19
   1  -7 -12  669.26   15.32
   1   7 -12  641.47   14.04
   1  -7 -12  669.86   14.29
  -1  -7  12  663.73   15.97
  -1  -7  12  697.55   15.86
  -1  -7  12  675.56   16.94
   1  -7 -11 2049.25   35.62
  -1  -7  11 2126.58   36.27
  -1  -7  11 2009.06   33.01
  -1  -7  11 2113.90   35.30
  -1  -7  11 2121.00   35.47
   1  -7 -11 2074.29   34.31
   1  -7 -10 1942.49   34.04
  -1  -7  10 2067.85   34.51
  -1  -7  10 2038.45   33.89
  -1  -7  10 1957.58   31.99
  -1  -7  10 2110.41   34.14
   1  -7 -10 1998.25   32.93
  -1  -7   9 2710.94   43.25
  -1  -7   9 2878.86   44.19
  -1  -7   8 1477.82   25.72
  -1  -7   7 5634.66   79.49
  -1  -7   6  804.88   15.69
  -1  -7   6  864.84   15.96
  -1  -7   5 3299.84   48.69
   1  -7  -5 3417.46   47.97
  -1  -7   5 3397.64   48.50
  -1  -7   5 3384.49   48.98
  -1  -7   4 1347.49   22.12
  -1  -7   4 1384.43   22.35
   1  -7  -4 1389.88   21.39
  -1  -7   4 1371.02   21.85
  -1  -7   3 4186.49   56.75
  -1  -7   3 4193.11   56.72
   1  -7  -2 2078.87   30.46
  -1  -7   2 2126.46   29.32
   1  -7  -2 2085.00   33.31
  -1  -7   2 2127.65   30.85
  -1  -7   1 2686.30   36.25
   1  -7  -1 2671.27   38.21
  -1   7   1 2775.60   40.56
   1  -7  -1 2710.17   39.85
  -1  -7   1 2678.95   38.36
  -1  -7   0  866.16   14.64
   1  -7   0  870.37   14.82
  -1  -7   0  906.46   12.73
  -1  -7  -1 1866.07   29.42
   1   7   1 1952.67   28.08
   1  -7   1 1937.67   30.15
   1  -7   2  666.43   13.57
  -1  -7  -2  654.95   12.39
   1  -7   2  697.95    9.89
   1   7   2  690.77    9.84
   1   7   3 1367.49   20.04
   1  -7   3 1408.10   20.08
   1  -7   3 1371.69   23.88
   1  -7   3 1473.99   19.83
   1   7   3 1425.05   19.73
   1  -7   3 1385.45   23.86
   1   7   3 1378.89   20.06
   1  -7   3 1370.33   20.04
   1  -7   3 1433.04   22.27
   1  -7   4  212.10    4.42
   1  -7   4  189.04    6.37
   1   7   4  200.46    4.29
   1  -7   4  192.34    6.42
   1   7   4  193.63    4.26
   1  -7   4  192.11    4.26
   1  -7   4  198.89    5.65
   1   7   5  849.03   13.87
   1  -7   5  889.07   14.05
   1  -7   5  876.61   16.74
   1  -7   5  884.93   15.71
   1   7   6   67.07    2.69
   1  -7   6   69.81    2.80
   1  -7   6   55.22    3.43
   1  -7   6   56.93    3.13
   1   7   7  618.73   11.70
   1  -7   7  623.10   11.88
   1  -7   7  621.90   13.75
   1  -7   8  428.59   10.53
   1  -7   8  434.92   11.16
   1  -7   9  361.25    9.65
   1  -7   9  343.34   10.13
   1  -7  10   20.35    2.59
   1  -7  10   14.28    1.93
   1  -7  10   13.21    1.97
  -1  -7 -10   13.37    2.08
   1  -7  10   13.92    1.95
  -1   7 -11  538.56   12.26
   1  -7  11  530.12   14.20
   1  -7  11  543.71   12.42
   1  -7  11  537.46   13.52
  -1  -7 -11  529.12   12.98
   1  -7  11  535.24   12.71
   1  -7  12   66.02    4.79
   1  -7  12   67.40    4.18
   1  -7  12   73.98    4.56
  -1   7 -12   69.08    4.10
  -1  -7 -12   71.09    4.20
  -1  -7 -12   71.36    4.42
   1  -7  13  421.47   13.14
   1  -7  13  432.73   11.60
  -1  -7 -13  446.26   12.19
  -1  -7 -13  450.57   11.66
  -1   7 -13  441.64   11.47
   1  -7  13  430.73   12.37
  -1   7 -14   44.56    3.53
  -1  -7 -14   42.71    3.50
  -1  -7 -14   41.08    3.63
   1  -7  14   36.98    3.94
  -1   7 -15  245.08    8.27
  -1  -7 -15  261.67    8.54
  -1  -7 -15  254.74    8.77
  -1   7 -16  145.49    6.10
  -1  -7 -16  143.80    6.12
  -1  -7 -16  148.78    6.34
  -1   7 -17 1153.52   21.26
  -1  -7 -17 1166.37   21.45
  -1  -7 -17 1168.57   21.51
  -1  -7 -18  325.61    8.59
  -1   7 -18  323.35    8.47
  -1  -7 -18  325.65    8.44
  -1  -7 -19  744.87   13.28
  -1   7 -19  725.46   13.21
  -1  -7 -19  723.70   13.31
   1  -8 -19  275.83    6.92
   1  -8 -18 1067.83   18.48
   1  -8 -18 1064.62   19.10
   1  -8 -17  312.46    8.34
   1   8 -17  304.61    8.16
   1  -8 -17  310.02    8.92
   1   8 -16  762.03   15.47
   1  -8 -16  782.96   15.74
   1  -8 -16  778.42   16.67
  -1  -8  15  275.37    8.39
   1  -8 -15  269.45    8.23
   1   8 -15  264.40    8.06
   1  -8 -15  274.32    9.07
   1   8 -14  123.67    5.36
   1  -8 -14  127.03    5.50
  -1  -8  14  114.76    7.39
  -1  -8  14  129.42    5.90
   1  -8 -14  131.90    6.19
   1  -8 -13   79.21    4.28
  -1  -8  13   81.69    6.09
  -1  -8  13   78.51    5.07
  -1  -8  13   80.31    4.82
   1  -8 -13   79.95    4.83
   1  -8 -12  137.70    6.25
   1  -8 -12  135.79    5.46
  -1  -8  12  124.49    6.37
  -1  -8  12  141.55    6.44
  -1  -8  12  129.25    5.54
  -1  -8  11  102.35    4.84
  -1  -8  11  111.03    6.48
  -1  -8  11  105.23    5.60
  -1  -8  11  111.78    5.62
   1  -8 -11  101.07    5.22
  -1  -8  10    5.94    1.43
  -1  -8  10    9.68    2.01
   1  -8 -10    6.47    1.72
  -1  -8  10    4.04    1.74
  -1  -8   9    1.92    1.42
  -1  -8   9    4.67    1.56
  -1  -8   9    2.49    1.25
  -1  -8   8  117.76    5.86
  -1  -8   7   93.22    4.94
  -1  -8   6   20.91    2.41
  -1  -8   6   21.46    2.34
  -1  -8   6   20.45    2.05
  -1  -8   5  662.81   13.77
  -1  -8   5  642.87   12.90
   1  -8  -5  638.98   12.25
  -1  -8   5  636.10   13.56
  -1  -8   4  502.32   10.57
  -1  -8   4  524.45   10.73
  -1  -8   4  523.52   10.71
   1  -8  -3  886.15   15.16
  -1  -8   3  915.52   15.91
   1  -8  -3  890.50   18.06
  -1  -8   3  938.82   14.75
  -1  -8   2  745.91   13.54
   1  -8  -2  751.10   15.68
  -1  -8   2  747.14   11.56
   1  -8  -2  743.55   12.98
  -1   8   2  753.90   15.35
  -1  -8   1 2352.10   34.46
   1  -8  -1 2360.05   36.01
  -1  -8   1 2349.79   31.89
   1  -8  -1 2331.44   33.93
  -1   8   1 2246.82   36.50
  -1  -8   0 2822.74   41.11
   1  -8   0 2798.08   41.59
   1  -8   0 2818.04   40.66
  -1  -8   0 2924.01   38.27
  -1  -8  -1 1583.59   25.39
   1  -8   1 1598.87   25.31
  -1  -8  -1 1639.04   22.52
   1   8   1 1557.18   22.93
  -1  -8  -2 3247.20   46.13
   1  -8   2 3117.58   46.89
   1   8   2 3172.04   45.05
  -1  -8  -3 1287.23   20.54
   1  -8   3 1324.91   23.47
   1   8   3 1354.98   18.49
   1  -8   4 3333.88   49.70
   1  -8   4 3169.75   44.46
   1  -8   4 3162.09   44.46
   1  -8   4 3386.98   47.60
   1   8   4 3313.61   44.16
   1  -8   4 3326.12   44.26
   1  -8   5 2251.41   35.94
   1  -8   5 2152.09   31.02
   1  -8   5 2250.04   31.17
   1  -8   5 2311.18   34.11
   1   8   5 2181.27   31.10
   1  -8   5 2141.30   31.07
   1  -8   6 5074.22   71.33
   1  -8   6 4994.62   68.50
   1  -8   6 5056.87   73.15
   1  -8   7  639.51   13.66
   1  -8   7  627.35   11.83
   1  -8   7  651.70   14.89
   1  -8   8 2674.14   41.87
   1  -8   8 2706.13   43.44
  -1  -8  -9 1654.58   28.90
   1  -8   9 1747.62   31.40
   1  -8   9 1759.50   29.28
   1  -8   9 1708.52   28.87
   1  -8   9 1803.37   30.21
   1  -8   9 1809.44   29.04
  -1  -8 -10 2285.90   37.37
   1  -8  10 2301.20   37.22
   1  -8  10 2254.01   39.65
   1  -8  10 2318.90   36.92
   1  -8  10 2342.63   38.19
   1  -8  10 2391.34   36.84
  -1  -8 -11 2183.15   36.55
   1  -8  11 2160.69   36.12
   1  -8  11 2187.00   38.95
   1  -8  11 2237.45   35.87
   1  -8  11 2268.21   35.59
  -1  -8 -11 2238.80   35.37
   1  -8  11 2226.00   37.46
   1  -8  12 1937.78   33.13
   1  -8  12 1906.63   35.94
  -1  -8 -12 1954.21   33.75
  -1  -8 -12 1986.05   32.54
   1  -8  12 1966.47   32.50
   1  -8  12 2027.16   34.58
   1  -8  13 2012.68   38.37
  -1  -8 -13 2144.29   34.93
   1  -8  13 2046.08   35.08
  -1  -8 -13 2209.85   36.43
   1  -8  13 2135.26   36.73
  -1  -8 -14 1665.10   29.57
   1  -8  14 1549.39   28.63
  -1   8 -14 1592.68   28.02
  -1  -8 -14 1655.08   28.47
  -1  -8 -15  822.89   17.86
  -1   8 -15  778.33   16.64
  -1  -8 -15  821.73   17.05
  -1  -8 -16  624.06   14.42
  -1   8 -16  597.18   13.51
  -1  -8 -16  619.33   13.81
  -1  -8 -17  330.76    9.20
  -1  -8 -17  329.48    8.83
  -1   8 -17  320.50    8.64
  -1  -8 -18  360.44    8.87
  -1  -8 -18  350.26    8.44
  -1  -8 -19  141.73    4.45
   1  -9 -19  124.93    4.26
   1  -9 -18  920.85   16.92
   1  -9 -17  515.44   12.03
   1  -9 -16 1532.40   26.98
  -1  -9  16 1509.56   25.14
   1  -9 -15  355.33    9.32
   1  -9 -15  359.73   10.57
  -1  -9  15  356.75    9.85
   1  -9 -14 2737.31   44.08
  -1  -9  14 2835.83   43.51
  -1  -9  13  273.26    9.88
  -1  -9  13  286.76    9.48
   1  -9 -13  295.69    9.58
  -1  -9  13  273.58    8.54
  -1  -9  12 2119.96   35.16
  -1  -9  12 2179.21   37.67
  -1  -9  12 2243.95   37.13
   1  -9 -12 2157.93   36.46
  -1  -9  12 2074.37   41.55
  -1  -9  11  378.90   10.34
  -1  -9  11  377.19   11.54
   1  -9 -11  367.79   10.75
  -1  -9  11  402.46   13.84
  -1  -9  11  390.63   11.36
  -1  -9  10 3881.80   62.36
  -1  -9  10 3897.45   58.19
  -1  -9   9  340.63   12.21
  -1  -9   9  340.02    9.49
  -1  -9   9  353.89   10.32
  -1  -9   8 3218.59   48.59
  -1  -9   8 3219.28   49.72
  -1  -9   8 3136.35   49.32
  -1  -9   8 3329.08   52.75
  -1  -9   7  402.79   10.53
  -1  -9   7  402.23   11.88
  -1  -9   6 3939.00   58.61
  -1  -9   6 4124.97   60.42
   1  -9  -5  581.56   12.07
  -1  -9   5  613.91   12.92
   1  -9  -4 4007.62   57.40
  -1  -9   4 4186.57   57.22
  -1  -9   4 4068.68   58.59
  -1   9   3 1147.26   21.32
   1  -9  -3 1074.93   18.15
   1  -9  -3 1088.69   21.41
  -1  -9   3 1130.60   19.32
  -1  -9   3 1108.50   16.95
  -1   9   2 5484.16   79.99
   1  -9  -2 5510.72   80.24
  -1  -9   2 5743.24   77.46
   1  -9  -2 5529.06   76.05
  -1  -9   2 5542.54   74.05
  -1   9   1  141.83    5.75
   1  -9  -1  156.72    4.73
  -1  -9   1  158.79    3.51
  -1  -9   1  156.73    5.27
   1  -9  -1  157.62    6.03
  -1   9   0 2612.58   41.30
  -1  -9   0 2703.55   41.02
   1  -9   0 2677.27   41.41
   1  -9   0 2725.57   39.87
  -1  -9  -1  255.76    5.04
  -1  -9  -1  252.75    7.35
   1  -9   1  244.58    7.08
   1   9   2 1673.11   25.39
  -1  -9  -2 1744.80   27.49
   1  -9   2 1694.22   27.66
  -1  -9  -3  123.89    4.18
   1  -9   3  117.06    5.25
   1  -9   4 1263.62   23.58
   1  -9   5    7.39    1.83
   1  -9   5    7.09    1.39
   1  -9   6 1046.88   18.89
   1  -9   6  952.22   15.59
   1  -9   6 1048.80   21.01
   1  -9   6  952.23   15.57
   1  -9   7   34.03    2.84
   1  -9   7   29.14    1.87
   1  -9   7   33.96    3.43
   1  -9   7   28.58    1.84
   1  -9   8  157.63    5.89
   1  -9   8  149.03    7.13
   1  -9   8  141.66    4.62
   1  -9   8  141.61    6.05
   1  -9   8  153.50    5.95
   1  -9   8  145.28    5.72
   1  -9   9    7.06    1.63
   1  -9   9    6.88    1.66
   1  -9   9    9.46    1.35
   1  -9   9    9.48    2.30
   1  -9   9    7.22    1.65
   1  -9   9    8.54    1.64
   1  -9  10  127.45    6.07
   1  -9  10  119.31    5.45
   1  -9  10  129.72    5.76
   1  -9  10  123.47    6.89
   1  -9  10  123.86    5.42
  -1  -9 -11   90.88    5.13
   1  -9  11   89.37    5.23
   1  -9  11   95.64    4.90
   1  -9  11   91.74    4.97
   1  -9  11   94.54    6.15
   1  -9  11   91.87    4.71
  -1  -9 -12  430.42   12.05
   1  -9  12  422.86   12.36
   1  -9  12  439.12   11.35
   1  -9  12  431.69   10.99
   1  -9  12  410.66   11.47
   1  -9  12  409.31   13.80
   1  -9  13  147.82    6.00
   1  -9  13  143.05    7.90
  -1  -9 -13  146.52    6.73
   1  -9  13  141.50    6.30
  -1  -9 -14  621.65   15.16
  -1  -9 -14  609.44   13.91
   1  -9  14  614.30   14.59
  -1  -9 -15  154.91    6.69
  -1  -9 -15  145.89    5.96
   1  -9  15  150.91    6.68
  -1  -9 -16  508.14   12.58
  -1  -9 -17  274.78    8.13
  -1  -9 -18  507.49   10.92
  -1  -9 -19   92.16    3.41
   1 -10 -19   16.00    1.61
   1 -10 -18  675.59   13.26
   1 -10 -17   64.72    3.74
  -1 -10  16  856.83   16.08
   1 -10 -16  861.99   17.58
   1 -10 -15   16.13    2.44
  -1 -10  15   15.19    2.23
  -1 -10  14  816.98   17.07
  -1 -10  14  858.39   17.73
   1 -10 -14  827.15   18.17
  -1 -10  13  190.39    7.05
  -1 -10  13  199.15    7.08
   1 -10 -13  196.51    7.73
  -1 -10  13  204.53    7.79
  -1 -10  12  348.84   11.53
  -1 -10  12  386.16   11.21
  -1 -10  12  359.79   10.26
  -1 -10  11   54.43    4.09
  -1 -10  11   51.08    3.67
  -1 -10  10   87.89    5.06
  -1 -10  10   81.49    4.63
   1 -10 -10   76.88    4.63
   1 -10  -9  322.16    9.56
  -1 -10   9  322.16   10.18
  -1 -10   9  323.51    9.53
  -1 -10   9  347.57   12.61
  -1 -10   9  326.56   10.12
  -1 -10   8    6.81    1.81
  -1 -10   8    5.65    2.09
  -1 -10   8    4.73    1.49
  -1 -10   8    4.44    1.54
  -1 -10   7   41.73    3.18
  -1 -10   7   41.32    3.32
  -1 -10   7   40.52    3.23
  -1 -10   7   38.88    3.62
  -1 -10   6  651.54   14.63
  -1 -10   6  699.57   14.75
  -1 -10   5  198.02    6.79
  -1 -10   5  200.45    5.89
   1 -10  -5  192.76    6.00
   1 -10  -4 1146.03   19.70
  -1  10   4 1200.43   23.47
  -1 -10   4 1211.23   21.33
  -1 -10   4 1180.64   18.55
   1 -10  -3  116.94    4.28
  -1  10   3  121.05    6.03
  -1 -10   3  128.94    5.08
   1 -10  -3  129.62    6.16
  -1 -10   3  120.37    3.38
   1 -10  -2 2515.18   37.05
  -1  10   2 2413.68   40.70
  -1 -10   2 2547.45   34.97
  -1 -10   2 2572.50   38.91
   1 -10  -2 2526.46   41.63
  -1  10   1   84.27    4.50
  -1 -10   1   92.85    2.63
   1 -10  -1   95.90    3.74
   1 -10  -1   96.90    5.11
  -1 -10   0 5692.38   75.63
  -1 -10   0 5638.15   80.56
   1 -10   0 5700.68   81.01
  -1 -10  -1   44.09    1.80
   1 -10   1   49.19    3.26
  -1 -10  -1   41.47    3.14
   1 -10   1   40.45    2.61
  -1 -10  -2 4909.31   69.70
   1 -10   2 4849.52   69.81
   1 -10   2 4895.88   69.44
  -1 -10  -3   88.56    3.62
   1 -10   3   81.14    4.29
   1 -10   4 6991.54   99.08
   1 -10   5  344.16   10.72
   1 -10   6 4490.54   66.02
   1 -10   6 4550.03   65.29
   1 -10   6 4646.77   69.35
   1 -10   6 4424.34   65.05
   1 -10   7    4.90    1.52
   1 -10   7    7.11    1.62
   1 -10   7    4.99    1.50
   1 -10   8 3760.34   56.47
   1 -10   8 3763.93   56.79
   1 -10   8 3855.99   56.73
   1 -10   8 3708.02   57.43
   1 -10   8 3893.43   61.55
  -1 -10  -9   67.53    4.24
   1 -10   9   69.21    4.17
   1 -10   9   66.96    4.24
   1 -10   9   77.51    4.37
   1 -10   9   70.75    4.54
   1 -10   9   72.23    5.55
   1 -10  10 3551.71   55.13
   1 -10  10 3653.36   55.63
   1 -10  10 3722.88   55.28
   1 -10  10 3603.62   56.65
   1 -10  10 3670.87   60.63
   1 -10  11  112.08    5.43
   1 -10  11  111.62    5.59
   1 -10  11  105.62    5.22
   1 -10  11  105.05    5.79
   1 -10  11   96.68    6.73
  -1 -10 -12 2411.28   40.26
   1 -10  12 2398.31   40.92
   1 -10  12 2450.24   39.14
   1 -10  12 2352.94   39.42
   1 -10  12 2424.11   44.39
   1 -10  12 2408.35   38.71
   1 -10  13    3.58    1.70
   1 -10  13    4.86    1.67
  -1 -10 -13    3.74    1.81
  -1 -10 -14 2233.27   37.58
   1 -10  14 2286.35   35.64
  -1 -10 -15   33.01    3.21
   1 -10  15   31.77    3.18
  -1 -10 -16 1201.29   22.29
  -1 -10 -17   11.43    1.86
  -1 -10 -18 1312.70   21.67
   1 -11 -18  948.43   16.64
   1 -11 -17   84.90    4.10
   1 -11 -16 1202.11   21.89
  -1 -11  16 1177.05   20.22
   1 -11 -15  171.77    6.77
  -1 -11  15  161.79    6.08
   1 -11 -14 1563.43   28.22
  -1 -11  14 1568.25   27.56
  -1 -11  14 1549.90   27.10
  -1 -11  13  155.50    6.20
  -1 -11  13  164.75    6.86
  -1 -11  13  157.38    6.37
  -1 -11  12 4537.99   66.80
  -1 -11  12 4395.21   66.41
  -1 -11  12 4586.05   67.79
   1 -11 -11  349.98   10.69
  -1 -11  11  336.88   10.12
  -1 -11  11  355.69   10.85
   1 -11 -10 5246.32   77.24
  -1 -11  10 5107.00   78.77
  -1 -11  10 5269.92   76.90
   1 -11  -9  446.59   11.81
  -1 -11   9  430.67   12.66
  -1 -11   9  442.18   11.83
  -1 -11   9  457.15   12.38
   1 -11  -8 4311.17   64.05
  -1 -11   8 4378.82   66.07
  -1 -11   8 4386.29   64.66
  -1 -11   8 4327.14   65.31
  -1 -11   7  143.59    6.48
  -1 -11   7  147.86    6.15
  -1 -11   7  143.62    6.24
  -1 -11   6 5351.38   76.26
  -1 -11   6 5206.97   76.88
   1 -11  -5  404.37    9.87
  -1 -11   5  418.28   11.18
  -1 -11   4 3971.00   58.00
   1 -11  -4 3821.00   55.59
  -1 -11   3   76.26    4.23
   1 -11  -3   75.96    4.97
   1 -11  -3   74.81    3.46
  -1 -11   2 2888.42   43.84
   1 -11  -2 2805.92   41.03
  -1 -11   1  317.13    9.33
   1 -11  -1  302.49   10.11
   1 -11  -1  291.88    7.44
  -1 -11   0 1662.73   29.24
   1 -11   0 1714.63   29.84
   1 -11   0 1649.95   26.47
   1 -11   1  546.39   13.34
   1 -11   1  551.50   11.77
   1 -11   2 1968.19   32.98
  -1 -11  -2 1980.93   32.33
   1 -11   2 2013.58   31.78
   1 -11   3  227.94    7.61
   1 -11   3  225.96    7.39
   1 -11   4  987.45   19.89
   1 -11   5   55.85    4.16
   1 -11   5   56.99    3.57
   1 -11   6  294.36   10.44
   1 -11   6  289.02    8.66
   1 -11   7   80.67    4.50
   1 -11   7   82.87    4.75
   1 -11   7   76.81    5.52
   1 -11   7   72.93    4.25
   1 -11   7   73.11    4.25
   1 -11   8    9.07    2.54
  -1 -11  -8    7.60    1.88
   1 -11   8   11.24    2.03
   1 -11   8    6.93    1.73
   1 -11   8    9.56    1.84
   1 -11   8    6.38    1.69
   1 -11   9   28.90    3.06
   1 -11   9   31.04    3.09
   1 -11   9   31.23    3.06
  -1 -11  -9   31.48    3.12
   1 -11   9   32.24    3.03
   1 -11   9   34.24    4.18
   1 -11  10   18.26    2.47
   1 -11  10   23.63    2.80
  -1 -11 -10   15.53    2.59
   1 -11  10   12.79    3.07
   1 -11  10   17.11    2.53
   1 -11  10   15.30    2.25
   1 -11  11   13.98    2.39
   1 -11  11   14.55    2.44
   1 -11  11   14.81    2.24
   1 -11  11   18.83    2.37
   1 -11  11   14.29    3.15
   1 -11  12   40.13    3.38
   1 -11  12   39.16    3.48
   1 -11  12   38.74    3.23
   1 -11  13   48.55    3.56
  -1 -11 -13   46.29    3.91
   1 -11  13   55.77    4.00
   1 -11  13   44.19    3.24
  -1 -11 -14  693.36   15.85
   1 -11  14  663.34   14.21
   1 -11  15   23.29    2.76
  -1 -11 -15   22.98    2.74
  -1 -11 -16  515.96   12.20
  -1 -11 -17   43.85    2.96
  -1 -11 -18  651.21   12.23
   1 -11  18  613.12   13.27
   1 -12 -18  619.13   11.76
   1 -12 -17  124.68    4.67
  -1 -12  17   65.95    3.49
   1 -12 -16  524.42   11.93
  -1 -12  16  502.72   10.59
  -1 -12  15  142.96    5.51
  -1 -12  15  151.66    5.88
   1 -12 -15  144.23    6.04
  -1 -12  14  133.52    5.76
  -1 -12  14  130.95    5.15
  -1 -12  14  136.61    5.72
  -1 -12  13  199.23    7.52
  -1 -12  13  198.46    7.25
  -1 -12  13  212.30    7.23
  -1 -12  12   40.71    3.59
   1 -12 -12   38.96    3.56
  -1 -12  12   38.52    3.25
  -1 -12  12   36.88    3.26
  -1 -12  11   23.09    2.69
  -1 -12  11   19.29    2.73
   1 -12 -11   18.85    2.70
  -1 -12  10   27.78    2.95
   1 -12 -10   29.13    3.09
  -1 -12  10   24.49    3.18
  -1 -12  10   25.34    3.05
  -1 -12   9  226.00    8.21
   1 -12  -9  222.46    8.06
  -1 -12   9  238.68    9.31
  -1 -12   9  229.20    8.49
  -1 -12   8  421.83   11.63
  -1 -12   8  426.20   12.69
   1 -12  -8  415.64   11.21
  -1 -12   8  423.23   11.88
  -1 -12   7   45.60    3.57
   1 -12  -7   49.85    3.51
  -1 -12   7   47.92    4.00
   1 -12  -7   41.34    3.36
  -1 -12   6  197.71    7.29
  -1 -12   6  184.50    7.61
  -1 -12   5  147.90    6.56
  -1 -12   4   74.65    4.56
   1 -12  -4   70.53    3.62
   1 -12  -3  477.22   13.66
  -1 -12   3  473.76   12.50
   1 -12  -3  449.82   10.28
  -1 -12   2  411.93   11.55
   1 -12  -2  405.07   12.70
   1 -12  -2  377.59    9.07
  -1 -12   1  447.63   12.44
   1 -12  -1  445.82   13.46
   1 -12  -1  436.70    9.84
   1 -12   0 3968.43   60.95
  -1 -12   0 3990.78   60.27
   1 -12   0 3816.27   55.83
   1 -12   1  946.59   20.07
  -1 -12  -1  949.59   19.87
   1 -12   1  921.09   17.17
  -1 -12  -2 3214.67   48.88
   1 -12   2 3204.76   50.62
   1 -12   2 3272.50   48.25
   1 -12   3 1352.64   25.44
   1 -12   3 1370.52   24.17
   1 -12   4 4023.27   60.77
   1 -12   4 4017.51   60.21
   1 -12   5 1049.44   21.53
   1 -12   5 1111.74   20.75
   1 -12   5 1087.04   20.72
   1 -12   5 1045.35   21.83
   1 -12   6 4525.38   66.92
   1 -12   6 4302.91   69.27
   1 -12   7 1493.26   30.10
   1 -12   7 1515.50   27.20
   1 -12   7 1519.20   27.21
   1 -12   7 1487.40   27.04
  -1 -12  -7 1509.91   26.84
  -1 -12  -8 3187.27   49.49
   1 -12   8 3177.72   54.13
   1 -12   8 3238.78   49.91
   1 -12   8 3060.40   50.62
   1 -12   8 3234.20   49.77
   1 -12   8 3132.48   49.55
  -1 -12  -9 1089.94   21.92
   1 -12   9 1126.00   25.96
   1 -12   9 1069.06   21.92
   1 -12   9 1064.42   22.76
   1 -12   9 1101.95   21.82
   1 -12   9 1090.68   21.72
  -1 -12 -10 2225.60   37.13
   1 -12  10 2231.21   41.94
   1 -12  10 2091.09   37.74
   1 -12  10 2122.35   36.40
   1 -12  10 2160.81   36.79
   1 -12  10 2187.50   36.62
   1 -12  11  965.47   19.94
  -1 -12 -11  983.74   20.66
   1 -12  11  941.85   20.10
   1 -12  11  964.01   19.81
   1 -12  12 1863.77   31.68
   1 -12  12 1803.84   31.94
   1 -12  12 1840.68   31.39
   1 -12  13  496.10   12.14
   1 -12  13  474.26   12.47
   1 -12  13  479.31   11.70
   1 -12  14 1583.80   26.52
   1 -12  14 1547.67   27.57
  -1 -12 -14 1588.13   28.28
   1 -12  15  333.37    8.16
  -1 -12 -15  338.27    9.66
   1 -12  15  336.28    9.68
  -1 -12 -16  916.10   17.52
   1 -12  17  403.75   10.65
  -1 -12 -17  412.02    9.44
  -1 -12 -18  521.45   10.07
   1 -13 -17  640.43   12.48
  -1 -13  16  374.21    8.26
  -1 -13  15  931.56   16.85
  -1 -13  15  991.72   17.71
   1 -13 -14  832.41   17.20
  -1 -13  14  824.24   16.50
  -1 -13  14  789.01   15.46
  -1 -13  14  790.82   16.37
   1 -13 -13 1427.95   26.08
  -1 -13  13 1403.45   25.22
  -1 -13  13 1427.48   24.88
  -1 -13  13 1400.56   25.61
   1 -13 -12 1413.72   26.32
  -1 -13  12 1385.28   25.61
  -1 -13  12 1434.38   25.83
  -1 -13  12 1421.68   26.34
   1 -13 -11 1884.01   32.64
  -1 -13  11 1839.63   32.16
  -1 -13  11 1856.94   32.49
  -1 -13  11 1870.98   32.73
   1 -13 -10 1471.27   27.07
  -1 -13  10 1444.79   27.01
  -1 -13  10 1470.09   27.48
  -1 -13   9 2012.47   37.18
   1 -13  -9 2014.51   34.41
  -1 -13   9 2035.67   34.86
  -1 -13   9 2029.98   35.21
  -1 -13   8 2677.80   45.73
   1 -13  -8 2672.71   42.61
  -1 -13   8 2639.06   43.29
  -1 -13   8 2698.56   43.72
  -1 -13   7 2455.25   42.69
   1 -13  -7 2419.08   39.30
  -1 -13   7 2458.16   40.68
  -1 -13   6 2525.12   40.54
  -1 -13   6 2508.42   40.44
   1 -13  -6 2469.41   38.75
  -1 -13   6 2611.10   42.82
  -1 -13   5 1832.46   31.07
  -1 -13   5 1869.51   33.14
  -1 -13   4 2804.72   43.02
  -1 -13   4 2820.16   45.37
  -1 -13   4 2696.43   42.47
   1 -13  -3 1684.15   27.83
  -1 -13   3 1816.71   32.33
   1 -13  -2 1322.74   27.32
  -1 -13   2 1285.31   25.73
   1 -13  -1 1041.52   18.79
  -1 -13   1 1073.71   23.10
   1 -13   0 1102.35   23.98
  -1 -13   0 1137.32   23.27
   1 -13   1 2201.91   38.73
  -1 -13  -1 2248.02   37.58
   1 -13   1 2130.00   33.86
   1 -13   2  614.30   15.78
  -1 -13  -2  619.43   13.83
   1 -13   2  620.37   13.24
   1 -13   3 1064.59   20.45
   1 -13   3 1060.32   22.22
   1 -13   3 1045.49   19.86
   1 -13   4 1470.31   25.77
   1 -13   4 1452.54   25.98
   1 -13   4 1447.66   27.65
   1 -13   4 1376.15   29.53
   1 -13   4 1482.78   26.19
   1 -13   5  126.96    5.72
   1 -13   5  113.40    7.41
  -1 -13  -5  125.42    5.40
   1 -13   5  141.33    6.32
   1 -13   5  122.59    6.25
   1 -13   6  274.42    9.77
   1 -13   6  298.06   12.35
   1 -13   6  271.39    9.71
   1 -13   6  294.11    9.31
  -1 -13  -6  299.06    9.00
   1 -13   6  280.38    9.14
   1 -13   7  159.99    7.78
   1 -13   7  171.25    7.04
  -1 -13  -7  170.88    6.89
   1 -13   7  175.19    7.09
  -1 -13  -8  353.41   10.56
   1 -13   8  351.83   10.60
   1 -13   8  348.41   10.66
   1 -13   8  343.17   10.57
   1 -13   9    2.60    1.66
   1 -13   9    2.92    1.70
   1 -13   9    2.85    1.61
   1 -13   9    2.81    1.53
  -1 -13  -9    6.69    2.01
   1 -13  10  103.06    5.63
   1 -13  10  105.56    5.54
   1 -13  10  105.81    5.59
  -1 -13 -10  106.55    5.75
   1 -13  11    5.50    1.62
  -1 -13 -11    6.26    2.00
   1 -13  11    9.35    2.03
   1 -13  11    4.70    1.81
   1 -13  12   51.62    3.63
   1 -13  12   50.33    3.72
  -1 -13 -12   54.45    4.13
   1 -13  12   49.12    3.80
   1 -13  13  145.99    5.74
   1 -13  13  143.41    6.17
  -1 -13 -13  149.15    6.55
   1 -13  13  150.27    6.00
   1 -13  14  158.24    5.68
   1 -13  14  154.88    6.22
   1 -13  15  393.52    8.71
   1 -13  15  388.64   12.17
   1 -13  15  391.38   10.18
   1 -13  16  354.94   10.06
  -1 -13 -16  357.79    9.01
  -1 -13 -17  287.73    7.22
  -1 -14  16   27.81    1.89
  -1 -14  15  166.31    5.81
  -1 -14  15  147.41    5.08
   1 -14 -15  155.91    5.77
  -1 -14  14   12.15    1.93
  -1 -14  14   13.08    1.98
  -1 -14  14   14.66    1.78
   1 -14 -14   13.09    2.15
  -1 -14  14   10.20    1.85
  -1 -14  13  255.60    8.00
  -1 -14  13  242.52    8.53
  -1 -14  13  261.37    7.84
   1 -14 -13  265.47    8.52
  -1 -14  13  261.67    8.24
  -1 -14  12   70.30    4.23
  -1 -14  12   70.71    5.03
  -1 -14  12   73.64    4.29
   1 -14 -12   75.27    4.56
  -1 -14  12   70.09    4.40
  -1 -14  11   70.37    4.43
  -1 -14  11   75.69    4.59
  -1 -14  11   73.54    5.35
  -1 -14  11   72.22    4.64
   1 -14 -11   69.18    4.46
   1 -14 -10    3.76    1.67
  -1 -14  10    3.82    1.65
  -1 -14  10    6.83    2.33
  -1 -14  10    3.04    1.77
  -1 -14  10    4.42    1.66
  -1 -14   9   71.36    5.28
  -1 -14   9   73.19    4.78
  -1 -14   9   75.35    4.75
   1 -14  -9   72.03    4.49
  -1 -14   8   63.21    4.89
  -1 -14   8   72.47    5.46
   1 -14  -8   64.82    4.25
  -1 -14   8   64.96    4.46
  -1 -14   7  356.47   12.49
  -1 -14   7  357.03   10.82
   1 -14  -7  350.09    9.94
  -1 -14   6    4.98    1.84
  -1 -14   6    6.93    2.11
   1 -14  -6    3.53    1.58
   1 -14  -6    4.64    1.57
  -1 -14   5  353.05   12.01
  -1 -14   5  324.25    9.97
   1 -14  -4  181.96    7.10
  -1 -14   4  193.63    8.77
  -1 -14   4  195.99    7.47
  -1 -14   4  200.09    7.43
  -1 -14   3  842.29   17.40
   1 -14  -3  798.83   17.24
  -1 -14   3  856.00   17.77
   1 -14  -3  774.46   15.68
  -1 -14   3  850.18   20.43
  -1 -14   2   25.55    2.66
   1 -14  -2   28.58    2.93
   1 -14  -2   29.90    2.96
  -1 -14   2   27.75    2.79
   1 -14  -2   29.64    2.38
   1 -14  -2   33.13    3.97
  -1 -14   1 1356.25   24.63
   1 -14  -1 1353.06   25.01
   1 -14  -1 1360.86   25.76
  -1 -14   1 1444.09   25.49
   1 -14  -1 1365.67   23.45
   1 -14  -1 1523.50   30.80
  -1 -14   1 1522.96   29.60
   1 -14   0  163.53    6.16
  -1 -14   0  163.40    6.36
   1 -14   0  156.38    6.32
   1 -14   0  168.44    7.12
   1 -14   0  169.10    8.69
  -1 -14   0  180.30    8.21
   1 -14   0  159.97    5.58
   1 -14   1 1451.79   24.90
   1 -14   1 1435.19   25.40
   1 -14   1 1425.23   24.17
   1 -14   1 1419.47   27.39
   1 -14   1 1500.74   30.24
  -1 -14  -1 1481.77   27.25
   1 -14   1 1381.27   25.55
   1 -14   2  304.50    9.09
   1 -14   2  293.46    8.63
   1 -14   2  288.70   10.27
   1 -14   2  311.62   11.18
   1 -14   2  282.87    8.96
   1 -14   3 2051.02   34.05
   1 -14   3 2021.54   33.44
   1 -14   3 1988.30   36.90
   1 -14   3 2042.69   36.91
   1 -14   3 2022.40   34.06
   1 -14   4  614.76   14.60
   1 -14   4  579.31   16.87
   1 -14   4  620.75   16.24
   1 -14   4  622.47   14.73
   1 -14   4  613.31   14.27
  -1 -14  -5 2663.22   42.19
   1 -14   5 2675.01   45.58
   1 -14   5 2623.67   48.23
   1 -14   6  686.99   15.93
   1 -14   6  680.73   15.94
  -1 -14  -6  680.71   15.28
   1 -14   6  689.46   19.85
   1 -14   6  696.33   16.15
   1 -14   6  669.54   17.21
   1 -14   7 5303.44   77.20
  -1 -14  -7 5170.86   76.16
   1 -14   7 5357.14   84.98
   1 -14   7 5276.70   77.20
   1 -14   7 5071.87   78.81
   1 -14   8  638.68   15.46
   1 -14   8  622.58   15.41
   1 -14   8  686.64   20.69
  -1 -14  -8  634.19   15.17
   1 -14   8  650.45   15.65
   1 -14   9 3475.18   54.04
   1 -14   9 3408.18   54.01
   1 -14   9 3594.92   63.00
  -1 -14  -9 3485.19   53.99
   1 -14   9 3451.91   54.11
   1 -14  10  287.47    9.46
   1 -14  10  278.44    9.44
   1 -14  10  303.30   13.45
  -1 -14 -10  299.93    9.74
   1 -14  10  285.77    9.49
   1 -14  11 1993.89   33.45
   1 -14  11 1918.63   33.58
   1 -14  11 2036.86   41.02
  -1 -14 -11 1953.71   33.92
   1 -14  11 1970.60   33.52
   1 -14  12  384.16   10.35
   1 -14  12  372.54   10.63
   1 -14  12  399.92   14.74
  -1 -14 -12  392.58   11.10
   1 -14  12  376.93   10.41
   1 -14  13 1767.79   29.29
   1 -14  13 1853.41   35.50
   1 -14  13 1760.67   30.23
  -1 -14 -13 1799.47   30.78
   1 -14  13 1820.55   29.69
   1 -14  14  357.76   11.76
   1 -14  14  357.90    9.63
  -1 -14 -14  372.97    9.94
   1 -14  14  354.30    8.74
   1 -14  15 1409.12   25.93
   1 -14  15 1411.55   22.22
   1 -14  16  174.98    5.64
   1 -15 -16   82.64    3.46
   1 -15 -15 1764.52   27.75
  -1 -15  15 1823.44   27.90
  -1 -15  14   51.00    2.83
   1 -15 -14   56.76    3.47
  -1 -15  14   51.61    3.24
  -1 -15  14   49.62    3.09
  -1 -15  13 1715.97   28.14
   1 -15 -13 1776.16   29.30
  -1 -15  13 1720.35   28.72
  -1 -15  13 1726.88   28.88
  -1 -15  12   88.18    4.49
   1 -15 -12   89.56    4.74
  -1 -15  12   84.21    4.51
  -1 -15  12   80.94    4.56
  -1 -15  11 1906.12   32.18
  -1 -15  11 1820.46   32.25
   1 -15 -11 1936.22   32.24
  -1 -15  11 1880.39   31.98
   1 -15 -10    9.23    2.11
  -1 -15  10   13.28    2.38
  -1 -15  10    9.69    1.99
  -1 -15  10    9.55    1.99
  -1 -15   9 2316.77   39.52
   1 -15  -9 2376.58   38.54
  -1 -15   9 2413.23   39.70
  -1 -15   9 2341.60   39.12
  -1 -15   8  131.14    6.28
   1 -15  -8  128.34    5.78
  -1 -15   7 2506.19   41.43
  -1 -15   7 2594.69   46.09
  -1 -15   7 2532.44   41.35
  -1 -15   6   41.52    3.65
  -1 -15   6   47.75    4.85
   1 -15  -6   42.74    3.19
   1 -15  -6   36.53    3.26
  -1 -15   5 3522.55   57.91
  -1 -15   5 3534.88   52.98
   1 -15  -4   30.68    3.01
  -1 -15   4   26.37    3.71
  -1 -15   4   21.37    2.73
  -1 -15   4   29.63    3.10
   1 -15  -3 4197.61   64.14
  -1 -15   3 4447.21   70.11
  -1 -15   3 4435.93   64.74
  -1 -15   3 4228.99   64.20
   1 -15  -2  149.69    6.51
  -1 -15   2  155.75    6.47
  -1 -15   2  170.98    8.71
   1 -15  -2  170.67    8.62
  -1 -15   2  147.63    6.40
   1 -15  -1 2317.15   37.29
   1 -15  -1 2310.71   39.01
  -1 -15   1 2242.89   37.88
   1 -15  -1 2330.07   38.82
   1 -15  -1 2576.27   44.77
  -1 -15   1 2570.02   43.95
  -1 -15   1 2403.14   38.51
   1 -15   0   10.88    1.87
   1 -15   0    7.17    1.59
  -1 -15   0    4.61    1.52
   1 -15   0    4.40    1.72
  -1 -15   0    7.20    1.83
   1 -15   0   10.37    2.81
   1 -15   0    7.26    1.98
   1 -15   1 2416.56   39.15
   1 -15   1 2467.96   41.26
   1 -15   1 2374.80   39.56
   1 -15   1 2550.03   45.68
   1 -15   1 2480.77   38.58
  -1 -15  -1 2414.66   38.72
   1 -15   2    2.33    1.38
   1 -15   2    5.17    1.47
  -1 -15  -2    2.78    1.24
   1 -15   2    4.03    1.85
   1 -15   2    4.94    2.15
   1 -15   2    5.60    1.73
   1 -15   3  584.26   14.15
   1 -15   3  573.25   13.58
   1 -15   3  570.32   15.70
   1 -15   3  587.53   16.69
   1 -15   3  557.08   14.00
   1 -15   4  149.01    6.54
   1 -15   4  137.67    6.12
   1 -15   4  147.13    7.70
   1 -15   4  145.27    6.52
   1 -15   4  141.22    7.62
   1 -15   5  280.27   11.28
   1 -15   5  261.97   10.40
   1 -15   5  275.66    9.12
   1 -15   6  400.45   11.55
   1 -15   6  406.33   11.49
  -1 -15  -6  380.38   10.66
   1 -15   6  384.25   12.79
   1 -15   6  405.72   14.38
   1 -15   7   18.53    2.66
   1 -15   7   16.76    3.56
  -1 -15  -7   20.99    2.62
   1 -15   7   19.77    2.66
   1 -15   8   16.67    2.58
   1 -15   8   19.32    3.73
  -1 -15  -8   20.43    2.72
   1 -15   8   20.70    2.74
  -1 -15  -9   48.22    3.80
   1 -15   9   52.04    3.94
   1 -15   9   49.16    3.85
   1 -15   9   47.92    5.34
   1 -15   9   47.79    3.81
   1 -15  10   16.82    2.53
   1 -15  10   17.02    2.36
  -1 -15 -10   14.76    2.40
   1 -15  10   14.72    3.47
   1 -15  10   20.48    2.70
   1 -15  11   80.07    4.67
   1 -15  11   80.56    4.50
   1 -15  11   82.75    6.37
   1 -15  11   80.87    4.57
  -1 -15 -11   84.90    4.88
   1 -15  12    3.90    1.38
   1 -15  12    4.07    1.54
  -1 -15 -12    4.46    1.76
   1 -15  12    4.11    2.29
   1 -15  12    4.95    1.69
   1 -15  13  247.70    7.75
   1 -15  13  254.81    7.36
   1 -15  13  235.95    9.14
   1 -15  13  251.03    7.24
  -1 -15 -13  259.54    8.03
   1 -15  14   16.24    2.14
   1 -15  14   13.89    2.34
  -1 -15 -14   17.36    2.18
   1 -15  14   14.46    1.69
   1 -15  15  410.48    9.32
  -1 -15 -15  442.48    9.47
   1 -16 -15  840.07   14.76
  -1 -16  15  800.52   13.77
   1 -16 -14    4.77    1.45
  -1 -16  14    5.98    1.29
  -1 -16  14    6.40    1.16
  -1 -16  14    5.73    1.47
  -1 -16  13  352.89    8.71
  -1 -16  13  365.08    9.18
   1 -16 -13  383.62    9.55
  -1 -16  13  369.64    9.28
   1 -16 -12    1.18    1.42
  -1 -16  12    0.95    1.28
  -1 -16  12    4.77    1.37
  -1 -16  12    2.35    1.35
  -1 -16  11  192.92    6.89
  -1 -16  11  192.47    7.09
   1 -16 -11  201.89    7.09
  -1 -16  11  183.50    6.80
   1 -16 -10   10.27    2.07
  -1 -16  10   12.77    2.23
  -1 -16  10   10.62    2.01
  -1 -16  10   11.07    1.97
  -1 -16   9   43.67    3.64
  -1 -16   9   43.29    3.54
   1 -16  -9   42.75    3.37
  -1 -16   8   59.68    4.22
   1 -16  -8   61.57    3.95
  -1 -16   8   61.02    4.21
   1 -16  -7    6.43    1.70
  -1 -16   7    6.20    1.87
  -1 -16   7    7.29    1.98
  -1 -16   6  196.85    7.83
   1 -16  -5  240.24    8.38
  -1 -16   5  255.46    8.84
  -1 -16   5  259.54    9.03
   1 -16  -4   52.95    3.87
  -1 -16   4   62.07    5.74
  -1 -16   4   56.37    4.08
  -1 -16   4   60.39    4.28
   1 -16  -3 1648.76   29.91
  -1 -16   3 1680.93   30.25
  -1 -16   2  141.03    6.32
   1 -16  -2  137.05    6.21
  -1 -16   2  145.24    6.39
   1 -16  -1 1906.29   31.80
   1 -16  -1 1920.57   33.38
  -1 -16   1 1899.24   32.82
   1 -16  -1 1939.85   33.87
  -1 -16   1 1940.56   32.78
  -1 -16   0  145.49    6.05
   1 -16   0  144.93    6.04
   1 -16   0  160.14    6.90
  -1 -16   0  145.83    6.38
   1 -16   0  145.41    6.60
   1 -16   0  150.30    8.55
   1 -16   0  142.09    5.62
  -1 -16   0  145.64    6.11
  -1 -16  -1 2363.80   38.15
   1 -16   1 2458.61   39.55
   1 -16   1 2445.74   40.88
   1 -16   1 2378.63   40.04
  -1 -16  -1 2390.12   38.44
   1 -16   1 2484.66   38.67
   1 -16   2    6.72    1.74
   1 -16   2    5.43    1.60
  -1 -16  -2    3.76    1.38
   1 -16   2    3.46    1.76
   1 -16   2    7.29    2.51
   1 -16   2   10.67    2.31
   1 -16   3 2202.12   36.36
   1 -16   3 2143.15   35.59
   1 -16   3 2119.44   36.40
   1 -16   3 2160.50   41.27
   1 -16   3 2126.28   38.12
   1 -16   4   17.50    2.43
   1 -16   4   19.37    2.53
   1 -16   4   23.53    2.81
   1 -16   4   16.49    3.09
   1 -16   4   12.62    2.69
   1 -16   5 1253.00   26.69
   1 -16   5 1240.62   24.34
   1 -16   5 1241.89   23.82
   1 -16   5 1234.44   24.25
   1 -16   6   28.08    3.84
   1 -16   6   26.82    2.99
  -1 -16  -6   29.16    2.86
   1 -16   7 2304.14   37.82
   1 -16   7 2235.58   41.79
   1 -16   7 2268.52   37.41
   1 -16   7 2226.54   37.68
   1 -16   8  328.90   12.56
  -1 -16  -8  318.12    9.63
   1 -16   8  328.49   10.28
   1 -16   8  340.12   10.37
   1 -16   9 2513.39   40.69
  -1 -16  -9 2461.46   40.02
   1 -16   9 2384.98   44.62
   1 -16   9 2529.06   40.59
   1 -16   9 2532.63   40.69
   1 -16  10   71.62    4.26
  -1 -16 -10   65.87    4.20
   1 -16  10   62.85    5.35
   1 -16  10   69.10    4.29
   1 -16  10   70.24    4.33
   1 -16  11 2780.95   42.35
  -1 -16 -11 2745.14   42.64
   1 -16  11 2750.27   42.44
   1 -16  11 2751.64   42.67
   1 -16  12    9.38    1.64
   1 -16  12    9.23    2.24
   1 -16  12   12.53    2.04
   1 -16  12   11.17    1.84
  -1 -16 -12   10.08    1.95
  -1 -16 -13 2090.15   31.92
   1 -16  13 2056.20   30.73
   1 -16  13 2060.49   31.72
   1 -16  14   99.99    3.58
   1 -16  14  103.85    4.36
  -1 -17  14  299.72    7.03
  -1 -17  14  320.38    7.64
  -1 -17  13  702.33   13.40
  -1 -17  13  728.59   13.96
  -1 -17  13  753.03   14.28
   1 -17 -13  777.32   14.35
  -1 -17  12  368.47    9.08
  -1 -17  12  373.56    9.46
  -1 -17  12  387.04    9.51
   1 -17 -12  400.81    9.66
  -1 -17  11 1386.28   24.15
  -1 -17  11 1368.99   24.48
  -1 -17  11 1385.35   24.25
  -1 -17  10  414.35   10.74
  -1 -17  10  402.20   10.89
  -1 -17  10  411.61   10.73
   1 -17 -10  437.73   10.71
  -1 -17   9 1581.24   28.07
  -1 -17   9 1575.34   27.78
   1 -17  -9 1598.91   27.13
  -1 -17   8  624.02   14.92
  -1 -17   8  613.81   14.64
  -1 -17   8  618.24   14.51
  -1 -17   7 1937.18   33.61
  -1 -17   6  946.16   19.89
  -1 -17   6  930.29   19.78
  -1 -17   6  912.14   19.28
  -1 -17   5 1564.88   28.69
  -1 -17   5 1572.37   28.37
  -1 -17   5 1558.02   28.70
   1 -17  -4  518.64   13.07
  -1 -17   4  553.95   14.07
  -1 -17   4  570.20   13.89
  -1 -17   4  564.20   14.11
   1 -17  -3 1662.59   29.36
  -1 -17   3 1725.29   30.26
  -1 -17   3 1717.01   29.85
  -1 -17   3 1640.79   30.03
   1 -17  -2  429.49   11.63
  -1 -17   2  429.91   11.94
  -1 -17   2  437.36   11.60
  -1 -17   2  439.98   11.84
   1 -17  -1 1106.12   21.76
  -1 -17   1 1099.99   21.98
  -1 -17   1 1128.81   21.36
   1 -17  -1 1081.47   20.50
  -1 -17   1 1102.66   21.39
   1 -17   0  250.58    8.71
   1 -17   0  266.85    9.32
  -1 -17   0  254.94    8.86
   1 -17   0  257.39    7.67
  -1 -17   0  256.20    8.18
   1 -17   0  254.45    8.16
  -1 -17   0  249.32    8.03
   1 -17   1 1247.84   23.86
   1 -17   1 1187.10   23.67
   1 -17   1 1225.98   22.11
  -1 -17  -1 1201.04   21.82
  -1 -17  -1 1163.72   21.60
   1 -17   1 1226.84   22.85
   1 -17   2   58.34    4.32
   1 -17   2   53.60    4.05
   1 -17   2   52.96    3.61
   1 -17   2   51.12    3.78
   1 -17   3  373.91   11.50
   1 -17   3  370.28   10.99
   1 -17   3  356.79   10.16
   1 -17   3  356.98   10.58
   1 -17   4  199.36    8.36
   1 -17   4  177.98    7.42
   1 -17   4  184.14    7.10
   1 -17   4  194.34    7.55
   1 -17   5  232.97    9.28
   1 -17   5  233.28    8.47
   1 -17   5  239.13    8.46
   1 -17   5  230.33    8.10
   1 -17   6  101.47    6.23
   1 -17   6  102.84    5.30
   1 -17   7  145.23    7.41
   1 -17   7  150.15    6.43
   1 -17   7  158.44    6.73
   1 -17   8    8.66    2.40
   1 -17   8    6.45    1.84
   1 -17   8    5.25    1.65
  -1 -17  -8    5.17    1.65
   1 -17   9   19.31    2.91
   1 -17   9   14.92    2.33
   1 -17   9   17.06    2.28
  -1 -17  -9   15.06    2.30
   1 -17  10    2.17    1.33
   1 -17  10    2.99    1.52
   1 -17  10    1.95    1.63
   1 -17  10    3.60    1.58
  -1 -17 -10    2.14    1.53
   1 -17  11   59.14    3.45
   1 -17  11   51.11    3.69
  -1 -17 -11   59.59    3.66
   1 -17  11   56.46    3.53
   1 -17  11   58.83    3.52
   1 -17  12   27.33    2.31
  -1 -17 -12   29.06    2.57
   1 -17  12   28.07    2.49
   1 -17  12   20.66    2.17
   1 -17  13  119.64    4.15
  -1 -17 -13  122.42    4.68
   1 -17  13  122.94    4.69
  -1 -18  13   92.64    3.66
  -1 -18  13  101.22    3.93
  -1 -18  12   45.30    2.61
  -1 -18  12   45.09    2.86
  -1 -18  12   46.83    2.86
  -1 -18  11   56.49    3.16
  -1 -18  11   54.05    3.32
  -1 -18  11   52.93    3.20
  -1 -18  10   23.70    2.34
  -1 -18  10   24.15    2.31
  -1 -18   9    0.62    1.26
  -1 -18   9    0.79    1.18
  -1 -18   8    3.49    1.58
  -1 -18   8    2.93    1.46
  -1 -18   7    8.62    2.00
  -1 -18   6    9.60    2.12
  -1 -18   6    8.34    1.85
  -1 -18   6   10.62    1.98
  -1 -18   5  192.62    7.18
  -1 -18   5  189.05    7.33
  -1 -18   5  193.25    7.59
  -1 -18   4  486.33   12.35
  -1 -18   4  476.84   12.51
  -1 -18   4  496.81   12.99
  -1 -18   3  620.86   14.23
  -1 -18   3  622.73   14.96
  -1 -18   3  608.58   14.44
   1 -18  -3  578.89   13.61
   1 -18  -2  327.49   11.19
  -1 -18   2  309.59    9.92
  -1 -18   2  299.98    9.23
  -1 -18   2  304.88    9.19
   1 -18  -2  305.43    9.16
  -1 -18   1  509.17   13.25
  -1 -18   1  497.67   12.19
   1 -18  -1  486.50   11.57
  -1 -18   1  496.95   12.11
   1 -18  -1  492.24   12.33
  -1 -18   0  770.03   15.94
   1 -18   0  779.91   16.16
  -1 -18   0  780.57   16.01
   1 -18   0  811.93   17.00
   1 -18   1  212.62    8.22
   1 -18   1  208.30    7.30
   1 -18   1  207.51    6.80
  -1 -18  -1  205.45    6.66
   1 -18   1  210.73    7.65
   1 -18   2  998.00   20.85
   1 -18   2 1001.27   19.96
   1 -18   2 1025.56   19.36
   1 -18   2 1012.54   20.46
   1 -18   3 1136.37   22.90
   1 -18   3 1161.57   22.41
   1 -18   3 1188.19   21.81
   1 -18   3 1174.26   22.92
   1 -18   4 1031.74   21.15
   1 -18   4 1042.43   20.79
   1 -18   4 1056.31   20.28
   1 -18   4 1058.73   21.53
   1 -18   5 1416.43   26.54
   1 -18   5 1419.44   26.22
   1 -18   5 1462.33   25.81
   1 -18   5 1466.21   27.06
   1 -18   6  961.54   19.83
   1 -18   6  975.89   19.60
   1 -18   6  968.06   19.21
   1 -18   6  981.22   20.46
   1 -18   7  562.52   13.18
   1 -18   7  570.38   14.13
   1 -18   8 1269.06   23.65
   1 -18   8 1320.50   23.52
   1 -18   8 1316.90   23.38
   1 -18   8 1250.47   23.93
   1 -18   9 1030.92   19.38
   1 -18   9 1042.28   19.32
  -1 -18 -10  895.71   16.74
   1 -18  10  869.82   16.63
   1 -18  10  884.99   16.61
   1 -18  10  873.52   16.58
   1 -18  11  756.10   13.75
   1 -18  11  755.42   13.91
  -1 -18 -11  733.59   13.75
   1 -18  12  509.12   10.48
   1 -18  12  541.53   11.08
   1 -18  13  534.08   10.67
  -1 -19  12 1180.14   19.58
  -1 -19  12 1239.61   19.79
  -1 -19  11  169.01    5.22
  -1 -19  11  169.93    5.54
  -1 -19  11  177.33    5.44
  -1 -19  10 1112.96   19.35
  -1 -19  10 1124.79   19.47
  -1 -19   9  450.17   10.58
  -1 -19   9  454.91   10.59
  -1 -19   8 1341.26   24.07
  -1 -19   7  832.33   16.80
  -1 -19   7  866.13   17.65
  -1 -19   7  810.87   16.43
  -1 -19   6 1239.82   22.93
  -1 -19   6 1243.74   22.65
  -1 -19   5  630.73   14.19
  -1 -19   5  652.23   15.13
  -1 -19   5  611.61   13.78
  -1 -19   4  935.71   18.85
  -1 -19   4  992.83   20.15
  -1 -19   4  952.35   18.61
  -1 -19   3  363.64   10.04
  -1 -19   3  366.25    9.83
  -1 -19   3  384.41   11.10
  -1 -19   2  859.37   17.24
  -1 -19   2  890.13   18.82
   1 -19  -2  818.70   16.46
  -1 -19   2  849.48   16.86
  -1 -19   1  482.05   11.29
  -1 -19   1  485.84   11.55
   1 -19  -1  465.77   11.30
   1 -19  -1  502.12   13.94
  -1 -19   1  512.83   13.30
  -1 -19   0  863.91   16.66
   1 -19   0  882.96   17.23
  -1 -19   0  866.74   16.49
   1 -19   1  236.92    7.53
   1 -19   1  228.23    7.40
   1 -19   1  231.11    6.77
   1 -19   2  433.02   11.05
   1 -19   2  435.79   10.92
   1 -19   2  433.85   10.31
   1 -19   3    8.14    1.76
   1 -19   3    8.72    1.75
   1 -19   3    7.43    1.59
   1 -19   3    8.33    2.06
   1 -19   4  460.82   11.59
   1 -19   4  468.42   11.18
   1 -19   4  469.77   12.31
   1 -19   4  468.12   11.46
   1 -19   5   15.00    2.09
   1 -19   5   15.63    2.07
   1 -19   5   15.18    2.37
   1 -19   5   17.68    2.21
   1 -19   6   95.17    4.73
   1 -19   6  100.48    4.63
   1 -19   6  101.29    5.10
   1 -19   6  106.09    4.74
   1 -19   7   45.08    3.11
   1 -19   7   39.89    2.84
   1 -19   8  140.67    5.27
   1 -19   8  135.14    5.28
   1 -19   9  154.57    5.63
   1 -19   9  157.31    5.51
   1 -19  10    2.98    1.29
   1 -19  11   35.52    2.36
  -1 -20  10    5.23    1.14
  -1 -20  10    5.16    1.40
  -1 -20  10    3.78    1.00
  -1 -20   9    3.17    1.39
  -1 -20   9    1.69    0.99
  -1 -20   8   20.05    2.32
  -1 -20   8   18.38    1.96
  -1 -20   7   79.79    4.37
  -1 -20   7   71.04    3.70
  -1 -20   7   72.66    3.61
  -1 -20   6  153.20    5.67
  -1 -20   6  154.12    5.48
  -1 -20   5  125.23    5.18
  -1 -20   5  126.03    4.99
  -1 -20   4  271.80    8.95
  -1 -20   4  253.88    7.68
  -1 -20   4  251.23    7.36
  -1 -20   3   68.21    4.50
  -1 -20   3   62.08    3.43
  -1 -20   3   59.84    3.56
  -1 -20   2  385.49    9.29
  -1 -20   2  375.97    9.56
  -1 -20   1    3.56    1.25
  -1 -20   1    4.04    1.18
   1 -20   0 1247.64   24.34
   1 -20   1   71.03    4.84
   1 -20   2 1058.12   18.15
   1 -20   3   16.28    1.84
   1 -20   3   14.62    1.99
   1 -20   4 2021.63   31.38
   1 -20   4 2015.19   32.46
   1 -20   5   37.57    2.67
   1 -20   5   38.70    2.89
   1 -20   6 1992.11   31.05
   1 -20   6 2000.12   31.85
   1 -20   7   21.47    2.07
   1 -20   7   22.32    2.16
   1 -20   8 1420.62   23.00
   1 -20   9   31.38    2.25
  -1 -21   8 1681.99   26.13
  -1 -21   8 1745.40   26.53
  -1 -21   7   35.29    2.31
  -1 -21   7   37.54    2.45
  -1 -21   6 1415.04   22.86
  -1 -21   6 1456.11   23.49
  -1 -21   5    9.73    1.46
  -1 -21   5    9.37    1.51
  -1 -21   4  604.47   11.91
  -1 -21   4  627.89   12.64
  -1 -21   3   10.81    1.45
  -1 -21   3   10.36    1.59
  -1 -21   2  851.04   14.75
  -1 -21   2  826.85   15.44
   1 -21   1  136.91    5.84
   1 -21   2  770.81   16.62
   1 -21   3   13.95    2.47
   1 -21   3   10.13    1.33
   1 -21   4  236.29    7.86
   1 -21   4  204.48    5.56
   1 -21   5   51.19    2.66
   1 -21   6  169.96    4.95
   1 -21   7    6.02    1.18
   1 -21   8   50.59    2.98
   1 -21   8   54.70    2.58
   2   0 -21    1.65    1.03
   2   0 -20 1706.54   27.45
   2   0 -19    1.41    1.35
   2   0 -18 1721.34   29.45
   2   0 -17    4.66    1.72
   2   0 -16 3250.03   50.52
   2   0 -15    3.97    1.72
  -2   0  15    2.39    1.39
   2   0 -14 5182.88   75.01
  -2   0  14 5025.55   76.45
   2   0 -14 5262.84   77.16
   2   0 -13    1.66    1.32
  -2   0  13    3.22    1.42
   2   0 -13    1.17    1.18
   2   0 -12 2539.93   40.42
   2   0 -12 2569.88   41.82
   2   0 -11    0.37    1.13
  -2   0  11   23.77    2.46
   2   0 -10 4235.73   60.47
  -2   0  10 4154.17   61.45
   2   0  -9    1.02    0.90
  -2   0   9    0.87    1.07
   2   0  -8 3494.62   49.23
  -2   0   8 3373.42   50.01
   2   0  -7    0.39    0.77
   2   0  -7    0.33    0.68
   2   0  -6 2581.16   36.79
   2   0  -6 2567.08   36.93
   2   0  -5    1.80    0.73
   2   0  -5    1.59    0.71
   2   0  -4 1181.83   17.31
   2   0  -4 1163.32   17.42
   2   0  -4 1134.84   17.39
   2   0  -3   24.02    1.26
   2   0  -2 1690.10   23.47
   2   0  -1    0.91    0.54
  -2   0   0    1.94    0.67
   2   0   0    5.95    0.86
   2   0   1    5.41    0.88
   2   0   1    2.08    0.63
   2   0   1    2.05    0.63
   2   0   1    6.13    0.88
   2   0   2 1416.91   20.15
   2   0   2 1395.04   20.18
   2   0   2 1444.27   19.92
   2   0   3    1.39    0.65
   2   0   3    1.96    0.45
   2   0   4 1379.19   19.81
   2   0   4 1297.69   18.66
   2   0   5    2.47    0.81
   2   0   5    1.65    0.58
   2   0   6 3339.01   45.58
   2   0   7    1.38    0.87
   2   0   7    1.76    0.88
   2   0   7    1.85    0.68
   2   0   8 2609.17   37.79
   2   0   8 2582.35   38.05
   2   0   9    2.72    0.82
   2   0   9    2.59    1.06
   2   0  10 2910.27   43.09
   2   0  10 3129.57   45.67
  -2   0 -11    3.76    1.58
   2   0  11    3.05    1.31
   2   0  12 5136.17   74.28
  -2   0 -12 4969.98   73.45
  -2   0 -13    8.21    1.98
   2   0  13    2.17    1.35
   2   0  14 3066.81   50.41
  -2   0 -14 3165.42   49.56
   2   0  15    1.23    1.36
  -2   0 -15    1.88    1.77
  -2   0 -16 1840.16   32.80
  -2   0 -17    1.96    1.80
  -2   0 -18 1425.35   26.13
  -2   0 -19    5.28    1.74
  -2   0 -20 1059.73   18.66
   2   1 -21    4.97    1.26
   2   1 -20  113.86    4.62
   2   1 -19    8.53    1.81
   2   1 -18   23.45    2.64
   2   1 -17   83.17    4.75
   2   1 -16   29.66    3.11
   2   1 -15  183.59    7.17
  -2  -1  15  175.25    7.60
  -2   1  15  173.46    7.43
  -2   1  14  190.63    7.69
  -2  -1  14  195.16    7.90
   2   1 -14  195.22    7.96
   2  -1 -14  194.82    6.73
   2  -1 -14  188.19    7.34
  -2  -1  13  117.20    5.95
  -2   1  13  114.65    5.74
   2   1 -13  123.93    6.05
   2  -1 -13  110.08    4.94
   2  -1 -13  111.03    5.39
  -2  -1  12 1824.72   31.47
  -2   1  12 1766.74   31.10
   2   1 -12 1764.64   31.07
   2  -1 -12 1817.76   29.35
   2  -1 -12 1773.01   30.23
   2   1 -11  238.08    7.88
  -2   1  11  241.45    7.96
  -2  -1  11  236.73    7.93
  -2   1  10 2470.14   38.65
  -2  -1  10 2425.29   38.62
   2   1 -10 2473.83   37.65
  -2   1   9  294.70    8.23
  -2  -1   9  273.96    7.94
   2   1  -9  295.46    7.64
  -2  -1   8 4749.49   69.33
   2   1  -8 5094.77   68.72
  -2  -1   7 1114.20   19.23
   2   1  -7 1135.07   18.75
   2   1  -7 1180.39   18.74
   2   1  -6 6182.09   83.64
   2   1  -5 1502.45   22.58
   2   1  -5 1531.40   22.54
   2  -1  -3  362.44    6.66
   2   1  -3  373.69    6.31
   2   1  -1  433.58    6.56
   2  -1  -1  393.93    7.32
   2   1   0 3209.38   42.99
   2  -1   1  673.38   10.19
   2   1   1  677.63   10.93
   2   1   1  672.02   10.02
   2  -1   1  647.34   10.88
   2  -1   1  658.44   10.84
   2   1   1  676.98   10.99
   2   1   1  659.67    9.96
   2   1   2 2799.29   36.86
   2   1   3  359.95    6.22
   2  -1   3  345.51    6.57
   2  -1   3  340.60    5.92
   2   1   3  329.24    5.14
   2   1   3  348.18    6.48
   2  -1   5 1754.02   25.35
   2   1   5 1752.76   24.67
   2  -1   7  443.68    8.49
   2   1   7  445.13    8.03
   2   1   7  446.56    9.58
   2  -1   7  455.49    9.59
   2  -1   8 4555.05   62.30
   2   1   8 4408.88   61.54
   2   1   8 4544.85   64.02
   2  -1   8 4691.13   64.32
   2  -1   9  106.26    3.87
   2   1   9  111.14    3.67
   2   1  10 3885.73   56.52
   2  -1  10 3974.92   57.09
   2  -1  11  333.21    8.46
  -2   1 -11  343.19    9.59
   2   1  11  346.79    9.73
   2  -1  11  356.60   10.12
  -2   1 -12 1781.01   30.72
   2   1  12 1789.63   31.31
   2  -1  12 1821.88   31.65
  -2   1 -13   24.94    2.90
   2   1  13   25.40    2.89
   2  -1  13   22.78    2.81
  -2   1 -14   93.52    5.33
   2   1  14   89.47    5.43
   2  -1  14   95.02    5.62
   2   1  15  122.03    6.49
   2  -1  15  120.82    6.61
  -2   1 -16  142.97    6.72
  -2   1 -17   14.29    2.64
  -2   1 -18    5.04    1.99
  -2   1 -19   32.68    2.97
  -2   1 -20   11.62    1.76
   2   2 -21  641.14   12.13
   2  -2 -21  672.81   12.28
   2  -2 -20 1417.01   23.39
   2   2 -20 1395.36   23.28
   2   2 -19  634.44   13.64
   2  -2 -19  643.84   13.71
   2   2 -18 1084.94   20.72
   2   2 -17  464.10   12.03
   2  -2 -16 1664.43   28.21
   2   2 -16 1712.74   29.71
   2  -2 -16 1655.72   29.51
   2  -2 -15  735.04   16.33
   2   2 -15  762.51   16.53
  -2  -2  15  714.12   17.36
   2  -2 -15  740.18   15.57
  -2  -2  14 2398.66   40.54
  -2   2  14 2312.92   40.01
   2  -2 -14 2465.96   38.45
   2  -2 -14 2416.59   39.88
  -2  -2  13  525.97   13.68
  -2   2  13  502.25   13.37
   2  -2 -13  510.59   12.22
   2  -2 -13  516.25   13.47
   2   2 -13  508.45   13.48
   2  -2 -13  516.18   13.07
  -2  -2  12 2409.84   38.93
  -2   2  12 2364.47   38.42
   2  -2 -12 2366.89   37.02
   2   2 -12 2330.28   38.59
   2  -2 -12 2273.33   37.86
   2   2 -11 1776.41   30.21
  -2   2  11 1789.66   30.33
  -2  -2  11 1738.36   30.34
  -2   2  10 1989.30   32.43
  -2  -2  10 1968.92   32.37
   2  -2 -10 1899.09   31.04
   2   2 -10 2026.75   31.46
  -2  -2   9 1238.00   21.86
   2   2  -9 1241.59   21.00
  -2  -2   8 2098.04   32.58
   2   2  -8 2111.05   31.88
  -2  -2   7  220.34    6.27
   2   2  -7  231.30    6.02
   2  -2  -7  223.08    5.89
   2   2  -7  231.24    5.94
   2  -2  -6 3089.14   43.62
   2   2  -6 3095.53   43.68
   2   2  -6 3084.28   43.49
   2  -2  -5  205.03    5.09
   2  -2  -5  211.39    4.99
   2   2  -5  216.82    5.08
   2  -2  -5  196.50    4.83
   2   2  -5  215.53    5.03
   2  -2  -4  112.77    3.37
   2  -2  -4  116.96    3.26
   2   2  -4  118.43    3.30
   2  -2  -4  116.39    3.23
   2   2  -4  120.16    3.30
  -2  -2   3    6.95    0.99
   2  -2  -3    8.96    0.98
   2  -2  -2 1151.56   17.27
   2   2  -1  434.42    6.18
  -2  -2   1  425.11    6.40
  -2  -2   0   21.37    0.82
   2  -2   0   20.34    1.51
   2   2   0   18.20    0.78
   2  -2   1  670.67   11.23
   2   2   1  653.55    9.52
   2  -2   1  649.25   10.84
   2   2   1  662.10   10.91
   2   2   1  668.99   10.99
   2   2   1  663.52    9.49
   2  -2   1  639.59   10.87
   2  -2   1  660.91   11.23
   2  -2   1  641.83   10.35
   2  -2   2 1077.98   16.49
   2   2   2 1079.78   15.12
   2   2   2 1083.97   15.98
   2  -2   2 1067.92   15.95
   2   2   2 1068.42   15.98
   2  -2   2 1053.45   15.96
   2  -2   2 1043.15   15.64
   2  -2   2 1027.62   16.36
   2  -2   3  476.36    8.84
   2  -2   3  478.53    8.42
   2   2   3  500.24    8.51
   2  -2   3  486.26    8.25
   2  -2   3  490.11    8.93
   2  -2   4 1620.58   22.00
   2  -2   4 1604.08   22.92
   2   2   5  660.36    9.94
   2  -2   5  682.69   11.24
   2  -2   6 3502.52   47.34
   2  -2   6 3526.18   48.62
   2  -2   7 1724.92   25.66
   2   2   7 1678.74   24.24
   2   2   7 1675.34   26.57
   2   2   8 1018.44   15.95
   2  -2   8 1042.95   17.26
   2   2   8 1004.38   18.15
   2  -2   9 1463.07   23.63
   2  -2   9 1533.98   25.39
   2  -2  10 1608.22   25.97
   2  -2  10 1651.49   28.05
   2  -2  11 1570.39   27.38
  -2  -2 -11 1487.78   25.57
   2  -2  11 1482.98   24.91
   2   2  11 1489.58   26.45
  -2   2 -11 1537.90   26.37
   2  -2  12 1059.07   21.39
  -2   2 -12 1046.88   20.40
  -2  -2 -12 1052.32   20.38
   2   2  12 1091.70   20.87
  -2  -2 -12 1031.91   19.58
  -2   2 -13  282.53    9.14
  -2  -2 -13  270.33    8.96
   2   2  13  262.27    9.15
  -2  -2 -13  267.24    8.38
   2  -2  13  264.22    9.53
  -2  -2 -14 2003.55   34.47
  -2   2 -14 2018.59   34.60
  -2  -2 -14 1983.03   33.21
   2   2  14 1951.11   35.03
   2  -2  14 2033.31   35.97
  -2  -2 -15 1603.07   29.52
  -2   2 -15 1655.09   29.83
   2   2  15 1601.00   30.12
   2  -2  15 1577.93   30.78
  -2   2 -16 1481.15   27.86
  -2   2 -17 1432.84   26.87
  -2   2 -18 1558.28   27.58
  -2  -2 -18 1506.49   27.26
  -2  -2 -19  423.11   10.71
  -2   2 -19  430.79   10.79
  -2  -2 -20 1326.45   21.96
  -2   2 -20 1324.41   22.01
   2   3 -21   30.21    2.08
   2  -3 -21   29.58    2.05
   2   3 -20   52.03    3.07
   2  -3 -20   53.45    3.09
   2   3 -19   33.95    2.79
   2  -3 -19   35.91    2.87
   2   3 -18    0.12    1.34
   2  -3 -18    1.73    1.49
   2  -3 -17  185.32    6.47
   2  -3 -17  193.27    7.19
   2   3 -17  186.84    7.06
   2  -3 -16    8.01    1.78
   2   3 -16    8.18    2.00
   2  -3 -16    8.22    2.00
  -2  -3  15  339.37   11.21
  -2  -3  15  351.77   11.73
   2   3 -15  360.65   10.42
   2  -3 -15  367.31   10.45
   2  -3 -15  363.93   10.03
   2  -3 -14    8.70    1.90
   2  -3 -14    9.86    2.13
  -2  -3  14   11.68    2.27
  -2   3  14    7.91    1.87
  -2  -3  13  741.87   17.17
  -2   3  13  728.40   16.69
   2  -3 -13  750.05   15.95
   2  -3 -13  748.53   17.03
   2   3 -13  751.06   17.14
   2  -3 -13  748.69   16.92
  -2  -3  12  198.44    7.65
  -2   3  12  186.87    7.21
   2  -3 -12  201.89    6.92
   2   3 -12  200.56    7.57
   2  -3 -12  193.36    7.33
  -2   3  11 1097.70   21.60
   2  -3 -11 1140.01   20.67
   2   3 -11 1131.00   21.53
   2  -3 -11 1114.47   21.40
  -2  -3  10  663.83   14.63
   2   3 -10  679.32   13.78
  -2  -3   9  578.18   12.82
   2   3  -9  585.98   12.10
   2  -3  -9  595.17   12.05
  -2  -3   8 1003.02   18.53
   2  -3  -8 1052.35   17.76
   2   3  -8 1050.05   17.84
   2  -3  -7 1549.00   24.33
   2   3  -7 1575.90   24.31
   2  -3  -7 1583.08   24.24
   2   3  -6 4569.35   62.48
   2  -3  -6 4552.97   62.37
   2  -3  -6 4486.95   62.69
  -2  -3   4 2312.66   33.28
   2   3  -4 2342.31   32.53
   2  -3  -4 2323.31   32.48
   2   3  -4 2352.44   32.52
   2  -3  -4 2340.79   32.49
   2  -3  -1 2197.64   32.14
   2  -3  -1 2329.32   32.88
  -2  -3   0 2647.14   35.33
   2  -3   0 2629.40   37.72
   2  -3   0 2600.30   37.17
   2   3   2 2997.98   41.06
   2   3   2 3019.61   41.02
   2  -3   2 2910.77   41.97
   2  -3   4 3548.67   37.26
   2  -3   4 3365.85   38.30
   2   3   5 4129.46   54.35
   2  -3   6 2014.34   29.33
   2  -3   6 1956.92   28.18
   2  -3   7 2017.40   30.12
   2   3   7 1980.48   30.80
   2  -3   8 2793.60   40.43
   2   3   8 2697.55   41.22
   2  -3   8 2846.18   42.05
   2  -3   9 1007.94   17.82
   2  -3   9 1055.86   19.42
   2  -3  10 1001.38   18.44
   2  -3  10 1063.31   20.28
  -2  -3 -11  839.74   16.79
  -2   3 -11  832.20   16.97
   2  -3  11  850.13   18.17
   2  -3  11  826.88   16.18
   2  -3  12   93.21    4.50
   2  -3  12   84.20    5.09
   2   3  12   86.62    4.73
  -2   3 -12   91.86    4.88
  -2  -3 -12   83.56    4.66
  -2  -3 -12   87.87    4.61
   2  -3  13   15.11    2.52
  -2  -3 -13   14.90    2.38
  -2   3 -13   14.09    2.36
   2   3  13   14.65    2.34
  -2  -3 -13   13.06    2.20
  -2  -3 -14   89.94    5.22
  -2   3 -14   97.10    5.41
  -2  -3 -14   95.28    5.04
   2  -3  14   91.32    5.85
   2   3  14   88.90    5.32
  -2  -3 -15   14.35    2.34
  -2   3 -15   15.88    2.69
  -2  -3 -15   13.59    2.61
  -2  -3 -16  132.31    5.81
  -2  -3 -16  132.18    6.46
  -2   3 -16  133.70    6.49
  -2  -3 -17   26.35    3.08
  -2   3 -17   29.03    3.24
  -2   3 -18    7.19    2.06
  -2  -3 -18    8.80    2.10
  -2  -3 -19   27.32    2.67
  -2   3 -19   27.05    2.69
  -2   3 -20   29.29    2.27
  -2  -3 -20   26.83    2.22
   2   4 -20  261.69    6.91
   2  -4 -20  256.44    6.91
   2   4 -19 1443.87   24.38
   2  -4 -19 1451.31   24.50
   2   4 -18  273.32    8.25
   2  -4 -18  282.95    8.40
   2  -4 -18  265.43    7.56
   2  -4 -17 2161.88   34.97
   2   4 -17 2124.83   34.80
   2  -4 -17 2068.97   33.91
   2   4 -16  137.31    6.05
   2  -4 -16  134.37    5.98
   2  -4 -16  127.77    5.68
  -2  -4  15 2609.51   44.64
   2  -4 -15 2608.02   41.24
  -2  -4  15 2579.55   43.54
   2  -4 -15 2664.50   41.54
   2   4 -15 2680.43   41.62
  -2   4  14  575.74   14.73
  -2  -4  14  609.75   15.70
   2   4 -14  633.60   14.37
   2  -4 -14  616.63   14.27
   2  -4 -14  606.24   15.34
   2  -4 -14  619.47   14.29
  -2  -4  14  623.82   16.26
  -2  -4  13 2780.70   45.06
   2   4 -13 2712.75   44.37
   2  -4 -13 2712.32   44.25
   2  -4 -13 2774.36   43.18
   2  -4 -13 2755.40   44.68
  -2  -4  13 2750.95   45.10
  -2   4  13 2653.10   43.92
   2   4 -12  658.47   15.41
   2  -4 -12  667.77   15.36
   2  -4 -12  677.77   14.74
   2  -4 -12  675.21   15.58
  -2   4  12  646.18   15.28
  -2  -4  12  676.16   15.73
   2   4 -11 2298.94   37.60
   2  -4 -11 2349.99   37.11
   2  -4 -11 2280.01   37.85
  -2  -4  11 2422.51   38.49
  -2  -4  10  353.44    9.90
   2  -4  -9 1382.26   22.93
   2   4  -9 1381.02   22.99
  -2  -4   9 1407.10   24.38
   2  -4  -8   80.35    3.44
   2   4  -8   79.30    3.50
   2   4  -7 1953.42   29.44
   2  -4  -7 1968.23   29.38
   2   4  -6  103.92    3.57
   2  -4  -6  102.12    3.51
   2  -4  -6  102.96    3.48
   2   4  -6  104.22    3.53
   2  -4  -6   99.30    3.79
   2  -4  -5 1804.20   26.22
   2   4  -5 1790.21   26.27
   2  -4  -5 1801.96   26.10
   2   4  -5 1781.15   26.15
  -2  -4   5 1843.36   27.19
   2  -4  -4  164.13    4.03
   2   4  -4  161.16    4.06
   2  -4  -4  168.13    4.04
   2   4  -4  160.88    4.01
  -2  -4   4  173.23    4.65
   2  -4  -4  160.27    4.47
   2  -4  -3  412.40    8.21
  -2  -4   3  435.16    8.02
   2  -4  -2  458.20    8.83
  -2  -4   2  457.31    8.10
   2  -4  -1   61.57    2.88
   2  -4  -1   55.31    2.59
  -2   4   1   58.34    2.69
  -2  -4   1   62.71    1.94
   2  -4   0 1398.11   21.59
   2  -4   0 1391.92   22.15
  -2  -4   0 1436.18   19.86
   2  -4   1  822.83   12.94
   2  -4   1  851.00   14.15
   2   4   2 2796.05   38.75
   2  -4   2 2794.29   38.72
   2   4   2 2798.54   38.81
   2  -4   2 2786.47   38.77
   2  -4   2 2740.62   40.22
   2  -4   2 2818.17   40.29
   2  -4   3  935.27   14.57
   2   4   3  930.84   14.56
   2  -4   3  906.36   14.90
   2  -4   3  927.02   14.52
   2   4   3  944.62   14.56
   2  -4   3  915.93   15.81
   2  -4   3  974.58   15.99
   2  -4   4   83.82    2.88
   2   4   4   83.80    2.88
   2  -4   4   80.86    3.02
   2  -4   4  115.41    3.90
   2  -4   4  121.01    4.02
   2  -4   5  777.13   13.31
   2  -4   5  762.83   14.12
   2  -4   5  792.97   14.26
   2  -4   6  264.19    6.41
   2  -4   6  274.64    7.21
   2  -4   7 2505.10   36.94
   2   4   7 2447.57   37.22
   2  -4   8   25.79    2.04
   2   4   8   29.89    2.31
   2  -4   9 1724.77   27.84
   2  -4   9 1786.23   29.50
  -2   4 -10  421.50   10.41
  -2  -4 -10  426.35   10.68
   2  -4  10  434.21   10.28
   2  -4  10  449.26   11.63
   2  -4  11 1948.84   33.36
  -2  -4 -11 1919.67   31.70
  -2   4 -11 1898.39   31.50
   2  -4  11 1881.34   32.30
   2  -4  11 1877.90   31.05
  -2   4 -12  395.56   10.81
  -2  -4 -12  395.41   10.78
   2  -4  12  401.76   11.95
   2  -4  12  388.63   10.40
  -2  -4 -12  388.75   10.71
  -2  -4 -13 3291.60   50.35
  -2   4 -13 3272.32   50.61
  -2  -4 -13 3280.36   50.61
   2  -4  13 3211.62   52.66
   2  -4  13 3192.76   49.50
   2   4  13 3230.06   50.75
  -2   4 -14  760.01   17.12
  -2  -4 -14  754.82   17.03
   2   4  14  702.45   16.96
  -2  -4 -14  763.56   16.71
  -2   4 -15 4536.36   67.72
  -2  -4 -15 4512.22   67.64
  -2  -4 -15 4440.90   66.65
  -2   4 -16  498.31   13.25
  -2  -4 -16  496.41   13.18
  -2  -4 -16  478.36   12.23
  -2  -4 -17 2225.05   36.79
  -2   4 -17 2268.54   37.07
  -2   4 -18  209.57    7.42
  -2  -4 -18  202.99    7.29
  -2   4 -19 1849.42   29.86
  -2  -4 -19 1845.14   29.81
  -2  -4 -20   81.24    3.35
  -2   4 -20   83.49    3.39
   2   5 -20   52.26    2.84
   2  -5 -20   51.88    2.83
   2  -5 -19   15.82    1.99
   2   5 -19   17.02    2.02
   2  -5 -19   13.81    1.65
   2  -5 -18    2.18    1.30
   2  -5 -18    2.71    1.54
   2   5 -18    1.87    1.42
   2  -5 -17   58.38    3.85
   2   5 -17   56.36    3.74
   2  -5 -17   53.22    3.57
   2   5 -16   60.15    3.95
   2  -5 -16   60.03    3.94
   2  -5 -16   61.47    3.99
   2   5 -15  507.48   12.59
   2  -5 -15  507.90   12.61
  -2  -5  15  484.66   14.76
   2  -5 -15  485.39   12.57
   2   5 -14    4.79    1.78
   2  -5 -14    5.69    1.76
   2  -5 -14    4.85    1.93
  -2  -5  14    4.90    1.81
  -2  -5  14    3.44    1.83
   2  -5 -14    4.88    1.75
  -2   5  14    4.25    1.54
  -2  -5  14    5.14    1.79
  -2  -5  13  373.81   11.47
  -2   5  13  345.31   10.42
   2  -5 -13  362.34   10.35
   2  -5 -13  367.69   11.31
  -2  -5  13  357.77   11.55
   2  -5 -12  117.49    5.65
   2   5 -12  118.30    5.68
   2  -5 -12  122.05    5.54
  -2   5  12  116.50    5.68
  -2  -5  12  130.06    6.20
  -2  -5  12  114.78    5.98
   2  -5 -12  120.59    6.01
   2   5 -11 2146.82   36.10
  -2  -5  11 2251.29   37.11
   2  -5 -11 2255.18   35.95
  -2  -5  11 2254.62   36.77
   2  -5 -11 2210.38   36.85
   2  -5 -10    1.37    1.32
   2  -5 -10    4.88    1.57
  -2  -5  10    1.81    1.16
   2   5  -9 3364.45   48.75
   2  -5  -9 3343.23   48.72
   2   5  -8   12.69    1.47
   2  -5  -8   13.21    1.49
   2  -5  -7 4172.02   58.21
   2   5  -7 4174.27   58.22
   2  -5  -6   21.81    1.64
   2   5  -6   21.75    1.66
   2  -5  -6   24.19    1.68
   2   5  -6   21.56    1.64
   2  -5  -6   20.55    1.85
  -2  -5   6   22.29    1.97
   2   5  -5 3813.22   52.54
   2  -5  -5 3825.30   52.51
   2   5  -5 3800.27   52.44
   2  -5  -5 3817.99   52.43
  -2  -5   5 3804.09   53.69
   2  -5  -4  310.44    6.18
   2   5  -4  316.87    6.20
   2  -5  -4  309.33    6.19
   2   5  -4  312.14    6.23
  -2  -5   4  298.47    5.96
  -2  -5   4  304.85    6.89
  -2  -5   2  614.36   10.43
   2  -5  -2  639.54   12.59
   2  -5   0   35.64    2.14
  -2  -5   0   34.27    1.46
  -2   5   0   30.90    2.22
   2   5   2  226.31    5.23
   2  -5   2  226.83    5.21
   2  -5   2  226.72    5.56
   2   5   2  227.63    5.26
   2  -5   2  232.92    5.29
   2  -5   4   83.66    2.89
   2   5   4   86.33    2.94
   2  -5   4   86.30    3.30
   2  -5   4   84.72    2.89
   2   5   4   83.03    2.88
   2  -5   5 2601.32   37.67
   2  -5   6  343.19    7.87
   2  -5   6  328.17    7.58
   2   5   6  341.22    7.62
   2  -5   7 2959.16   42.99
   2   5   7 2918.01   42.75
   2  -5   8    5.47    1.22
   2   5   8    4.51    1.12
   2  -5   9 4137.03   59.57
   2  -5  10    5.29    1.28
   2  -5  10    5.63    1.61
  -2  -5 -10    5.83    1.57
  -2   5 -10    9.43    1.74
   2  -5  11  857.28   17.97
  -2   5 -11  848.41   17.34
  -2  -5 -11  872.49   17.85
   2  -5  11  887.23   17.53
   2  -5  12    6.26    1.52
   2  -5  12    5.28    2.01
  -2  -5 -12   12.58    2.15
  -2  -5 -12    6.67    1.84
  -2   5 -12    5.93    1.82
  -2   5 -13  590.89   14.21
  -2  -5 -13  580.94   14.16
   2  -5  13  572.07   13.81
  -2  -5 -13  584.50   14.17
   2  -5  13  552.01   14.87
   2   5  13  597.35   14.31
  -2   5 -14   23.54    2.97
  -2  -5 -14   20.96    2.94
   2  -5  14   22.35    2.64
   2   5  14   21.30    2.64
   2   5  14   21.56    2.75
  -2  -5 -14   22.50    2.83
  -2  -5 -15  783.07   17.24
  -2   5 -15  772.10   17.51
  -2  -5 -15  772.69   17.55
  -2  -5 -16   13.46    2.33
  -2   5 -16   13.64    2.55
  -2  -5 -16   12.71    2.43
  -2  -5 -17   26.71    2.72
  -2   5 -17   30.59    3.14
  -2  -5 -17   31.39    3.19
  -2  -5 -18    1.49    1.31
  -2   5 -18    3.43    1.71
  -2  -5 -18    0.12    1.55
  -2   5 -19   20.49    2.18
  -2  -5 -19   18.70    2.12
   2   6 -20   68.80    3.00
   2  -6 -19 1311.70   21.89
   2   6 -19 1361.80   22.37
   2  -6 -19 1387.08   22.52
   2  -6 -18  136.60    5.29
   2   6 -18  134.48    5.26
   2  -6 -18  136.15    5.32
   2  -6 -17 2647.17   41.78
   2  -6 -17 2746.33   41.94
   2   6 -17 2679.18   41.63
   2  -6 -16  272.24    8.74
   2   6 -16  275.16    8.50
   2  -6 -16  277.76    8.61
   2  -6 -15 2105.02   35.57
  -2  -6  15 2224.47   35.52
   2   6 -15 2094.35   34.86
   2  -6 -15 2115.44   35.03
  -2  -6  14  336.98   11.24
   2   6 -14  323.78    9.37
   2  -6 -14  321.56    9.40
  -2  -6  14  339.48   10.24
   2  -6 -14  329.40    9.96
  -2  -6  14  309.50   11.44
  -2  -6  13 3514.09   55.85
  -2  -6  13 3467.43   55.12
  -2   6  13 3206.51   52.91
   2  -6 -13 3428.12   51.97
   2   6 -13 3400.56   51.84
  -2  -6  13 3703.06   54.40
   2  -6 -13 3422.52   54.73
   2  -6 -13 3511.67   53.14
   2  -6 -12  289.60    9.82
   2  -6 -12  291.56    9.20
   2   6 -12  281.10    9.07
  -2   6  12  276.87    9.20
  -2  -6  12  297.02    9.99
  -2  -6  12  288.71   10.03
   2  -6 -12  296.87    9.16
   2  -6 -11 3515.28   54.37
   2   6 -11 3380.16   52.90
   2  -6 -11 3585.35   53.39
  -2  -6  11 3489.15   54.65
  -2  -6  11 3648.15   54.95
  -2  -6  10  210.16    7.49
   2  -6 -10  211.18    7.17
   2  -6 -10  202.74    7.48
  -2  -6   9 2208.12   35.64
   2  -6  -8   37.53    2.37
   2   6  -8   40.73    2.44
  -2  -6   8   37.28    2.78
  -2  -6   7 2088.73   32.22
  -2  -6   7 2089.65   32.94
   2  -6  -7 2083.53   31.01
   2   6  -7 2071.14   30.98
   2   6  -6   26.31    1.75
   2  -6  -6   27.37    1.79
  -2  -6   6   25.71    1.98
   2   6  -6   26.69    1.81
   2  -6  -6   27.58    1.83
   2  -6  -5 1141.17   17.78
   2   6  -5 1149.81   17.76
  -2  -6   5 1180.04   19.34
  -2  -6   5 1115.85   18.15
   2  -6  -5 1139.31   17.86
   2   6  -5 1149.59   17.85
   2   6  -4   15.73    1.20
   2  -6  -4   17.67    1.26
  -2  -6   4   16.46    1.61
  -2  -6   4   18.11    1.38
   2   6  -4   16.88    1.25
   2  -6  -4   18.09    1.29
  -2  -6   4   20.35    1.40
   2   6  -3    9.28    0.90
   2  -6  -3   11.63    0.98
  -2  -6   3   12.04    1.34
  -2  -6   3   15.57    0.96
   2  -6  -3   10.70    0.94
  -2  -6   3   15.12    0.95
   2   6  -3   10.23    0.93
  -2  -6   2  546.43    9.90
   2  -6  -2  558.18    8.93
   2  -6  -1  865.60   15.89
  -2  -6   1  896.36   14.08
  -2   6   1  901.28   16.26
   2  -6   0  424.09    9.11
  -2  -6   0  424.49    7.75
   2  -6   1  302.26    7.06
  -2  -6  -1  320.28    5.97
  -2  -6  -2  167.99    3.21
   2  -6   2  180.29    5.00
   2   6   3  496.63    9.20
   2  -6   3  500.94    9.24
   2  -6   3  523.24   10.09
   2  -6   3  498.32   11.12
   2  -6   3  498.24    9.25
   2   6   3  501.62    9.25
   2  -6   4  239.63    5.59
   2   6   4  239.87    5.62
   2   6   4  245.48    5.63
   2  -6   4  248.32    6.33
   2  -6   4  243.80    5.60
   2  -6   5 1498.91   23.29
   2   6   5 1556.21   23.44
   2   6   5 1573.92   23.50
   2  -6   5 1547.87   23.40
   2  -6   5 1568.79   24.52
   2   6   5 1530.68   23.36
   2  -6   5 1540.74   23.44
   2  -6   6   89.59    3.42
   2   6   6   90.71    3.47
   2  -6   6   89.65    3.86
   2   6   6   90.03    3.51
   2  -6   7 2449.40   36.20
   2   6   7 2306.45   35.30
   2  -6   8  360.84    9.02
   2   6   8  336.63    8.55
   2  -6   9 3489.55   54.09
  -2  -6  -9 3516.93   52.56
   2  -6   9 3571.60   52.46
   2  -6  10  154.43    5.95
   2  -6  10  140.88    5.91
   2  -6  10  137.53    6.47
  -2   6 -10  133.51    5.43
  -2  -6 -10  150.19    6.10
   2  -6  11 2759.14   43.54
   2  -6  11 2752.12   43.80
   2  -6  11 2796.01   45.86
  -2   6 -11 2700.29   42.80
  -2  -6 -11 2801.44   43.18
  -2  -6 -11 2782.38   43.72
   2  -6  12  452.00   11.95
   2  -6  12  448.75   12.43
   2  -6  12  456.13   13.53
  -2   6 -12  455.39   11.86
  -2  -6 -12  482.11   12.19
  -2  -6 -12  469.83   12.36
  -2  -6 -13 3510.58   53.86
   2   6  13 3366.60   53.20
   2   6  13 3582.74   53.96
   2  -6  13 3529.84   53.63
   2  -6  13 3495.52   53.61
   2  -6  13 3302.24   54.29
  -2   6 -13 3506.66   53.50
  -2  -6 -13 3534.78   53.76
   2  -6  13 3346.26   55.94
   2  -6  14  431.59   13.61
   2   6  14  436.22   12.07
  -2   6 -14  463.74   12.46
  -2  -6 -14  465.26   12.53
  -2  -6 -14  456.44   12.42
   2  -6  14  417.35   12.90
   2  -6  14  451.67   12.35
   2   6  14  459.60   12.49
  -2  -6 -15 3151.51   49.92
  -2   6 -15 3212.81   50.26
  -2  -6 -15 3193.86   50.31
  -2  -6 -16  189.71    7.30
  -2   6 -16  190.67    7.48
  -2  -6 -16  199.92    7.65
  -2  -6 -17 1735.83   29.50
  -2  -6 -17 1782.50   30.18
  -2   6 -17 1759.27   30.14
  -2  -6 -18  132.59    5.04
  -2   6 -18  135.24    5.46
  -2  -6 -18  131.09    5.38
  -2   6 -19 1540.29   24.16
  -2  -6 -19 1521.46   24.12
   2  -7 -19   22.65    1.99
   2   7 -19   23.95    2.05
   2  -7 -19   23.46    2.03
   2  -7 -18   27.35    2.49
   2  -7 -18   25.84    2.40
   2   7 -18   28.06    2.45
   2  -7 -17  126.92    5.46
   2   7 -17  124.74    5.17
   2  -7 -17  125.62    5.26
   2  -7 -16    2.61    1.49
   2   7 -16    2.65    1.54
  -2  -7  16    2.57    1.43
   2  -7 -16    2.53    1.63
   2  -7 -15  554.12   13.71
   2   7 -15  539.84   12.81
   2  -7 -15  552.22   13.00
  -2  -7  15  580.98   13.57
   2   7 -14   73.40    4.19
   2  -7 -14   67.94    4.10
  -2  -7  14   76.15    4.77
   2  -7 -14   76.03    4.69
  -2  -7  14   77.58    5.30
  -2  -7  13  623.35   17.51
   2  -7 -13  675.48   16.78
   2   7 -13  653.21   14.29
   2  -7 -13  669.99   14.50
  -2  -7  13  743.56   16.46
  -2  -7  13  671.89   16.93
  -2   7  13  583.80   14.98
   2  -7 -13  674.26   15.60
  -2  -7  12  123.35    6.25
   2  -7 -12  123.40    6.37
  -2  -7  12  119.60    6.36
   2  -7 -12  118.16    5.70
  -2  -7  12  117.40    6.56
   2  -7 -11  804.64   17.94
  -2  -7  11  801.12   18.60
   2  -7 -11  818.15   17.07
   2  -7 -10 1039.12   20.83
  -2  -7  10 1009.14   18.81
   2  -7 -10 1057.91   19.99
  -2  -7   9 1611.44   29.06
  -2  -7   9 1675.81   28.93
  -2  -7   8 1927.31   32.70
  -2  -7   8 2057.01   33.02
   2   7  -7 2398.33   35.64
   2  -7  -7 2476.37   35.78
  -2  -7   7 2410.87   37.85
   2   7  -6 1905.56   28.04
   2  -7  -6 1923.39   28.15
  -2  -7   6 1922.36   30.49
   2  -7  -6 1851.21   29.81
  -2  -7   6 1904.02   29.72
   2  -7  -5 1799.96   26.41
   2   7  -5 1784.59   26.36
  -2  -7   5 1861.69   27.33
   2   7  -5 1751.39   26.17
   2  -7  -5 1814.22   26.30
  -2  -7   5 1837.14   28.60
   2  -7  -5 1650.65   27.90
  -2  -7   5 1918.81   27.66
   2  -7  -4 1729.89   25.06
  -2  -7   4 1787.62   25.23
   2   7  -4 1700.88   25.00
  -2  -7   4 1841.74   25.45
   2   7  -4 1703.33   24.92
   2  -7  -4 1747.39   25.01
   2  -7  -4 1658.46   26.82
  -2  -7   4 1700.97   26.98
  -2  -7   3 9588.48  124.98
   2  -7  -2 4350.05   57.48
   2   7  -2 4291.62   57.43
   2  -7  -2 4385.97   60.55
   2   7  -2 4294.71   57.47
   2  -7  -2 4329.03   57.50
  -2   7   2 4133.50   61.39
  -2  -7   2 4293.50   59.46
  -2   7   1 9999.00  135.53
   2  -7   0 3830.68   56.52
  -2  -7   0 3891.24   54.53
   2  -7   0 3918.41   56.27
   2  -7   1 5212.82   75.79
  -2  -7  -1 5526.10   73.05
   2  -7   2  317.39    8.31
   2  -7   2  308.59    7.35
  -2  -7  -2  290.80    5.29
   2   7   3 1170.57   18.60
   2  -7   3 1153.06   18.52
   2  -7   3 1220.48   21.34
   2  -7   3 1201.19   19.80
   2   7   4  489.18    9.52
   2  -7   4  498.05    9.57
   2  -7   4  512.86   11.85
   2  -7   4  516.91    9.27
   2  -7   4  510.17    9.65
   2   7   4  506.23    9.62
   2   7   4  514.33    9.22
   2   7   5 4656.05   63.62
   2  -7   5 4607.47   63.54
   2  -7   5 4558.87   66.81
   2  -7   5 4619.93   63.44
   2   7   5 4602.23   63.30
   2   7   5 4679.37   63.67
   2  -7   5 4614.83   63.57
   2  -7   6 1116.90   18.41
   2   7   6 1154.43   18.58
   2  -7   6 1097.73   21.07
   2  -7   6 1098.46   18.43
   2   7   6 1102.69   18.37
   2  -7   6 1120.15   18.43
   2   7   6 1165.26   18.65
   2  -7   6 1169.86   19.95
   2  -7   7 5119.51   72.58
   2   7   7 5384.72   72.93
   2   7   7 5431.96   73.03
   2  -7   7 5204.88   74.36
   2  -7   7 5186.42   72.70
   2  -7   7 5188.61   75.89
   2  -7   8  900.64   16.55
   2   7   8  927.34   16.78
   2  -7   8  930.91   17.87
   2  -7   8  921.59   19.09
  -2  -7  -9  989.57   19.33
   2  -7   9  995.75   18.30
   2   7   9 1031.34   18.58
   2  -7   9 1009.73   19.47
   2  -7   9 1008.03   18.58
   2  -7   9 1004.68   20.85
   2  -7   9 1000.67   19.29
   2  -7  10  448.14   11.62
   2  -7  10  444.35   10.84
   2   7  10  459.00   11.07
   2  -7  10  456.77   11.66
   2  -7  10  443.64   12.86
  -2  -7 -10  439.05   11.52
   2  -7  11 1134.07   24.08
   2  -7  11 1135.55   21.46
   2   7  11 1185.32   21.83
   2  -7  11 1139.79   22.29
   2  -7  11 1140.32   22.34
  -2   7 -11 1116.40   21.38
  -2  -7 -11 1186.98   21.85
  -2  -7 -11 1151.49   22.30
   2  -7  12  871.84   20.58
   2   7  12  915.92   18.62
   2  -7  12  891.61   18.28
   2  -7  12  884.82   18.33
   2   7  12  929.98   18.75
   2  -7  12  905.41   19.03
   2  -7  12  858.80   18.97
  -2  -7 -12  863.43   18.44
  -2   7 -12  871.67   18.24
  -2  -7 -12  872.83   18.86
   2  -7  13  259.27   10.35
   2  -7  13  278.11    9.64
   2  -7  13  263.89    8.86
   2   7  13  281.56    9.19
   2  -7  13  268.39    9.18
   2  -7  13  275.44    9.04
  -2  -7 -13  285.76    9.31
  -2   7 -13  281.41    9.15
  -2  -7 -13  280.78    9.42
  -2  -7 -14  311.80    9.88
  -2   7 -14  298.17    9.60
   2  -7  14  287.94   10.22
  -2  -7 -14  303.03    9.87
  -2  -7 -15  266.99    9.05
  -2   7 -15  265.94    8.93
  -2  -7 -15  264.87    8.99
  -2  -7 -16   67.58    4.36
  -2   7 -16   65.63    4.27
  -2  -7 -16   64.98    4.28
  -2  -7 -17   27.15    2.73
  -2  -7 -17   26.60    2.80
  -2   7 -17   29.46    2.85
  -2  -7 -18    0.72    1.24
  -2   7 -18    1.57    1.30
  -2  -7 -18    2.35    1.38
   2  -8 -19  399.59    8.87
   2  -8 -18 1220.04   21.11
   2  -8 -18 1192.88   20.11
   2  -8 -17  877.78   17.51
   2   8 -17  883.01   16.51
   2  -8 -17  895.77   16.69
   2  -8 -16 1886.55   31.58
   2   8 -16 1850.00   30.05
   2  -8 -16 1907.64   30.38
   2  -8 -15 1276.45   24.26
   2   8 -15 1254.17   22.70
   2  -8 -15 1280.87   23.02
  -2  -8  15 1332.34   24.11
   2  -8 -14  990.53   20.38
   2  -8 -14  991.86   19.04
  -2  -8  14 1030.16   20.75
  -2  -8  13  617.59   16.35
   2  -8 -13  590.65   13.41
   2  -8 -13  591.18   14.74
   2  -8 -12  629.07   15.03
  -2  -8  12  651.30   15.90
   2  -8 -12  633.35   16.09
   2  -8 -12  615.92   13.46
   2  -8 -11  927.75   19.01
   2  -8 -11  877.96   17.05
  -2  -8  11  897.49   21.16
  -2  -8  11  907.54   17.91
  -2  -8  10 1610.23   30.58
  -2  -8  10 1651.73   29.48
  -2  -8  10 1651.33   29.87
  -2  -8  10 1588.60   27.40
  -2  -8   9 1523.93   28.41
  -2  -8   9 1572.00   27.98
  -2  -8   9 1483.81   25.84
  -2  -8   8 2207.29   36.17
  -2  -8   8 2168.61   36.53
  -2  -8   7  707.24   15.55
  -2  -8   7  797.55   15.94
  -2  -8   6  908.63   17.70
   2  -8  -6  844.06   16.75
   2  -8  -5  677.74   11.32
   2   8  -5  653.54   11.19
  -2  -8   5  692.13   12.18
  -2  -8   5  680.82   13.79
   2  -8  -5  660.78   13.26
  -2  -8   5  704.54   12.32
   2   8  -4  164.12    3.89
   2  -8  -4  179.00    4.03
  -2  -8   4  168.26    3.71
   2  -8  -4  175.93    4.07
  -2  -8   4  167.53    5.51
   2  -8  -4  166.50    5.38
   2  -8  -3   70.12    4.17
  -2  -8   3   59.17    3.01
   2  -8  -3   61.59    3.18
   2  -8  -3   64.90    2.04
  -2   8   3   62.39    3.64
   2  -8  -3   67.07    2.05
  -2  -8   2 2021.20   31.47
   2  -8  -2 2060.84   32.27
   2  -8  -2 2122.01   28.74
  -2   8   2 2107.40   33.89
   2  -8  -2 2136.26   28.75
  -2  -8   1   44.75    2.48
   2  -8  -1   43.86    2.82
   2   8  -1   41.85    1.33
  -2   8   1   49.51    3.33
   2  -8  -1   44.11    1.34
   2  -8  -1   44.16    1.34
  -2   8   0    9.31    1.70
  -2  -8   0    8.50    1.25
   2  -8   0   10.42    1.71
   2  -8   1  962.58   17.82
   2  -8   1  975.73   18.50
   2  -8   2    7.80    1.41
  -2  -8  -2    7.71    0.87
   2  -8   2   10.45    1.71
   2  -8   3 1507.37   24.64
   2  -8   3 1500.01   26.05
   2  -8   3 1496.40   21.60
   2  -8   4  173.70    4.91
   2   8   4  173.69    4.94
   2  -8   4  185.22    5.96
   2  -8   4  181.26    4.41
   2  -8   5 1016.07   20.01
   2  -8   5  973.94   16.69
   2   8   5 1005.63   16.80
   2   8   5 1017.72   16.85
   2  -8   5 1024.24   16.33
   2  -8   5  995.29   16.77
   2  -8   6  566.19   13.89
   2  -8   6  573.61   11.17
   2   8   6  590.17   11.30
   2   8   6  585.25   11.28
   2  -8   6  581.28   11.20
   2  -8   6  595.84   12.83
   2  -8   6  562.67   10.95
   2   8   7  758.23   14.00
   2  -8   7  724.46   13.75
   2  -8   7  727.02   13.77
   2   8   7  752.82   13.99
   2  -8   7  765.50   15.51
   2  -8   7  718.76   16.64
   2  -8   8 1723.46   28.28
   2  -8   8 1662.98   27.13
   2   8   8 1736.01   27.47
   2  -8   8 1704.44   28.13
   2  -8   8 1677.70   28.61
   2  -8   8 1671.14   30.75
   2  -8   8 1671.48   27.17
   2   8   8 1738.09   27.52
   2  -8   8 1757.92   29.23
   2  -8   9  644.99   13.77
   2  -8   9  637.44   13.85
   2  -8   9  626.67   13.29
   2   8   9  663.01   13.67
  -2  -8  -9  612.28   14.25
   2  -8   9  634.65   14.37
   2  -8   9  622.34   15.98
   2  -8   9  637.67   13.35
   2   8   9  669.06   13.72
   2  -8   9  663.89   14.81
   2  -8  10 1953.47   31.70
  -2  -8 -10 1883.89   32.69
   2  -8  10 1948.09   31.80
   2  -8  10 1927.74   31.46
   2  -8  10 1949.31   32.86
   2  -8  10 1928.53   31.53
   2  -8  10 1960.65   33.26
   2  -8  10 1908.38   35.11
   2  -8  11  599.11   13.42
  -2  -8 -11  591.74   14.53
   2  -8  11  608.82   14.84
   2  -8  11  594.71   13.65
   2  -8  11  595.02   13.63
  -2  -8 -11  619.03   14.13
   2  -8  11  610.93   14.68
   2  -8  11  600.75   13.58
   2  -8  11  585.40   16.16
   2  -8  12 1020.17   23.41
   2  -8  12 1033.63   20.53
  -2  -8 -12 1103.48   21.25
   2  -8  12 1037.95   20.61
   2  -8  12 1076.19   21.90
   2  -8  12 1070.95   21.74
  -2  -8 -12 1065.59   21.70
   2  -8  13  769.81   19.94
  -2  -8 -13  825.18   18.18
   2  -8  13  791.58   18.25
  -2   8 -13  806.71   17.44
  -2  -8 -13  835.97   17.80
  -2  -8 -14 1641.56   29.45
  -2   8 -14 1584.87   28.46
  -2  -8 -14 1629.72   28.85
  -2  -8 -15  923.54   19.10
  -2  -8 -15  888.60   18.48
  -2   8 -15  885.08   18.26
  -2  -8 -16 1003.09   19.55
  -2   8 -16  975.73   19.25
  -2  -8 -16 1040.52   20.15
  -2  -8 -17 1215.78   21.61
  -2  -8 -17 1130.08   20.54
  -2  -8 -18 1035.40   18.33
   2  -9 -19    8.97    1.39
   2  -9 -18   34.19    2.62
   2  -9 -17   32.48    2.82
  -2  -9  16   99.59    4.63
   2  -9 -16  105.95    5.19
  -2  -9  15   68.52    4.23
   2  -9 -15   67.55    4.38
   2  -9 -15   64.39    3.74
  -2  -9  14  104.22    5.55
   2  -9 -14  105.32    5.54
   2  -9 -14  100.58    4.68
  -2  -9  13  291.06    9.83
   2  -9 -13  277.21    9.36
  -2  -9  12  207.73    8.17
   2  -9 -12  187.64    7.53
  -2  -9  12  192.50    7.00
  -2  -9  11 1104.39   23.47
  -2  -9  11 1140.83   22.88
  -2  -9  10 2296.73   38.88
  -2  -9  10 2179.66   36.02
   2  -9 -10 2174.97   38.07
  -2  -9  10 2318.25   38.22
  -2  -9   9  493.13   13.30
  -2  -9   9  475.38   11.75
  -2  -9   9  475.07   12.92
  -2  -9   8 2516.57   40.60
  -2  -9   8 2474.36   38.77
  -2  -9   7  502.14   12.62
  -2  -9   7  539.84   13.06
   2  -9  -6 4593.71   67.81
  -2  -9   6 4955.53   69.36
  -2  -9   5 1536.08   25.78
   2  -9  -5 1475.03   24.94
  -2  -9   4 5382.98   74.81
   2  -9  -4 5223.92   74.35
   2  -9  -3  820.62   17.40
  -2  -9   3  786.62   15.14
   2  -9  -3  793.98   15.09
  -2   9   3  798.14   16.89
   2  -9  -2 5635.21   81.98
  -2  -9   2 5485.59   78.94
  -2  -9   1  583.49   12.03
   2  -9  -1  606.66   12.70
  -2   9   0 4126.92   61.53
   2  -9   0 3996.23   60.02
  -2  -9  -1 1716.84   25.54
   2  -9   1 1546.40   27.35
   2  -9   2 4743.34   63.74
  -2  -9  -2 4960.56   65.70
   2  -9   3  181.57    3.79
   2  -9   3  188.24    6.32
   2  -9   4 6452.22   92.21
   2  -9   4 6487.24   90.42
   2  -9   5  265.09    8.81
   2  -9   5  271.36    8.06
   2  -9   5  252.88    6.43
   2  -9   6 6589.95   92.25
   2  -9   6 6567.29   92.18
   2  -9   6 7266.43   95.52
   2  -9   6 7028.28   97.50
   2  -9   7  658.02   16.20
   2  -9   7  642.63   12.82
   2  -9   7  679.83   14.42
   2  -9   7  639.56   12.78
   2  -9   7  682.43   14.36
   2  -9   7  682.43   14.88
   2  -9   7  679.09   14.12
   2  -9   8 2966.09   45.60
   2  -9   8 2852.80   43.39
   2  -9   8 2911.17   48.32
   2  -9   8 3061.60   45.36
   2  -9   8 2830.34   43.39
   2  -9   8 3041.32   46.28
   2  -9   8 2974.75   44.93
   2  -9   9  136.67    5.98
   2  -9   9  136.37    5.25
   2  -9   9  146.92    6.44
   2  -9   9  143.17    5.88
   2  -9   9  131.55    6.94
   2  -9   9  141.93    5.79
   2  -9  10  752.42   15.93
  -2  -9 -10  740.52   16.69
   2  -9  10  796.42   17.49
   2  -9  10  773.81   16.97
   2  -9  10  711.28   18.57
   2  -9  10  769.05   16.18
   2  -9  11  391.80   10.47
  -2  -9 -11  387.42   11.24
   2  -9  11  380.87   11.36
   2  -9  11  397.32   11.39
   2  -9  11  363.31   12.57
   2  -9  11  382.44   10.45
   2  -9  12  411.39   10.58
  -2  -9 -12  401.02   11.70
   2  -9  12  403.35   11.75
   2  -9  12  376.78   12.98
   2  -9  12  394.48   10.58
   2  -9  12  398.47   11.80
  -2  -9 -13   16.48    2.50
   2  -9  13   13.88    2.58
  -2  -9 -13   16.04    2.63
  -2  -9 -14  228.81    8.02
  -2  -9 -14  234.95    8.56
   2  -9  14  230.28    8.78
  -2  -9 -15    3.35    1.81
   2  -9  15    1.85    2.01
  -2  -9 -15    3.05    1.71
  -2  -9 -16   58.39    3.96
  -2  -9 -17    4.99    1.61
  -2  -9 -18   17.79    1.96
   2 -10 -19   13.05    1.47
   2 -10 -18 1328.26   22.20
   2 -10 -17   42.84    3.10
  -2 -10  17   35.64    2.40
   2 -10 -16 2106.26   34.21
  -2 -10  16 2049.04   32.95
   2 -10 -15   76.72    4.60
  -2 -10  15   67.58    4.16
   2 -10 -14 2366.17   39.56
  -2 -10  14 2432.00   39.50
  -2 -10  13    3.87    1.79
  -2 -10  13    5.97    1.63
   2 -10 -13    4.95    1.85
  -2 -10  12 1424.23   26.16
  -2 -10  12 1462.86   29.44
  -2 -10  11   12.45    2.42
  -2 -10  11   13.19    2.07
  -2 -10  11   12.05    2.47
  -2 -10  10 3450.29   55.40
   2 -10 -10 3410.36   52.86
  -2 -10  10 3536.23   54.22
  -2 -10  10 3395.86   52.30
   2 -10 -10 3362.34   54.31
  -2 -10   9   60.77    4.59
   2 -10  -9   60.92    3.99
  -2 -10   9   58.98    4.33
  -2 -10   9   61.38    3.98
   2 -10  -9   58.84    4.35
  -2 -10   8 2116.35   36.16
  -2 -10   8 2047.11   34.12
  -2 -10   8 2051.43   35.43
  -2 -10   7   15.49    2.34
  -2 -10   7   20.76    2.39
  -2 -10   6  967.38   19.32
  -2 -10   6  993.71   18.90
  -2 -10   5  138.83    5.79
   2 -10  -5  127.77    5.15
  -2 -10   4  509.62   12.05
   2 -10  -4  516.43   11.52
   2 -10  -3    5.37    1.81
  -2 -10   3    5.37    1.32
   2 -10  -3    6.94    1.35
   2 -10  -2  407.23   11.60
  -2 -10   2  395.96    9.91
   2 -10  -2  410.94    9.93
  -2  10   2  429.42   11.70
  -2 -10   1   15.72    1.90
   2 -10  -1   16.75    2.37
  -2 -10   0   16.03    1.84
   2 -10   0   17.10    2.03
  -2 -10  -1   13.53    1.56
   2 -10   1   13.01    1.86
  -2 -10  -2  359.17    7.46
   2 -10   2  382.95   10.31
   2 -10   3    4.16    1.37
   2 -10   3    2.88    1.44
   2 -10   4  479.52   11.88
   2 -10   4  493.57   12.78
   2 -10   5  543.64   13.01
   2 -10   5  569.46   12.65
   2 -10   5  529.80   12.19
   2 -10   5  563.09   14.22
   2 -10   6 1280.60   24.02
   2 -10   6 1323.21   25.79
   2 -10   6 1264.76   22.96
   2 -10   6 1353.79   23.55
   2 -10   7  174.07    6.97
   2 -10   7  175.95    6.54
   2 -10   7  168.56    7.71
   2 -10   7  174.02    6.55
   2 -10   7  166.45    6.28
   2 -10   8 2550.14   40.64
  -2 -10  -8 2512.82   40.90
   2 -10   8 2594.41   42.21
   2 -10   8 2635.68   41.02
   2 -10   8 2573.91   41.18
   2 -10   8 2604.67   44.43
   2 -10   9    7.19    1.83
   2 -10   9    6.82    1.90
   2 -10   9    7.38    1.74
   2 -10   9    9.68    2.39
   2 -10   9    6.92    1.82
  -2 -10  -9    9.34    2.04
   2 -10  10 2332.36   37.53
   2 -10  10 2304.82   37.25
   2 -10  10 2290.91   38.32
   2 -10  10 2267.88   38.94
   2 -10  10 2214.55   41.05
   2 -10  11   74.19    5.63
   2 -10  11   80.57    4.56
   2 -10  11   82.84    4.57
   2 -10  11   78.65    4.97
   2 -10  11   74.74    4.98
  -2 -10 -11   75.94    4.88
   2 -10  12 1888.20   31.59
   2 -10  12 1851.27   32.87
   2 -10  12 1868.27   31.23
  -2 -10 -12 1860.90   32.97
   2 -10  12 1754.62   35.08
   2 -10  13  227.70    7.38
  -2 -10 -13  233.64    8.67
   2 -10  13  214.71    8.43
  -2 -10 -14 1901.84   32.45
   2 -10  14 1749.28   32.23
  -2 -10 -15   70.54    4.48
   2 -10  15   64.97    4.55
  -2 -10 -16 2052.56   33.68
  -2 -10 -17    9.54    1.80
  -2 -10 -18 1544.02   24.42
   2 -11 -18   21.47    2.00
   2 -11 -17    6.57    1.60
  -2 -11  17    4.35    1.10
   2 -11 -16   50.84    3.54
  -2 -11  16   51.99    3.21
  -2 -11  15    3.47    1.53
   2 -11 -15    1.37    1.40
  -2 -11  14  483.53   11.37
  -2 -11  14  492.98   12.01
  -2 -11  14  469.84   12.39
   2 -11 -14  475.09   12.57
  -2 -11  13   54.55    3.77
  -2 -11  13   51.34    4.01
  -2 -11  12 1068.86   21.13
   2 -11 -12 1056.84   21.79
  -2 -11  12 1120.89   22.52
  -2 -11  11  289.76    9.24
   2 -11 -11  290.60    9.60
  -2 -11  11  305.01   10.17
  -2 -11  11  287.29   10.98
  -2 -11  10 1330.41   25.03
   2 -11 -10 1345.21   25.44
  -2 -11  10 1406.84   26.69
  -2 -11  10 1355.27   27.92
  -2 -11   9   18.78    2.49
  -2 -11   9   17.29    2.77
   2 -11  -9   17.93    2.50
   2 -11  -8 2761.62   45.32
  -2 -11   8 2780.68   45.77
  -2 -11   8 2866.79   44.76
  -2 -11   8 2911.26   47.31
   2 -11  -8 2792.22   44.16
  -2 -11   7   22.50    2.59
  -2 -11   7   28.81    3.13
  -2 -11   6 3681.53   56.03
  -2 -11   6 3779.80   54.97
   2 -11  -5    9.90    1.63
  -2 -11   5   12.78    2.06
  -2 -11   5    9.05    1.84
   2 -11  -4 3555.05   52.23
  -2 -11   4 3472.48   53.53
   2 -11  -3  183.36    6.30
   2 -11  -3  190.46    7.95
  -2 -11   3  188.97    6.92
   2 -11  -2 3631.65   56.09
   2 -11  -2 3622.70   52.78
   2 -11  -1   68.61    4.67
   2 -11  -1   72.31    3.98
   2 -11   0 4173.77   66.42
   2 -11   0 4317.86   64.76
  -2 -11  -1   42.67    2.71
   2 -11   1   44.43    3.28
   2 -11   2 5335.31   77.37
   2 -11   3  436.75   11.88
   2 -11   4 2709.36   42.03
   2 -11   4 2730.55   43.51
   2 -11   4 2741.37   44.32
   2 -11   5  422.40   10.83
   2 -11   5  434.22   11.02
   2 -11   5  424.25   11.67
   2 -11   5  444.62   12.61
   2 -11   6 3085.09   48.53
   2 -11   6 3293.94   52.04
   2 -11   6 3209.46   50.17
   2 -11   6 3214.98   48.95
  -2 -11  -7  287.44    8.94
   2 -11   7  287.84    8.84
   2 -11   7  283.05    8.94
   2 -11   7  296.59   10.66
   2 -11   7  297.39    9.74
   2 -11   7  297.29    9.06
  -2 -11  -8 2966.34   47.29
   2 -11   8 2968.15   46.91
   2 -11   8 3004.63   47.52
   2 -11   8 3131.89   51.18
   2 -11   8 3047.38   48.76
   2 -11   8 3059.36   47.39
  -2 -11  -9  721.29   16.75
   2 -11   9  738.33   16.41
   2 -11   9  736.66   16.86
   2 -11   9  769.22   19.43
   2 -11   9  741.49   17.58
   2 -11   9  768.76   16.68
  -2 -11 -10 2271.77   38.47
   2 -11  10 2284.13   39.31
   2 -11  10 2270.13   41.58
   2 -11  10 2298.36   37.71
   2 -11  10 2252.91   37.39
   2 -11  10 2274.11   38.45
   2 -11  11  222.40    9.78
   2 -11  11  238.92    8.19
   2 -11  11  230.05    8.62
   2 -11  11  221.77    7.88
   2 -11  12  700.81   15.55
   2 -11  12  679.35   15.14
   2 -11  12  692.22   16.47
  -2 -11 -13   12.58    2.38
   2 -11  13   11.83    1.99
   2 -11  13   10.66    2.40
  -2 -11 -14   39.45    3.57
   2 -11  14   40.50    3.69
  -2 -11 -15    3.21    1.77
   2 -11  15    3.34    1.81
  -2 -11 -16   22.85    2.51
  -2 -11 -17    3.54    1.39
  -2 -11 -18   15.72    1.57
   2 -11  18   15.61    1.71
   2 -12 -18 1013.16   17.04
   2 -12 -17  507.30   10.79
  -2 -12  17  443.15    9.06
   2 -12 -16 1318.66   23.13
  -2 -12  16 1298.95   21.94
  -2 -12  15  566.31   12.83
  -2 -12  14 1682.47   28.36
  -2 -12  14 1784.82   29.42
  -2 -12  14 1724.34   29.88
  -2 -12  13  835.13   17.38
   2 -12 -13  827.99   18.07
  -2 -12  13  826.42   17.18
  -2 -12  13  837.29   18.16
   2 -12 -12 2704.88   43.86
  -2 -12  12 2699.02   43.17
  -2 -12  12 2718.72   44.37
   2 -12 -11  646.23   15.54
  -2 -12  11  658.83   16.05
  -2 -12  11  650.43   15.23
  -2 -12  10 1135.83   25.18
   2 -12 -10 1120.45   22.21
  -2 -12  10 1138.46   23.08
  -2 -12  10 1085.76   21.95
  -2 -12   9 1581.52   31.25
   2 -12  -9 1519.70   27.77
  -2 -12   9 1562.75   29.01
  -2 -12   9 1543.70   28.15
   2 -12  -8  260.18    8.50
  -2 -12   8  262.52   10.24
  -2 -12   8  255.27    8.73
   2 -12  -7  190.03    7.82
   2 -12  -7  194.08    7.04
  -2 -12   7  194.50    8.46
  -2 -12   7  205.18    7.69
  -2 -12   6 1049.76   20.75
  -2 -12   6 1042.68   20.94
  -2 -12   6 1078.21   22.35
   2 -12  -5  246.96    7.87
  -2 -12   5  237.92    8.89
  -2 -12   5  263.77    8.68
  -2 -12   4  336.38   10.50
   2 -12  -4  347.36    9.44
  -2 -12   3  187.64    7.45
   2 -12  -3  207.16    8.63
   2 -12  -3  193.83    6.73
   2 -12  -2  251.88    9.60
  -2 -12   2  260.42    8.69
   2 -12  -2  256.33    7.86
  -2 -12   1    5.19    1.54
   2 -12  -1    7.13    1.57
   2 -12   0   17.92    2.70
   2 -12   0   20.16    2.32
   2 -12   1  129.08    6.33
   2 -12   1  135.40    5.88
   2 -12   2   46.05    3.78
   2 -12   2   55.24    3.87
   2 -12   3  126.70    6.08
   2 -12   4  743.11   17.46
   2 -12   4  774.27   16.27
   2 -12   5  115.20    6.22
   2 -12   5  110.95    5.25
   2 -12   5  110.28    5.28
   2 -12   5  107.16    5.26
   2 -12   5  114.46    6.93
   2 -12   5  114.28    5.87
  -2 -12  -6 1272.80   23.73
   2 -12   6 1286.33   25.25
   2 -12   6 1274.74   23.92
   2 -12   6 1317.28   26.49
   2 -12   6 1283.47   23.88
  -2 -12  -7   83.93    4.82
   2 -12   7   86.51    5.74
   2 -12   7   87.80    5.32
   2 -12   7   88.44    4.90
   2 -12   7   82.86    4.72
  -2 -12  -8 1430.25   27.02
   2 -12   8 1478.93   27.22
   2 -12   8 1543.76   30.38
   2 -12   8 1474.04   28.41
   2 -12   8 1472.98   26.97
   2 -12   8 1449.12   26.77
  -2 -12  -9  461.33   12.85
   2 -12   9  481.07   12.96
   2 -12   9  485.83   14.96
   2 -12   9  486.54   13.78
   2 -12   9  478.37   12.66
   2 -12   9  468.77   12.41
  -2 -12 -10 1905.28   33.70
   2 -12  10 1922.44   33.70
   2 -12  10 1954.31   36.63
   2 -12  10 1915.31   34.83
   2 -12  10 1871.94   33.01
   2 -12  10 1891.39   32.66
   2 -12  11  797.21   17.36
  -2 -12 -11  809.56   18.30
   2 -12  11  811.05   18.18
   2 -12  11  772.03   16.98
   2 -12  12 1268.93   23.68
   2 -12  12 1257.53   24.75
   2 -12  12 1269.91   23.40
   2 -12  13  326.26   10.29
   2 -12  13  328.45    9.16
  -2 -12 -14 1909.10   32.34
   2 -12  14 1832.55   32.27
  -2 -12 -15  462.59   11.65
   2 -12  15  433.79   11.45
  -2 -12 -16 1568.87   26.17
   2 -12  16 1532.05   27.44
  -2 -12 -17  431.31    9.53
   2 -12  17  419.62    9.78
   2 -13 -17   37.15    2.50
  -2 -13  16   74.55    3.44
  -2 -13  15    5.83    1.53
  -2 -13  14  265.41    8.07
   2 -13 -14  260.95    8.42
  -2 -13  14  254.39    7.47
  -2 -13  14  252.00    8.15
  -2 -13  13  158.45    6.34
   2 -13 -13  161.37    6.68
  -2 -13  13  154.16    6.15
  -2 -13  13  158.63    6.63
   2 -13 -12  148.98    6.57
  -2 -13  12  146.40    6.30
  -2 -13  12  143.76    6.63
   2 -13 -11  769.22   17.21
  -2 -13  11  761.48   16.96
  -2 -13  11  761.50   17.61
   2 -13 -10   46.01    3.74
  -2 -13  10   57.77    4.38
  -2 -13  10   45.88    3.71
  -2 -13   9  984.30   23.28
   2 -13  -9  940.65   19.63
  -2 -13   9  960.49   20.67
  -2 -13   9  958.87   20.07
   2 -13  -8 1018.91   20.44
  -2 -13   8 1078.60   24.42
  -2 -13   8 1034.76   21.27
  -2 -13   7 1572.79   29.21
   2 -13  -7 1506.37   29.20
   2 -13  -7 1591.96   27.57
  -2 -13   7 1618.78   31.66
  -2 -13   7 1580.95   28.73
  -2 -13   6 1490.72   27.48
   2 -13  -6 1420.32   27.69
   2 -13  -6 1446.36   25.50
  -2 -13   6 1481.47   29.48
  -2 -13   6 1522.26   27.51
   2 -13  -5 2011.70   34.11
   2 -13  -5 2074.38   36.12
  -2 -13   5 2108.70   37.64
  -2 -13   5 2128.61   35.43
   2 -13  -4 1662.33   28.51
   2 -13  -4 1676.79   30.36
  -2 -13   4 1637.21   31.03
  -2 -13   4 1648.23   29.12
   2 -13  -3 2483.97   39.74
  -2 -13   3 2584.45   41.07
   2 -13  -3 2421.57   41.67
  -2 -13   3 2593.89   42.60
  -2 -13   2 2618.30   42.20
   2 -13  -2 2678.92   45.69
  -2 -13   2 2805.97   43.93
   2 -13  -2 2497.43   40.94
   2 -13  -1 1530.72   30.63
   2 -13  -1 1481.84   26.78
   2 -13   0 2634.76   46.05
   2 -13   0 2742.95   42.78
   2 -13   1 3304.14   53.63
   2 -13   1 3311.38   50.76
   2 -13   1 3236.01   50.12
   2 -13   2 1626.23   27.81
   2 -13   2 1584.32   28.80
   2 -13   2 1591.98   31.18
   2 -13   2 1592.18   30.36
   2 -13   2 1626.39   28.21
   2 -13   3 2324.36   37.07
   2 -13   3 2228.15   38.75
   2 -13   3 2351.87   41.78
   2 -13   3 2310.39   39.99
   2 -13   3 2404.85   37.82
   2 -13   4 1497.01   26.01
   2 -13   4 1530.60   30.47
   2 -13   4 1450.98   26.33
  -2 -13  -5 1527.97   27.07
   2 -13   5 1514.58   27.09
   2 -13   5 1618.34   32.02
   2 -13   5 1523.89   27.42
   2 -13   5 1515.19   27.29
  -2 -13  -6  993.90   20.02
   2 -13   6  943.84   21.80
   2 -13   6 1000.27   20.08
   2 -13   6 1034.96   24.38
   2 -13   6  973.72   20.06
   2 -13   6  977.52   20.05
   2 -13   6  953.08   21.34
  -2 -13  -7  505.65   13.17
   2 -13   7  500.91   14.87
   2 -13   7  499.93   14.27
   2 -13   7  532.26   16.69
   2 -13   7  505.83   13.08
   2 -13   7  507.78   13.14
  -2 -13  -8 1595.96   29.09
   2 -13   8 1603.88   29.06
   2 -13   8 1624.38   31.84
   2 -13   8 1553.54   30.38
   2 -13   8 1558.15   28.70
   2 -13   8 1580.88   28.68
   2 -13   9  440.88   14.17
   2 -13   9  447.45   12.23
   2 -13   9  442.92   12.44
  -2 -13  -9  440.64   12.45
   2 -13   9  426.87   11.89
   2 -13  10  463.63   12.40
   2 -13  10  449.02   12.70
  -2 -13 -10  445.06   12.71
   2 -13  10  480.11   12.46
   2 -13  11  655.30   15.22
   2 -13  11  658.22   15.83
  -2 -13 -11  644.21   15.87
   2 -13  11  626.28   14.77
   2 -13  12  136.26    5.92
   2 -13  12  137.16    6.45
  -2 -13 -12  133.61    6.44
   2 -13  12  135.19    5.79
   2 -13  13  298.61    8.48
   2 -13  13  295.03    9.49
   2 -13  14   47.61    2.93
   2 -13  14   48.95    4.26
   2 -13  14   46.90    3.69
   2 -13  15  234.85    7.54
  -2 -13 -15  245.38    7.76
   2 -13  15  253.26    8.50
   2 -13  16    4.10    1.49
  -2 -13 -16    5.55    1.50
  -2 -13 -17   29.94    2.06
  -2 -14  16  291.29    6.97
   2 -14 -16  317.31    7.91
  -2 -14  15 1424.89   23.99
   2 -14 -15 1487.66   24.86
   2 -14 -14  519.38   12.17
  -2 -14  14  485.98   11.69
  -2 -14  14  515.86   11.73
  -2 -14  14  473.49   10.81
   2 -14 -13 1564.48   27.09
  -2 -14  13 1495.39   26.80
  -2 -14  13 1520.90   26.41
  -2 -14  13 1494.15   25.94
   2 -14 -12  609.84   14.30
  -2 -14  12  592.64   14.43
  -2 -14  12  596.80   13.96
  -2 -14  12  564.00   13.81
  -2 -14  11  849.88   18.07
  -2 -14  11  816.39   18.41
   2 -14 -11  858.69   18.19
  -2 -14  10  361.66   10.73
  -2 -14  10  342.76   11.04
   2 -14 -10  372.25   10.71
  -2 -14   9 1136.40   22.83
   2 -14  -9 1155.02   22.42
  -2 -14   8  230.97    8.52
  -2 -14   8  234.48   10.52
   2 -14  -8  220.91    7.83
   2 -14  -7  496.23   12.28
   2 -14  -7  468.38   13.49
  -2 -14   7  521.23   15.99
  -2 -14   7  490.94   13.21
  -2 -14   7  511.12   13.67
   2 -14  -6  161.67    6.18
   2 -14  -6  161.68    7.38
  -2 -14   6  157.63    8.26
  -2 -14   6  160.96    7.11
  -2 -14   6  171.66    7.26
  -2 -14   5  377.55   11.18
  -2 -14   5  393.50   13.06
   2 -14  -5  349.68   10.26
   2 -14  -5  377.13   11.61
  -2 -14   4    8.45    2.00
  -2 -14   4   13.39    2.27
  -2 -14   4   11.75    2.46
   2 -14  -4   13.85    2.02
   2 -14  -4   10.09    2.50
   2 -14  -3  301.34    9.15
  -2 -14   3  318.13    9.99
  -2 -14   3  295.18    9.43
   2 -14  -3  308.29   10.46
   2 -14  -2    6.14    1.50
   2 -14  -2    1.67    1.07
  -2 -14   2    4.63    1.71
  -2 -14   2    8.33    1.84
   2 -14  -2    4.14    1.87
   2 -14  -1    7.07    1.60
  -2 -14   1    7.20    1.91
   2 -14  -1   10.31    1.75
   2 -14  -1   14.13    2.35
  -2 -14   1   10.30    1.98
   2 -14  -1    8.71    2.38
  -2 -14   0   26.04    2.79
   2 -14   0   25.95    2.66
   2 -14   0   22.89    2.76
   2 -14   0   23.43    2.48
   2 -14   0   24.80    3.24
   2 -14   0   25.26    2.31
   2 -14   1   22.26    3.14
   2 -14   1   14.71    2.36
   2 -14   1   14.59    2.14
   2 -14   1   14.55    1.93
   2 -14   1   12.88    2.76
   2 -14   1   14.47    2.08
   2 -14   2    3.94    1.65
   2 -14   2    1.69    1.31
   2 -14   2    2.30    1.25
  -2 -14  -2    1.56    1.24
   2 -14   2    4.73    2.09
   2 -14   2    2.67    1.79
   2 -14   2    2.94    1.27
   2 -14   3   95.12    6.29
   2 -14   3   96.00    5.19
  -2 -14  -3   96.92    4.75
   2 -14   3   96.01    5.03
   2 -14   3   88.74    4.66
   2 -14   3   99.26    5.48
   2 -14   3   93.20    5.88
   2 -14   4    5.51    1.89
   2 -14   4    4.29    1.56
   2 -14   4    4.34    1.57
   2 -14   4    6.94    1.86
   2 -14   4    6.98    2.49
  -2 -14  -4    7.29    1.84
   2 -14   5  347.69   10.15
   2 -14   5  312.36   10.83
   2 -14   5  359.88   12.99
   2 -14   5  345.25   10.45
  -2 -14  -5  333.13    9.96
  -2 -14  -6  106.96    5.50
   2 -14   6   89.20    5.78
   2 -14   6   97.72    5.25
   2 -14   6  104.63    7.13
   2 -14   6   99.20    5.43
   2 -14   6   97.53    5.32
  -2 -14  -7  886.90   19.09
   2 -14   7  957.46   23.63
   2 -14   7  811.14   20.31
   2 -14   7  892.65   19.13
   2 -14   7  852.14   20.41
   2 -14   7  904.64   19.12
   2 -14   8  191.18    7.57
   2 -14   8  186.61    7.52
  -2 -14  -8  182.54    7.62
   2 -14   8  211.14   10.32
   2 -14   9  886.56   19.31
   2 -14   9  908.24   19.32
   2 -14   9  906.83   19.68
  -2 -14  -9  908.62   19.78
   2 -14  10  216.58   10.15
   2 -14  10  205.22    7.75
   2 -14  10  205.04    7.71
   2 -14  10  199.96    7.94
  -2 -14 -10  194.00    7.93
   2 -14  11 1682.35   33.92
   2 -14  11 1673.30   29.10
   2 -14  11 1590.62   28.58
   2 -14  11 1649.35   29.67
  -2 -14 -11 1654.38   29.88
   2 -14  12  153.74    8.03
   2 -14  12  153.80    6.21
   2 -14  12  161.14    6.22
   2 -14  12  155.54    6.67
  -2 -14 -12  155.52    6.75
   2 -14  13 1249.54   21.93
   2 -14  13 1222.38   23.32
  -2 -14 -13 1245.22   23.55
   2 -14  14  304.34    7.56
   2 -14  14  333.84   10.07
   2 -14  14  300.09    8.94
  -2 -14 -14  321.86    9.15
   2 -14  15 1375.58   23.95
   2 -14  16  189.74    5.43
   2 -15 -16   25.03    1.92
   2 -15 -15  119.06    4.62
  -2 -15  15  113.24    4.26
  -2 -15  14   23.65    2.04
   2 -15 -14   26.23    2.53
  -2 -15  14   25.43    2.42
  -2 -15  14   22.39    2.33
  -2 -15  13  431.57   10.46
   2 -15 -13  458.41   11.28
  -2 -15  13  461.30   11.04
  -2 -15  13  423.36   11.03
  -2 -15  12   28.31    2.71
   2 -15 -12   27.80    2.86
  -2 -15  12   27.42    2.73
  -2 -15  12   26.82    2.90
  -2 -15  11  786.53   17.17
  -2 -15  11  776.87   17.48
   2 -15 -11  841.68   17.36
  -2 -15  11  792.19   17.08
  -2 -15  10   16.31    2.68
  -2 -15  10   17.37    2.44
   2 -15 -10   15.86    2.42
  -2 -15   9  986.89   20.56
   2 -15  -9 1006.06   20.09
  -2 -15   8  174.57    7.62
  -2 -15   8  165.98    7.10
   2 -15  -8  165.17    6.61
  -2 -15   7 2621.19   43.06
  -2 -15   7 2535.89   42.35
   2 -15  -7 2548.58   40.55
   2 -15  -6   12.61    2.44
  -2 -15   6   10.89    2.29
  -2 -15   6   14.03    2.96
   2 -15  -5 2902.50   48.56
  -2 -15   5 2926.84   47.96
  -2 -15   4    8.26    2.03
  -2 -15   4   12.14    2.35
   2 -15  -4   10.29    2.53
   2 -15  -4   11.74    1.93
   2 -15  -3 3772.64   59.50
  -2 -15   3 3835.20   57.94
  -2 -15   3 3775.49   57.48
   2 -15  -3 3806.44   59.20
   2 -15  -3 3606.23   56.00
   2 -15  -2   14.38    2.06
   2 -15  -2   17.81    2.20
  -2 -15   2   14.94    2.34
   2 -15  -2   14.50    2.63
  -2 -15   2   17.13    2.53
  -2 -15   1 4520.93   66.36
   2 -15  -1 4413.99   64.78
   2 -15  -1 4282.39   64.97
  -2 -15   1 4336.28   65.25
   2 -15  -1 4302.17   68.07
   2 -15   0    9.42    1.63
  -2 -15   0    8.68    1.93
   2 -15   0   11.12    2.61
   2 -15   0    8.35    1.78
   2 -15   0    9.56    2.20
   2 -15   0   13.18    2.82
   2 -15   0    8.60    1.71
   2 -15   1 3339.10   51.12
   2 -15   1 3327.88   52.05
   2 -15   1 3300.52   49.70
  -2 -15  -1 3248.90   51.08
   2 -15   1 3375.70   51.06
   2 -15   1 3460.64   56.70
   2 -15   1 3182.24   54.18
   2 -15   2   46.47    3.84
   2 -15   2   48.90    3.45
  -2 -15  -2   46.32    3.53
   2 -15   2   49.73    3.75
   2 -15   2   62.24    5.19
   2 -15   2   48.74    3.65
   2 -15   2   44.66    4.36
  -2 -15  -3 3541.14   55.19
   2 -15   3 3818.11   56.15
   2 -15   3 3625.08   60.59
   2 -15   3 3941.08   57.85
   2 -15   3 3730.81   61.01
   2 -15   3 3744.41   57.04
   2 -15   4    5.06    2.06
   2 -15   4    6.03    2.40
   2 -15   4    6.20    1.80
   2 -15   4    5.47    1.73
  -2 -15  -5 2837.95   45.84
   2 -15   5 2926.23   46.98
   2 -15   5 2854.04   49.37
   2 -15   5 2968.96   51.30
   2 -15   5 2981.53   46.22
   2 -15   6  183.19    7.54
  -2 -15  -6  171.92    7.10
   2 -15   6  169.02    7.12
   2 -15   6  176.65    9.18
   2 -15   6  172.09    7.05
   2 -15   7 1193.56   23.56
  -2 -15  -7 1155.18   23.09
   2 -15   7 1184.06   23.42
   2 -15   7 1154.84   23.04
  -2 -15  -8  381.94   11.30
   2 -15   8  398.69   14.18
   2 -15   8  372.98   11.13
   2 -15   8  378.76   11.18
   2 -15   9 1014.47   20.82
  -2 -15  -9 1003.48   21.01
   2 -15   9 1022.72   20.84
   2 -15   9 1089.20   25.16
   2 -15   9 1019.63   21.05
   2 -15  10   81.92    4.77
  -2 -15 -10   78.16    4.87
   2 -15  10   80.44    4.69
   2 -15  10   82.99    6.12
   2 -15  10   81.23    4.89
   2 -15  11  625.47   14.21
   2 -15  11  620.56   14.75
  -2 -15 -11  618.14   14.84
   2 -15  11  641.12   17.37
   2 -15  11  638.31   14.43
   2 -15  12    5.00    1.75
  -2 -15 -12    5.91    1.89
   2 -15  12    5.47    2.14
   2 -15  12    6.84    1.70
   2 -15  13  475.91   11.80
  -2 -15 -13  492.73   11.96
   2 -15  13  481.52   12.83
   2 -15  13  486.99   10.72
   2 -15  14    5.60    1.67
   2 -15  14    5.39    1.63
  -2 -15 -14    5.97    1.63
   2 -15  15   56.61    2.96
  -2 -15 -15   71.17    3.43
  -2 -16  15  996.55   16.49
  -2 -16  14   16.51    1.93
  -2 -16  14   19.23    2.04
  -2 -16  14   15.47    1.59
   2 -16 -14   17.94    2.01
  -2 -16  13 1279.15   22.08
  -2 -16  13 1244.24   22.24
  -2 -16  13 1249.92   21.45
   2 -16 -13 1293.19   22.26
  -2 -16  12   64.22    3.82
  -2 -16  12   55.75    3.72
  -2 -16  12   53.11    3.41
   2 -16 -12   59.33    3.74
  -2 -16  11 1396.86   25.02
  -2 -16  11 1338.33   25.43
  -2 -16  11 1379.55   24.91
   2 -16 -10    5.78    1.82
  -2 -16  10    5.84    1.71
  -2 -16  10    4.90    1.78
   2 -16  -9 1201.56   22.38
  -2 -16   9 1173.96   22.94
  -2 -16   8   11.31    2.35
   2 -16  -8   13.69    2.24
  -2 -16   8    9.98    2.15
  -2 -16   7 1555.78   29.01
  -2 -16   7 1533.54   28.29
  -2 -16   6   22.98    2.97
   2 -16  -6   22.03    2.94
  -2 -16   5  246.95    9.03
  -2 -16   5  245.06    8.77
   2 -16  -5  244.41    9.20
   2 -16  -4    6.09    2.40
  -2 -16   4    4.97    1.81
  -2 -16   4    5.99    1.89
  -2 -16   3  261.81    9.21
   2 -16  -3  270.41   10.20
   2 -16  -3  267.55    9.76
  -2 -16   3  263.22    9.07
  -2 -16   2    3.72    1.65
  -2 -16   2    6.41    1.83
   2 -16  -2    3.80    1.95
  -2 -16   1   70.78    4.46
   2 -16  -1   67.61    4.11
  -2 -16   1   72.79    4.50
   2 -16  -1   80.04    6.05
   2 -16  -1   69.08    5.06
   2 -16   0   10.35    1.71
  -2 -16   0   11.46    2.08
   2 -16   0    9.78    1.88
   2 -16   0    9.29    2.29
   2 -16   0   12.30    2.80
   2 -16   0   10.48    2.49
   2 -16   1    7.22    1.59
  -2 -16  -1    5.97    1.68
   2 -16   1    5.57    1.93
   2 -16   1   16.76    3.08
   2 -16   1    5.68    1.66
   2 -16   1   13.62    2.70
  -2 -16  -2   21.70    2.44
   2 -16   2   23.85    2.50
   2 -16   2   23.53    2.89
   2 -16   2   25.53    3.60
   2 -16   2   21.48    2.61
   2 -16   2   22.67    3.31
   2 -16   3  163.66    6.46
   2 -16   3  168.73    6.98
   2 -16   3  160.90    7.09
   2 -16   3  165.52    8.57
   2 -16   3  169.33    8.38
   2 -16   4    2.17    2.20
   2 -16   4    2.63    1.41
   2 -16   4    2.94    1.69
   2 -16   4    2.41    1.56
   2 -16   5  609.60   17.51
   2 -16   5  607.17   14.46
  -2 -16  -6   34.66    3.30
   2 -16   6   32.17    3.33
   2 -16   6   36.20    3.26
   2 -16   6   35.61    4.23
   2 -16   7  820.25   21.02
  -2 -16  -7  764.27   17.22
   2 -16   7  785.10   17.75
   2 -16   7  794.64   17.58
   2 -16   7  795.09   17.45
  -2 -16  -8  302.82    9.79
   2 -16   8  320.13   10.04
   2 -16   8  318.82    9.92
   2 -16   8  335.15   12.38
  -2 -16  -9  888.70   18.86
   2 -16   9  896.65   18.81
   2 -16   9  890.61   18.68
   2 -16   9  953.06   22.14
   2 -16  10   49.63    4.49
  -2 -16 -10   43.97    3.62
   2 -16  10   49.68    3.61
   2 -16  10   46.20    3.48
   2 -16  10   44.83    3.60
  -2 -16 -11 1523.93   27.22
   2 -16  11 1580.67   29.37
   2 -16  11 1565.64   27.26
   2 -16  11 1540.15   26.53
  -2 -16 -12  111.08    5.18
   2 -16  12  107.86    5.56
   2 -16  12  113.81    5.18
   2 -16  12  113.80    4.72
   2 -16  13 1388.78   24.11
   2 -16  13 1402.35   24.08
  -2 -16 -13 1405.05   23.94
  -2 -16 -14   91.25    3.87
   2 -16  14   72.06    3.25
  -2 -17  14  124.96    4.26
   2 -17 -13  448.93    9.83
  -2 -17  13  444.97    9.66
  -2 -17  13  475.74   10.37
  -2 -17  13  469.41   10.44
   2 -17 -12  194.13    6.24
  -2 -17  12  189.08    6.10
  -2 -17  12  190.04    6.31
  -2 -17  12  191.60    6.52
   2 -17 -11  593.30   12.74
  -2 -17  11  566.04   12.74
  -2 -17  11  570.37   12.83
  -2 -17  11  552.81   13.16
  -2 -17  10  347.32    9.87
  -2 -17  10  364.60   10.01
   2 -17 -10  369.84    9.70
   2 -17  -9  622.04   13.54
  -2 -17   9  598.20   14.11
  -2 -17   9  620.15   14.83
  -2 -17   9  588.03   14.19
  -2 -17   8  227.91    8.01
  -2 -17   8  226.18    8.44
  -2 -17   8  218.79    8.03
  -2 -17   7 1346.81   26.02
  -2 -17   6  392.97   11.79
  -2 -17   5 1268.22   24.28
   2 -17  -5 1224.53   24.67
  -2 -17   5 1283.59   25.08
  -2 -17   4  824.34   18.06
   2 -17  -4  807.88   18.68
  -2 -17   4  855.35   18.81
  -2 -17   3 2371.42   39.47
   2 -17  -3 2362.76   40.73
  -2 -17   3 2377.25   40.00
  -2 -17   2  199.75    7.56
   2 -17  -2  201.80    8.71
  -2 -17   2  193.69    7.66
   2 -17  -2  202.00    8.34
  -2 -17   1 1979.75   34.34
   2 -17  -1 2082.99   36.40
  -2 -17   1 2046.23   34.34
  -2 -17   0  242.30    8.11
   2 -17   0  273.90    8.63
  -2 -17   0  263.16    8.49
   2 -17   0  261.57    9.84
   2 -17   1 1702.47   30.82
   2 -17   1 1696.96   29.54
   2 -17   1 1679.60   27.94
  -2 -17  -1 1625.49   28.51
   2 -17   1 1660.45   31.81
   2 -17   2  967.22   20.41
   2 -17   2  980.09   19.60
   2 -17   2  949.30   18.32
   2 -17   3 2070.85   35.44
   2 -17   3 2018.48   34.54
   2 -17   3 2041.82   33.48
   2 -17   4 1278.92   25.07
   2 -17   4 1311.82   24.70
   2 -17   4 1322.72   23.94
   2 -17   5 1974.59   33.81
   2 -17   5 1990.14   33.09
   2 -17   6   94.46    5.07
   2 -17   6   88.48    6.07
   2 -17   7 1336.50   24.33
   2 -17   7 1273.94   24.66
  -2 -17  -7 1226.57   23.62
   2 -17   7 1348.20   24.67
   2 -17   7 1295.12   27.22
   2 -17   8  464.64   12.08
   2 -17   8  471.15   12.30
  -2 -17  -8  455.72   11.97
   2 -17   8  482.25   12.34
   2 -17   8  467.40   14.04
   2 -17   9 1053.49   20.39
  -2 -17  -9 1009.78   20.11
   2 -17   9 1080.75   20.45
   2 -17   9 1021.31   22.28
   2 -17  10  359.87    9.80
  -2 -17 -10  335.85    9.66
   2 -17  10  352.94   10.81
   2 -17  10  359.90    9.70
   2 -17  11  555.15   12.49
  -2 -17 -11  534.70   12.35
   2 -17  11  526.63   12.87
   2 -17  11  551.13   12.00
   2 -17  12  112.24    4.78
   2 -17  12   99.47    4.44
  -2 -17 -12  108.30    4.58
  -2 -17 -13  194.54    5.61
   2 -17  13  201.63    6.07
  -2 -18  13  414.04    8.96
  -2 -18  12  662.98   12.83
  -2 -18  12  683.42   13.24
  -2 -18  12  673.58   13.41
  -2 -18  11  464.88   10.64
  -2 -18  11  484.03   10.91
  -2 -18  10  434.60   10.68
  -2 -18  10  444.97   10.75
  -2 -18   9  650.96   14.35
  -2 -18   9  657.87   14.36
  -2 -18   9  677.96   15.11
  -2 -18   8  574.52   13.52
  -2 -18   8  610.30   14.44
  -2 -18   7  575.07   14.30
  -2 -18   6  646.35   15.51
  -2 -18   6  666.43   15.22
  -2 -18   5  317.16   10.02
  -2 -18   5  318.40    9.74
  -2 -18   4  270.86    9.27
  -2 -18   4  254.35    8.53
   2 -18  -4  248.64    8.82
  -2 -18   4  257.79    8.87
  -2 -18   3   80.29    4.75
  -2 -18   3   77.21    4.58
  -2 -18   3   81.88    5.00
   2 -18  -3   97.05    5.54
   2 -18  -3   88.78    5.23
  -2 -18   2   88.02    4.84
  -2 -18   2   89.32    4.83
  -2 -18   2   90.44    5.18
   2 -18  -2   82.22    5.10
   2 -18  -2  102.98    5.97
   2 -18  -1   67.31    4.69
   2 -18  -1   66.24    4.97
  -2 -18   1   61.04    3.95
  -2 -18   1   63.94    4.03
   2 -18   0  120.72    6.30
  -2 -18   0  115.75    5.15
  -2 -18   0  111.54    5.21
   2 -18   1    3.51    1.33
  -2 -18  -1    2.47    1.33
   2 -18   1    4.71    1.58
   2 -18   1    1.28    1.64
   2 -18   2  194.57    7.33
   2 -18   2  196.45    6.66
   2 -18   2  187.33    8.12
   2 -18   3  181.51    7.57
   2 -18   3  187.54    7.23
   2 -18   3  188.09    6.69
   2 -18   3  182.83    8.13
   2 -18   4  214.95    8.16
   2 -18   4  220.86    7.90
   2 -18   4  216.71    7.33
   2 -18   4  210.63    8.83
   2 -18   5  513.86   13.42
   2 -18   5  541.18   13.27
   2 -18   5  523.55   12.49
   2 -18   6  167.19    7.75
   2 -18   6  189.52    6.84
   2 -18   7  585.93   14.04
   2 -18   7  605.65   13.57
   2 -18   8  661.47   14.75
   2 -18   8  675.77   14.70
   2 -18   8  669.51   14.41
   2 -18   8  630.22   15.60
   2 -18   9  443.12   10.83
   2 -18   9  419.00   11.42
   2 -18   9  440.22   10.91
  -2 -18 -10  672.90   13.30
   2 -18  10  680.07   13.79
   2 -18  11  622.87   12.41
   2 -18  11  520.03   11.25
   2 -18  12  814.29   15.00
  -2 -19  11  108.10    4.22
  -2 -19  11  108.63    4.10
  -2 -19  10  804.18   15.78
  -2 -19  10  796.70   15.21
  -2 -19  10  796.48   15.15
  -2 -19   9  155.44    6.06
  -2 -19   9  152.75    5.58
  -2 -19   9  145.70    5.50
  -2 -19   8  506.90   12.49
  -2 -19   7  197.33    7.38
  -2 -19   7  181.40    6.68
  -2 -19   6 1093.52   21.49
  -2 -19   6 1044.11   20.03
  -2 -19   6 1057.42   20.47
  -2 -19   5  107.52    5.64
  -2 -19   5   97.14    4.83
  -2 -19   5   96.13    4.93
  -2 -19   4 2174.48   36.20
  -2 -19   4 2139.95   35.22
  -2 -19   4 2087.18   34.52
  -2 -19   3  393.63   11.21
   2 -19  -3  395.91   10.92
  -2 -19   3  393.75   10.66
  -2 -19   3  398.63   10.49
   2 -19  -2 1404.56   26.27
  -2 -19   2 1436.19   25.60
  -2 -19   2 1453.98   25.43
   2 -19  -1 1014.34   20.92
   2 -19  -1  947.86   19.79
  -2 -19   1  953.12   18.52
  -2 -19   1  972.00   18.61
   2 -19   0 2026.97   35.19
   2 -19   0 2001.65   34.09
  -2 -19   0 1946.46   31.75
   2 -19   1  696.26   15.87
  -2 -19  -1  636.84   13.29
   2 -19   2 1976.18   34.12
   2 -19   2 1970.98   31.04
   2 -19   3  302.02    9.89
   2 -19   3  310.43    8.38
   2 -19   4 1973.22   34.59
   2 -19   4 2058.75   32.44
   2 -19   5  370.83   10.09
   2 -19   5  365.89    9.43
   2 -19   6  754.74   16.90
   2 -19   6  826.05   15.97
   2 -19   7  401.56   10.89
   2 -19   7  458.55   10.62
   2 -19   8  792.74   16.31
   2 -19   8  901.63   16.47
   2 -19   9   45.21    2.81
   2 -19   9   57.03    3.25
   2 -19  11   56.08    2.77
  -2 -20  10  895.35   15.61
  -2 -20  10  891.54   15.54
  -2 -20  10  906.69   16.07
  -2 -20   9   18.95    1.89
  -2 -20   9   15.38    2.00
  -2 -20   8  323.74    8.39
  -2 -20   8  343.31    9.19
  -2 -20   7   12.55    1.80
  -2 -20   7   10.88    1.71
  -2 -20   7   11.75    2.13
  -2 -20   6  412.06    9.99
  -2 -20   6  412.51   10.27
  -2 -20   6  422.69   11.16
  -2 -20   5   49.93    3.21
  -2 -20   5   48.62    3.29
  -2 -20   5   52.11    3.83
  -2 -20   4  180.39    6.22
  -2 -20   4  191.01    7.10
  -2 -20   4  183.52    6.49
  -2 -20   3   15.76    2.02
  -2 -20   3   12.84    1.86
  -2 -20   2   10.22    1.74
  -2 -20   2   12.80    1.84
   2 -20  -2   10.22    1.81
  -2 -20   1   15.48    1.89
   2 -20  -1   12.85    2.24
   2 -20  -1    9.86    1.89
  -2 -20   1   10.83    1.63
   2 -20   0    5.08    1.93
   2 -20   0    3.84    1.51
  -2 -20   0    4.30    1.22
   2 -20   1  107.13    5.51
   2 -20   1  101.53    4.90
   2 -20   2   35.52    3.01
   2 -20   2   34.68    3.36
   2 -20   3    1.53    1.64
   2 -20   3    2.14    1.36
   2 -20   3    2.70    1.17
   2 -20   4  378.43    8.85
   2 -20   4  365.47    9.65
   2 -20   5  154.74    5.23
   2 -20   5  146.64    5.51
   2 -20   6  291.04    7.41
   2 -20   6  242.76    7.04
   2 -20   7    2.92    1.07
   2 -20   7    5.60    1.36
   2 -20   8  417.87    9.23
   2 -20   9   21.38    2.07
   2 -20   9   23.10    1.88
  -2 -21   8 1273.05   20.39
  -2 -21   8 1234.19   20.11
  -2 -21   7   11.35    1.54
  -2 -21   7   14.52    1.64
  -2 -21   6 1406.63   23.35
  -2 -21   6 1431.28   22.95
  -2 -21   5   14.67    1.79
  -2 -21   5   15.10    1.73
  -2 -21   4 1529.60   25.11
  -2 -21   4 1554.92   24.75
  -2 -21   3   41.97    2.73
  -2 -21   3   49.06    2.82
  -2 -21   2 1495.94   23.74
  -2 -21   1   21.56    1.80
   2 -21   0 2030.28   31.61
   2 -21   1   11.70    1.98
   2 -21   1    9.13    1.46
   2 -21   2 1677.98   28.06
   2 -21   3   67.57    4.01
   2 -21   4 1155.27   21.02
   2 -21   5  200.38    6.47
   2 -21   5  171.36    4.89
   2 -21   6 1841.51   29.34
   2 -21   7   27.39    2.20
   3   0 -21    0.36    0.93
   3   0 -20  742.39   14.45
   3   0 -19    1.30    1.37
   3   0 -18  820.15   16.98
   3   0 -17    1.80    1.55
   3   0 -16 1531.69   27.58
  -3   0  15    5.01    1.92
   3   0 -15    2.44    1.60
   3   0 -15    3.50    1.59
  -3   0  14  947.85   21.33
   3   0 -14  894.49   18.74
   3   0 -14  923.08   20.19
   3   0 -13    2.66    1.41
  -3   0  13    2.95    1.67
   3   0 -13    1.85    1.40
   3   0 -13    3.45    1.39
   3   0 -12 3059.12   46.43
   3   0 -12 3031.38   48.56
   3   0 -12 3094.11   47.63
   3   0 -11    2.66    1.32
   3   0 -11    0.72    1.23
   3   0 -11    1.09    1.05
  -3   0  11    2.00    1.36
  -3   0  10 9624.96  133.68
  -3   0   9    4.12    1.57
   3   0  -9    1.39    0.94
   3   0  -8 4199.51   59.56
   3   0  -7    4.44    1.07
   3   0  -6 4549.29   63.06
   3   0  -5    1.47    0.83
   3   0  -4 4289.45   58.61
   3   0  -3    1.35    0.72
   3   0  -1    2.47    0.76
  -3   0   1    5.14    0.86
  -3   0   0 5674.51   76.10
   3   0   1    1.09    0.70
   3   0   1    4.51    0.72
   3   0   2 1079.18   17.64
   3   0   2 1091.08   16.91
   3   0   2 1097.26   17.73
   3   0   2 1121.38   17.04
   3   0   2 1075.81   15.92
   3   0   3    6.97    0.98
   3   0   3    1.33    0.78
   3   0   3    5.84    0.94
   3   0   3    1.67    0.86
   3   0   4 2611.06   36.90
   3   0   4 2541.78   36.40
   3   0   4 2570.56   36.47
   3   0   4 2488.85   34.73
   3   0   4 2606.55   36.97
   3   0   5    1.24    0.74
   3   0   5    1.19    0.78
   3   0   6   42.32    2.52
   3   0   6   42.45    1.77
   3   0   6   44.51    2.50
   3   0   7    0.86    0.81
   3   0   7    0.88    0.52
   3   0   8    8.19    1.41
   3   0   9    0.46    0.99
   3   0  10  475.11   11.76
  -3   0 -10  488.95   12.11
   3   0  11    1.07    1.11
  -3   0 -11    2.44    1.60
   3   0  12   18.08    2.45
   3   0  12   21.67    2.62
  -3   0 -12   18.95    2.75
  -3   0 -13    0.79    1.71
   3   0  13    3.99    1.62
   3   0  13    0.24    1.10
   3   0  13    0.16    1.12
  -3   0 -14  189.62    8.00
   3   0  14  185.66    7.98
   3   0  14  184.58    7.86
   3   0  14  181.67    7.73
  -3   0 -15    2.95    2.03
  -3   0 -16 2037.39   35.85
  -3   0 -17    1.55    1.92
  -3   0 -18 1193.26   22.90
  -3   0 -19    2.68    1.52
  -3   0 -20  514.38   10.19
   3   1 -21  126.37    4.20
   3   1 -20  949.51   17.25
   3   1 -19  222.73    7.20
   3   1 -18 1240.16   22.84
   3   1 -17   14.92    2.34
   3   1 -16  308.20    9.55
   3  -1 -15    4.18    1.47
  -3   1  15    4.53    1.87
  -3  -1  15    4.70    1.86
   3   1 -15    5.05    1.79
   3  -1 -15    3.57    1.57
   3  -1 -14  177.72    7.13
  -3  -1  14  184.31    8.39
  -3   1  14  184.24    8.24
   3   1 -14  176.53    7.63
   3  -1 -14  185.47    6.65
   3  -1 -13    5.05    1.52
  -3   1  13    5.02    1.85
  -3  -1  13    6.70    2.01
   3   1 -13    5.95    1.52
   3  -1 -13    4.57    1.62
   3   1 -13    6.00    1.76
   3   1 -12  328.96   10.13
   3  -1 -12  332.61    9.23
  -3   1  12  353.42   11.19
  -3  -1  12  363.96   11.45
   3   1 -12  333.65    9.46
   3  -1 -12  341.43    9.95
   3   1 -11   10.71    1.70
   3   1 -11    8.43    1.76
   3  -1 -11   10.65    1.85
  -3   1  11    9.85    2.12
  -3  -1  11    7.97    1.94
   3   1 -10  127.87    5.17
  -3  -1  10  123.43    6.01
  -3   1  10  133.51    6.25
   3   1  -9   86.38    3.98
  -3  -1   9   83.37    4.65
   3   1  -8  113.23    4.37
   3   1  -7  607.53   11.74
   3   1  -6  483.94    9.55
   3   1  -6  461.27    9.52
   3   1  -5   43.32    2.28
   3  -1  -5   53.30    2.58
   3   1  -4 3353.07   45.83
   3  -1  -4 3286.25   46.48
   3  -1  -3  415.09    8.16
   3   1  -3  426.41    7.57
   3  -1  -2 1712.85   25.91
   3   1  -2 1813.56   25.09
   3   1  -1   11.59    1.01
   3  -1  -1   12.79    1.25
  -3   1   1    9.05    1.10
  -3  -1   1   12.31    1.02
   3   1   0 4250.04   58.60
  -3   1   0 4540.15   59.62
   3  -1   1   98.99    3.02
   3   1   1   95.96    2.85
   3   1   2 5060.44   69.70
   3  -1   2 5076.67   69.24
   3   1   2 5108.75   68.37
   3  -1   3 1409.91   20.24
   3  -1   3 1427.17   21.59
   3   1   3 1460.06   20.92
   3   1   3 1434.23   21.77
   3   1   3 1417.26   20.79
   3   1   3 1443.32   21.81
   3  -1   3 1384.93   21.41
   3  -1   4 6646.77   89.93
   3  -1   5 1018.30   16.68
   3   1   5  976.29   15.92
   3   1   5 1019.48   16.56
   3   1   5 1011.29   16.61
   3  -1   5  977.54   14.95
   3  -1   6 4593.96   64.62
   3   1   6 4627.30   64.01
   3  -1   6 4548.81   62.61
   3   1   6 4784.28   64.61
   3  -1   7  242.98    6.83
   3   1   7  248.18    6.55
   3   1   7  251.17    6.84
   3  -1   7  245.09    5.65
   3   1   8 4555.58   64.00
   3  -1   8 4636.94   64.59
   3  -1   8 4419.04   62.08
   3   1   9  621.39   13.33
   3  -1   9  642.95   13.76
   3   1  10 4375.07   64.37
   3  -1  10 4400.26   64.87
  -3   1 -10 4464.79   64.93
   3  -1  11  581.78   14.31
   3   1  11  605.30   14.08
   3   1  11  616.92   14.40
  -3  -1 -11  572.66   13.25
  -3   1 -11  625.26   14.54
  -3   1 -12 4775.18   70.49
   3   1  12 4742.59   70.34
   3   1  12 4719.50   70.20
   3  -1  12 4624.59   70.68
   3   1  13   76.97    4.87
   3  -1  13   82.56    5.24
   3   1  13   79.43    4.88
  -3   1 -13   84.38    5.22
   3   1  13   84.43    5.09
   3  -1  14  986.37   21.77
   3   1  14  970.82   21.05
   3   1  14  984.88   21.11
   3   1  14  955.16   21.06
  -3   1 -14  980.12   21.20
  -3   1 -15  145.00    7.05
  -3   1 -16  942.66   20.57
  -3   1 -17  303.01   10.06
  -3   1 -18  610.50   14.47
  -3   1 -19  118.62    5.19
  -3   1 -20  359.04    7.92
   3   2 -21  201.93    5.38
   3  -2 -21  195.94    5.30
   3   2 -20  405.92    9.49
   3  -2 -20  408.04    9.49
   3  -2 -19  193.15    6.58
   3   2 -19  187.56    6.46
   3   2 -18  823.97   16.95
   3   2 -17  425.35   11.32
   3  -2 -17  412.14   10.20
   3   2 -16 1029.54   20.50
   3  -2 -16 1014.89   19.43
   3   2 -15 1045.26   21.93
   3  -2 -15 1025.22   21.82
   3  -2 -15 1017.00   19.75
   3  -2 -15 1022.51   21.15
  -3   2  15  968.70   22.43
  -3  -2  15 1064.72   23.29
   3  -2 -14 1306.46   25.64
   3   2 -14 1320.53   25.71
   3  -2 -14 1297.87   23.76
   3  -2 -14 1284.41   24.90
  -3  -2  14 1321.39   27.18
  -3   2  14 1309.96   26.77
   3   2 -13  858.67   19.19
   3  -2 -13  889.62   19.27
   3  -2 -13  893.63   17.92
   3  -2 -13  869.88   18.74
  -3   2  13  897.54   20.47
  -3  -2  13  906.94   20.83
   3   2 -12 2213.61   37.49
   3  -2 -12 2216.93   37.50
  -3   2  12 2323.23   39.40
   3  -2 -12 2223.34   36.23
   3  -2 -12 2229.35   37.16
  -3   2  11 1940.70   34.37
   3  -2 -11 1875.30   32.12
   3   2 -11 1863.14   32.32
   3  -2 -11 1895.32   31.42
   3   2 -11 1911.09   31.57
   3   2 -10 3767.42   55.42
   3  -2 -10 3679.50   55.19
   3  -2  -9 2339.12   36.78
   3   2  -9 2503.24   37.17
   3   2  -8 3587.38   51.63
   3   2  -7 2869.21   41.68
  -3  -2   6 4878.16   68.26
   3   2  -6 4766.82   66.29
  -3  -2   5 2059.50   30.67
   3  -2  -5 2014.93   29.79
   3  -2  -5 1937.50   29.14
   3   2  -5 1907.33   29.09
   3   2  -5 1984.00   29.16
   3  -2  -3 1906.73   28.29
   3  -2  -2 4097.87   56.61
  -3   2   1  918.41   15.61
   3   2  -1  926.94   14.03
   3  -2  -1  940.40   15.78
   3   2   0 1186.01   17.48
   3  -2   0 1267.79   19.22
  -3   2   0 1312.17   19.33
   3  -2   0 1204.19   18.93
   3  -2   1   90.25    3.33
   3  -2   1   88.40    3.03
   3  -2   2  734.31   13.20
   3   2   2  762.87   13.31
   3   2   2  759.52   11.80
   3  -2   2  742.74   13.19
   3   2   2  774.59   11.89
   3   2   2  757.04   13.27
   3  -2   2  780.29   12.39
   3   2   3  332.35    7.28
   3  -2   3  303.19    7.20
   3   2   3  328.33    6.26
   3  -2   3  312.78    7.27
   3   2   3  320.04    6.25
   3   2   3  331.28    7.23
   3  -2   3  308.93    6.31
   3  -2   4 1311.32   21.44
   3   2   4 1350.68   20.21
   3  -2   4 1359.26   21.59
   3   2   4 1392.14   21.31
   3   2   4 1376.19   21.33
   3  -2   4 1319.87   20.08
   3  -2   5 1234.40   20.75
   3  -2   5 1308.38   21.01
   3   2   5 1272.09   19.65
   3   2   5 1279.76   20.43
   3   2   5 1275.25   20.46
   3  -2   5 1265.47   19.34
   3   2   6  552.57   10.47
   3  -2   6  568.77   11.61
   3   2   6  542.23   10.93
   3   2   6  547.58   11.01
   3  -2   6  547.32   10.04
   3   2   7   18.39    1.78
   3  -2   7   20.98    1.62
   3   2   7   15.74    1.61
   3  -2   7   17.01    1.86
   3  -2   8    5.44    1.02
   3   2   8    6.65    1.28
   3  -2   8    6.90    1.44
   3  -2   9  132.19    4.55
   3   2   9  142.89    5.37
   3  -2   9  136.96    5.65
   3  -2  10   54.05    4.44
   3  -2  10   62.40    3.83
   3   2  10   65.47    3.86
   3   2  10   66.72    3.83
   3  -2  10   62.05    4.05
  -3  -2 -10   70.10    3.92
  -3   2 -10   64.98    4.08
   3  -2  11  218.57    7.74
   3   2  11  212.29    7.57
   3  -2  11  206.80    7.90
   3   2  11  206.57    7.36
  -3  -2 -11  202.62    7.14
  -3   2 -11  208.65    7.70
  -3  -2 -11  207.27    7.63
   3   2  12   26.97    2.80
   3  -2  12   27.40    2.87
  -3   2 -12   25.86    3.02
  -3  -2 -12   28.72    3.13
   3   2  12   17.45    2.40
   3  -2  12   30.39    3.24
  -3  -2 -12   23.70    2.68
   3  -2  13   44.83    3.70
   3   2  13   39.76    3.48
   3  -2  13   40.96    3.58
   3   2  13   41.54    3.59
  -3  -2 -13   40.85    3.76
  -3   2 -13   44.27    3.92
   3   2  13   40.53    3.53
   3  -2  13   45.46    4.06
  -3  -2 -13   43.37    3.55
   3   2  14  211.14    8.32
   3  -2  14  201.11    8.16
   3  -2  14  200.25    8.78
   3   2  14  203.96    8.19
   3  -2  14  211.69    8.35
   3   2  14  207.95    8.28
  -3   2 -14  209.72    8.46
  -3  -2 -14  206.76    8.31
  -3  -2 -14  205.42    7.69
  -3   2 -15  657.18   16.42
  -3   2 -16  235.48    8.95
  -3   2 -17   91.95    5.44
  -3   2 -18 1134.75   21.66
  -3  -2 -18 1073.56   21.27
  -3   2 -19  287.64    8.23
  -3  -2 -19  284.67    8.13
  -3  -2 -20  619.40   11.30
  -3   2 -20  618.49   11.31
   3   3 -20  309.08    7.83
   3  -3 -20  309.14    7.82
   3  -3 -19  746.09   15.15
   3   3 -19  760.57   15.18
   3  -3 -18  383.62    9.36
   3   3 -18  397.33   10.39
   3  -3 -18  401.48   10.50
   3  -3 -17  891.16   17.52
   3   3 -17  909.35   18.47
   3  -3 -17  915.41   18.55
   3  -3 -16  305.03    9.06
   3   3 -16  316.58    9.60
   3  -3 -16  318.38    9.66
  -3  -3  15  708.93   18.56
   3  -3 -15  744.08   16.03
   3  -3 -15  755.26   17.39
   3  -3 -14  520.09   13.80
   3  -3 -14  519.27   12.83
  -3  -3  14  520.26   15.11
  -3   3  14  517.92   14.90
   3   3 -14  521.52   14.04
   3  -3 -14  544.77   14.23
   3  -3 -13   43.53    3.69
   3  -3 -13   44.60    3.45
  -3  -3  13   44.74    4.19
  -3   3  13   43.35    4.02
   3   3 -13   51.94    3.97
   3  -3 -13   51.78    4.00
   3  -3 -12  293.57    9.46
   3   3 -12  290.30    9.47
   3  -3 -12  298.25    9.53
   3  -3 -12  299.66    9.00
  -3  -3  12  310.11   10.71
  -3   3  12  309.75   10.55
  -3  -3  11    9.05    2.06
   3  -3 -11    7.75    1.82
   3  -3 -11    5.13    1.31
   3   3 -11    5.72    1.35
   3   3 -11    5.95    1.68
   3  -3 -10    1.82    1.00
   3   3 -10    2.62    1.13
   3  -3  -9    5.40    1.25
   3   3  -9    5.98    1.28
   3   3  -8    4.82    1.19
   3  -3  -8    4.97    1.18
   3  -3  -7  428.18    9.31
   3   3  -7  433.46    9.38
  -3  -3   7  459.58   10.76
   3   3  -6   18.18    1.62
   3  -3  -6   17.19    1.59
   3  -3  -6   23.24    2.07
  -3  -3   6   18.26    2.03
   3  -3  -5 1240.81   19.27
   3   3  -5 1213.48   19.24
  -3  -3   5 1266.36   20.66
   3  -3  -5 1247.25   20.25
   3  -3  -5 1186.39   19.23
   3   3  -5 1177.13   19.20
  -3  -3   4  834.73   14.76
   3  -3  -4  828.20   14.60
  -3  -3   3  956.32   15.87
   3  -3  -3  967.32   16.27
  -3  -3   2 3860.73   50.75
  -3  -3   2 3676.51   48.85
  -3  -3   1 3485.31   47.55
   3   3  -1 3516.39   46.10
   3  -3  -1 3428.19   49.26
   3  -3  -1 3580.16   49.37
  -3  -3   0  601.67    8.64
   3  -3   0  614.98   10.95
   3  -3   0  586.36   10.74
   3   3   1 4504.25   59.67
   3  -3   2 2223.50   33.28
   3  -3   2 2227.82   32.89
   3   3   2 2264.39   30.74
   3   3   2 2200.97   30.76
   3  -3   2 2212.07   33.16
   3  -3   2 2309.50   32.27
   3  -3   2 2203.85   32.81
   3   3   2 2250.57   32.89
   3   3   3 2551.98   36.41
   3  -3   3 2526.56   36.39
   3  -3   3 2387.97   36.76
   3  -3   3 2419.18   36.87
   3   3   3 2495.77   34.51
   3  -3   3 2534.28   35.53
   3  -3   3 2498.74   36.28
   3   3   3 2523.09   36.34
   3  -3   4 1088.88   19.03
   3  -3   4 1133.55   19.18
   3   3   4 1144.57   17.16
   3  -3   4 1140.28   18.49
   3   3   4 1149.01   18.57
   3  -3   4 1117.66   17.69
   3  -3   4 1138.72   18.53
   3   3   4 1132.41   18.55
   3  -3   5 2946.71   42.76
   3   3   5 2885.98   40.59
   3   3   5 2924.74   41.84
   3  -3   5 2913.48   41.76
   3  -3   5 2905.06   41.83
   3   3   5 2886.53   41.87
   3  -3   5 2837.83   40.88
   3   3   6 1155.28   18.29
   3  -3   6 1131.08   19.88
   3   3   6 1118.49   19.02
   3  -3   6 1127.18   19.03
   3  -3   6 1104.08   18.13
   3   3   6 1145.79   19.11
   3  -3   6 1133.74   19.07
   3  -3   7 2699.22   40.31
   3  -3   7 2616.65   39.07
   3   3   7 2609.68   39.00
   3   3   7 2622.60   38.46
   3  -3   7 2621.93   39.17
   3   3   7 2611.71   39.08
   3  -3   7 2604.33   38.19
   3  -3   8 1978.88   31.57
   3   3   8 1903.77   29.67
   3  -3   8 1869.33   30.20
   3   3   8 1895.71   30.15
   3  -3   8 1877.60   29.13
   3  -3   9 4608.38   65.58
   3   3   9 4482.64   65.25
   3  -3   9 4411.19   63.89
   3   3   9 4617.39   64.97
   3  -3   9 4662.22   66.94
   3  -3  10 1667.88   29.04
   3   3  10 1586.69   27.23
  -3   3 -10 1592.70   27.78
  -3  -3 -10 1580.16   27.43
   3  -3  10 1628.31   27.75
   3   3  10 1606.00   27.50
   3  -3  10 1617.91   26.23
   3  -3  10 1524.77   29.60
   3   3  11 4496.69   66.07
   3  -3  11 4476.03   68.03
  -3  -3 -11 4489.79   65.93
  -3   3 -11 4507.42   66.63
  -3  -3 -11 4500.22   66.42
   3  -3  11 4636.45   66.70
   3   3  11 4617.22   66.49
   3   3  12 2126.99   35.98
   3  -3  12 2127.37   37.88
   3   3  12 2169.18   36.24
   3  -3  12 2193.41   36.46
   3  -3  12 2216.94   36.66
   3   3  12 2187.57   36.47
  -3  -3 -12 2114.75   35.67
  -3  -3 -12 2124.83   36.39
  -3   3 -12 2163.55   36.57
   3   3  13 1521.49   28.31
   3  -3  13 1554.14   30.32
   3   3  13 1559.62   28.75
   3  -3  13 1568.63   28.82
   3  -3  13 1603.14   29.12
   3   3  13 1581.49   28.95
  -3  -3 -13 1553.77   28.87
  -3   3 -13 1571.61   29.04
  -3  -3 -13 1528.86   27.96
  -3  -3 -14 1313.83   24.97
  -3   3 -14 1345.07   26.18
  -3  -3 -14 1347.26   26.18
   3   3  14 1318.59   25.90
   3  -3  14 1360.03   26.13
   3  -3  14 1324.31   27.33
   3   3  14 1265.08   25.26
  -3   3 -15 1770.19   32.14
  -3  -3 -15 1755.80   31.97
  -3  -3 -15 1719.41   30.65
  -3   3 -16  785.62   18.04
  -3  -3 -16  753.38   17.80
  -3   3 -17 1101.55   22.22
  -3  -3 -17 1091.65   22.04
  -3   3 -18  120.30    5.69
  -3  -3 -18  121.42    5.64
  -3   3 -19  599.85   12.67
  -3  -3 -19  596.38   12.59
   3   4 -20   26.80    2.20
   3  -4 -20   25.93    2.15
   3   4 -19  871.96   16.55
   3  -4 -19  863.85   16.55
   3   4 -18  139.42    5.68
   3  -4 -18  145.89    5.87
   3  -4 -18  141.07    5.30
   3   4 -17 1262.71   23.16
   3  -4 -17 1263.74   23.26
   3  -4 -17 1232.79   22.49
   3   4 -16  253.30    8.34
   3  -4 -16  249.25    8.34
   3  -4 -16  241.78    8.04
  -3  -4  15 2943.73   45.74
   3  -4 -15 2869.68   45.29
   3  -4 -15 2834.68   46.86
   3   4 -14  533.09   14.08
   3  -4 -14  542.90   14.20
  -3  -4  14  539.40   15.39
  -3   4  14  519.57   14.76
   3  -4 -14  524.13   14.16
   3  -4 -14  539.37   13.23
  -3  -4  14  504.69   14.86
   3  -4 -13 4194.04   64.23
   3   4 -13 4179.28   63.91
   3  -4 -13 4223.33   64.01
   3  -4 -13 4207.60   62.86
  -3   4  13 4311.45   65.89
  -3  -4  13 4157.11   65.94
   3  -4 -12  426.69   11.97
  -3  -4  12  440.13   13.08
  -3   4  12  435.86   13.04
   3   4 -12  404.91   11.58
   3  -4 -12  419.04   11.66
   3  -4 -12  420.35   11.20
   3  -4 -11 3374.66   50.39
   3   4 -11 3359.94   50.35
   3  -4 -11 3318.60   51.75
   3  -4 -11 3376.22   50.74
   3   4 -11 3285.28   51.18
   3  -4 -10  598.68   14.06
   3   4 -10  608.11   13.12
   3  -4 -10  601.43   13.06
   3   4  -9 4113.58   59.02
   3  -4  -9 4082.77   58.96
   3   4  -8  168.62    5.50
   3  -4  -8  172.00    5.53
  -3  -4   8  171.36    6.60
   3   4  -7 4423.44   62.63
   3  -4  -7 4518.37   62.64
   3  -4  -7 4364.01   64.08
   3   4  -6 1015.82   17.24
   3  -4  -6 1046.29   17.30
  -3  -4   6 1070.61   19.01
   3  -4  -6 1042.05   18.36
   3   4  -5 4970.78   69.34
   3  -4  -5 4994.27   69.35
   3  -4  -4  358.87    8.43
  -3  -4   4  381.35    8.48
   3  -4  -2 2172.56   31.62
  -3  -4   2 2083.53   29.71
   3  -4   0 1399.33   22.32
  -3  -4   0 1390.94   19.45
   3   4   1 3650.28   47.78
   3   4   2   98.00    2.37
   3  -4   2   95.74    3.90
   3   4   2   98.98    2.35
   3  -4   2  101.41    3.57
   3  -4   3 1228.32   21.27
   3   4   3 1301.58   18.41
   3  -4   3 1205.84   21.20
   3   4   3 1284.82   20.55
   3  -4   3 1272.05   20.49
   3  -4   3 1260.32   20.40
   3   4   3 1255.38   20.39
   3  -4   3 1322.17   20.16
   3  -4   4  811.11   15.57
   3   4   4  819.42   12.97
   3   4   4  835.31   14.66
   3  -4   4  841.30   14.65
   3  -4   4  829.01   14.20
   3   4   4  828.48   14.61
   3  -4   4  832.37   14.58
   3  -4   5  664.98   12.59
   3   4   5  685.59   12.72
   3  -4   5  690.30   12.31
   3   4   5  685.82   12.69
   3  -4   5  666.85   12.56
   3  -4   5  676.77   13.71
   3   4   5  646.29   11.37
   3  -4   6   91.68    3.80
   3   4   6   95.44    3.88
   3  -4   6   96.82    3.66
   3  -4   6   92.99    4.38
   3  -4   6   92.56    3.80
   3   4   6   99.72    3.93
   3   4   6   94.26    3.37
   3  -4   7  132.55    4.49
   3  -4   7  114.09    4.48
   3   4   7  119.18    4.57
   3  -4   7  120.74    5.18
   3   4   7  117.84    4.51
   3  -4   7  111.79    4.42
   3   4   7  120.34    4.22
   3  -4   8   15.26    1.82
   3   4   8   15.82    1.82
   3  -4   8   16.38    1.76
   3  -4   8   17.60    2.19
   3   4   8   14.26    1.74
   3  -4   8   15.07    1.78
   3   4   8   15.72    1.68
  -3  -4  -9   70.80    4.10
   3  -4   9   77.68    3.99
   3   4   9   75.08    3.92
   3   4   9   77.13    4.01
   3  -4   9   79.30    4.09
   3  -4   9   77.29    3.77
   3  -4   9   72.58    4.43
   3   4   9   79.65    3.91
   3  -4  10   42.04    3.82
   3   4  10   41.04    3.08
   3  -4  10   43.93    3.19
   3  -4  10   43.73    3.22
   3   4  10   43.86    3.19
   3  -4  10   39.53    2.76
  -3   4 -10   39.75    3.27
  -3  -4 -10   41.35    3.32
   3   4  10   42.85    3.04
   3  -4  10   39.58    3.53
   3  -4  11  294.66   10.46
   3  -4  11  313.30    9.40
   3   4  11  313.11    9.36
   3  -4  11  308.29    9.40
   3   4  11  317.48    9.47
  -3  -4 -11  307.66    9.46
  -3   4 -11  299.14    9.44
  -3  -4 -11  313.35    9.47
   3   4  11  303.00    9.20
   3  -4  11  304.29   10.42
   3  -4  12  118.12    6.94
   3   4  12  137.57    6.20
   3  -4  12  141.75    6.30
  -3   4 -12  143.56    6.57
  -3  -4 -12  140.22    6.48
   3  -4  12  140.68    6.32
   3   4  12  136.95    6.26
   3   4  12  130.79    5.92
   3  -4  12  155.49    7.48
  -3  -4 -12  135.38    6.22
   3  -4  13  345.49   10.62
   3   4  13  337.39   10.56
  -3   4 -13  330.94   10.63
  -3  -4 -13  328.31   10.55
  -3  -4 -13  341.67   10.37
   3  -4  13  335.86   10.54
   3   4  13  331.19   10.51
   3  -4  13  347.45   11.83
   3   4  13  309.16    9.97
  -3  -4 -14  487.14   13.00
  -3   4 -14  486.85   13.59
  -3  -4 -14  493.62   13.58
   3  -4  14  474.43   14.51
  -3   4 -15  837.22   19.08
  -3  -4 -15  843.24   19.09
  -3  -4 -15  839.87   18.30
  -3   4 -16  115.18    6.17
  -3  -4 -16  126.52    6.38
  -3  -4 -16  114.62    5.67
  -3   4 -17  982.64   20.27
  -3  -4 -17  962.44   20.03
  -3  -4 -18   60.67    3.95
  -3   4 -18   64.95    4.09
  -3  -4 -19 1071.72   18.58
  -3   4 -19 1075.41   18.72
   3   5 -20   46.85    2.60
   3  -5 -20   46.01    2.56
   3  -5 -19 1674.10   26.67
   3   5 -19 1662.78   26.56
   3  -5 -18   24.31    2.36
   3   5 -18   23.75    2.46
   3  -5 -18   27.60    2.64
   3  -5 -17  993.32   19.33
   3   5 -17 1014.54   19.53
   3  -5 -17 1031.60   19.73
   3  -5 -16   13.98    2.19
   3   5 -16   14.19    2.22
   3  -5 -16   15.22    2.25
  -3  -5  16   13.09    2.14
   3  -5 -15  836.14   19.31
   3  -5 -15  839.10   17.99
   3  -5 -15  849.22   17.88
   3   5 -15  845.94   17.75
  -3  -5  14   24.45    3.35
  -3   5  14   19.70    2.92
   3   5 -14   24.05    2.91
   3  -5 -14   18.23    2.62
  -3  -5  14   17.96    2.94
   3  -5 -14   19.02    2.91
   3  -5 -14   19.84    2.57
   3   5 -13  578.77   14.52
   3  -5 -13  578.77   14.57
   3  -5 -13  583.26   15.02
  -3  -5  13  599.09   16.25
  -3   5  13  588.96   15.73
  -3  -5  13  554.95   15.34
   3  -5 -13  591.75   14.19
  -3  -5  12    8.20    1.96
   3  -5 -12    8.10    1.86
   3   5 -12   11.16    2.01
   3  -5 -12    9.41    1.95
   3  -5 -12   10.14    2.15
   3  -5 -11    7.41    1.79
   3  -5 -11    3.34    1.61
   3   5 -11    5.18    1.48
   3  -5 -10   14.33    2.26
   3   5 -10   15.28    1.87
   3  -5 -10   14.97    1.85
   3   5 -10   16.36    2.13
  -3  -5  10   13.29    2.27
  -3  -5   9    8.63    1.91
   3  -5  -9    9.29    1.50
   3   5  -9    9.54    1.50
  -3  -5   8   48.54    3.59
   3   5  -8   47.92    2.84
   3  -5  -8   49.45    2.85
   3  -5  -7  886.82   16.99
  -3  -5   7  898.87   17.58
   3   5  -7  858.44   15.53
   3  -5  -7  873.15   15.58
  -3  -5   6   44.25    3.05
   3  -5  -6   38.42    2.72
   3  -5  -6   41.98    2.35
   3   5  -6   43.13    2.38
   3   5  -5   61.41    2.70
   3  -5  -5   62.82    2.74
   3  -5  -5   62.56    2.75
   3   5  -5   61.55    2.74
  -3  -5   5   67.63    3.45
   3  -5  -5   67.21    3.41
   3  -5  -4  670.76   11.65
   3   5  -4  667.34   11.58
  -3  -5   4  624.75   10.20
   3  -5  -4  665.94   13.01
   3  -5  -4  657.46   11.61
   3   5  -4  649.95   11.55
  -3  -5   3 5541.17   74.25
   3  -5  -3 5283.05   75.31
  -3  -5   2  369.23    7.30
   3  -5  -2  349.33    8.48
  -3   5   2  355.62    8.50
  -3  -5   1 4045.30   55.33
   3  -5  -1 4126.30   58.22
  -3   5   1 4184.63   58.16
  -3   5   0  192.08    5.69
   3  -5   0  198.77    5.68
   3  -5   0  185.62    5.59
   3  -5   2  681.32   12.55
   3  -5   2  697.01   11.67
   3   5   4  705.38   13.10
   3  -5   4  714.36   13.12
   3   5   4  711.18   13.14
   3  -5   4  712.73   13.16
   3  -5   4  661.25   14.06
   3   5   4  687.84   11.11
   3  -5   4  703.60   13.04
   3  -5   5 6016.46   82.45
   3   5   5 5945.85   80.48
   3  -5   5 5858.33   84.21
   3  -5   5 6007.54   82.26
   3   5   5 6148.28   82.63
   3  -5   5 6001.65   82.48
   3   5   6  159.73    5.27
   3  -5   6  161.81    5.26
   3   5   6  159.07    4.52
   3  -5   6  158.29    5.23
   3   5   6  159.27    5.30
   3  -5   6  160.61    5.19
   3  -5   7 7096.06   98.95
   3   5   7 7317.80   99.19
   3   5   7 7267.06   99.09
   3   5   7 7504.67   97.89
   3  -5   7 7354.55  101.34
   3   5   8   63.15    3.18
   3  -5   8   64.41    3.51
   3   5   8   63.70    3.49
   3  -5   8   63.39    3.44
   3   5   8   64.90    3.50
   3  -5   8   65.68    3.50
   3  -5   8   62.50    4.13
  -3  -5  -9 3934.37   58.84
   3   5   9 3984.65   57.19
   3   5   9 4038.28   58.11
   3  -5   9 3946.55   57.92
   3  -5   9 3960.39   58.06
   3   5   9 4048.81   58.24
   3  -5   9 3902.35   57.59
  -3   5  -9 3830.06   58.14
   3  -5   9 3903.21   59.56
   3  -5   9 4065.46   60.66
  -3  -5 -10   34.77    3.16
   3   5  10   35.05    2.78
   3  -5  10   28.10    2.58
   3   5  10   26.29    2.51
   3  -5  10   28.21    2.64
   3   5  10   27.61    2.60
   3  -5  10   33.03    2.69
  -3   5 -10   29.59    2.85
   3  -5  10   28.40    3.20
   3  -5  10   27.38    3.14
   3  -5  11 4253.81   64.59
   3   5  11 4072.89   60.87
   3  -5  11 4127.75   61.59
   3   5  11 4176.17   61.75
   3  -5  11 4149.00   61.63
   3   5  11 4177.97   61.76
   3  -5  11 4023.44   60.56
  -3   5 -11 4072.03   61.77
  -3  -5 -11 4102.02   61.87
   3  -5  11 4087.00   63.94
  -3  -5 -11 4150.00   62.07
   3  -5  12   87.85    5.77
   3   5  12   86.49    4.66
   3  -5  12  101.72    5.29
   3   5  12   98.59    5.25
   3  -5  12   93.17    5.11
   3   5  12   91.54    5.09
  -3   5 -12   92.24    5.27
  -3  -5 -12   93.24    5.37
   3  -5  12   81.31    5.72
  -3  -5 -12   89.51    5.15
   3   5  13 3232.53   50.78
   3  -5  13 3174.55   50.58
  -3   5 -13 3167.20   50.71
  -3  -5 -13 3225.48   50.92
   3  -5  13 3188.02   50.68
   3   5  13 3210.60   50.86
   3  -5  13 3119.14   53.10
  -3  -5 -13 3155.05   50.33
  -3  -5 -14   58.31    4.31
  -3   5 -14   64.45    4.68
  -3  -5 -14   65.93    4.74
  -3  -5 -15 1657.58   29.83
  -3   5 -15 1668.23   30.62
  -3  -5 -15 1658.13   30.55
  -3  -5 -16    7.48    2.07
  -3   5 -16    2.31    1.96
  -3  -5 -16    3.53    2.00
  -3  -5 -17 1376.72   24.48
  -3   5 -17 1421.98   25.80
  -3  -5 -17 1386.51   25.57
  -3   5 -18    8.44    1.90
  -3  -5 -18    7.46    1.86
  -3   5 -19 1055.86   17.50
  -3  -5 -19 1049.97   17.41
   3  -6 -19 1058.12   18.29
   3  -6 -19 1079.09   18.58
   3   6 -19 1103.06   18.71
   3  -6 -18   55.47    3.40
   3   6 -18   53.52    3.34
   3  -6 -18   54.34    3.37
   3  -6 -17  978.18   19.31
   3   6 -17 1022.57   19.23
   3  -6 -17 1027.95   19.44
  -3  -6  16  167.14    6.69
   3  -6 -16  178.87    6.92
   3   6 -16  180.30    6.67
   3  -6 -16  180.82    6.75
  -3  -6  15 1769.75   30.53
   3  -6 -15 1689.80   29.91
   3   6 -15 1658.61   29.00
   3  -6 -15 1689.20   29.31
  -3   6  14  323.19   11.20
  -3  -6  14  344.72   11.13
   3  -6 -14  352.94   10.52
   3  -6 -14  359.63   11.60
   3   6 -13 3123.03   49.88
   3  -6 -13 3186.09   50.17
  -3   6  13 3076.55   51.93
   3  -6 -13 3292.83   50.05
   3  -6 -13 3177.47   51.52
  -3  -6  12  111.05    6.13
   3   6 -12  131.63    6.01
   3  -6 -12  128.87    6.00
   3  -6 -12  131.30    6.03
   3  -6 -12  128.92    6.48
  -3  -6  11 2802.34   47.10
  -3  -6  11 3160.43   49.56
   3   6 -11 2878.61   46.05
   3  -6 -11 2988.48   46.35
   3  -6 -11 3014.66   47.69
   3  -6 -11 3034.23   46.71
   3   6 -10   87.29    4.53
  -3  -6  10  102.33    5.69
   3  -6 -10   94.20    4.39
   3   6 -10   91.89    4.29
   3  -6 -10   96.82    4.89
  -3  -6  10   93.43    5.05
   3  -6 -10   94.14    5.18
   3   6  -9 7664.84  105.18
   3  -6  -9 7833.44  105.33
   3   6  -8  487.41   10.58
   3  -6  -8  490.06   10.62
  -3  -6   8  461.01   11.12
   3  -6  -7 6248.27   84.70
   3   6  -7 6178.77   84.61
   3  -6  -7 6173.11   86.73
  -3  -6   7 6475.12   87.89
   3   6  -6  434.95    9.04
   3  -6  -6  440.30    9.16
  -3  -6   6  405.06    8.86
  -3  -6   6  473.73   11.00
   3  -6  -6  443.86   10.52
   3   6  -5 3272.00   46.45
   3  -6  -5 3323.60   46.54
  -3  -6   5 3305.31   45.54
   3   6  -5 3198.13   46.53
   3  -6  -5 3258.38   46.59
   3  -6  -5 3367.91   48.94
   3   6  -4  236.32    5.40
   3  -6  -4  239.14    5.45
   3  -6  -4  250.25    5.51
   3   6  -4  247.68    5.44
   3  -6  -4  243.17    6.84
   3  -6  -3 4212.35   60.97
  -3  -6   3 4327.01   59.65
  -3   6   2 1353.43   22.94
   3  -6  -2 1340.99   22.77
  -3  -6   2 1368.32   20.96
   3  -6  -2 1399.04   23.23
  -3  -6   1 5662.63   78.24
   3  -6  -1 5844.64   81.45
   3  -6   0 1553.91   25.39
  -3  -6   0 1560.56   22.21
   3  -6   0 1581.49   25.65
   3  -6   1 4836.71   67.78
   3  -6   2  262.27    6.99
   3  -6   2  267.34    7.47
   3  -6   3 5770.37   80.95
   3  -6   4   16.31    1.68
   3   6   4   15.12    1.64
   3  -6   4   12.58    1.64
   3  -6   4   11.27    1.78
   3  -6   4   15.38    1.67
   3   6   4   13.62    1.59
   3   6   5 1378.80   22.57
   3  -6   5 1355.15   22.43
   3  -6   5 1387.14   22.61
   3  -6   5 1324.60   24.14
   3   6   5 1387.34   22.64
   3  -6   5 1353.32   22.47
   3   6   6  287.90    6.37
   3  -6   6  285.23    7.54
   3   6   6  290.44    7.66
   3  -6   6  281.64    8.74
   3  -6   6  288.63    7.58
   3   6   6  297.39    7.75
   3  -6   6  283.28    7.62
   3   6   7   91.41    3.50
   3  -6   7   89.59    4.06
   3   6   7   90.29    4.13
   3  -6   7   90.20    4.07
   3  -6   7   84.93    3.95
   3   6   7   91.91    4.14
   3  -6   7   86.65    4.85
  -3  -6  -8  162.18    6.22
   3   6   8  159.93    5.12
   3   6   8  163.71    5.87
   3  -6   8  157.67    5.69
   3  -6   8  149.20    5.59
   3   6   8  160.62    5.85
   3  -6   8  158.12    5.71
   3  -6   8  156.83    6.19
   3  -6   8  152.94    6.74
  -3  -6  -9   92.82    4.90
   3   6   9   99.73    4.24
   3   6   9  101.38    4.75
   3  -6   9   96.28    4.61
   3  -6   9   97.30    4.66
   3   6   9  100.53    4.77
   3  -6   9   98.00    4.55
  -3   6  -9   92.79    4.75
   3  -6   9   89.53    4.93
   3  -6   9   94.26    5.48
   3  -6  10   44.00    4.01
   3  -6  10   51.05    4.02
   3   6  10   52.16    3.59
   3  -6  10   48.31    3.43
   3  -6  10   51.80    3.57
   3   6  10   47.04    3.44
   3  -6  10   46.54    3.29
  -3   6 -10   44.64    3.50
  -3  -6 -10   48.86    3.71
  -3  -6 -10   51.16    3.79
   3  -6  11  164.96    7.53
   3   6  11  170.70    6.87
   3  -6  11  168.25    6.77
   3   6  11  170.11    6.92
   3  -6  11  168.09    6.78
   3  -6  11  164.47    6.47
  -3   6 -11  168.26    6.92
  -3  -6 -11  179.97    7.25
  -3  -6 -11  178.46    7.23
   3  -6  12  190.23    8.64
   3  -6  12  194.06    7.57
   3   6  12  202.45    7.80
   3  -6  12  193.18    7.59
   3   6  12  202.57    7.86
  -3   6 -12  191.17    7.70
  -3  -6 -12  200.78    7.95
  -3  -6 -12  192.99    7.78
   3  -6  13  334.56   11.86
  -3   6 -13  355.34   11.03
  -3  -6 -13  367.54   11.27
   3  -6  13  343.67   10.79
   3   6  13  359.27   11.13
  -3  -6 -13  361.82   10.98
   3  -6  13  353.74   10.89
   3   6  13  355.44   11.04
  -3  -6 -14   76.74    5.11
  -3   6 -14   71.68    4.97
  -3  -6 -14   72.70    4.80
  -3   6 -15  980.57   20.86
  -3  -6 -15 1008.32   21.12
  -3  -6 -15  966.25   20.39
  -3   6 -16   48.90    4.01
  -3  -6 -16   47.97    3.95
  -3  -6 -16   49.29    3.81
  -3  -6 -17 1113.18   21.05
  -3   6 -17 1116.50   21.07
  -3  -6 -17 1077.28   20.45
  -3   6 -18  112.79    4.62
  -3  -6 -18  116.56    4.67
  -3  -6 -18  114.65    4.27
   3   7 -19  711.20   12.83
   3  -7 -19  669.64   12.54
   3  -7 -18  181.73    6.20
   3   7 -18  187.91    6.00
   3  -7 -18  187.37    6.01
   3  -7 -17  733.23   15.36
   3  -7 -17  732.03   14.89
   3   7 -17  723.65   14.71
  -3  -7  16  164.08    6.50
   3  -7 -16  159.07    6.57
   3   7 -16  157.66    6.09
   3  -7 -16  164.29    6.28
  -3  -7  15  308.00    9.84
   3  -7 -15  307.30    9.64
   3   7 -15  302.80    8.91
   3  -7 -15  318.01    9.20
   3  -7 -14  156.00    7.51
   3   7 -14  152.67    6.10
   3  -7 -14  160.91    6.33
   3  -7 -14  157.46    6.81
  -3  -7  14  164.35    7.34
  -3  -7  13  526.78   14.24
  -3   7  13  496.48   14.41
   3  -7 -13  517.90   14.45
   3  -7 -13  519.70   13.44
  -3  -7  12  119.77    6.87
   3  -7 -12  113.89    6.23
   3  -7 -12  117.28    5.68
   3   7 -12  116.51    5.58
   3  -7 -12  120.09    5.85
  -3  -7  11   46.09    4.22
   3  -7 -11   40.34    3.73
   3  -7 -11   42.97    3.52
   3   7 -11   39.99    3.23
   3  -7 -11   44.52    3.40
  -3  -7  10   35.16    3.57
   3  -7 -10   34.44    3.14
   3   7  -9   10.75    1.52
   3  -7  -9   10.19    1.50
  -3  -7   9   10.39    1.72
  -3  -7   9    9.37    2.11
   3  -7  -8   11.82    2.28
   3   7  -8   11.12    1.43
   3  -7  -8   10.92    1.48
  -3  -7   8   14.46    2.28
   3  -7  -7  261.87    6.83
   3   7  -7  256.55    6.69
   3  -7  -6  151.35    4.75
   3   7  -6  154.04    4.70
   3   7  -5  218.24    5.53
   3  -7  -5  224.96    5.63
  -3  -7   5  228.61    7.03
   3  -7  -5  221.51    5.69
   3   7  -4  224.45    5.40
   3  -7  -4  226.94    5.45
   3   7  -4  215.96    5.39
   3  -7  -4  221.57    5.45
   3   7  -3 2853.37   40.13
   3  -7  -3 2920.96   40.26
  -3  -7   3 2903.03   41.81
  -3   7   3 2865.68   43.53
   3  -7  -3 2879.99   40.27
   3   7  -3 2811.45   40.17
   3  -7  -2 2457.63   37.74
  -3  -7   2 2359.40   35.06
  -3   7   2 2482.71   37.64
  -3  -7   1 1429.11   21.92
   3  -7  -1 1447.93   24.76
  -3  -7   0  574.59    9.41
  -3   7   0  581.19   12.50
   3  -7   1 3963.90   57.07
   3  -7   2 2110.71   32.90
   3  -7   4 4324.76   61.76
   3  -7   5 7452.05  102.45
   3   7   5 7600.55  102.63
   3  -7   5 7398.68  102.60
   3   7   5 7516.81  102.72
   3  -7   6  700.67   14.21
   3  -7   6  669.83   13.76
   3   7   6  707.93   14.06
   3  -7   6  684.02   13.88
   3   7   6  711.89   14.12
   3  -7   7 5059.67   73.51
   3   7   7 5313.24   73.35
   3  -7   7 5115.64   72.94
   3  -7   7 5154.05   73.33
   3   7   7 5293.81   73.29
   3  -7   7 5080.97   72.83
  -3  -7  -7 5030.30   73.59
   3   7   8 1246.86   21.95
   3  -7   8 1181.05   21.44
   3  -7   8 1154.37   22.19
   3   7   8 1241.32   21.96
   3  -7   8 1154.98   21.69
   3  -7   8 1183.66   21.50
   3  -7   8 1180.69   21.41
  -3  -7  -8 1201.97   22.28
   3  -7   9 3328.45   50.62
   3   7   9 3505.71   51.25
  -3  -7  -9 3379.27   51.65
   3  -7   9 3342.97   51.71
   3  -7   9 3301.15   50.62
   3   7   9 3471.55   51.21
   3  -7   9 3272.93   50.63
   3  -7   9 3241.70   50.25
   3  -7  10 1261.48   23.94
   3   7  10 1348.54   24.48
  -3  -7 -10 1313.58   24.76
  -3   7 -10 1272.34   24.21
  -3  -7 -10 1341.81   24.76
   3  -7  10 1315.20   25.21
   3  -7  10 1275.43   24.03
   3   7  10 1341.44   24.52
   3  -7  10 1307.12   23.98
   3  -7  10 1280.83   23.60
   3  -7  11 2043.41   36.20
  -3   7 -11 2014.19   34.84
  -3  -7 -11 2120.23   35.45
   3   7  11 2098.17   35.19
   3  -7  11 1999.96   34.58
   3  -7  11 2013.92   34.24
  -3  -7 -11 2046.48   35.23
   3  -7  11 2001.77   34.56
   3   7  11 2103.74   35.17
   3  -7  12 1152.86   24.23
   3  -7  12 1078.12   21.77
   3  -7  12 1097.37   22.41
  -3   7 -12 1124.43   22.67
  -3  -7 -12 1142.34   22.96
  -3  -7 -12 1119.23   22.73
   3  -7  12 1110.16   22.47
   3   7  12 1175.44   23.10
  -3   7 -13 1618.43   29.57
  -3  -7 -13 1673.16   30.06
  -3  -7 -13 1647.42   29.74
   3  -7  13 1482.36   30.74
   3  -7  13 1527.02   31.61
  -3  -7 -14  808.08   18.27
  -3   7 -14  809.30   18.35
  -3  -7 -14  837.06   18.75
  -3  -7 -15 1540.29   28.20
  -3  -7 -15 1527.79   28.35
  -3   7 -15 1522.60   28.14
  -3  -7 -16  446.67   11.87
  -3  -7 -16  439.43   11.71
  -3   7 -16  428.06   11.55
  -3  -7 -17  632.98   13.51
  -3  -7 -17  658.32   14.01
  -3   7 -18  155.38    4.64
  -3  -7 -18  154.03    4.61
  -3  -7 -18  159.00    5.03
   3  -8 -19  444.14    9.42
   3  -8 -18  436.44    9.41
   3  -8 -18  488.59   10.85
   3  -8 -17  480.83   10.76
  -3  -8  17  460.20   10.59
   3  -8 -17  483.97   11.70
   3  -8 -16  879.91   16.81
   3   8 -16  843.10   16.50
  -3  -8  16  820.63   17.34
   3  -8 -16  850.53   17.80
   3   8 -15  630.76   13.91
   3  -8 -15  658.48   14.23
  -3  -8  15  667.13   15.68
   3  -8 -15  657.19   15.35
   3   8 -14 1710.52   29.36
   3  -8 -14 1767.33   29.73
   3  -8 -14 1790.53   31.55
  -3   8  13  789.46   19.45
  -3  -8  13  879.13   21.36
   3   8 -13  820.48   16.75
   3  -8 -13  848.86   17.07
  -3  -8  13  912.65   20.05
   3  -8 -13  865.01   18.72
   3  -8 -13  875.79   20.11
  -3  -8  12 2131.32   37.09
   3  -8 -12 2040.50   36.84
  -3  -8  12 2086.61   38.50
   3  -8 -12 2040.54   35.32
  -3  -8  11 2354.06   40.96
   3  -8 -11 2318.04   37.93
  -3  -8  11 2253.40   36.50
  -3  -8  10 3134.02   48.24
   3  -8 -10 3083.03   50.26
  -3  -8   9 2592.18   43.59
  -3  -8   9 2547.39   40.28
  -3  -8   8 4038.22   59.72
  -3  -8   8 3950.26   56.74
   3   8  -8 3699.82   54.12
   3  -8  -8 3787.56   54.39
   3  -8  -8 3672.49   58.74
   3   8  -7 1647.35   26.47
   3  -8  -7 1723.92   26.73
   3  -8  -6 4814.15   66.69
   3   8  -6 4720.61   66.47
   3  -8  -5 4343.01   59.42
   3   8  -5 4236.32   59.23
  -3  -8   5 4369.76   62.73
   3  -8  -4 2518.08   35.25
   3   8  -4 2440.12   35.05
   3  -8  -4 2452.46   35.30
  -3  -8   4 2489.27   37.93
  -3  -8   3 2141.75   33.73
   3   8  -3 2239.34   31.65
   3  -8  -3 2276.17   31.79
  -3   8   3 2222.38   35.94
   3  -8  -3 2231.59   31.82
   3  -8  -2 2723.31   41.67
  -3  -8   2 2534.53   38.68
   3   8  -2 2642.09   37.09
   3  -8  -2 2726.63   37.24
   3  -8  -2 2653.55   37.22
  -3   8   2 2792.87   41.77
  -3  -8   1  934.41   15.43
   3  -8  -1  895.51   18.01
  -3   8   1  950.71   18.10
  -3  -8   0 1818.30   25.85
  -3   8   0 1852.40   30.05
   3  -8   1  141.41    5.52
   3  -8   2 1169.25   20.95
   3  -8   3  857.12   16.62
   3  -8   4  111.49    5.22
   3  -8   4  116.08    4.91
   3  -8   5   79.47    4.54
   3  -8   5   76.08    4.06
   3  -8   6  850.60   16.41
   3   8   6  855.06   16.50
   3   8   6  873.05   16.66
   3  -8   6  860.50   16.51
   3  -8   6  841.19   18.59
   3  -8   7    2.74    1.31
   3  -8   7    7.41    1.79
   3  -8   7    3.29    1.55
   3   8   7    3.49    1.19
   3  -8   7    1.68    1.00
   3  -8   7    8.37    1.63
   3   8   7    3.15    1.17
   3  -8   7    2.34    1.02
   3  -8   7    5.30    1.41
   3  -8   8   12.21    1.92
   3  -8   8   16.83    2.15
   3  -8   8   13.96    1.92
   3   8   8   14.15    2.00
   3  -8   8   11.59    2.12
   3  -8   8   13.49    2.42
   3  -8   8   11.65    1.89
   3  -8   8   13.86    1.90
   3   8   8   15.37    2.02
   3  -8   9   45.36    3.35
   3  -8   9   57.49    3.62
  -3  -8  -9   49.51    3.78
   3  -8   9   47.97    4.24
   3  -8   9   45.30    3.45
   3  -8   9   45.02    3.35
   3  -8   9   48.74    3.78
   3  -8   9   50.35    3.50
  -3  -8 -10   39.29    3.57
   3  -8  10   31.23    2.93
  -3  -8 -10   34.61    3.36
   3  -8  10   43.76    4.15
   3  -8  10   37.85    3.25
   3  -8  10   38.54    3.20
   3  -8  10   32.64    3.44
   3  -8  10   36.35    3.12
   3  -8  11   42.25    3.50
   3  -8  11   45.31    3.57
  -3  -8 -11   47.44    3.94
   3  -8  11   50.58    3.77
   3  -8  11   46.95    4.21
  -3  -8 -11   47.60    4.00
   3  -8  11   45.47    4.43
  -3  -8 -12   21.87    2.97
   3  -8  12   11.92    2.12
   3  -8  12   16.76    2.95
  -3  -8 -12   12.54    2.57
  -3   8 -12   14.87    2.62
   3  -8  12   13.21    2.62
  -3  -8 -13    9.93    2.33
   3  -8  13   10.01    2.64
  -3   8 -13    7.99    2.25
  -3  -8 -13   16.36    2.80
  -3  -8 -14  279.89    9.53
  -3   8 -14  272.92    9.29
  -3  -8 -14  267.99    9.33
   3  -8  14  242.69    9.62
  -3  -8 -15  197.93    7.75
  -3  -8 -15  191.31    7.38
  -3   8 -15  184.47    7.19
  -3  -8 -16  404.31   11.01
  -3  -8 -16  381.40   10.02
  -3  -8 -17  242.98    7.48
  -3  -8 -17  224.48    6.13
  -3  -8 -18  548.40   10.76
   3  -9 -19   85.96    3.44
   3  -9 -18  372.47    9.14
   3  -9 -17  212.22    7.07
  -3  -9  17  196.05    6.16
   3  -9 -16  700.96   15.48
  -3  -9  16  691.69   14.95
   3  -9 -15   93.25    5.19
   3  -9 -15   97.75    4.51
  -3  -9  15   98.32    5.34
   3  -9 -14  390.43   11.34
   3  -9 -14  378.29    9.87
  -3  -9  14  399.66   11.73
  -3  -9  13  161.55    7.52
   3  -9 -13  159.27    6.96
  -3  -9  12  123.21    7.33
  -3  -9  12  137.18    6.97
  -3  -9  12  135.38    5.92
   3  -9 -12  123.93    6.21
  -3  -9  11  198.44    9.09
  -3  -9  11  189.09    8.19
   3  -9 -11  180.86    8.08
  -3  -9  11  188.85    7.08
  -3  -9  10   30.92    2.90
   3  -9 -10   25.77    3.13
   3  -9 -10   28.93    3.10
  -3  -9  10   30.76    3.65
  -3  -9   9   99.92    5.06
   3  -9  -9   96.26    5.09
   3  -9  -9   99.61    5.53
  -3  -9   9  110.96    6.33
  -3  -9   8   35.36    3.03
  -3  -9   8   37.87    3.65
  -3  -9   7  179.51    6.73
   3  -9  -7  158.39    7.16
   3  -9  -7  181.28    7.00
  -3  -9   7  180.57    7.47
   3  -9  -6  348.52    7.54
   3  -9  -6  325.20   10.36
   3  -9  -6  345.13   10.06
   3  -9  -5  182.59    4.75
  -3  -9   5  186.70    6.80
   3  -9  -5  174.69    6.78
   3  -9  -4  972.19   15.18
   3  -9  -4  974.13   18.92
   3  -9  -3    7.27    1.57
  -3  -9   3    7.78    1.44
   3  -9  -2 2700.23   42.82
  -3  -9   2 2779.66   40.62
   3  -9  -1   87.73    4.57
   3  -9  -1   83.30    4.66
   3  -9   0 1544.80   27.29
  -3  -9   0 1614.95   23.60
   3  -9   0 1562.01   27.58
   3  -9   1  887.65   17.69
   3  -9   1  835.22   17.35
   3  -9   2 1458.99   25.39
   3  -9   2 1350.36   24.72
   3  -9   3 2315.63   37.18
   3  -9   3 2253.81   36.47
   3  -9   4 3313.86   49.86
   3  -9   4 3108.33   48.74
   3  -9   5  792.24   17.77
   3  -9   5  846.51   16.68
   3  -9   5  830.03   17.05
   3  -9   6 4923.48   74.52
   3  -9   6 5098.69   73.16
   3  -9   6 5097.45   72.58
   3  -9   6 5003.43   72.07
   3  -9   7  622.32   15.85
   3  -9   7  645.25   14.55
   3  -9   7  650.62   14.75
   3  -9   7  652.66   14.41
   3  -9   7  656.93   14.12
   3  -9   8 5097.62   77.87
   3  -9   8 5326.02   74.64
   3  -9   8 5259.05   74.98
   3  -9   8 5243.17   75.54
   3  -9   8 5352.85   75.89
   3  -9   9 1194.58   25.87
   3  -9   9 1253.51   23.02
   3  -9   9 1262.07   23.49
   3  -9   9 1291.24   24.44
   3  -9   9 1263.20   24.13
   3  -9  10 4558.53   68.48
   3  -9  10 4438.12   71.04
   3  -9  10 4622.84   66.80
   3  -9  10 4541.09   67.71
   3  -9  10 4704.63   69.22
  -3  -9 -10 4520.00   68.53
   3  -9  11  792.58   18.42
   3  -9  11  781.69   17.69
   3  -9  11  737.69   19.30
  -3  -9 -11  765.30   17.75
   3  -9  12 3091.07   50.66
  -3  -9 -12 3051.05   49.45
  -3  -9 -13  193.02    7.65
   3  -9  13  185.43    8.53
  -3  -9 -13  194.58    7.97
  -3  -9 -14 1673.31   29.51
   3  -9  14 1649.00   31.70
  -3  -9 -15  102.80    5.49
  -3  -9 -16 1249.34   23.31
  -3  -9 -17   27.99    2.64
  -3  -9 -18  626.28   11.40
   3 -10 -18  756.04   14.41
   3 -10 -17    4.22    1.51
  -3 -10  17    2.95    1.22
   3 -10 -16 1318.76   23.68
  -3 -10  16 1249.22   22.85
   3 -10 -15    8.06    2.00
  -3 -10  15    5.95    1.81
  -3 -10  14 2187.18   37.61
   3 -10 -14 2216.01   37.09
  -3 -10  13   26.06    2.79
  -3 -10  13   20.92    2.97
   3 -10 -12 2594.90   45.25
  -3 -10  12 2651.08   42.64
  -3 -10  11  483.59   12.61
   3 -10 -11  494.48   14.15
  -3 -10  11  522.78   15.71
  -3 -10  11  531.88   14.49
   3 -10 -11  489.93   13.16
  -3 -10  10 4833.26   74.85
  -3 -10  10 4700.07   69.99
   3 -10 -10 4686.30   72.25
  -3 -10  10 4933.90   72.89
   3 -10 -10 4691.22   70.59
   3 -10  -9   26.44    3.07
  -3 -10   9   28.53    2.89
  -3 -10   9   20.85    2.91
   3 -10  -9   23.45    2.76
  -3 -10   9   22.72    3.22
  -3 -10   8 2836.72   47.16
  -3 -10   8 2824.49   44.33
   3 -10  -8 2791.33   43.98
   3 -10  -8 2685.45   44.64
   3 -10  -7   13.43    2.17
  -3 -10   7   11.06    2.06
  -3 -10   7   17.01    2.60
  -3 -10   6 5943.14   88.91
   3 -10  -6 6098.65   88.43
  -3 -10   5  102.02    5.15
   3 -10  -5   97.33    5.05
  -3 -10   5  102.12    5.19
  -3 -10   4 3157.67   50.43
   3 -10  -4 3372.30   51.65
  -3 -10   3   56.24    3.40
   3 -10  -3   56.38    3.79
  -3 -10   2 3508.89   49.91
   3 -10  -2 3277.62   51.87
  -3 -10   1   29.54    2.11
   3 -10  -1   25.94    2.70
   3 -10   0 2118.59   36.46
   3 -10   0 2239.05   36.26
   3 -10   1  247.65    8.52
   3 -10   1  252.98    8.41
   3 -10   2 2276.01   38.09
   3 -10   2 2420.77   38.58
   3 -10   3   11.15    1.85
   3 -10   3   12.05    2.01
   3 -10   3   10.12    2.17
   3 -10   3   10.17    1.93
   3 -10   4  525.26   13.04
   3 -10   4  525.61   13.32
   3 -10   4  529.72   12.31
   3 -10   4  499.24   11.95
   3 -10   5  208.71    7.69
   3 -10   5  212.24    8.01
   3 -10   5  216.46    7.39
   3 -10   5  201.24    6.98
   3 -10   6   17.38    2.39
   3 -10   6   20.26    2.68
   3 -10   6   19.68    2.37
  -3 -10  -7   51.62    3.74
   3 -10   7   47.50    3.50
   3 -10   7   48.96    3.82
   3 -10   7   46.30    3.51
   3 -10   7   45.65    3.64
   3 -10   7   46.43    3.98
  -3 -10  -8   68.21    4.44
   3 -10   8   72.13    4.31
   3 -10   8   65.44    4.46
   3 -10   8   65.07    4.15
   3 -10   8   68.55    4.48
   3 -10   8   67.29    4.92
   3 -10   9  108.24    5.28
   3 -10   9  105.11    5.72
   3 -10   9  111.22    5.55
   3 -10   9  106.56    5.77
   3 -10   9  105.43    6.24
   3 -10  10   97.81    5.00
   3 -10  10   95.51    5.50
   3 -10  10  100.36    6.23
   3 -10  10   98.62    5.72
   3 -10  10   98.56    5.25
   3 -10  11  162.45    6.42
   3 -10  11  148.31    7.64
  -3 -10 -11  168.09    7.39
   3 -10  11  160.38    7.49
  -3 -10 -12  167.57    7.43
   3 -10  12  169.23    7.89
   3 -10  13    5.37    2.37
  -3 -10 -13    9.41    2.29
   3 -10  14  223.12    8.91
  -3 -10 -14  235.20    8.61
  -3 -10 -15   37.17    3.46
  -3 -10 -16  575.33   13.27
  -3 -10 -17   35.70    2.73
   3 -10  18  441.64    8.96
   3 -11 -18  589.85   11.64
  -3 -11  17   11.65    1.62
   3 -11 -17   16.66    2.08
  -3 -11  16  612.31   13.26
   3 -11 -16  635.77   13.95
  -3 -11  15   88.64    4.88
   3 -11 -15   94.35    4.99
  -3 -11  14  271.04    9.18
  -3 -11  13  318.59   10.74
  -3 -11  13  331.58    9.79
   3 -11 -12   59.91    4.35
  -3 -11  12   68.16    4.90
  -3 -11  12   57.68    4.03
  -3 -11  11    2.17    1.75
  -3 -11  11    3.38    1.63
   3 -11 -11    1.15    1.59
  -3 -11  11    1.15    1.76
   3 -11 -10    7.09    2.09
  -3 -11  10   13.55    2.55
  -3 -11  10    6.96    1.94
   3 -11 -10    7.05    2.01
  -3 -11  10   16.30    2.89
   3 -11  -9    2.79    1.75
  -3 -11   9    1.97    1.79
  -3 -11   9    1.08    1.59
   3 -11  -9    0.72    1.56
  -3 -11   9    2.24    1.50
   3 -11  -8   12.70    2.20
  -3 -11   8   11.22    2.11
  -3 -11   8   11.94    2.48
   3 -11  -8   11.77    2.23
   3 -11  -7   12.58    2.21
   3 -11  -7   10.81    2.10
   3 -11  -7   12.62    2.07
  -3 -11   7    8.83    2.16
  -3 -11   7   10.91    2.11
  -3 -11   7   11.93    2.39
  -3 -11   6  804.12   17.49
   3 -11  -6  778.76   17.45
  -3 -11   6  758.66   18.02
  -3 -11   6  776.86   18.07
  -3 -11   5   16.01    2.39
  -3 -11   5   16.80    2.38
   3 -11  -5   17.85    2.39
   3 -11  -4 1304.14   24.81
  -3 -11   4 1274.82   24.14
   3 -11  -3   32.87    3.08
  -3 -11   3   39.41    3.02
   3 -11  -2 1121.41   22.74
  -3 -11   2 1253.24   21.34
   3 -11  -1   10.27    2.01
   3 -11   0 2737.07   44.10
   3 -11   1  191.97    7.78
   3 -11   1  183.04    7.31
   3 -11   2 3695.61   56.00
   3 -11   2 3585.81   54.16
   3 -11   2 3588.39   56.03
   3 -11   3   19.79    2.59
   3 -11   3   21.20    2.38
   3 -11   4 2117.63   35.73
   3 -11   4 2080.62   34.15
   3 -11   4 2053.01   35.48
   3 -11   4 2007.78   33.70
   3 -11   5  440.37   11.46
   3 -11   5  446.60   12.60
   3 -11   5  444.09   11.67
   3 -11   5  440.35   12.38
   3 -11   5  445.48   11.44
  -3 -11  -6 1826.99   32.25
   3 -11   6 1901.03   32.33
   3 -11   6 1926.93   32.54
   3 -11   6 1890.50   34.01
   3 -11   6 1950.50   33.69
   3 -11   6 1869.42   31.89
  -3 -11  -7  289.91    9.41
   3 -11   7  302.28   10.51
   3 -11   7  303.39    9.53
   3 -11   7  305.69   10.14
   3 -11   7  295.17    9.22
  -3 -11  -8 2378.51   40.41
   3 -11   8 2459.43   40.57
   3 -11   8 2461.56   42.27
   3 -11   8 2470.79   40.28
   3 -11   8 2439.11   41.36
   3 -11   8 2452.37   39.73
  -3 -11  -9   92.57    5.42
   3 -11   9  101.41    5.73
   3 -11   9   95.44    5.99
   3 -11   9  100.88    5.37
   3 -11   9   90.30    5.55
   3 -11  10 3848.63   59.17
   3 -11  10 3674.07   60.27
   3 -11  10 3807.90   57.17
   3 -11  10 3755.06   59.24
   3 -11  10 3787.42   58.07
   3 -11  11   58.81    4.63
   3 -11  11   63.60    4.03
   3 -11  12 2883.44   47.70
  -3 -11 -12 2840.43   46.73
   3 -11  12 2879.21   44.35
  -3 -11 -13  162.31    7.22
   3 -11  13  161.05    7.66
  -3 -11 -14 1584.29   28.60
   3 -11  14 1536.34   28.98
  -3 -11 -15  175.11    6.89
  -3 -11 -16 1127.41   20.27
   3 -11  16 1037.89   20.08
  -3 -11 -17   47.35    2.82
   3 -11  17   44.87    2.77
   3 -12 -18  396.25    8.29
   3 -12 -17  342.96    8.30
  -3 -12  17  288.43    7.03
   3 -12 -16  916.03   17.42
  -3 -12  16  860.05   16.54
  -3 -12  15  148.67    6.07
  -3 -12  14 2144.57   33.60
  -3 -12  14 2075.08   34.76
  -3 -12  13  321.06   10.43
   3 -12 -13  325.10   10.15
  -3 -12  13  337.04    9.84
  -3 -12  12 1429.61   27.69
   3 -12 -12 1405.19   26.64
  -3 -12  12 1423.99   26.24
  -3 -12  11  416.16   12.72
  -3 -12  11  413.22   11.66
   3 -12 -11  406.99   11.78
  -3 -12  10 1247.63   28.33
   3 -12 -10 1312.59   25.08
  -3 -12  10 1281.70   24.92
  -3 -12   9  635.06   18.21
  -3 -12   9  661.29   15.75
   3 -12  -9  664.30   15.57
   3 -12  -8 2467.57   40.94
  -3 -12   8 2406.07   43.47
   3 -12  -8 2305.59   42.20
  -3 -12   8 2474.00   40.44
   3 -12  -8 2411.01   39.51
  -3 -12   7  820.27   18.89
   3 -12  -7  807.97   17.01
  -3 -12   7  839.54   18.17
   3 -12  -7  790.52   17.71
   3 -12  -7  766.86   19.05
   3 -12  -7  727.20   16.83
  -3 -12   7  772.75   19.41
  -3 -12   6 2125.69   36.37
   3 -12  -6 2066.43   33.78
  -3 -12   6 2120.13   35.67
   3 -12  -6 2005.63   34.43
  -3 -12   6 2004.35   36.69
   3 -12  -6 2093.14   35.15
   3 -12  -6 2078.62   35.76
   3 -12  -6 1913.56   36.40
   3 -12  -5 1291.98   24.63
  -3 -12   5 1295.87   24.65
  -3 -12   5 1268.28   24.81
  -3 -12   5 1292.55   25.07
   3 -12  -4 1519.21   27.99
  -3 -12   4 1590.30   27.95
  -3 -12   4 1559.16   28.33
   3 -12  -3  660.21   15.75
   3 -12  -3  607.01   16.13
   3 -12  -2 2319.62   39.18
   3 -12  -2 2394.10   40.58
   3 -12  -1 1080.97   21.78
   3 -12  -1 1011.85   22.20
   3 -12   0 1266.65   24.76
   3 -12   1  957.65   20.47
   3 -12   2  892.19   19.67
   3 -12   2  933.04   20.61
   3 -12   3  318.72   10.41
   3 -12   3  316.11    9.53
   3 -12   3  316.86    9.45
   3 -12   3  321.20   10.68
   3 -12   4  738.55   15.80
   3 -12   4  735.55   17.36
   3 -12   4  707.63   15.91
   3 -12   4  717.41   17.37
  -3 -12  -4  721.41   16.18
  -3 -12  -5   60.75    4.23
   3 -12   5   64.64    4.16
   3 -12   5   61.18    4.52
   3 -12   5   59.57    4.04
   3 -12   5   61.06    4.11
   3 -12   5   64.53    4.64
  -3 -12  -6  303.00    9.74
   3 -12   6  287.81   10.23
   3 -12   6  299.27    9.55
   3 -12   6  289.48    9.29
   3 -12   6  304.94    9.66
   3 -12   6  313.83   10.59
  -3 -12  -7    3.75    1.76
   3 -12   7    4.95    1.84
   3 -12   7    5.59    1.79
   3 -12   7    3.90    1.59
   3 -12   7    1.75    1.45
   3 -12   8  118.37    5.70
  -3 -12  -8  110.68    5.91
   3 -12   8  116.09    6.39
   3 -12   8  117.77    6.04
   3 -12   8  113.15    6.41
   3 -12   8  103.37    5.58
   3 -12   9    3.95    1.91
   3 -12   9    2.57    1.59
   3 -12   9    2.97    1.52
  -3 -12  -9    4.82    2.07
   3 -12   9    2.31    1.47
   3 -12   9    1.90    1.51
   3 -12  10   19.65    2.61
  -3 -12 -10   22.57    3.06
   3 -12  10   18.60    2.87
   3 -12  10   19.58    2.52
  -3 -12 -11   23.11    3.11
   3 -12  11   24.00    3.28
   3 -12  11   21.67    2.64
   3 -12  12  233.32    9.06
   3 -12  12  234.85    7.70
   3 -12  13  166.17    7.48
   3 -12  14  443.17   12.39
  -3 -12 -14  487.37   12.58
  -3 -12 -15  141.16    5.97
  -3 -12 -16  512.70   11.47
  -3 -12 -17   89.90    3.35
  -3 -13  16  136.76    4.93
   3 -13 -15  171.47    6.37
  -3 -13  15  176.76    6.30
  -3 -13  14  256.77    8.51
   3 -13 -14  262.58    8.46
  -3 -13  14  264.74    7.96
  -3 -13  14  258.04    7.67
  -3 -13  13  173.01    7.29
   3 -13 -13  173.52    7.01
  -3 -13  13  175.95    6.78
  -3 -13  12  253.58    9.20
   3 -13 -12  249.00    8.69
  -3 -13  12  241.31    8.41
  -3 -13  11   28.01    3.38
   3 -13 -11   32.11    3.22
  -3 -13  11   30.85    3.19
  -3 -13  10  269.67   10.07
  -3 -13  10  260.01    9.12
   3 -13 -10  276.97    9.31
  -3 -13   9   11.09    2.22
   3 -13  -9   11.24    2.18
  -3 -13   8   27.20    3.64
  -3 -13   8   29.03    3.51
  -3 -13   8   28.36    3.16
   3 -13  -8   27.13    2.94
  -3 -13   7   37.81    3.53
   3 -13  -7   33.08    3.08
   3 -13  -7   29.46    3.73
  -3 -13   7   36.19    3.99
  -3 -13   7   37.71    3.78
  -3 -13   6  316.22   10.66
  -3 -13   6  294.20   10.00
   3 -13  -6  304.30   10.19
   3 -13  -6  290.59    8.86
   3 -13  -6  292.63   10.82
  -3 -13   6  314.51   11.09
   3 -13  -6  296.56    9.68
  -3 -13   5  266.68    9.56
  -3 -13   5  260.86    9.21
   3 -13  -5  276.31    9.49
   3 -13  -5  269.51    9.26
   3 -13  -5  247.39    9.75
  -3 -13   5  279.42    9.80
   3 -13  -4  645.46   15.63
  -3 -13   4  641.44   15.40
   3 -13  -4  612.95   15.58
   3 -13  -3  488.13   13.16
   3 -13  -3  453.26   13.10
  -3 -13   3  484.31   13.16
  -3 -13   3  483.48   12.57
   3 -13  -3  445.47   13.56
   3 -13  -2 1523.27   28.60
   3 -13  -2 1611.20   30.34
  -3 -13   2 1589.93   28.81
   3 -13  -1 1031.46   22.78
   3 -13  -1 1022.64   21.70
   3 -13  -1 1023.76   20.15
   3 -13  -1 1053.83   23.03
  -3 -13   0 1424.27   26.53
   3 -13   0 1332.13   26.40
   3 -13   0 1393.43   27.75
   3 -13   0 1358.89   24.81
   3 -13   0 1405.21   28.19
   3 -13   0 1349.69   25.86
   3 -13   1 1475.93   28.99
   3 -13   1 1622.71   26.56
   3 -13   1 1601.29   30.54
   3 -13   1 1498.98   27.33
  -3 -13  -1 1585.37   29.24
   3 -13   1 1609.64   28.70
   3 -13   2 1767.92   29.07
   3 -13   2 1738.97   32.76
   3 -13   2 1675.90   29.66
   3 -13   2 1635.29   31.36
  -3 -13  -2 1788.72   31.30
   3 -13   3 1010.94   20.77
  -3 -13  -3 1045.66   21.38
  -3 -13  -3 1005.01   20.70
   3 -13   3 1046.24   20.02
   3 -13   3 1007.06   22.72
   3 -13   3 1027.89   20.55
   3 -13   3 1071.20   23.24
   3 -13   3 1024.55   22.04
   3 -13   4  990.97   22.36
  -3 -13  -4  970.67   20.17
  -3 -13  -4  966.87   19.95
   3 -13   4  939.16   21.60
   3 -13   4  951.89   19.91
   3 -13   4  955.47   19.33
   3 -13   4  967.03   21.24
   3 -13   5 2801.12   45.29
  -3 -13  -5 2845.97   45.99
   3 -13   5 2878.48   47.38
   3 -13   5 2844.15   45.02
   3 -13   5 2865.92   48.63
   3 -13   5 2813.42   47.65
   3 -13   5 2816.37   45.40
  -3 -13  -6  693.66   16.50
   3 -13   6  699.72   17.49
   3 -13   6  681.94   15.90
   3 -13   6  677.54   15.99
   3 -13   6  666.07   15.88
   3 -13   6  694.26   18.32
   3 -13   6  688.73   17.53
   3 -13   7 1048.63   23.03
   3 -13   7 1044.75   23.28
  -3 -13  -7 1074.34   22.29
   3 -13   7 1081.88   21.90
   3 -13   7 1067.61   21.56
  -3 -13  -8 1145.03   23.21
   3 -13   8 1105.17   22.10
   3 -13   8 1111.40   23.91
   3 -13   8 1076.95   22.31
  -3 -13  -9  943.33   20.57
   3 -13   9  940.89   20.34
   3 -13   9  919.54   19.41
   3 -13   9  924.22   19.84
  -3 -13 -10  764.43   18.14
   3 -13  10  791.46   18.23
   3 -13  10  770.15   16.95
   3 -13  10  788.36   17.59
   3 -13  11 1214.09   22.91
   3 -13  11 1260.36   24.90
  -3 -13 -11 1223.51   24.68
   3 -13  12 1345.74   24.03
   3 -13  12 1362.02   26.50
  -3 -13 -12 1353.52   26.12
   3 -13  13  559.11   14.43
   3 -13  14  429.08   11.43
  -3 -13 -15  493.32   11.60
  -3 -13 -16  511.12   10.61
   3 -14 -16  111.11    4.24
  -3 -14  16  108.19    3.97
   3 -14 -15 1140.53   20.25
  -3 -14  15 1103.21   19.86
  -3 -14  14  147.30    5.41
   3 -14 -14  167.02    6.27
  -3 -14  14  161.02    6.29
  -3 -14  14  166.90    5.88
  -3 -14  13 1460.45   26.29
  -3 -14  13 1527.68   27.53
   3 -14 -13 1557.81   27.15
  -3 -14  13 1554.37   26.72
  -3 -14  12  284.59    9.69
   3 -14 -12  295.03    9.35
  -3 -14  12  296.62    9.27
  -3 -14  11 2175.33   38.06
   3 -14 -11 2228.32   37.17
  -3 -14  11 2237.71   37.21
   3 -14 -10  276.47    9.19
  -3 -14  10  269.51    9.25
   3 -14  -9 2139.50   36.13
  -3 -14   9 2144.50   36.81
  -3 -14   8  463.33   13.58
  -3 -14   8  448.22   12.71
   3 -14  -8  452.10   12.08
  -3 -14   7 2300.01   39.52
   3 -14  -7 2235.89   40.39
  -3 -14   7 2213.46   38.22
   3 -14  -7 2187.90   36.53
  -3 -14   6  509.31   13.83
  -3 -14   6  528.60   14.53
   3 -14  -6  498.50   12.30
   3 -14  -6  517.20   13.36
   3 -14  -6  508.74   14.96
  -3 -14   5 2297.55   38.76
   3 -14  -5 2178.21   38.42
   3 -14  -5 2317.99   38.48
  -3 -14   5 2281.93   39.16
   3 -14  -5 2164.63   39.98
   3 -14  -4  204.32    8.17
   3 -14  -4  198.40    8.30
  -3 -14   4  195.63    8.09
   3 -14  -4  207.42    8.97
  -3 -14   3 1712.92   30.72
   3 -14  -3 1723.82   30.75
   3 -14  -3 1554.95   30.66
  -3 -14   3 1651.40   29.86
   3 -14  -3 1619.53   31.72
   3 -14  -2  218.67    8.45
   3 -14  -2  206.16    8.89
  -3 -14   2  196.51    7.59
  -3 -14   2  197.80    8.12
   3 -14  -1 1933.68   36.05
   3 -14  -1 1923.13   34.65
  -3 -14   1 1960.16   34.63
   3 -14  -1 2051.16   36.84
   3 -14   0  557.78   14.94
   3 -14   0  563.01   12.40
   3 -14   0  572.94   13.88
   3 -14   0  573.58   15.97
   3 -14   0  601.42   16.41
  -3 -14   0  580.04   14.72
  -3 -14  -1  915.96   19.50
   3 -14   1  829.77   19.53
   3 -14   1  870.23   17.27
   3 -14   1  866.07   18.38
   3 -14   1  898.35   20.95
   3 -14   1  875.76   21.25
   3 -14   1  902.17   19.60
   3 -14   2  423.70   10.84
   3 -14   2  413.63   11.50
   3 -14   2  429.62   13.38
   3 -14   2  394.64   12.38
  -3 -14  -2  429.21   11.94
   3 -14   3  144.52    6.05
   3 -14   3  142.75    6.39
   3 -14   3  146.88    7.57
   3 -14   3  142.45    7.08
  -3 -14  -3  145.79    6.58
  -3 -14  -4  382.65   10.86
  -3 -14  -4  386.76   11.50
   3 -14   4  414.14   13.29
   3 -14   4  399.04   10.98
   3 -14   4  369.30   12.06
   3 -14   4  418.06   13.33
   3 -14   4  398.30   11.59
   3 -14   5  624.46   15.35
  -3 -14  -5  625.22   15.63
   3 -14   5  644.52   17.43
   3 -14   5  637.66   14.95
   3 -14   5  624.40   17.08
   3 -14   5  614.78   16.40
   3 -14   6    8.08    2.03
   3 -14   6    4.92    1.97
   3 -14   6   11.58    2.16
   3 -14   6   10.68    2.39
   3 -14   6   11.17    2.34
   3 -14   6    6.99    2.42
  -3 -14  -6    6.18    2.18
  -3 -14  -7  114.86    6.29
   3 -14   7  107.05    5.72
   3 -14   7  111.89    5.80
   3 -14   7  110.83    6.82
   3 -14   7  116.32    5.96
   3 -14   8   26.77    3.06
  -3 -14  -8   25.22    3.24
   3 -14   8   27.24    3.77
   3 -14   8   26.55    2.99
   3 -14   9   13.85    2.34
   3 -14   9   14.93    2.95
   3 -14   9   13.95    2.33
   3 -14   9   16.89    2.69
  -3 -14  -9   10.74    2.52
   3 -14  10   25.75    2.83
   3 -14  10   25.84    3.56
  -3 -14 -10   29.42    3.38
   3 -14  10   32.76    3.53
   3 -14  11  115.76    5.42
   3 -14  11  114.88    6.47
  -3 -14 -11  123.22    6.27
   3 -14  11  123.54    6.22
   3 -14  12   30.90    2.73
   3 -14  12   30.60    3.39
   3 -14  12   28.71    3.31
  -3 -14 -12   29.62    3.32
   3 -14  13   85.12    5.00
   3 -14  13   86.16    4.89
  -3 -14 -13   91.51    5.00
   3 -14  14   16.59    2.11
   3 -14  15  372.38    8.58
  -3 -15  15  229.24    6.60
   3 -15 -15  242.34    6.60
  -3 -15  14    2.38    1.05
  -3 -15  14    3.15    1.44
  -3 -15  14    2.53    1.26
   3 -15 -14    3.22    1.49
   3 -15 -13  147.52    5.88
  -3 -15  13  145.72    5.69
  -3 -15  13  137.40    5.46
  -3 -15  13  134.53    5.87
   3 -15 -12   26.77    2.82
  -3 -15  12   23.96    2.67
  -3 -15  12   23.87    2.61
  -3 -15  12   22.35    2.82
   3 -15 -11   19.25    2.64
  -3 -15  11   19.23    2.59
  -3 -15  11   16.08    2.66
   3 -15 -10  161.78    6.72
  -3 -15  10  156.44    6.85
  -3 -15   9    6.59    1.98
  -3 -15   9    6.62    2.24
   3 -15  -9    6.94    1.99
  -3 -15   8    7.17    2.01
  -3 -15   8    9.71    2.38
   3 -15  -8    8.66    1.98
   3 -15  -7   32.05    3.81
   3 -15  -7   28.36    2.86
  -3 -15   7   29.98    3.30
  -3 -15   7   34.55    3.73
   3 -15  -6   82.23    5.78
   3 -15  -6   88.88    5.09
  -3 -15   6   85.03    5.32
  -3 -15   6   93.62    5.77
   3 -15  -5   87.51    5.93
  -3 -15   5   93.48    5.76
   3 -15  -5   99.26    5.56
   3 -15  -5   83.80    5.17
   3 -15  -4   17.42    3.07
  -3 -15   4   17.39    2.77
   3 -15  -4   19.16    3.01
  -3 -15   4   17.97    2.68
   3 -15  -4   20.36    2.68
   3 -15  -3  755.57   19.30
  -3 -15   3  813.23   18.22
   3 -15  -3  802.10   19.05
  -3 -15   3  817.46   18.56
   3 -15  -3  802.76   18.38
   3 -15  -2    3.64    1.60
  -3 -15   2    2.56    1.59
  -3 -15   2    2.80    1.76
   3 -15  -2    2.42    2.01
   3 -15  -1 1131.33   23.45
  -3 -15   1 1140.99   23.20
   3 -15  -1 1093.95   24.58
   3 -15   0   23.68    2.92
  -3 -15   0   28.15    3.16
   3 -15   0   26.67    3.53
   3 -15   0   24.65    2.82
   3 -15   1 1914.64   34.17
   3 -15   1 1863.21   32.70
   3 -15   1 1824.63   33.93
  -3 -15  -1 1900.97   33.18
   3 -15   1 1871.52   30.98
   3 -15   1 1908.20   36.08
   3 -15   1 1940.61   35.78
   3 -15   2   31.33    3.41
   3 -15   2   28.31    2.81
  -3 -15  -2   27.55    3.04
   3 -15   2   29.84    3.29
   3 -15   2   34.59    3.27
   3 -15   2   32.62    3.88
   3 -15   2   28.67    3.65
   3 -15   3 3204.43   48.50
   3 -15   3 3183.25   49.66
  -3 -15  -3 3060.33   48.59
   3 -15   3 3318.53   53.01
   3 -15   3 2923.26   50.76
   3 -15   4   15.35    2.65
  -3 -15  -4   13.91    2.16
  -3 -15  -4   14.48    2.59
   3 -15   4   14.85    2.28
   3 -15   4   15.44    2.39
   3 -15   4   19.82    2.84
   3 -15   4   16.79    3.00
   3 -15   5 2465.74   40.12
   3 -15   5 2459.42   41.18
   3 -15   5 2544.05   43.98
   3 -15   6   33.95    4.01
  -3 -15  -6   30.68    3.45
   3 -15   6   28.81    3.06
   3 -15   6   39.33    3.62
   3 -15   6   32.94    3.36
   3 -15   7 3053.13   50.95
  -3 -15  -7 2972.08   48.53
   3 -15   7 2988.37   47.63
   3 -15   7 2987.69   47.83
   3 -15   7 2913.96   47.73
  -3 -15  -8  110.49    6.14
   3 -15   8  106.20    5.61
   3 -15   8  105.23    5.66
   3 -15   8  108.69    6.52
   3 -15   9 2403.28   42.04
   3 -15   9 2359.06   39.30
  -3 -15  -9 2452.39   40.90
  -3 -15 -10  124.18    6.29
   3 -15  10  119.94    6.03
   3 -15  10  117.91    6.43
   3 -15  10  117.55    5.59
  -3 -15 -11 2262.92   38.22
   3 -15  11 2328.14   38.25
   3 -15  11 2282.68   38.64
   3 -15  11 2282.36   36.57
  -3 -15 -12   29.45    3.15
   3 -15  12   23.84    2.91
   3 -15  12   27.45    2.91
  -3 -15 -13 1264.44   22.96
   3 -15  13 1235.39   22.91
   3 -15  13 1296.25   22.52
  -3 -15 -14    3.81    1.35
   3 -15  14    3.30    1.17
  -3 -16  14  177.08    5.11
   3 -16 -14  187.09    5.52
  -3 -16  13 1451.05   24.24
  -3 -16  13 1466.37   24.98
  -3 -16  13 1432.32   23.94
   3 -16 -13 1423.69   24.09
  -3 -16  12   25.28    2.58
  -3 -16  12   24.93    2.77
  -3 -16  12   26.08    2.53
   3 -16 -12   24.94    2.57
  -3 -16  11 2073.53   34.09
  -3 -16  11 1989.84   33.86
   3 -16 -11 2075.39   33.67
  -3 -16  10   34.54    3.24
   3 -16 -10   30.70    3.02
   3 -16  -9 2413.01   39.47
  -3 -16   9 2499.29   40.77
  -3 -16   9 2505.76   41.80
   3 -16  -8  122.69    5.59
  -3 -16   8  127.90    6.21
  -3 -16   8  136.35    6.87
  -3 -16   7 2560.84   43.23
  -3 -16   7 2721.16   44.76
   3 -16  -6    4.19    2.21
  -3 -16   6    9.21    2.37
  -3 -16   6    8.28    2.09
  -3 -16   5 2413.74   41.66
   3 -16  -5 2325.30   42.37
   3 -16  -4    6.96    2.25
   3 -16  -4    6.45    2.34
  -3 -16   4    5.03    2.03
  -3 -16   4    4.28    1.76
   3 -16  -3 2791.91   48.45
  -3 -16   3 2863.32   46.55
  -3 -16   3 2891.76   46.77
   3 -16  -3 2910.97   47.62
   3 -16  -2  116.16    6.75
   3 -16  -2  123.24    6.79
  -3 -16   2  106.69    5.64
  -3 -16   2  115.05    6.09
  -3 -16   1 1610.01   29.48
   3 -16  -1 1577.14   30.73
   3 -16  -1 1574.69   31.19
   3 -16   0    5.09    2.23
  -3 -16   0    6.23    1.87
  -3 -16  -1 1022.40   21.03
   3 -16   1 1028.80   23.30
   3 -16   1 1030.15   19.35
  -3 -16  -2   22.64    2.73
   3 -16   2   20.36    3.19
   3 -16   2   18.93    2.60
   3 -16   2   17.45    2.28
  -3 -16  -3  438.58   11.54
   3 -16   3  468.94   14.29
   3 -16   3  480.54   12.83
   3 -16   3  466.82   11.79
   3 -16   4   82.23    5.80
   3 -16   4   81.53    5.03
   3 -16   4   86.42    4.77
   3 -16   5  438.99   13.63
   3 -16   5  431.01   12.45
   3 -16   5  434.37   11.61
   3 -16   6  141.99    6.33
  -3 -16  -6  134.54    6.53
   3 -16   6  150.06    7.61
   3 -16   6  137.49    6.50
   3 -16   6  150.19    6.89
   3 -16   7   20.54    2.68
   3 -16   7   24.76    3.41
  -3 -16  -7   21.79    2.98
   3 -16   7   26.65    2.94
   3 -16   7   22.69    2.90
  -3 -16  -8    7.49    2.22
   3 -16   8   11.48    2.52
   3 -16   8    5.16    1.97
   3 -16   8    4.30    1.90
  -3 -16  -9    1.49    1.84
   3 -16   9    3.50    1.72
  -3 -16 -10    4.66    2.00
   3 -16  10    5.72    2.04
   3 -16  10    4.56    1.72
   3 -16  10    5.08    2.00
  -3 -16 -11  129.14    5.84
   3 -16  11  134.19    5.99
   3 -16  11  142.27    6.05
   3 -16  12    2.62    1.67
  -3 -16 -12    2.85    1.56
   3 -16  12    1.32    1.22
  -3 -16 -13  343.09    8.39
   3 -16  13  345.01    8.19
  -3 -17  14   24.04    1.86
  -3 -17  13   81.18    3.83
  -3 -17  13   73.86    3.37
  -3 -17  13   78.08    3.48
  -3 -17  12  179.60    6.06
  -3 -17  12  186.75    6.06
   3 -17 -11    4.47    1.48
  -3 -17  11    4.74    1.65
  -3 -17  11    3.24    1.38
   3 -17 -10   14.38    2.04
  -3 -17  10   15.22    2.21
  -3 -17  10   15.81    2.52
  -3 -17  10   16.51    2.36
  -3 -17   9   67.34    4.59
  -3 -17   9   66.15    4.29
  -3 -17   8  207.72    8.24
  -3 -17   8  199.84    7.67
  -3 -17   7   67.52    4.85
  -3 -17   7   67.21    4.53
  -3 -17   6  203.38    8.37
   3 -17  -6  196.82    8.36
  -3 -17   5  381.75   11.76
   3 -17  -5  361.46   10.20
  -3 -17   5  348.44   10.91
   3 -17  -5  358.74   11.81
  -3 -17   4  230.23    8.75
   3 -17  -4  249.25    8.61
  -3 -17   4  221.51    8.42
   3 -17  -4  216.38    9.05
  -3 -17   3  319.75   10.31
   3 -17  -3  323.69   11.39
  -3 -17   3  345.55   10.66
   3 -17  -3  352.72   10.99
   3 -17  -2  121.40    6.76
  -3 -17   2  131.15    6.27
   3 -17  -2  125.41    6.70
   3 -17  -1  257.71   10.03
   3 -17  -1  270.35   10.12
  -3 -17   1  271.09    9.20
  -3 -17   0  257.62    8.84
   3 -17   0  275.35   10.37
   3 -17   0  268.84   10.14
   3 -17   1 1259.62   26.50
   3 -17   1 1308.83   22.70
  -3 -17  -1 1253.96   24.04
   3 -17   2  292.72   10.77
   3 -17   2  298.55    8.61
  -3 -17  -2  272.22    8.67
   3 -17   3 2067.53   36.56
   3 -17   3 2046.35   32.72
   3 -17   4  838.47   19.82
   3 -17   4  802.61   17.02
   3 -17   5 1786.70   33.03
   3 -17   5 1711.30   29.86
   3 -17   5 1719.98   31.41
   3 -17   6  643.16   16.52
   3 -17   6  630.14   15.43
   3 -17   6  627.65   14.59
   3 -17   7 2500.73   41.51
   3 -17   7 2473.41   40.05
   3 -17   7 2478.36   39.24
   3 -17   8  850.77   18.59
   3 -17   8  815.45   17.45
   3 -17   8  832.25   17.41
   3 -17   9 1775.85   30.14
   3 -17   9 1857.55   31.03
  -3 -17 -10  230.83    7.34
   3 -17  10  238.45    7.84
   3 -17  11 1111.18   20.46
  -3 -17 -11 1078.73   19.14
   3 -17  11 1093.61   19.73
  -3 -17 -12  284.29    6.79
   3 -17  12  257.55    6.48
   3 -17  12  275.43    7.01
   3 -17  12  277.38    7.61
  -3 -18  12  725.55   13.61
  -3 -18  12  727.32   13.55
  -3 -18  11 1581.46   25.68
  -3 -18  11 1546.15   25.51
  -3 -18  10  894.42   17.24
  -3 -18  10  853.87   17.05
  -3 -18  10  851.25   17.46
  -3 -18   9 1231.18   22.52
  -3 -18   9 1232.56   22.56
  -3 -18   9 1193.04   23.04
  -3 -18   8 1511.20   26.78
  -3 -18   8 1486.49   27.53
  -3 -18   7 1141.08   22.26
  -3 -18   7 1122.28   22.80
  -3 -18   6  907.32   19.72
  -3 -18   5 1258.64   24.48
  -3 -18   5 1244.89   23.77
   3 -18  -5 1211.63   24.52
  -3 -18   4 1014.14   21.09
  -3 -18   4 1059.56   21.10
   3 -18  -4 1021.92   21.95
   3 -18  -4 1053.56   20.02
  -3 -18   3  423.63   11.56
  -3 -18   3  428.39   11.83
   3 -18  -3  428.01   12.76
   3 -18  -3  456.12   11.89
  -3 -18   2  966.50   19.94
   3 -18  -2  931.46   21.16
  -3 -18   1  388.82   10.91
   3 -18  -1  365.79   11.77
  -3 -18   1  380.21   10.61
   3 -18  -1  384.54   11.74
  -3 -18   0 1002.11   19.73
   3 -18   0  990.63   21.65
  -3 -18   0  948.08   19.01
   3 -18   0 1002.79   21.59
   3 -18   1  292.24   10.25
  -3 -18  -1  268.08    8.44
   3 -18   1  283.20   10.19
   3 -18   2  945.42   17.67
   3 -18   2  947.60   20.78
   3 -18   3  404.95   10.30
   3 -18   3  389.03   12.14
   3 -18   4  199.06    6.99
   3 -18   4  205.85    8.42
   3 -18   5   82.59    4.45
   3 -18   5   89.31    5.41
   3 -18   6   48.12    3.50
   3 -18   6   50.49    4.07
   3 -18   7   53.99    3.66
   3 -18   7   55.99    4.15
   3 -18   8    4.37    1.70
   3 -18   8    6.64    1.82
   3 -18   9   60.26    3.78
   3 -18   9   57.70    3.69
   3 -18  10    5.87    1.40
   3 -18  11   24.81    1.89
   3 -18  11   24.61    1.96
  -3 -19  11   16.63    1.65
  -3 -19  11   18.55    1.79
  -3 -19  11   18.53    1.81
  -3 -19  10   59.80    3.28
  -3 -19  10   53.63    3.22
  -3 -19  10   55.77    3.25
  -3 -19   9   16.63    2.11
  -3 -19   9   19.73    2.28
  -3 -19   9   20.34    2.30
  -3 -19   8   23.29    2.65
  -3 -19   8   27.54    2.62
  -3 -19   7   14.78    2.09
  -3 -19   7   14.93    2.33
  -3 -19   6  124.53    5.82
  -3 -19   6  127.72    5.88
  -3 -19   6  135.71    5.81
  -3 -19   5    5.93    1.93
  -3 -19   5    9.03    1.88
  -3 -19   5    5.47    1.74
   3 -19  -4  249.36    8.71
  -3 -19   4  268.72    8.79
  -3 -19   4  266.98    8.51
  -3 -19   3   76.04    4.36
   3 -19  -3   77.50    4.79
  -3 -19   3   74.97    4.49
   3 -19  -3   79.53    4.20
  -3 -19   2  926.23   18.59
   3 -19  -2  908.92   19.63
  -3 -19   2  918.97   18.69
   3 -19  -2  961.85   18.71
  -3 -19   1  469.09   11.59
   3 -19  -1  457.06   12.67
   3 -19  -1  485.13   12.29
  -3 -19   0 1358.21   24.15
   3 -19   0 1336.04   26.00
   3 -19   0 1417.60   25.98
  -3 -19  -1  374.38    9.66
   3 -19   1  382.83   11.38
   3 -19   1  398.47   11.54
   3 -19   2  870.74   18.92
   3 -19   2  851.00   18.84
   3 -19   3  238.45    7.14
   3 -19   3  238.05    8.63
   3 -19   3  240.77    8.72
   3 -19   4 1577.47   28.56
   3 -19   4 1577.02   26.32
   3 -19   5  751.48   16.53
   3 -19   5  741.19   15.06
   3 -19   6 1360.67   24.98
   3 -19   6 1405.24   23.98
   3 -19   7  777.45   15.99
   3 -19   7  788.93   15.62
   3 -19   8 1965.77   30.79
   3 -19   8 1923.19   30.58
   3 -19   8 1891.55   31.12
   3 -19   9  188.63    5.93
   3 -19   9  178.84    5.88
   3 -19   9  182.89    5.42
   3 -19  10  998.10   16.63
  -3 -20   9    6.10    1.35
  -3 -20   8 1642.65   27.26
  -3 -20   8 1775.39   27.28
  -3 -20   7   14.59    1.91
  -3 -20   7   16.68    2.04
  -3 -20   6 1906.14   32.38
  -3 -20   6 1962.68   32.31
  -3 -20   5   10.82    1.87
  -3 -20   5   13.13    2.03
  -3 -20   5   14.48    1.91
  -3 -20   4 1660.38   28.56
  -3 -20   4 1764.11   28.66
  -3 -20   3    2.69    1.41
  -3 -20   3    4.41    1.39
  -3 -20   2 1434.89   24.41
   3 -20  -2 1411.70   25.05
   3 -20  -2 1458.02   23.36
  -3 -20   1   55.46    3.39
   3 -20  -1   56.47    3.82
   3 -20  -1   62.89    3.63
  -3 -20   0  872.30   16.31
   3 -20   0  844.44   17.80
   3 -20   1   48.19    3.53
   3 -20   1   50.52    3.53
   3 -20   2  516.18   12.57
   3 -20   2  542.16   12.81
   3 -20   3   85.96    4.53
   3 -20   3   88.74    4.70
   3 -20   4  282.08    7.21
   3 -20   4  288.49    8.39
   3 -20   4  289.43    8.72
   3 -20   5   18.07    1.92
   3 -20   5   19.17    2.16
   3 -20   5   20.54    2.46
   3 -20   6   64.53    3.28
   3 -20   6   66.54    3.44
   3 -20   7    1.29    0.94
   3 -20   7    0.74    1.15
   3 -20   7    0.36    1.24
   3 -20   8    9.93    1.51
  -3 -21   7   55.72    2.80
  -3 -21   7   61.54    2.95
  -3 -21   6   78.23    3.47
  -3 -21   6   80.81    3.53
  -3 -21   5   10.95    1.58
  -3 -21   5    7.08    1.31
  -3 -21   4  139.76    4.81
  -3 -21   4  159.82    5.29
  -3 -21   3    4.91    1.34
  -3 -21   3    3.31    0.99
  -3 -21   2  750.48   13.94
   3 -21  -1    1.95    1.04
  -3 -21   1    1.78    1.02
   3 -21   0 1157.93   21.03
   3 -21   0 1335.34   20.62
   3 -21   1    7.85    1.51
   3 -21   1    9.48    1.58
   3 -21   2  601.60   12.59
   3 -21   2  646.76   11.97
   3 -21   3   26.50    2.13
   3 -21   3   34.90    2.56
   3 -21   4 1009.61   18.06
   3 -21   4 1326.02   19.99
   3 -21   5   52.06    2.88
   3 -21   6 1794.65   27.20
   4   0 -20    9.92    1.69
   4   0 -19    1.92    1.49
   4   0 -18   21.20    2.58
   4   0 -17    0.27    1.47
   4   0 -16  230.34    8.11
   4   0 -16  252.81    9.38
   4   0 -15    4.07    1.67
   4   0 -15    0.62    1.42
  -4   0  14  442.10   14.75
   4   0 -14  434.24   12.07
   4   0 -14  429.88   11.19
   4   0 -14  451.98   13.06
   4   0 -13    2.88    1.48
   4   0 -13    1.39    1.43
   4   0 -13    0.41    1.43
  -4   0  13    4.33    2.16
   4   0 -12  504.68   13.37
  -4   0  12  470.65   14.90
   4   0 -12  489.41   12.78
   4   0 -12  475.53   12.65
   4   0 -11    1.63    1.09
  -4   0  11    2.98    1.65
   4   0 -11    1.55    1.42
   4   0 -10 1727.70   29.76
   4   0 -10 1755.21   29.43
   4   0  -9    0.71    0.97
   4   0  -8 4538.94   64.91
   4   0  -7    2.63    1.05
   4   0  -6 3578.96   51.67
   4   0  -5    2.62    1.07
   4   0  -4 3498.54   49.61
   4   0  -3    3.16    0.97
   4   0  -1    1.64    0.78
  -4   0   1    6.51    0.96
   4   0   1    2.24    0.79
   4   0   2 4374.70   60.43
   4   0   3    2.02    1.06
   4   0   3    2.97    0.98
   4   0   3    4.29    0.70
   4   0   3    4.11    1.00
   4   0   3    0.86    0.98
   4   0   4 5132.27   72.22
   4   0   4 5345.22   72.49
   4   0   4 5175.32   73.43
   4   0   5    4.71    1.32
   4   0   5    2.31    1.06
   4   0   5    3.33    1.11
   4   0   6 5171.67   72.75
   4   0   6 5027.25   71.83
   4   0   6 5159.78   72.65
   4   0   7    2.42    1.09
   4   0   7    3.34    1.19
   4   0   7    1.82    1.11
   4   0   8 2032.58   33.70
   4   0   8 2029.88   33.03
   4   0   8 2091.24   33.81
   4   0   9    1.02    1.17
   4   0   9    0.20    1.00
  -4   0  -9    0.07    1.47
  -4   0 -10  159.16    7.08
   4   0  10  163.31    6.89
   4   0  10  162.38    6.69
   4   0  10  163.08    6.91
   4   0  11    2.38    1.37
   4   0  11    2.44    1.32
  -4   0 -11    4.68    2.06
  -4   0 -12 1907.88   34.56
   4   0  12 1893.53   34.23
   4   0  12 1807.64   33.39
   4   0  12 1944.03   34.48
  -4   0 -13    4.32    2.19
   4   0  13    3.03    1.61
   4   0  13    2.10    1.38
   4   0  13    2.34    1.59
  -4   0 -14  126.78    6.91
  -4   0 -15    2.80    2.11
  -4   0 -16   31.89    3.67
  -4   0 -17    2.09    1.98
  -4   0 -18    6.27    1.97
  -4   0 -19    1.90    1.09
   4   1 -20 1466.57   23.93
   4   1 -19  375.83    9.70
   4   1 -18 1661.20   28.56
   4   1 -17  119.04    5.66
   4  -1 -16 1985.01   34.25
   4  -1 -16 1985.42   32.62
   4   1 -16 2045.74   36.06
   4   1 -15   85.71    4.82
   4  -1 -15   91.69    5.26
   4   1 -15   99.18    5.81
   4  -1 -15   88.68    4.70
   4   1 -14 1670.16   29.68
   4  -1 -14 1672.77   30.49
  -4  -1  14 1630.84   33.82
  -4   1  14 1688.43   34.06
   4   1 -14 1721.74   31.56
   4  -1 -14 1706.24   29.23
   4   1 -13  180.34    7.14
   4  -1 -13  186.58    7.59
   4   1 -13  184.78    7.79
  -4   1  13  189.58    9.11
  -4  -1  13  185.29    9.04
   4  -1 -13  184.73    7.01
   4  -1 -12 1423.11   26.60
   4   1 -12 1399.86   25.89
   4   1 -12 1412.74   25.98
   4   1 -12 1391.72   26.72
  -4   1  12 1422.37   29.33
  -4  -1  12 1468.35   29.80
  -4   1  11  445.22   14.10
   4   1 -11  445.52   11.69
   4  -1 -11  449.93   12.07
   4   1 -11  460.62   11.82
  -4   1  10 1761.51   33.14
   4   1 -10 1735.72   29.67
   4  -1 -10 1732.93   30.26
   4   1 -10 1766.12   29.57
  -4  -1   9  210.86    8.41
   4   1  -9  222.26    7.13
  -4  -1   8 1278.65   25.37
   4   1  -8 1370.12   23.06
   4   1  -7   14.99    1.77
   4  -1  -6  618.62   12.88
   4   1  -6  612.18   12.37
   4  -1  -5   24.52    2.09
   4   1  -4 3117.79   43.59
   4  -1  -4 2995.48   44.31
   4  -1  -3   40.32    2.38
   4   1  -3   48.30    2.32
  -4   1   2  132.52    4.18
  -4  -1   2  125.22    3.59
   4   1  -2  126.10    3.72
   4  -1  -2  125.92    4.18
   4   1  -1   68.63    2.57
   4  -1  -1   66.30    2.87
  -4   1   1   68.22    2.81
  -4  -1   1   72.38    2.53
   4  -1   0  282.05    6.39
   4   1   0  285.89    5.91
   4  -1   1  559.66   10.43
   4   1   1  552.64    9.72
   4   1   2  232.52    5.59
   4  -1   2  248.08    6.19
   4  -1   2  240.38    5.42
   4   1   3   36.32    2.64
   4   1   3   37.11    2.20
   4  -1   3   38.44    2.52
   4   1   3   36.92    2.19
   4  -1   3   38.11    2.46
   4  -1   3   44.88    2.12
   4   1   4 1376.94   23.06
   4   1   4 1375.03   21.70
   4  -1   4 1342.62   22.35
   4   1   4 1395.50   23.16
   4   1   4 1327.42   21.53
   4  -1   4 1327.58   20.43
   4   1   5  655.93   13.39
   4   1   5  643.21   12.36
   4  -1   5  640.71   12.96
   4   1   5  663.53   13.50
   4  -1   5  617.22   10.90
   4   1   6  511.02   11.49
   4   1   6  478.74   11.31
   4  -1   6  499.59   11.14
   4   1   6  485.27   10.51
   4   1   7 1007.05   19.06
   4   1   7 1018.47   19.06
   4   1   7  997.64   18.13
   4  -1   7  992.73   18.68
   4   1   8 1744.08   29.05
   4   1   8 1667.41   28.20
   4  -1   8 1663.44   28.80
   4   1   8 1737.64   29.13
   4   1   9  119.45    5.56
  -4   1  -9  128.29    6.03
  -4  -1  -9  111.40    5.35
   4   1   9  118.75    5.27
   4  -1   9  116.29    5.51
   4   1   9  124.70    5.74
   4   1  10 1782.73   30.96
  -4   1 -10 1804.07   31.42
  -4  -1 -10 1627.03   29.75
   4  -1  10 1658.76   30.40
   4   1  10 1725.03   30.11
   4   1  10 1766.24   31.04
   4   1  11  102.46    5.67
  -4   1 -11  109.10    6.11
  -4  -1 -11  100.66    5.37
   4   1  11  100.04    5.37
   4  -1  11   95.24    5.49
   4   1  11  101.05    5.67
  -4   1 -12 3214.78   51.92
   4   1  12 3265.35   51.63
   4   1  12 3108.21   50.48
   4  -1  12 3057.79   50.97
   4   1  12 3246.90   51.70
  -4   1 -13   65.74    5.09
   4   1  13   67.98    4.90
   4  -1  13   63.18    4.76
   4   1  13   62.38    4.68
   4   1  13   69.88    4.97
  -4   1 -14 2271.79   40.07
  -4   1 -15   91.23    5.82
  -4   1 -16 2680.95   44.70
  -4   1 -17   65.33    4.55
  -4   1 -18 1569.83   27.18
  -4   1 -19  118.74    4.37
   4  -2 -20    8.82    1.52
   4   2 -20    8.20    1.57
   4   2 -19    7.59    1.79
   4  -2 -19   11.16    1.98
   4  -2 -18    9.81    2.08
   4   2 -18   13.39    2.21
   4  -2 -17   43.14    3.11
   4   2 -17   43.46    3.50
   4  -2 -16   78.50    4.89
   4  -2 -16   72.13    4.24
   4   2 -15   50.37    4.26
   4  -2 -15   39.88    3.94
   4  -2 -15   42.15    3.41
   4  -2 -15   47.23    3.95
   4   2 -14 1129.56   23.24
   4  -2 -14 1124.38   23.30
   4  -2 -14 1102.08   22.71
   4  -2 -14 1107.81   21.53
  -4  -2  14 1099.85   25.79
  -4   2  14 1034.54   25.08
  -4   2  13   13.38    2.89
  -4  -2  13   10.62    2.60
   4   2 -13   11.42    2.25
   4  -2 -13   13.56    2.44
   4   2 -13    9.49    1.90
   4  -2 -13   11.48    2.35
   4  -2 -13   14.43    2.23
   4  -2 -12  731.01   16.97
   4   2 -12  703.35   15.74
   4   2 -12  724.75   16.24
   4  -2 -12  709.73   16.24
   4   2 -12  733.62   16.99
   4  -2 -12  745.43   17.12
  -4   2  12  723.34   19.14
   4  -2 -11  404.99   11.43
   4   2 -11  375.63   10.43
   4   2 -11  387.12   10.67
   4  -2 -11  395.14   10.82
   4   2 -11  389.62   11.21
   4  -2 -11  396.76   11.30
  -4   2  11  394.66   13.10
  -4  -2  10 1568.74   29.97
   4   2 -10 1522.16   26.82
   4  -2 -10 1545.21   27.98
   4   2 -10 1570.30   27.06
   4  -2 -10 1576.52   27.03
  -4  -2   9 1655.56   30.67
   4   2  -9 1707.74   28.09
   4  -2  -9 1640.58   27.96
  -4  -2   8 2166.40   36.65
   4   2  -8 2211.45   34.07
   4  -2  -8 2118.25   33.83
  -4  -2   7 2371.97   39.46
   4   2  -7 2514.11   37.45
   4  -2  -6 2739.84   40.81
   4   2  -6 2705.12   39.67
   4  -2  -5 2058.82   32.16
   4  -2  -4 1968.55   30.53
  -4  -2   3 1656.31   24.38
   4   2  -3 1710.82   24.67
   4  -2  -3 1667.68   26.38
  -4   2   2 2056.21   30.82
  -4  -2   2 2078.92   28.81
   4  -2  -2 2132.53   30.98
   4  -2  -1 3042.66   42.02
  -4   2   1 2987.77   41.87
   4   2   0 5667.42   76.18
  -4   2   0 5797.79   78.08
   4  -2   1 2534.08   37.24
   4   2   1 2555.54   35.47
   4  -2   1 2590.19   36.77
   4   2   2 3679.17   50.49
   4  -2   2 3605.42   52.11
   4  -2   2 3738.81   51.46
   4   2   3 1155.94   19.93
   4   2   3 1129.66   18.03
   4  -2   3 1116.23   19.49
   4  -2   3 1091.88   19.50
   4   2   3 1136.93   18.07
   4  -2   3 1174.46   18.35
   4   2   4 3827.14   54.94
   4   2   4 3823.55   52.89
   4  -2   4 3731.71   54.61
   4   2   4 3879.50   55.09
   4   2   4 3694.49   52.73
   4  -2   4 3751.36   52.47
   4   2   5 1353.44   23.05
   4  -2   5 1324.90   22.90
   4   2   5 1369.64   21.49
   4   2   5 1347.15   23.15
   4   2   5 1306.63   21.25
   4  -2   5 1309.54   20.62
   4   2   6 4014.18   57.31
   4  -2   6 3927.10   57.39
   4   2   6 3908.67   55.65
   4   2   6 4040.03   57.41
   4  -2   6 3819.53   54.39
   4   2   7 1092.34   19.96
   4  -2   7 1053.13   19.99
   4   2   7 1064.32   18.84
   4   2   7 1074.08   19.92
   4   2   8 2578.42   39.87
  -4   2  -8 2512.72   40.22
   4  -2   8 2447.32   39.94
   4   2   8 2520.75   38.68
   4  -2   8 2440.85   39.71
   4   2   8 2550.44   39.92
   4   2   9  489.47   12.38
   4  -2   9  490.02   12.45
  -4   2  -9  501.22   12.90
  -4  -2  -9  455.16   12.02
   4  -2   9  501.76   12.72
   4   2   9  493.64   11.82
   4  -2   9  495.83   12.57
   4   2   9  500.61   12.51
   4   2  10  425.45   11.72
   4  -2  10  429.43   11.88
  -4   2 -10  415.38   12.02
  -4  -2 -10  418.96   11.94
  -4  -2 -10  390.48   11.17
   4  -2  10  416.99   11.88
   4   2  10  423.46   11.25
   4  -2  10  432.47   11.95
   4   2  10  423.43   11.73
   4  -2  11  289.74    9.88
   4   2  11  291.52    9.85
  -4   2 -11  290.72   10.10
  -4  -2 -11  294.15   10.05
  -4  -2 -11  274.23    9.24
   4  -2  11  284.19    9.89
   4   2  11  289.65    9.37
   4  -2  11  290.70    9.95
   4   2  11  295.31    9.90
   4  -2  12  189.07    8.07
   4   2  12  175.92    7.77
  -4   2 -12  193.27    8.34
  -4  -2 -12  199.79    8.36
  -4  -2 -12  178.32    7.54
   4  -2  12  186.96    8.16
   4   2  12  189.73    7.60
   4   2  12  185.00    7.99
   4  -2  12  185.17    7.98
   4  -2  13 1033.67   22.34
   4   2  13 1021.44   22.21
   4  -2  13  979.42   22.30
   4   2  13  983.73   21.25
  -4  -2 -13  972.36   21.05
  -4   2 -13 1054.47   22.62
  -4  -2 -13 1038.46   22.38
   4  -2  13 1045.69   22.46
   4   2  13 1025.17   22.25
  -4   2 -14  309.14   10.99
  -4   2 -15  205.95    8.68
  -4   2 -16   57.92    4.59
  -4   2 -17    9.88    2.40
  -4  -2 -17    9.66    2.34
  -4  -2 -18   33.07    2.95
  -4   2 -18   28.60    2.86
  -4  -2 -19   32.26    2.24
  -4   2 -19   34.46    2.34
   4   3 -20  344.97    8.08
   4  -3 -20  333.06    7.91
   4   3 -19 1133.52   20.23
   4  -3 -19 1107.15   20.07
   4   3 -18  519.84   12.28
   4  -3 -18  518.50   12.34
   4  -3 -18  491.52   11.06
   4   3 -17 1671.15   28.99
   4  -3 -17 1674.75   29.04
   4  -3 -17 1649.20   28.04
   4  -3 -16 1251.72   24.91
   4  -3 -16 1286.43   23.51
   4   3 -15 1614.76   30.38
   4  -3 -15 1637.93   30.63
   4  -3 -15 1613.00   28.64
   4  -3 -15 1614.16   30.12
  -4   3  14  921.25   22.82
   4   3 -14  958.03   21.00
   4  -3 -14  954.85   21.05
   4  -3 -14  976.78   19.82
   4  -3 -14  968.66   20.94
   4   3 -13 2551.02   42.73
   4  -3 -13 2588.39   42.98
   4  -3 -13 2622.86   41.64
   4  -3 -13 2563.04   42.93
   4   3 -12  830.18   18.45
   4  -3 -12  835.64   18.57
   4  -3 -12  839.63   18.76
  -4   3  12  822.68   20.85
   4  -3 -12  814.60   17.77
   4   3 -12  817.04   17.64
   4  -3 -11 1779.76   31.25
   4   3 -11 1744.27   31.11
   4  -3 -11 1790.35   31.70
   4   3 -11 1776.98   30.38
   4  -3 -11 1783.96   30.49
  -4  -3  11 1721.79   33.57
   4  -3 -10 1181.93   23.09
   4   3 -10 1181.15   21.91
   4  -3 -10 1199.75   22.03
  -4  -3  10 1187.62   24.85
   4  -3  -9 1279.96   23.92
   4   3  -9 1286.33   22.76
   4  -3  -9 1297.98   22.87
  -4  -3   9 1255.35   25.27
   4  -3  -8 1683.03   27.24
   4   3  -8 1661.04   27.16
   4   3  -7 1436.71   23.89
   4  -3  -7 1439.10   23.97
   4  -3  -7 1469.03   25.53
  -4  -3   7 1379.04   25.77
   4  -3  -6 1238.75   20.90
   4   3  -6 1232.35   20.85
  -4  -3   6 1205.84   22.37
   4  -3  -6 1240.97   22.06
  -4  -3   5 1081.39   19.95
   4  -3  -5 1124.94   19.86
  -4  -3   4   43.88    2.91
   4  -3  -4   46.01    2.92
  -4   3   3  280.17    7.35
  -4  -3   3  274.76    5.29
  -4  -3   3  259.34    6.87
   4  -3  -3  269.06    7.26
  -4   3   2  362.11    8.41
  -4  -3   2  342.53    7.64
   4  -3  -2  367.35    8.50
  -4   3   1   57.31    2.90
  -4  -3   1   54.78    2.30
   4  -3  -1   61.38    2.97
  -4  -3   0  262.06    4.92
   4   3   0  269.51    4.98
   4  -3   0  287.52    6.91
   4  -3   0  287.40    6.83
  -4   3   0  303.19    7.13
   4   3   1   46.41    1.67
   4  -3   1   40.33    2.48
   4  -3   1   42.35    2.53
   4  -3   2 1245.95   20.26
   4  -3   2 1243.68   19.75
   4   3   3  460.95    8.81
   4  -3   3  490.64   10.72
   4  -3   3  495.46    9.81
   4   3   3  476.41    8.87
   4   3   4  313.23    6.92
   4  -3   4  315.04    8.50
   4  -3   4  316.84    8.50
   4   3   4  306.79    6.85
   4   3   4  328.69    8.61
   4  -3   4  313.95    7.32
   4  -3   4  324.91    8.56
   4   3   4  325.11    8.55
   4  -3   5  657.24   13.90
   4   3   5  625.76   11.86
   4  -3   5  649.04   13.66
   4   3   5  663.80   13.83
   4  -3   5  639.63   12.03
   4   3   5  676.60   13.84
   4  -3   5  660.74   13.68
   4  -3   6  426.29   10.85
   4   3   6  425.63    9.21
   4   3   6  444.88   10.73
   4  -3   6  431.77   10.69
   4  -3   6  421.49    9.06
   4  -3   6  442.02   10.66
   4   3   6  431.23   10.61
   4  -3   7 1563.23   27.51
   4   3   7 1592.21   25.47
   4  -3   7 1616.64   27.14
   4   3   7 1593.25   27.02
   4  -3   7 1586.74   27.11
   4   3   7 1616.14   27.14
   4  -3   7 1526.64   24.78
  -4  -3  -8  918.04   18.71
   4  -3   8  952.19   18.88
   4   3   8  943.88   18.69
   4  -3   8  878.86   19.09
   4   3   8  961.20   17.66
   4  -3   8  942.74   21.04
   4  -3   8  967.17   18.90
   4   3   8  955.54   18.69
  -4   3  -8  945.77   19.11
  -4  -3  -9 1621.26   28.83
   4  -3   9 1681.01   29.21
   4   3   9 1647.12   28.96
   4  -3   9 1622.36   29.68
   4   3   9 1672.19   28.02
   4  -3   9 1576.79   31.31
  -4   3  -9 1656.23   29.49
   4   3   9 1659.41   29.00
   4  -3   9 1708.03   29.35
   4  -3  10  652.70   16.04
   4   3  10  665.22   14.75
  -4   3 -10  651.74   15.81
  -4  -3 -10  635.82   15.57
  -4  -3 -10  649.61   15.35
   4  -3  10  664.35   15.57
   4   3  10  646.31   15.29
   4  -3  10  664.96   15.63
   4   3  10  653.29   15.39
   4  -3  11 1963.74   35.99
   4   3  11 2060.51   34.33
  -4   3 -11 2056.66   35.96
  -4  -3 -11 2049.81   35.66
  -4  -3 -11 1975.14   34.81
   4  -3  11 2056.20   35.64
   4   3  11 2034.53   35.35
   4  -3  11 2056.37   35.64
   4   3  11 2050.27   35.44
   4  -3  12 1065.99   23.59
   4   3  12 1081.37   21.89
  -4  -3 -12 1080.81   22.40
  -4   3 -12 1106.68   23.37
  -4  -3 -12 1098.21   23.13
   4   3  12 1095.26   22.98
   4  -3  12 1121.91   23.21
   4  -3  12 1113.07   23.18
   4   3  12 1101.94   23.01
  -4   3 -13 1841.31   33.85
  -4  -3 -13 1832.41   33.63
   4  -3  13 1793.71   34.22
  -4  -3 -13 1784.00   32.60
   4  -3  13 1855.33   33.66
   4   3  13 1813.50   33.41
  -4   3 -14 1012.09   22.20
  -4  -3 -14  987.35   21.98
  -4  -3 -14  984.35   21.08
  -4   3 -15 1664.42   30.94
  -4  -3 -15 1652.26   30.85
  -4  -3 -15 1563.00   29.15
  -4  -3 -16  781.23   18.17
  -4   3 -16  805.07   18.42
  -4  -3 -17  756.43   16.84
  -4   3 -17  782.95   17.16
  -4   3 -18  700.95   14.53
  -4  -3 -18  686.36   14.26
  -4   3 -19  724.89   12.71
  -4  -3 -19  704.93   12.56
   4   4 -20    3.39    1.14
   4  -4 -20    2.30    1.05
   4  -4 -19    9.25    1.74
   4   4 -19    8.37    1.73
   4  -4 -18   29.65    2.56
   4   4 -18   27.41    2.74
   4  -4 -18   28.57    2.79
   4  -4 -17   65.77    3.98
   4   4 -17   64.77    4.10
   4  -4 -17   70.37    4.29
   4  -4 -16   28.42    3.27
   4   4 -16   28.54    2.96
   4  -4 -16   28.93    2.99
   4  -4 -16   25.39    2.79
  -4  -4  16   23.46    2.91
   4   4 -15  245.11    9.21
   4  -4 -15  257.54    9.48
   4  -4 -15  257.59    8.74
   4  -4 -15  252.69    9.46
  -4   4  14  129.48    7.63
   4   4 -14  137.64    6.70
   4  -4 -14  127.00    6.52
   4  -4 -14  134.85    6.25
   4  -4 -14  128.43    6.75
  -4   4  13  650.52   18.22
   4   4 -13  645.11   16.01
   4  -4 -13  647.08   16.17
   4  -4 -13  664.79   15.54
   4  -4 -13  655.93   16.47
   4   4 -12   29.64    3.18
   4  -4 -12   36.79    3.50
   4  -4 -12   34.14    3.49
   4  -4 -12   38.88    3.28
   4   4 -12   33.66    3.05
  -4  -4  12   30.35    3.88
  -4   4  12   33.92    4.09
   4  -4 -11  953.15   20.19
   4   4 -11  905.35   19.36
   4  -4 -11  935.62   19.61
  -4  -4  11  878.40   21.35
   4  -4 -11  935.54   18.85
   4   4 -11  928.39   18.74
   4  -4 -10  140.42    6.45
  -4  -4  10  139.41    7.14
   4   4 -10  141.44    5.77
   4  -4 -10  143.44    5.86
   4  -4  -9 2293.30   37.89
   4   4  -9 2294.40   36.16
   4  -4  -9 2293.02   36.25
  -4  -4   9 2233.56   39.24
   4  -4  -8  546.50   12.02
   4   4  -8  539.72   11.95
  -4  -4   8  535.79   13.87
   4   4  -7 4537.35   64.76
   4  -4  -7 4613.55   64.92
   4  -4  -7 4689.66   67.13
   4   4  -6  553.17   11.59
   4  -4  -6  566.01   11.72
  -4  -4   6  557.18   13.10
   4  -4  -6  554.45   12.93
   4   4  -5 6549.80   87.52
  -4  -4   5 6088.72   88.81
   4  -4  -4   41.72    2.91
  -4  -4   4   53.67    3.17
  -4  -4   3 4915.02   65.61
   4  -4  -3 5125.16   70.56
  -4  -4   3 4977.91   69.48
  -4   4   2 2017.47   30.64
   4  -4  -2 2042.10   30.66
  -4   4   1 8248.81  104.47
  -4  -4   1 7389.71  101.44
   4  -4   0 1727.28   24.29
   4  -4   0 1666.09   24.23
   4  -4   1 6418.67   88.29
   4  -4   2 2311.77   35.02
   4  -4   2 2285.64   34.75
   4  -4   3 3553.82   52.43
   4  -4   3 3630.26   51.35
   4   4   4  670.18   11.59
   4  -4   4  662.08   14.14
   4  -4   4  685.07   14.07
   4   4   4  678.07   14.02
   4  -4   4  668.40   13.91
   4   4   4  683.31   13.97
   4  -4   4  686.68   12.95
   4  -4   5 5378.98   77.64
   4   4   5 5299.12   73.82
   4   4   5 5564.72   77.18
   4  -4   5 5522.10   76.95
   4  -4   5 5456.66   76.80
   4   4   5 5556.58   77.00
   4  -4   5 5333.15   74.98
   4  -4   6   90.35    4.70
   4   4   6   91.28    3.53
   4   4   6   87.63    4.40
   4  -4   6   87.04    4.36
   4  -4   6   85.15    4.28
   4   4   6   85.56    4.32
   4  -4   6   86.68    3.70
   4  -4   7 4559.43   66.44
   4   4   7 4408.93   62.77
   4  -4   7 4423.87   63.23
   4  -4   7 4453.42   65.18
   4   4   7 4555.11   65.24
   4   4   7 4529.73   65.36
   4  -4   7 4443.44   65.20
   4  -4   8  418.24   10.97
   4   4   8  414.42   10.93
   4  -4   8  409.08   11.69
   4   4   8  420.94    9.82
   4  -4   8  419.41   11.03
   4   4   8  402.26   10.84
  -4   4  -8  414.45   11.23
  -4  -4  -8  419.13   11.26
   4  -4   8  406.04   12.51
   4  -4   8  422.40    9.86
   4  -4   9 3259.48   51.92
   4   4   9 3297.72   48.77
   4  -4   9 3288.92   50.69
   4   4   9 3243.91   50.56
  -4  -4  -9 3262.86   50.76
  -4   4  -9 3162.86   50.73
   4  -4   9 3278.07   53.52
   4  -4   9 3259.80   50.60
   4   4   9 3261.09   50.53
   4  -4  10  211.64    7.94
   4   4  10  207.65    7.82
   4  -4  10  215.52    8.69
   4   4  10  207.25    7.16
  -4   4 -10  210.69    8.16
  -4  -4 -10  209.38    8.12
  -4  -4 -10  218.70    8.13
   4  -4  10  199.39    9.27
   4  -4  10  210.16    7.89
   4   4  10  205.57    7.83
   4  -4  11  433.80   13.26
   4  -4  11  432.89   12.47
   4   4  11  444.14   12.57
   4  -4  11  442.79   12.54
   4   4  11  455.93   12.61
  -4   4 -11  437.66   12.76
  -4  -4 -11  446.38   12.74
  -4  -4 -11  433.04   12.50
   4   4  12   14.75    2.46
   4  -4  12   17.04    2.57
  -4  -4 -12   16.17    2.72
  -4  -4 -12   21.58    3.09
   4  -4  12   15.03    2.45
   4   4  12   16.08    2.54
  -4   4 -12   16.40    2.94
   4  -4  12   14.10    2.71
  -4  -4 -13  488.82   13.75
   4  -4  13  493.34   14.03
   4   4  13  514.26   14.29
   4  -4  13  496.31   15.05
  -4   4 -13  512.03   14.37
  -4  -4 -13  491.54   14.18
  -4  -4 -14   73.11    5.01
  -4   4 -14   79.77    5.45
  -4  -4 -14   78.45    5.44
  -4  -4 -15  206.73    8.23
  -4  -4 -15  219.32    8.82
  -4   4 -15  222.38    8.93
  -4   4 -16    3.06    2.03
  -4  -4 -16    1.48    1.93
  -4  -4 -16    1.69    1.64
  -4  -4 -17   29.58    3.07
  -4   4 -17   27.93    3.04
  -4   4 -18    2.32    1.38
  -4  -4 -18    3.59    1.41
   4   5 -19 1822.95   28.19
   4  -5 -19 1812.79   28.06
   4  -5 -18   15.14    2.02
   4   5 -18   15.79    2.14
   4  -5 -18   14.75    2.07
   4   5 -17 2332.39   36.32
   4  -5 -17 2322.79   36.41
   4  -5 -17 2255.62   36.08
   4  -5 -16   17.04    2.71
   4   5 -16   15.80    2.38
  -4  -5  16   15.23    2.46
   4  -5 -16   15.75    2.36
   4  -5 -16   14.15    2.33
   4   5 -15 2929.79   48.02
   4  -5 -15 2988.11   49.04
   4  -5 -15 2970.74   47.06
   4   5 -14   27.77    3.19
   4  -5 -14   28.62    3.26
   4  -5 -14   26.34    3.02
   4  -5 -14   22.31    3.08
  -4   5  13 3980.91   66.67
  -4  -5  13 3867.21   66.29
   4   5 -13 4137.79   63.08
   4  -5 -13 4152.56   63.39
   4  -5 -13 4288.15   62.97
   4  -5 -13 4155.26   64.32
   4  -5 -12    9.49    2.16
   4  -5 -12    4.73    1.84
  -4  -5  12    9.49    2.54
   4   5 -12    4.92    1.79
   4  -5 -12    8.27    2.00
   4  -5 -11 2064.97   35.87
   4   5 -11 2000.41   34.44
   4  -5 -11 2023.36   34.76
  -4  -5  11 1993.21   37.39
   4   5 -11 2023.99   33.66
   4  -5 -11 2030.99   33.83
  -4  -5  10   28.78    3.43
   4  -5 -10   28.14    3.05
   4   5 -10   27.23    2.58
   4  -5 -10   26.65    2.57
  -4  -5   9 1727.54   32.37
   4  -5  -9 1768.65   31.00
   4   5  -9 1739.10   29.08
   4  -5  -9 1769.87   29.22
  -4  -5   8   22.54    2.81
   4   5  -8   23.90    2.24
   4  -5  -8   28.67    2.42
   4  -5  -7 2364.47   38.95
  -4  -5   7 2422.23   39.35
   4   5  -7 2350.51   36.38
   4  -5  -7 2412.63   36.59
  -4  -5   6   26.81    2.65
   4  -5  -6   28.85    2.70
   4   5  -6   27.04    2.17
   4  -5  -6   27.97    2.22
  -4  -5   5 2131.33   34.46
   4  -5  -5 2125.30   34.75
   4   5  -5 2170.99   32.92
   4  -5  -5 2206.26   33.07
  -4  -5   4   12.64    1.76
   4  -5  -4   13.34    1.86
   4  -5  -3   21.24    2.21
  -4  -5   3   21.60    1.90
   4  -5  -2   97.52    4.24
  -4  -5   2   76.83    2.98
   4  -5  -1  628.35   12.52
   4  -5  -1  637.80   12.50
   4  -5   0  212.98    6.33
   4  -5   0  207.98    6.46
   4  -5   1   67.28    3.50
   4  -5   1   68.74    3.60
   4  -5   2  317.22    8.28
   4  -5   2  321.09    8.17
   4  -5   3  877.78   17.02
   4  -5   3  903.51   16.36
   4  -5   4  541.98   12.63
   4  -5   4  555.98   11.67
   4  -5   5 1749.88   29.26
   4   5   5 1785.48   29.49
   4  -5   5 1728.77   30.16
   4   5   5 1800.11   29.48
   4  -5   5 1768.17   29.26
   4  -5   5 1770.02   28.10
   4  -5   6   47.54    3.30
   4   5   6   46.38    3.27
   4  -5   6   47.10    2.90
   4  -5   6   45.99    3.22
   4   5   6   48.69    3.33
   4  -5   6   45.86    3.54
  -4  -5  -7 1898.20   32.03
   4  -5   7 1888.56   30.32
   4  -5   7 1885.98   31.88
   4   5   7 1955.92   32.17
   4  -5   7 1925.83   33.29
   4  -5   7 1863.91   32.70
   4  -5   7 1903.11   31.77
   4   5   7 1926.83   32.03
  -4  -5  -8   29.81    3.07
   4  -5   8   28.02    2.48
  -4   5  -8   27.58    3.01
   4  -5   8   28.10    2.78
   4   5   8   31.10    2.89
   4  -5   8   31.63    3.29
   4  -5   8   32.15    3.50
   4   5   8   27.25    2.73
   4  -5   8   28.57    2.77
  -4  -5  -9 1622.15   28.91
   4  -5   9 1587.98   26.94
  -4   5  -9 1532.06   28.45
   4  -5   9 1572.64   28.34
   4   5   9 1591.08   28.42
   4  -5   9 1576.89   30.33
   4  -5   9 1564.59   28.35
   4   5   9 1586.79   28.47
   4  -5   9 1576.50   30.05
   4  -5  10   36.87    3.78
  -4   5 -10   38.70    3.69
  -4  -5 -10   39.06    3.73
   4  -5  10   39.89    3.46
   4   5  10   38.88    3.41
   4  -5  10   39.88    4.31
   4  -5  10   37.15    3.33
   4   5  10   36.72    3.35
  -4  -5 -10   39.90    3.68
   4  -5  11 3442.72   57.00
  -4   5 -11 3459.74   55.17
  -4  -5 -11 3486.66   55.24
   4  -5  11 3455.40   54.92
   4   5  11 3539.01   55.13
   4  -5  11 3384.80   57.52
   4  -5  11 3495.84   55.02
   4   5  11 3538.87   55.16
  -4  -5 -11 3578.38   55.30
  -4   5 -12   54.51    4.55
  -4  -5 -12   52.84    4.51
   4  -5  12   59.23    4.93
   4  -5  12   52.95    4.23
   4   5  12   59.28    4.47
   4   5  12   56.50    4.43
   4  -5  12   55.68    4.40
  -4  -5 -12   56.42    4.46
  -4  -5 -13 2340.95   40.05
  -4  -5 -13 2334.85   40.58
  -4   5 -13 2321.80   40.47
  -4  -5 -14  139.77    6.79
  -4   5 -14  125.73    6.68
  -4  -5 -14  133.21    6.93
  -4  -5 -15 2550.24   42.39
  -4   5 -15 2562.30   43.00
  -4  -5 -15 2577.55   43.07
  -4  -5 -16    7.80    1.97
  -4  -5 -16    6.83    2.21
  -4   5 -16    6.65    2.15
  -4   5 -17 1701.38   28.62
  -4  -5 -17 1675.50   28.40
  -4  -5 -18   57.91    2.98
  -4   5 -18   56.55    3.00
   4  -6 -19   14.94    1.66
   4   6 -19   12.97    1.69
   4  -6 -19   13.79    1.64
   4  -6 -18    7.01    1.68
   4   6 -18    6.38    1.62
   4  -6 -18    4.60    1.55
   4   6 -17   32.60    2.91
   4  -6 -17   37.36    3.10
  -4  -6  17   32.93    2.88
   4  -6 -17   37.90    3.17
   4   6 -16   20.50    2.50
   4  -6 -16   19.68    2.53
  -4  -6  16   16.61    2.51
   4  -6 -16   21.04    2.66
   4  -6 -15  261.91    8.97
   4  -6 -15  264.72    9.90
  -4  -6  15  252.65    9.38
   4  -6 -14   84.09    5.06
   4  -6 -14   91.93    5.83
   4   6 -14   84.25    5.15
   4  -6 -14   82.19    5.18
   4  -6 -13  190.21    7.71
   4  -6 -13  181.51    8.21
   4   6 -13  178.41    7.49
   4  -6 -13  174.41    7.50
  -4  -6  13  167.50    8.77
  -4   6  13  176.25    9.05
   4  -6 -12  273.30    9.36
   4   6 -12  266.90    9.11
   4  -6 -12  270.02    9.32
  -4  -6  12  245.94   10.63
   4  -6 -12  280.84   10.09
   4   6 -11  748.62   16.92
   4  -6 -11  773.18   17.27
   4  -6 -11  808.61   18.56
  -4  -6  11  737.97   19.31
   4   6 -11  771.94   16.34
   4  -6 -11  771.02   16.45
  -4  -6  10   31.69    3.64
   4  -6 -10   32.08    2.76
   4   6 -10   31.55    2.70
   4   6 -10   29.05    2.90
  -4  -6   9 3751.67   60.24
   4   6  -9 3848.59   56.49
   4  -6  -9 3890.22   56.77
   4   6  -8    7.35    1.42
   4  -6  -8    7.02    1.43
  -4  -6   8    7.79    2.00
  -4  -6   7 5358.09   77.66
   4  -6  -7 5193.96   77.32
   4  -6  -7 5309.94   74.43
   4   6  -7 5271.90   74.15
  -4  -6   6   80.50    4.53
   4  -6  -6   78.91    4.58
   4   6  -6   81.12    3.69
   4  -6  -6   80.61    3.73
  -4  -6   5 6983.83   99.28
   4  -6  -5 7178.65  100.21
   4   6  -5 7134.72   97.37
   4  -6  -5 7216.05   97.57
   4  -6  -4  235.57    7.66
  -4  -6   4  232.32    6.94
   4   6  -4  248.28    6.64
   4  -6  -4  249.36    6.74
  -4  -6   3 5681.74   81.07
   4  -6  -3 6279.55   83.78
  -4  -6   2  791.37   13.67
   4  -6  -2  849.79   16.19
  -4  -6   1 7188.81   95.26
   4  -6   0  721.47   14.40
   4  -6   0  712.34   14.67
   4  -6   2  902.93   17.04
   4  -6   2  880.24   16.84
   4  -6   3 5482.12   77.03
   4  -6   3 5338.69   76.27
   4  -6   4 1275.35   23.33
   4  -6   4 1295.87   22.30
   4  -6   5 6001.83   85.92
   4  -6   5 5802.42   84.42
   4   6   5 6006.90   84.65
   4  -6   5 6132.05   83.95
   4  -6   6  360.72    9.88
   4   6   6  356.68    9.96
   4  -6   6  357.92    9.34
   4  -6   6  341.78    9.63
   4   6   6  354.42    9.90
   4  -6   6  354.36   10.70
  -4  -6  -7 3453.89   52.31
   4  -6   7 3468.75   50.68
   4   6   7 3475.60   52.36
   4  -6   7 3344.46   51.80
   4  -6   7 3328.99   53.54
   4  -6   7 3350.31   52.43
   4  -6   7 3288.13   51.58
   4   6   7 3422.21   52.14
  -4  -6  -8  385.33   11.05
   4  -6   8  366.10    9.80
  -4   6  -8  358.33   10.68
   4   6   8  373.66   10.78
   4  -6   8  363.57   10.55
   4  -6   8  368.59   11.68
   4  -6   8  389.11   11.59
   4   6   8  381.64   10.85
   4  -6   8  366.81   10.52
  -4  -6  -9 2980.85   47.21
   4  -6   9 2907.45   45.03
  -4   6  -9 2820.82   46.56
  -4  -6  -9 2926.16   47.10
   4  -6   9 2925.89   48.34
   4  -6   9 2923.70   48.65
   4  -6   9 2880.05   46.48
   4   6   9 2987.99   47.05
   4  -6   9 2824.19   46.24
   4   6   9 3003.54   46.88
   4  -6  10  266.88    9.32
   4   6  10  266.61    9.44
  -4  -6 -10  269.97    9.64
  -4   6 -10  264.68    9.44
   4  -6  10  273.13   10.47
   4  -6  10  261.84   10.27
  -4  -6 -10  283.98    9.72
   4  -6  10  259.71    9.24
   4   6  10  273.59    9.63
   4  -6  11 1008.38   21.63
   4   6  11 1024.56   21.88
  -4   6 -11 1005.52   21.87
  -4  -6 -11 1036.10   22.17
   4  -6  11 1021.77   23.71
   4  -6  11 1019.57   23.48
   4  -6  11 1010.68   21.78
   4   6  11 1034.85   22.08
  -4  -6 -11 1052.10   22.16
   4  -6  12   69.39    4.85
   4   6  12   70.86    4.99
  -4   6 -12   74.06    5.18
  -4  -6 -12   75.73    5.31
   4  -6  12   74.62    5.63
   4   6  12   76.34    5.17
   4  -6  12   70.61    4.90
  -4  -6 -12   74.99    5.14
  -4   6 -13  306.37   10.72
  -4  -6 -13  326.91   11.07
  -4  -6 -13  316.81   10.71
  -4  -6 -14    3.34    2.01
  -4   6 -14    2.71    2.07
  -4  -6 -14    1.72    2.07
  -4  -6 -15   97.80    5.55
  -4   6 -15   84.81    5.24
  -4  -6 -15   89.74    5.47
  -4  -6 -16   20.09    2.68
  -4  -6 -16   21.12    2.72
  -4   6 -16   19.12    2.67
  -4  -6 -17   29.38    2.49
  -4   6 -17   36.02    2.81
  -4  -6 -17   32.27    2.65
  -4  -6 -18   37.01    2.02
  -4   6 -18   42.09    2.14
   4  -7 -19  946.12   16.13
   4   7 -18  715.40   13.56
   4  -7 -18  721.28   14.29
   4   7 -17 1878.02   29.70
   4  -7 -17 1845.15   29.59
   4  -7 -17 1839.39   30.53
   4   7 -16  687.58   14.69
   4  -7 -16  679.20   14.67
  -4  -7  16  660.02   15.59
   4  -7 -16  687.22   15.56
   4  -7 -15 1771.30   33.11
   4  -7 -15 1794.31   31.38
   4   7 -15 1736.35   29.77
   4  -7 -15 1751.15   30.03
  -4  -7  15 1785.07   32.40
  -4  -7  14  776.90   18.52
   4  -7 -14  736.28   17.19
   4  -7 -14  734.45   18.56
   4  -7 -13 2881.79   47.59
   4  -7 -13 2782.96   45.54
   4   7 -13 2773.06   45.13
   4  -7 -12 1308.94   26.41
   4   7 -12 1254.62   24.30
   4  -7 -12 1255.54   24.43
   4  -7 -12 1322.89   25.25
  -4  -7  12 1204.47   27.65
   4  -7 -11  735.77   16.89
  -4  -7  11  734.68   19.40
   4   7 -11  747.97   16.58
   4  -7 -11  764.18   16.90
   4  -7 -11  781.55   17.46
   4   7 -10  613.52   13.66
   4  -7 -10  620.44   13.89
   4   7 -10  609.71   14.27
   4  -7 -10  640.98   14.69
  -4  -7  10  626.76   16.98
   4  -7 -10  615.02   15.14
  -4  -7   9 1444.22   25.44
   4   7  -9 1372.81   24.22
   4  -7  -9 1384.54   24.41
   4  -7  -9 1453.28   27.18
  -4  -7   9 1366.63   27.93
   4   7  -8  799.00   15.79
   4  -7  -8  824.56   16.05
   4  -7  -8  809.95   18.70
  -4  -7   8  800.61   18.81
   4  -7  -8  788.07   18.59
   4  -7  -7  721.98   14.25
   4   7  -7  705.94   14.02
  -4  -7   7  691.34   16.50
   4  -7  -7  724.42   16.66
   4  -7  -7  706.88   16.56
   4  -7  -6 1037.36   20.82
  -4  -7   6  982.30   20.13
   4   7  -6  998.22   17.71
   4  -7  -6 1018.53   17.94
  -4  -7   5 1031.89   19.93
   4  -7  -5 1054.94   20.91
   4  -7  -5 1078.30   18.41
   4   7  -5 1057.04   18.17
   4  -7  -4   11.58    1.95
  -4  -7   4   10.99    1.62
   4   7  -4   14.41    1.52
   4  -7  -4   12.20    1.48
   4  -7  -3  548.72   12.99
  -4  -7   3  542.45   11.03
   4  -7  -2    5.16    1.50
   4  -7  -2    3.59    1.32
  -4  -7   2    7.21    1.04
   4  -7  -1   51.02    3.38
   4  -7  -1   50.95    3.38
  -4   7   1   53.93    3.33
   4  -7   0   69.96    4.07
   4  -7   0   70.06    3.83
   4  -7   1   58.56    3.66
   4  -7   1   54.58    3.40
   4  -7   2  337.26    9.35
   4  -7   2  346.50    9.29
   4  -7   3  108.18    4.89
   4  -7   3  102.74    4.89
   4  -7   4  367.92    9.65
   4  -7   4  360.60   10.11
   4  -7   5  916.68   17.79
   4  -7   5  894.40   19.00
   4  -7   6  370.67   10.43
   4  -7   6  387.36   11.30
   4  -7   6  384.14   10.07
  -4  -7  -7 1895.09   32.50
   4  -7   7 1886.75   33.88
   4  -7   7 1865.40   32.65
   4  -7   7 1824.51   31.91
   4   7   7 1939.04   32.57
   4  -7   7 1921.83   30.95
   4  -7   7 1898.18   31.51
   4   7   7 1916.93   32.58
   4  -7   7 1849.30   32.13
   4  -7   8  286.09    9.74
   4  -7   8  269.90    9.02
   4   7   8  293.73    9.47
   4  -7   8  278.24    8.65
  -4  -7  -8  295.63    9.68
   4  -7   8  271.84   10.08
   4   7   8  283.21    9.41
   4  -7   8  276.56    9.18
   4  -7   9 1837.02   33.17
   4   7   9 1963.77   33.98
  -4  -7  -9 1938.60   33.74
   4  -7   9 1901.81   34.38
   4  -7   9 1834.90   33.03
   4   7   9 1951.50   33.80
   4  -7   9 1892.84   32.09
   4  -7   9 1882.98   35.30
  -4   7  -9 1819.05   33.19
  -4  -7  -9 1968.55   34.03
  -4  -7 -10  373.55   11.66
   4  -7  10  379.23   12.55
  -4   7 -10  352.05   11.37
  -4  -7 -10  383.46   11.91
   4  -7  10  361.36   11.28
   4   7  10  387.53   11.74
   4  -7  10  372.69   10.66
   4  -7  10  386.32   12.78
   4   7  10  393.67   11.91
   4  -7  10  375.45   11.53
  -4  -7 -11 2554.99   42.37
   4  -7  11 2420.34   41.67
  -4   7 -11 2427.56   41.75
   4   7  11 2534.97   42.33
   4  -7  11 2366.73   41.37
   4  -7  11 2459.82   44.05
  -4  -7 -11 2508.74   42.47
   4  -7  11 2437.85   43.99
  -4  -7 -12  908.71   20.20
   4  -7  12  844.67   21.19
  -4  -7 -12  886.84   20.21
  -4   7 -12  856.54   19.81
   4  -7  12  864.62   21.45
  -4  -7 -13 2787.49   46.09
  -4   7 -13 2721.50   45.76
  -4  -7 -13 2800.86   46.28
  -4   7 -14  500.78   13.66
  -4  -7 -14  515.97   13.92
  -4  -7 -14  536.51   14.24
  -4   7 -15 1409.33   26.02
  -4  -7 -15 1439.73   26.32
  -4  -7 -15 1423.12   26.98
  -4  -7 -16  440.44   10.70
  -4   7 -16  439.03   10.72
  -4  -7 -16  434.68   11.48
  -4  -7 -17 1261.23   20.18
  -4   7 -17 1251.50   20.25
  -4  -7 -17 1276.72   21.34
   4  -7  18  462.16    9.61
   4  -8 -19    9.98    1.35
   4  -8 -18    2.96    1.32
   4  -8 -17    7.21    1.55
  -4  -8  17   10.22    1.78
   4  -8 -17   10.99    2.04
   4  -8 -16   14.87    2.10
  -4  -8  16   15.07    2.40
   4  -8 -16   15.96    2.37
   4   8 -16   15.81    2.17
  -4  -8  15   78.76    5.13
   4   8 -15   74.36    4.16
   4  -8 -15   68.83    4.05
   4  -8 -15   73.70    4.70
   4  -8 -14  708.74   18.03
   4  -8 -14  701.20   16.58
  -4  -8  14  742.28   18.03
   4   8 -14  671.73   14.81
   4  -8 -14  691.25   15.08
   4  -8 -13  449.63   12.78
  -4  -8  13  473.64   14.23
   4  -8 -13  449.75   13.82
   4   8 -13  444.06   12.05
   4  -8 -13  446.27   12.25
   4  -8 -12  318.52    9.91
   4  -8 -12  334.34   10.71
   4  -8 -11 1154.15   22.39
  -4  -8  11 1120.17   25.99
   4  -8 -11 1200.44   23.61
   4  -8 -10 1141.00   21.92
  -4  -8  10 1192.34   22.49
   4  -8 -10 1195.75   24.40
  -4  -8  10 1161.82   25.82
   4  -8  -9  888.40   17.41
  -4  -8   9  927.91   19.01
   4  -8  -9  915.08   20.17
  -4  -8   9  903.68   21.31
   4   8  -8 1941.26   31.71
   4  -8  -8 2021.43   32.06
  -4  -8   8 2139.21   34.55
   4  -8  -8 2097.11   36.16
  -4  -8   8 1987.71   36.25
   4  -8  -8 1942.82   35.81
   4   8  -7 1791.47   28.88
   4  -8  -7 1812.57   29.10
  -4  -8   7 1818.65   32.89
   4  -8  -7 1811.17   32.70
   4  -8  -7 1746.18   32.67
   4   8  -6 2466.39   37.99
   4  -8  -6 2563.75   38.32
   4  -8  -6 2463.39   41.72
  -4  -8   6 2534.37   41.60
   4  -8  -6 2520.17   42.01
   4  -8  -5 2585.24   42.25
  -4  -8   5 2614.13   40.91
   4   8  -5 2530.65   38.07
   4  -8  -5 2632.72   38.37
   4  -8  -4 1380.39   25.64
  -4  -8   4 1423.69   24.11
   4   8  -4 1376.13   22.33
   4  -8  -4 1421.51   22.54
   4   8  -3 1073.46   18.26
   4  -8  -3 1105.70   18.45
  -4  -8   3 1132.80   18.93
   4  -8  -3 1105.01   21.48
   4  -8  -2 3887.84   59.00
  -4  -8   2 4024.87   55.35
   4  -8  -2 3984.27   59.42
   4  -8  -1 2194.33   36.38
   4  -8  -1 2334.77   36.87
   4  -8   0 2760.47   44.73
   4  -8   0 2972.45   44.47
   4  -8   1 2093.38   35.31
   4  -8   1 2198.08   34.87
   4  -8   2 2983.88   47.00
   4  -8   2 3084.92   46.67
   4  -8   3 2369.51   38.41
   4  -8   3 2409.44   38.38
   4  -8   4 5200.10   74.59
   4  -8   4 5274.62   75.12
   4  -8   4 5095.76   75.49
   4  -8   5 1312.06   23.55
   4  -8   5 1272.81   23.32
   4  -8   5 1284.66   22.92
   4  -8   6 2492.61   40.03
   4  -8   6 2541.05   39.63
   4  -8   6 2495.21   40.26
   4  -8   7 1648.35   28.68
   4  -8   7 1642.03   28.17
   4  -8   7 1605.32   29.27
   4  -8   8  949.62   20.43
   4  -8   8  945.92   18.79
  -4  -8  -8  942.71   20.19
   4  -8   8  935.19   19.32
  -4  -8  -9 1188.96   24.00
   4  -8   9 1212.91   24.93
   4  -8   9 1217.88   23.32
  -4  -8  -9 1248.87   24.51
   4  -8   9 1152.86   23.45
  -4  -8 -10 1832.36   33.34
   4  -8  10 1921.12   34.94
   4  -8  10 1866.65   32.24
  -4  -8 -10 1923.21   33.86
  -4  -8 -11  430.38   12.85
  -4  -8 -11  423.09   12.66
  -4   8 -11  403.73   12.33
   4  -8  11  438.83   13.89
  -4  -8 -12  547.52   14.67
  -4  -8 -12  521.72   14.19
  -4   8 -12  486.83   13.67
   4  -8  12  516.19   15.63
  -4  -8 -13  198.38    8.32
  -4  -8 -13  194.77    7.95
  -4   8 -13  189.11    7.77
  -4   8 -14  104.74    5.36
  -4  -8 -14  108.54    5.52
  -4  -8 -14  105.45    5.98
  -4  -8 -15   48.64    3.41
  -4   8 -15   45.37    3.29
  -4  -8 -15   46.08    3.87
  -4  -8 -16   48.87    2.79
  -4  -8 -16   49.13    3.64
  -4  -8 -17   23.26    2.14
   4  -8  18    1.72    0.81
   4  -9 -18 1094.26   19.10
   4  -9 -17  374.31    9.73
  -4  -9  17  340.84    9.00
   4  -9 -16 1305.85   23.75
  -4  -9  16 1230.85   23.47
   4  -9 -15  356.65   10.67
  -4  -9  15  365.99   11.36
  -4  -9  14 2284.93   39.04
   4  -9 -14 2216.42   37.34
   4  -9 -14 2214.43   39.17
   4  -9 -13  277.15    9.64
   4  -9 -13  267.27    8.15
  -4  -9  13  291.75   10.93
  -4  -9  12 3277.33   54.57
  -4  -9  11  218.87    9.98
   4  -9 -11  235.56    9.55
  -4  -9  11  254.44    8.59
  -4  -9  10 1703.28   29.42
  -4  -9  10 1493.28   31.79
   4  -9 -10 1507.07   28.68
   4  -9 -10 1651.29   31.05
   4  -9 -10 1694.49   30.05
  -4  -9   9  532.97   13.46
   4  -9  -9  483.14   13.06
  -4  -9   9  480.71   14.84
   4  -9  -9  517.61   14.22
   4  -9  -9  531.67   13.62
   4  -9  -8 1241.25   23.73
   4  -9  -8 1192.33   25.29
  -4  -9   8 1286.37   24.25
   4  -9  -8 1238.11   24.59
  -4  -9   8 1185.19   25.52
   4  -9  -7   69.83    4.92
   4  -9  -7   64.34    3.32
  -4  -9   7   74.77    4.73
  -4  -9   7   68.73    4.79
   4  -9  -6 1375.21   27.35
   4  -9  -6 1424.91   23.46
  -4  -9   6 1463.92   27.10
   4  -9  -5  120.26    6.02
   4  -9  -5  127.09    4.41
  -4  -9   5  139.14    6.52
  -4  -9   5  132.28    5.73
   4  -9  -4  660.19   15.48
   4  -9  -4  636.59   12.27
  -4  -9   3  222.48    6.31
   4  -9  -3  204.68    5.54
   4  -9  -2   37.01    3.21
   4  -9  -2   37.92    2.21
   4  -9  -1    5.64    1.60
   4  -9   0   21.11    2.64
   4  -9   1  109.01    5.59
   4  -9   2   93.62    4.74
   4  -9   2   72.04    4.53
   4  -9   3   30.91    3.12
   4  -9   3   25.45    2.64
   4  -9   3   27.43    2.64
   4  -9   4 1432.73   26.39
   4  -9   4 1469.91   27.34
   4  -9   4 1483.15   26.02
   4  -9   4 1395.40   25.49
   4  -9   5   30.57    2.95
   4  -9   5   30.42    2.89
   4  -9   5   27.25    2.89
   4  -9   6 1872.50   31.88
   4  -9   6 1839.49   32.47
   4  -9   6 1903.94   32.60
  -4  -9  -6 1909.90   32.74
   4  -9   7  193.92    7.48
  -4  -9  -7  186.42    7.60
   4  -9   7  184.83    7.60
   4  -9   7  191.33    7.18
   4  -9   8 1389.07   26.38
   4  -9   8 1447.26   25.90
   4  -9   8 1409.91   27.41
   4  -9   9  104.51    5.62
  -4  -9  -9  114.42    6.19
   4  -9   9  110.47    5.38
   4  -9   9  110.86    6.31
   4  -9  10 1085.43   22.16
   4  -9  10 1099.84   24.26
   4  -9  10 1125.26   24.30
  -4  -9 -10 1093.30   23.25
   4  -9  11  450.24   14.30
  -4  -9 -11  459.49   13.44
   4  -9  12 2061.32   38.61
  -4  -9 -12 2105.75   37.02
  -4  -9 -12 2059.92   34.97
  -4  -9 -13  413.76   12.46
  -4  -9 -13  406.87   10.87
  -4  -9 -14 2029.01   35.42
  -4  -9 -15  193.14    7.61
  -4  -9 -16 1630.93   27.75
   4  -9  17  206.69    6.21
  -4  -9 -17  228.14    6.02
   4 -10 -18   24.90    2.11
   4 -10 -17   45.52    3.15
  -4 -10  17   39.42    2.76
   4 -10 -16   45.70    3.49
  -4 -10  16   40.03    3.28
   4 -10 -15    6.68    1.91
  -4 -10  15    6.92    2.14
  -4 -10  14  246.26    9.39
   4 -10 -14  242.58    8.81
   4 -10 -13   18.27    3.06
  -4 -10  13   13.86    2.92
   4 -10 -12  715.00   18.33
  -4 -10  12  754.72   19.16
  -4 -10  12  723.22   16.52
   4 -10 -11    5.35    2.05
  -4 -10  11    6.91    1.92
  -4 -10  11    6.03    2.35
  -4 -10  11    3.57    2.10
   4 -10 -11   12.64    2.60
  -4 -10  10 1378.48   28.15
   4 -10 -10 1331.56   26.98
   4 -10 -10 1314.72   25.71
  -4 -10  10 1327.90   25.46
   4 -10  -9    2.27    1.70
   4 -10  -9    3.20    1.71
  -4 -10   9    7.04    2.14
   4 -10  -9    8.20    2.22
  -4 -10   8 1646.32   29.78
   4 -10  -8 1601.55   30.03
  -4 -10   8 1630.17   31.40
   4 -10  -8 1581.60   28.71
   4 -10  -8 1554.26   31.02
   4 -10  -8 1616.97   29.20
   4 -10  -7   20.62    2.60
   4 -10  -7   21.93    2.83
  -4 -10   7   20.97    2.82
   4 -10  -7   19.04    2.83
   4 -10  -7   17.08    2.77
   4 -10  -7   18.17    2.57
  -4 -10   7   25.42    3.15
   4 -10  -6 5310.88   84.12
  -4 -10   6 6112.07   84.89
   4 -10  -6 5482.27   84.53
  -4 -10   6 6020.45   84.18
   4 -10  -5    8.25    2.16
  -4 -10   5    7.49    2.07
  -4 -10   5   12.46    2.00
   4 -10  -5   13.65    2.38
  -4 -10   4 3204.33   46.12
  -4 -10   4 3306.20   49.99
   4 -10  -4 2752.59   48.22
   4 -10  -4 2866.90   48.17
   4 -10  -3    7.38    1.91
  -4 -10   3    5.90    1.96
   4 -10  -3    8.06    1.89
   4 -10  -2 4444.90   66.38
   4 -10  -2 4419.79   66.79
   4 -10  -2 4447.67   66.53
   4 -10  -1   58.44    4.02
   4 -10  -1   53.68    4.00
   4 -10  -1   54.10    3.98
   4 -10   0 5168.23   74.82
   4 -10   0 5249.42   75.25
   4 -10   1   58.35    4.08
   4 -10   1   50.01    4.05
   4 -10   1   46.32    3.65
   4 -10   1   52.44    3.84
   4 -10   2 7291.77  102.65
   4 -10   2 7028.07  103.11
   4 -10   2 7438.52  102.34
   4 -10   2 7041.88  101.38
   4 -10   3  340.66   10.27
   4 -10   3  333.48    9.82
   4 -10   3  342.74   10.68
   4 -10   3  335.63   10.60
   4 -10   4 3056.37   46.82
   4 -10   4 2933.65   47.05
   4 -10   4 2904.80   46.08
   4 -10   4 2934.52   48.08
   4 -10   4 2895.20   47.25
  -4 -10  -5  762.14   17.35
   4 -10   5  761.59   18.16
   4 -10   5  742.11   17.29
   4 -10   5  773.20   17.24
   4 -10   5  777.73   16.77
   4 -10   5  772.71   16.94
   4 -10   5  772.74   17.50
   4 -10   6 2147.38   36.16
   4 -10   6 2128.13   37.11
   4 -10   6 2200.63   36.86
   4 -10   6 2176.13   36.74
   4 -10   6 2072.66   36.68
  -4 -10  -6 2103.39   36.76
   4 -10   7   18.26    2.57
   4 -10   7   19.38    2.63
   4 -10   7   20.25    2.63
  -4 -10  -7   17.29    2.71
   4 -10   7   18.38    2.71
   4 -10   8 1674.57   30.98
   4 -10   8 1597.82   30.17
   4 -10   8 1647.46   31.34
  -4 -10  -8 1573.51   30.43
   4 -10   9   30.93    3.16
   4 -10   9   27.19    3.37
   4 -10   9   31.38    3.64
   4 -10   9   29.56    3.03
   4 -10  10  606.23   16.45
   4 -10  10  587.01   16.05
   4 -10  10  607.52   14.28
  -4 -10 -10  605.14   15.75
   4 -10  11   20.07    3.45
  -4 -10 -11   20.53    3.06
   4 -10  12  553.74   15.97
  -4 -10 -12  546.14   14.85
  -4 -10 -13    9.32    2.40
  -4 -10 -14  285.44    9.71
  -4 -10 -15    1.54    1.70
  -4 -10 -16  242.09    7.34
   4 -10  16  223.70    7.09
   4 -10  17    1.00    0.78
  -4 -10 -17    0.33    0.85
   4 -11 -18 1180.72   18.98
   4 -11 -17   33.33    2.59
  -4 -11  17   27.90    2.28
   4 -11 -16 1487.22   25.26
  -4 -11  16 1388.99   24.90
   4 -11 -15   37.68    3.28
  -4 -11  15   33.96    3.35
  -4 -11  14 1612.25   30.13
  -4 -11  13   21.95    3.19
   4 -11 -12 1141.69   23.52
  -4 -11  12 1187.57   25.39
  -4 -11  12 1173.59   23.08
   4 -11 -11   18.01    2.97
  -4 -11  11   14.92    3.05
  -4 -11  11   16.22    2.55
   4 -11 -11   16.64    2.67
  -4 -11  10 1255.16   24.58
  -4 -11  10 1184.61   26.72
  -4 -11  10 1251.44   27.15
   4 -11 -10 1223.97   25.97
   4 -11 -10 1249.37   24.69
  -4 -11   9   52.28    4.69
   4 -11  -9   52.13    4.50
   4 -11  -9   48.00    3.98
   4 -11  -9   43.10    3.65
  -4 -11   9   53.41    4.17
  -4 -11   8 1943.42   35.08
   4 -11  -8 1829.56   32.55
   4 -11  -8 1782.71   31.88
   4 -11  -8 1849.82   33.69
  -4 -11   8 1869.76   35.59
   4 -11  -8 1801.13   34.68
  -4 -11   8 1880.11   33.50
  -4 -11   7   12.77    2.74
   4 -11  -7    6.88    2.16
   4 -11  -7   11.24    2.23
  -4 -11   7   13.33    2.46
   4 -11  -7    5.65    1.94
  -4 -11   7   19.00    2.73
   4 -11  -7    8.57    2.05
   4 -11  -7    9.66    2.20
  -4 -11   6  835.16   18.03
   4 -11  -6  766.34   16.90
   4 -11  -6  755.39   17.35
  -4 -11   6  813.09   18.60
   4 -11  -6  754.51   18.50
   4 -11  -6  743.26   16.67
   4 -11  -6  730.51   18.30
  -4 -11   6  771.52   19.00
  -4 -11   5  455.76   13.10
   4 -11  -5  417.07   12.87
   4 -11  -5  416.69   11.62
   4 -11  -5  429.82   12.76
  -4 -11   5  445.60   13.24
   4 -11  -4  809.10   18.70
   4 -11  -4  802.42   18.06
   4 -11  -4  814.76   19.03
  -4 -11   3    5.10    1.92
   4 -11  -3    4.59    1.63
   4 -11  -3    6.64    1.90
   4 -11  -2    9.30    2.10
   4 -11  -2    6.46    1.79
   4 -11  -1   13.77    2.34
   4 -11  -1   16.84    2.52
   4 -11  -1   16.16    2.41
   4 -11   0  196.49    8.10
   4 -11   0  190.17    7.66
   4 -11   0  187.15    7.70
   4 -11   1   21.35    2.91
   4 -11   1   15.03    2.32
   4 -11   1   15.93    2.50
   4 -11   2  139.61    6.46
   4 -11   2  132.23    6.19
   4 -11   2  144.23    6.32
   4 -11   2  133.97    6.83
   4 -11   2  154.06    6.95
   4 -11   3  133.36    6.26
  -4 -11  -3  151.68    7.61
   4 -11   3  152.13    6.30
   4 -11   3  141.17    6.54
   4 -11   3  146.62    6.93
   4 -11   3  142.62    7.00
   4 -11   4 1169.24   22.87
  -4 -11  -4 1171.09   23.63
   4 -11   4 1177.79   23.47
   4 -11   4 1180.08   24.26
   4 -11   4 1158.62   23.21
   4 -11   4 1137.70   24.04
   4 -11   4 1203.05   22.91
   4 -11   5  119.07    5.88
  -4 -11  -5  130.73    6.49
  -4 -11  -5  129.88    6.95
   4 -11   5  121.49    6.20
   4 -11   5  127.37    6.72
   4 -11   5  125.24    6.20
   4 -11   5  119.12    6.37
   4 -11   5  124.53    6.10
   4 -11   6  804.27   17.90
  -4 -11  -6  794.06   18.48
  -4 -11  -6  859.96   19.36
   4 -11   6  809.02   18.54
   4 -11   6  803.33   19.53
   4 -11   6  813.66   18.42
   4 -11   6  790.76   18.66
   4 -11   6  836.69   18.50
   4 -11   7   44.22    3.71
   4 -11   7   42.62    3.85
  -4 -11  -7   42.92    3.97
   4 -11   7   47.52    4.05
   4 -11   8  670.75   16.96
   4 -11   8  692.95   17.03
   4 -11   8  678.52   15.89
   4 -11   8  654.37   16.58
  -4 -11  -8  660.65   16.67
  -4 -11  -9  138.12    7.00
   4 -11   9  141.13    6.38
   4 -11   9  128.76    6.74
   4 -11   9  135.82    7.08
   4 -11  10 1077.80   23.54
   4 -11  10 1056.85   21.11
   4 -11  11  163.87    8.17
   4 -11  12 1968.47   36.55
  -4 -11 -12 1941.69   35.02
  -4 -11 -13  235.68    8.90
   4 -11  14 1340.70   25.45
  -4 -11 -14 1411.60   26.02
   4 -11  15   86.60    4.47
  -4 -11 -15   86.69    4.66
  -4 -11 -16 1155.03   19.15
   4 -11  16 1021.88   18.41
  -4 -12  17    2.39    0.99
   4 -12 -17    4.19    1.24
  -4 -12  16  103.89    4.63
  -4 -12  15   12.12    2.20
   4 -12 -14  122.53    5.84
  -4 -12  14  119.60    6.10
  -4 -12  13  205.67    7.47
   4 -12 -13  201.95    7.86
  -4 -12  13  196.02    8.41
  -4 -12  12  380.57   11.11
   4 -12 -12  364.02   11.23
  -4 -12  12  391.73   12.60
  -4 -12  11   57.93    4.33
   4 -12 -11   62.47    4.52
  -4 -12  11   59.14    5.14
   4 -12 -10 1716.30   32.75
  -4 -12  10 1689.64   31.17
   4 -12 -10 1709.79   31.14
   4 -12  -9  179.86    8.22
  -4 -12   9  163.29    8.39
  -4 -12   9  172.75    8.42
  -4 -12   9  171.38    7.53
   4 -12  -9  169.56    7.40
   4 -12  -8  854.18   21.06
   4 -12  -8  893.90   19.43
  -4 -12   8  893.85   20.03
   4 -12  -8  878.93   20.29
  -4 -12   8  924.43   21.75
  -4 -12   8  966.51   21.57
   4 -12  -8  841.65   18.50
  -4 -12   7  749.69   19.10
  -4 -12   7  733.43   17.68
   4 -12  -7  714.33   17.26
   4 -12  -7  689.97   18.05
   4 -12  -7  694.10   16.31
   4 -12  -7  698.08   18.23
   4 -12  -7  700.84   16.09
  -4 -12   6 1229.41   26.14
  -4 -12   6 1236.54   24.92
   4 -12  -6 1182.31   23.69
   4 -12  -6 1189.53   25.32
   4 -12  -6 1171.02   25.17
   4 -12  -6 1177.79   23.01
   4 -12  -6 1177.98   23.01
   4 -12  -5 1101.67   21.48
   4 -12  -5 1070.58   21.93
   4 -12  -5 1121.63   24.08
   4 -12  -5 1095.17   23.75
  -4 -12   5 1166.77   24.09
  -4 -12   5 1168.32   24.40
   4 -12  -4 3603.64   58.01
   4 -12  -4 3689.98   59.95
   4 -12  -4 3731.03   59.50
  -4 -12   4 4005.69   60.53
  -4 -12   4 3921.45   60.03
   4 -12  -3  896.71   19.84
   4 -12  -3  842.54   19.72
  -4 -12   3  888.72   19.39
   4 -12  -2 3413.32   54.18
   4 -12  -2 3500.36   54.01
  -4 -12   1  861.40   19.89
   4 -12  -1  820.20   18.72
   4 -12  -1  807.58   18.83
   4 -12   0 3093.52   52.16
   4 -12   0 3199.47   51.66
   4 -12   0 3246.22   52.09
   4 -12   1 2017.72   35.39
   4 -12   1 1953.44   36.20
   4 -12   1 2014.19   35.30
   4 -12   1 1929.46   32.55
   4 -12   2 2027.09   35.69
  -4 -12  -2 1902.39   34.69
   4 -12   2 2084.79   35.54
  -4 -12  -2 2092.81   37.56
   4 -12   2 1930.41   34.79
   4 -12   2 1947.95   36.53
   4 -12   2 2053.96   33.42
   4 -12   3  520.95   14.31
  -4 -12  -3  554.03   15.25
   4 -12   3  525.37   13.12
   4 -12   3  539.51   14.12
   4 -12   3  514.91   13.67
   4 -12   3  512.07   14.84
  -4 -12  -3  509.85   14.15
   4 -12   4 1643.34   31.29
  -4 -12  -4 1747.77   32.72
   4 -12   4 1696.88   29.99
   4 -12   4 1699.85   30.86
   4 -12   4 1625.76   30.10
   4 -12   4 1673.79   30.48
   4 -12   4 1681.73   32.11
  -4 -12  -4 1632.47   31.13
   4 -12   5  197.49    8.51
   4 -12   5  202.81    7.95
  -4 -12  -5  197.18    8.69
   4 -12   5  185.65    8.29
   4 -12   5  190.65    7.93
   4 -12   5  193.14    7.95
   4 -12   5  195.55    7.77
  -4 -12  -5  191.63    8.24
   4 -12   6 1454.91   27.56
  -4 -12  -6 1439.93   28.09
  -4 -12  -6 1441.26   28.65
   4 -12   6 1492.92   28.36
   4 -12   6 1505.25   29.48
   4 -12   6 1507.04   28.33
   4 -12   6 1457.22   28.95
   4 -12   6 1514.72   28.13
   4 -12   7  721.19   17.31
   4 -12   7  711.94   17.39
   4 -12   7  721.55   16.77
   4 -12   7  724.63   18.42
   4 -12   7  719.11   17.91
  -4 -12  -7  727.84   17.78
   4 -12   8 1153.85   24.16
   4 -12   8 1180.82   23.28
  -4 -12  -8 1162.99   24.50
   4 -12   8 1199.24   25.57
   4 -12   9  382.05   12.13
   4 -12   9  357.55   10.72
  -4 -12  -9  366.00   11.93
   4 -12   9  350.43   12.22
   4 -12  10  449.83   13.61
   4 -12  10  440.75   11.82
  -4 -12 -10  438.18   13.24
   4 -12  10  437.89   13.71
   4 -12  11  146.18    7.54
   4 -12  11  135.70    7.14
   4 -12  12  445.28   13.45
   4 -12  12  437.36   12.71
  -4 -12 -13  108.63    5.78
   4 -12  13   93.25    5.24
  -4 -12 -14  124.70    5.83
   4 -12  14  116.46    5.29
   4 -12  15   10.87    1.65
  -4 -12 -15   12.49    2.03
   4 -12  16    1.59    0.84
  -4 -12 -16    2.52    1.05
  -4 -13  16  569.71   11.69
   4 -13 -15  686.59   14.39
  -4 -13  15  678.69   14.61
   4 -13 -14  695.37   15.22
  -4 -13  14  738.80   16.03
  -4 -13  13  907.18   20.11
   4 -13 -13  934.56   19.20
  -4 -13  13  915.51   18.43
  -4 -13  12  381.27   12.16
   4 -13 -12  372.33   11.08
  -4 -13  12  385.43   11.08
  -4 -13  11  666.49   17.55
   4 -13 -11  692.91   16.43
  -4 -13  11  706.53   16.56
   4 -13 -10  247.43    9.02
  -4 -13  10  246.13    9.14
  -4 -13   9  599.72   17.11
  -4 -13   9  612.40   15.68
   4 -13  -9  615.65   15.32
  -4 -13   8  502.46   15.20
   4 -13  -8  488.60   13.12
  -4 -13   8  469.77   13.61
   4 -13  -8  450.56   12.20
   4 -13  -7  133.05    6.18
  -4 -13   7  145.14    7.21
  -4 -13   7  149.80    7.94
   4 -13  -7  147.32    6.58
   4 -13  -6  734.82   16.55
   4 -13  -6  732.63   16.67
  -4 -13   6  766.58   18.53
  -4 -13   6  777.05   19.45
   4 -13  -6  745.19   18.79
   4 -13  -5  221.05    7.80
   4 -13  -5  234.10    8.47
   4 -13  -5  227.71    9.40
  -4 -13   5  224.48    9.65
  -4 -13   5  244.94    9.62
  -4 -13   4  165.75    7.96
   4 -13  -4  163.94    7.90
   4 -13  -4  166.12    7.37
  -4 -13   4  157.22    7.65
   4 -13  -4  166.92    7.87
   4 -13  -3   53.89    4.52
   4 -13  -3   59.84    4.72
   4 -13  -3   58.35    4.65
  -4 -13   3   53.48    4.39
   4 -13  -2   10.22    2.20
  -4 -13   2    4.37    2.04
   4 -13  -2    6.68    2.15
   4 -13  -2   12.09    2.74
  -4 -13   2   14.32    2.38
   4 -13  -1  102.62    6.02
   4 -13  -1  103.28    6.01
   4 -13  -1   95.67    5.93
  -4 -13   1  103.25    6.36
   4 -13   0    2.65    1.80
   4 -13   0    2.37    1.62
  -4 -13   0    4.94    2.16
   4 -13   1   19.03    2.69
   4 -13   1   22.85    3.16
  -4 -13  -1   17.91    3.00
   4 -13   1   15.34    2.61
   4 -13   1   17.20    2.31
  -4 -13  -2  161.95    7.13
   4 -13   2  175.02    7.76
  -4 -13  -2  167.96    8.20
   4 -13   2  178.56    7.83
   4 -13   2  159.94    7.98
   4 -13   2  165.54    6.60
   4 -13   3  234.76    8.92
  -4 -13  -3  230.58    9.00
   4 -13   3  241.35    9.15
  -4 -13  -3  260.64    9.97
   4 -13   3  227.60    9.77
   4 -13   3  246.08    8.42
   4 -13   4   51.78    4.26
  -4 -13  -4   54.65    4.61
   4 -13   4   59.37    4.44
  -4 -13  -4   57.52    4.65
   4 -13   4   66.57    4.89
   4 -13   4   55.63    4.73
   4 -13   4   57.61    4.20
   4 -13   5  267.98    9.38
  -4 -13  -5  255.73    9.83
   4 -13   5  260.43    9.55
  -4 -13  -5  260.04    9.67
   4 -13   5  259.08    9.91
   4 -13   5  258.01    9.14
   4 -13   5  268.12   10.43
  -4 -13  -6  249.13    9.70
   4 -13   6  246.33    9.20
   4 -13   6  239.85    8.90
   4 -13   6  242.13    9.90
   4 -13   6  238.53    9.57
   4 -13   6  247.05    9.05
   4 -13   7  234.02    9.53
   4 -13   7  237.04    8.74
  -4 -13  -7  233.81    9.46
   4 -13   7  227.71    8.89
  -4 -13  -8  615.32   16.28
   4 -13   8  603.20   14.93
   4 -13   8  601.45   16.39
   4 -13   9 1259.08   25.85
  -4 -13  -9 1274.17   26.08
   4 -13   9 1251.65   24.21
   4 -13   9 1270.25   26.24
  -4 -13 -10  743.49   18.27
   4 -13  10  776.87   18.47
   4 -13  10  743.11   18.14
  -4 -13 -11  776.01   18.42
   4 -13  11  775.28   18.10
   4 -13  11  798.40   18.88
   4 -13  12 1018.53   20.68
   4 -13  12 1012.54   21.96
   4 -13  13  621.23   14.01
   4 -13  13  613.80   12.32
   4 -13  14  645.97   13.33
  -4 -13 -15  580.96   11.42
   4 -13  15  516.44   10.58
   4 -14 -16   56.31    2.63
  -4 -14  16   49.79    2.53
   4 -14 -15  152.60    5.29
  -4 -14  15  155.48    5.57
   4 -14 -14   25.61    2.55
  -4 -14  14   23.18    2.19
  -4 -14  14   23.87    2.72
  -4 -14  13  503.09   11.92
  -4 -14  13  493.20   13.12
   4 -14 -13  514.27   12.46
  -4 -14  12   82.45    4.74
  -4 -14  12   74.11    5.14
   4 -14 -12   78.05    4.68
  -4 -14  11  522.51   13.65
   4 -14 -11  523.41   13.49
  -4 -14  10  423.03   12.28
  -4 -14  10  384.68   12.76
   4 -14 -10  421.66   11.92
  -4 -14   9 1173.35   24.12
  -4 -14   9 1170.02   25.41
   4 -14  -9 1175.40   23.39
  -4 -14   8  475.53   13.39
  -4 -14   8  470.90   14.40
   4 -14  -8  457.73   12.44
   4 -14  -7 1076.01   21.63
   4 -14  -7 1121.17   22.30
  -4 -14   7 1143.77   24.08
   4 -14  -6  198.54    7.44
   4 -14  -6  199.73    8.87
  -4 -14   6  209.68    8.81
  -4 -14   6  205.41    9.34
   4 -14  -6  192.20    7.51
   4 -14  -5 1203.74   25.67
  -4 -14   5 1244.25   25.58
  -4 -14   5 1183.84   25.82
   4 -14  -5 1183.28   23.45
  -4 -14   4  672.65   17.29
   4 -14  -4  672.88   17.64
   4 -14  -4  686.77   16.46
  -4 -14   3 2655.11   45.05
   4 -14  -3 2813.85   45.96
   4 -14  -3 2732.53   46.68
   4 -14  -2  629.07   16.82
   4 -14  -2  647.29   17.08
   4 -14  -1 2138.69   38.78
   4 -14  -1 2179.88   39.24
  -4 -14   1 2253.03   39.70
  -4 -14   0  466.45   14.08
   4 -14   0  450.60   13.59
   4 -14   1  943.28   22.21
   4 -14   1  965.44   19.18
   4 -14   1  958.36   21.63
   4 -14   2  317.77   11.69
  -4 -14  -2  344.83   11.67
   4 -14   2  318.09    9.63
   4 -14   2  338.55   11.27
   4 -14   3 2020.43   35.85
  -4 -14  -3 2071.54   36.15
   4 -14   3 1956.32   37.16
   4 -14   3 1965.22   33.48
  -4 -14  -4  938.17   21.28
   4 -14   4  959.07   21.04
   4 -14   4  977.91   23.01
   4 -14   4  985.33   20.34
   4 -14   4 1011.30   21.71
  -4 -14  -4  977.47   21.36
  -4 -14  -5 3433.87   55.04
   4 -14   5 3565.07   55.95
   4 -14   5 3616.69   56.58
  -4 -14  -5 3543.48   56.98
   4 -14   5 3564.95   55.34
  -4 -14  -6  108.58    6.47
   4 -14   6  112.78    6.00
   4 -14   6  108.76    5.92
  -4 -14  -7 1719.87   32.44
   4 -14   7 1700.24   31.09
   4 -14   7 1645.47   30.54
  -4 -14  -8  132.53    6.97
   4 -14   8  117.84    6.48
   4 -14   8  121.05    6.50
   4 -14   8  121.48    6.04
   4 -14   9  949.25   20.92
  -4 -14  -9  969.53   21.59
   4 -14  10   16.34    2.64
   4 -14  10   13.69    2.79
  -4 -14 -10   16.86    2.94
  -4 -14 -11  716.27   17.01
   4 -14  11  733.70   17.24
   4 -14  11  676.87   15.99
   4 -14  12    7.18    1.64
  -4 -14 -12    4.89    1.98
   4 -14  12    3.77    1.53
   4 -14  12    3.66    1.99
   4 -14  13  356.28    7.96
  -4 -14 -13  383.55   10.20
   4 -14  13  384.47    9.41
   4 -14  14   19.37    1.85
  -4 -15  15 1150.50   19.13
  -4 -15  14   15.89    2.07
   4 -15 -14   15.73    1.86
  -4 -15  14   16.44    1.70
  -4 -15  13 1170.44   22.43
   4 -15 -13 1194.05   21.43
  -4 -15  13 1233.16   21.78
  -4 -15  13 1230.76   21.19
  -4 -15  12   32.55    2.99
   4 -15 -12   29.55    2.86
  -4 -15  11 2267.97   37.25
   4 -15 -11 2180.44   36.47
  -4 -15  10   25.50    3.05
  -4 -15  10   26.96    3.54
   4 -15 -10   26.35    2.98
  -4 -15   9 1352.84   26.22
  -4 -15   9 1303.33   27.03
   4 -15  -9 1315.43   24.94
  -4 -15   8   33.93    3.56
  -4 -15   8   39.82    4.15
   4 -15  -8   34.86    3.32
   4 -15  -7  437.15   11.72
   4 -15  -7  435.75   11.46
  -4 -15   7  462.81   13.43
  -4 -15   7  445.20   14.01
  -4 -15   6   15.15    2.72
   4 -15  -6   13.80    2.27
  -4 -15   6   16.93    3.06
  -4 -15   5  389.76   12.75
   4 -15  -5  393.45   11.22
  -4 -15   5  401.03   12.65
  -4 -15   4    7.97    2.25
   4 -15  -4   12.51    2.44
   4 -15  -3  135.96    7.22
  -4 -15   3  141.30    6.78
   4 -15  -3  143.82    7.03
  -4 -15   3  155.95    7.58
   4 -15  -2   18.47    3.16
   4 -15  -2   15.01    2.60
  -4 -15   2   11.70    2.51
   4 -15  -1   45.23    4.38
  -4 -15   1   48.54    4.37
   4 -15  -1   47.00    4.19
   4 -15   0   20.30    3.12
   4 -15   0   18.05    2.77
  -4 -15   0   20.03    3.10
  -4 -15  -1  237.87    9.47
   4 -15   1  228.16    9.28
   4 -15   1  228.77    7.70
  -4 -15  -2   65.80    4.92
   4 -15   2   63.22    4.81
   4 -15   2   69.83    4.36
  -4 -15  -3  471.16   13.29
   4 -15   3  471.72   12.29
  -4 -15  -4   79.46    4.99
  -4 -15  -4   73.01    4.78
   4 -15   4   88.72    5.01
  -4 -15  -5  332.54   10.96
   4 -15   5  343.30   10.53
  -4 -15  -6   39.39    4.01
   4 -15   6   41.83    3.73
  -4 -15  -7 1058.80   22.91
   4 -15   7 1081.01   22.25
  -4 -15  -8   37.59    3.93
   4 -15   8   37.91    3.71
  -4 -15  -9 1051.18   22.22
  -4 -15 -10   11.33    2.43
   4 -15  11 1274.78   24.58
  -4 -15 -11 1260.62   23.94
   4 -15  11 1271.33   22.54
  -4 -15 -12   15.19    2.34
   4 -15  12   15.49    1.77
  -4 -15 -13  970.86   17.35
  -4 -16  14    1.74    1.04
   4 -16 -13  321.89    7.66
  -4 -16  13  324.63    8.85
  -4 -16  13  328.31    8.27
  -4 -16  12   19.48    2.27
   4 -16 -12   17.03    2.09
  -4 -16  12   19.39    2.26
   4 -16 -11  497.52   11.72
  -4 -16  11  515.08   13.22
   4 -16 -10   66.62    4.01
  -4 -16  10   65.52    4.67
  -4 -16   9 1335.46   26.23
  -4 -16   9 1383.75   25.72
  -4 -16   8   43.28    4.17
  -4 -16   8   50.79    4.09
  -4 -16   7 1270.63   26.64
  -4 -16   7 1359.30   26.28
  -4 -16   6   13.62    2.72
   4 -16  -6   13.24    2.17
  -4 -16   6   12.26    2.44
   4 -16  -6   10.83    2.59
   4 -16  -5 2068.01   34.29
  -4 -16   5 1989.86   36.37
   4 -16  -5 2091.34   37.71
   4 -16  -4   48.51    3.91
  -4 -16   4   49.04    4.16
   4 -16  -4   53.25    4.62
  -4 -16   3 2232.47   38.88
   4 -16  -3 2227.06   37.55
   4 -16  -3 2273.03   39.48
  -4 -16   2  322.96   11.08
   4 -16  -2  331.20   10.97
   4 -16  -2  327.44   11.33
  -4 -16   1 2453.66   41.98
   4 -16  -1 2413.43   42.33
   4 -16  -1 2464.03   42.48
  -4 -16   0   59.80    4.73
   4 -16   0   73.62    5.20
   4 -16   0   64.26    5.23
  -4 -16  -1 3423.60   55.38
   4 -16   1 3637.23   56.35
   4 -16   1 3556.31   56.99
   4 -16   1 3415.27   52.52
   4 -16   2   41.07    3.37
  -4 -16  -2   30.82    3.41
   4 -16   2   39.28    3.87
   4 -16   3 3009.36   46.40
   4 -16   3 3032.80   48.73
   4 -16   4   87.18    4.98
  -4 -16  -4   73.55    4.52
   4 -16   5 2303.20   38.21
  -4 -16  -5 2290.68   37.48
   4 -16   6  295.77    9.66
  -4 -16  -6  295.46    9.68
   4 -16   7 1045.44   21.31
  -4 -16  -7 1035.05   21.00
  -4 -16  -8    4.18    1.93
   4 -16   8    7.94    2.19
   4 -16   9 1100.34   22.04
  -4 -16  -9 1077.21   21.23
   4 -16  10    4.11    1.66
  -4 -16 -10    3.64    1.62
   4 -16  11  434.60   10.06
  -4 -16 -11  465.49   10.67
   4 -16  12   59.87    3.06
  -4 -16 -12   67.71    3.28
   4 -16  12   70.19    2.97
   4 -16  13  289.44    6.27
  -4 -17  12  620.42   13.12
  -4 -17  12  648.70   13.02
  -4 -17  12  631.52   12.51
  -4 -17  11 1016.46   19.86
  -4 -17  11 1067.09   19.98
  -4 -17  11 1079.77   19.73
  -4 -17  10  452.01   11.50
  -4 -17  10  413.71   11.39
  -4 -17   9 1124.44   21.60
  -4 -17   9 1002.63   21.18
  -4 -17   8  366.43   10.89
  -4 -17   8  328.18   10.65
  -4 -17   7  265.69    9.34
  -4 -17   7  242.74    9.16
  -4 -17   6  158.86    7.21
   4 -17  -6  142.43    5.61
   4 -17  -6  153.67    7.28
  -4 -17   6  145.71    6.94
   4 -17  -5   58.53    3.82
   4 -17  -5   66.33    4.91
  -4 -17   5   58.98    4.47
  -4 -17   4   16.17    2.69
   4 -17  -4   16.98    2.50
   4 -17  -4   23.28    3.14
  -4 -17   4   13.57    2.37
   4 -17  -3  167.69    6.94
  -4 -17   3  158.03    7.33
   4 -17  -3  171.68    7.81
   4 -17  -2  128.75    6.36
   4 -17  -2  124.54    6.61
  -4 -17   2  120.36    6.42
   4 -17  -1   10.15    2.45
  -4 -17   1    6.15    2.05
   4 -17  -1    6.18    2.18
   4 -17   0    2.43    2.07
   4 -17   0    2.42    1.68
  -4 -17   0    1.37    1.60
   4 -17   1   27.80    3.56
   4 -17   1   24.40    3.14
  -4 -17  -1   22.63    2.97
   4 -17   2   11.57    2.72
   4 -17   2    9.45    1.94
  -4 -17  -2    9.64    2.14
   4 -17   3  152.14    7.00
   4 -17   3  148.14    6.15
   4 -17   4   60.82    4.44
   4 -17   4   56.00    3.95
   4 -17   5  394.88   11.57
   4 -17   5  388.70   10.91
   4 -17   6   48.43    3.87
   4 -17   6   49.16    3.80
   4 -17   7 1149.19   21.92
  -4 -17  -7 1093.46   19.90
   4 -17   7 1147.68   21.96
  -4 -17  -8  183.12    6.06
   4 -17   8  188.23    6.84
   4 -17   8  188.52    7.18
   4 -17   8  184.73    7.20
  -4 -17  -9  857.62   15.67
   4 -17   9  862.84   17.76
   4 -17   9  854.06   16.66
   4 -17   9  824.14   16.98
   4 -17  10  161.61    5.46
  -4 -17 -10  157.97    4.94
   4 -17  10  155.17    5.49
   4 -17  11  765.11   13.51
   4 -17  11  748.59   13.48
  -4 -18  12  211.15    5.52
  -4 -18  11  309.10    7.80
  -4 -18  11  299.53    7.92
  -4 -18  10  250.56    7.57
  -4 -18  10  257.82    7.59
  -4 -18  10  248.24    7.60
  -4 -18   9  700.14   14.98
  -4 -18   9  694.07   14.77
  -4 -18   8  814.65   17.21
  -4 -18   8  798.15   16.91
  -4 -18   7 1368.00   25.68
  -4 -18   7 1413.07   25.53
  -4 -18   6 1154.99   22.07
   4 -18  -5 1548.56   28.84
   4 -18  -5 1485.07   25.57
   4 -18  -4 1123.19   22.75
   4 -18  -4 1099.12   20.20
  -4 -18   4 1099.54   22.52
   4 -18  -3 1115.46   22.62
   4 -18  -3 1083.70   20.53
  -4 -18   3 1082.68   22.24
   4 -18  -2 1434.81   27.25
   4 -18  -2 1412.79   25.58
  -4 -18   2 1411.48   26.76
   4 -18  -1  915.88   19.82
   4 -18  -1  906.03   19.12
  -4 -18   1  886.17   19.23
   4 -18   0 1960.55   33.75
   4 -18   0 1931.13   33.51
   4 -18   1  881.48   19.06
   4 -18   1  885.99   19.31
   4 -18   2 1092.12   21.46
   4 -18   2 1035.75   21.76
   4 -18   3 1008.28   19.75
   4 -18   3  932.80   18.00
   4 -18   4 1038.65   20.53
   4 -18   4  983.42   19.35
   4 -18   5  551.00   13.23
   4 -18   5  533.05   13.83
   4 -18   5  523.77   12.63
   4 -18   6  847.45   17.24
   4 -18   6  819.95   17.88
   4 -18   6  831.67   17.12
   4 -18   7  804.99   16.07
   4 -18   7  774.37   16.66
   4 -18   7  785.26   16.34
   4 -18   8  726.31   14.32
   4 -18   8  694.64   14.80
   4 -18   8  709.96   15.00
   4 -18   9  431.11    9.94
   4 -18   9  442.17    9.65
   4 -18  10  329.47    7.36
   4 -18  10  344.14    7.48
   4 -18  10  348.91    7.80
  -4 -19  10  354.04    8.41
  -4 -19  10  377.13    8.48
  -4 -19   9  173.38    5.23
  -4 -19   9  153.16    5.50
  -4 -19   8  349.40    9.60
  -4 -19   8  368.86    9.80
  -4 -19   7  119.68    5.50
  -4 -19   7  136.20    5.05
  -4 -19   7  124.04    5.53
  -4 -19   6  538.21   13.62
  -4 -19   6  659.69   12.73
  -4 -19   5  155.89    6.45
  -4 -19   5  151.18    6.46
   4 -19  -4  178.81    5.59
  -4 -19   4  187.17    7.11
   4 -19  -4  195.28    7.28
  -4 -19   4  172.46    6.97
   4 -19  -3   53.39    3.20
  -4 -19   3   54.07    3.92
   4 -19  -3   60.71    4.14
  -4 -19   3   54.49    3.84
   4 -19  -2  153.88    5.64
  -4 -19   2  131.23    5.73
  -4 -19   2  152.85    6.44
   4 -19  -2  147.92    6.41
   4 -19  -1    3.06    1.60
   4 -19  -1    3.81    1.34
  -4 -19   1    3.04    1.32
  -4 -19   1    3.41    1.58
   4 -19  -1    2.59    1.61
   4 -19   0   12.73    2.18
  -4 -19   0   13.75    2.16
   4 -19   0   14.95    2.37
   4 -19   1    6.44    1.82
  -4 -19  -1    5.80    1.65
   4 -19   1    7.84    2.02
   4 -19   2   26.23    2.94
  -4 -19  -2   20.86    2.14
   4 -19   2   24.86    2.73
   4 -19   3   56.91    4.01
   4 -19   3   64.63    4.03
   4 -19   4  114.94    5.18
   4 -19   5   64.20    4.09
   4 -19   5   66.82    3.79
   4 -19   6  288.52    8.53
   4 -19   6  302.15    8.10
   4 -19   7  140.86    5.31
   4 -19   7  145.99    4.99
   4 -19   8  869.48   15.63
   4 -19   8  873.63   15.13
   4 -19   9  323.51    7.14
   4 -19   9  322.86    6.88
  -4 -20   8  738.90   13.72
  -4 -20   8  731.14   13.68
  -4 -20   7   14.39    1.75
  -4 -20   6 1476.06   24.10
  -4 -20   6 1335.65   23.41
  -4 -20   5   86.63    4.31
  -4 -20   5   85.97    4.16
  -4 -20   4 1458.39   24.15
  -4 -20   4 1274.51   22.93
  -4 -20   3  103.96    4.80
   4 -20  -3   95.07    3.51
  -4 -20   3   90.42    4.10
   4 -20  -2 1816.22   28.32
  -4 -20   2 1867.22   30.50
   4 -20  -2 1918.99   30.76
   4 -20  -1  103.19    4.14
  -4 -20   1   99.10    4.61
   4 -20  -1  106.29    4.88
   4 -20   0 1876.27   28.88
   4 -20   0 1931.54   30.42
   4 -20   1   15.79    2.11
   4 -20   1   14.79    1.95
   4 -20   1   15.73    1.83
   4 -20   2 1721.40   27.63
   4 -20   2 1693.39   27.17
   4 -20   3   35.33    2.70
   4 -20   3   31.28    2.64
   4 -20   4 1093.98   18.95
   4 -20   4 1051.31   18.93
   4 -20   5   24.12    2.03
   4 -20   6  976.44   16.25
   4 -20   6  991.41   16.77
   4 -20   7   29.10    1.92
  -4 -21   5   26.09    2.01
  -4 -21   4  119.62    4.26
  -4 -21   3   29.19    2.19
  -4 -21   2   22.14    1.87
   4 -21   0   15.63    1.47
   4 -21   0   17.89    1.78
   4 -21   1    1.64    0.97
   4 -21   1    1.67    0.95
   4 -21   2   20.03    1.66
   4 -21   2   18.77    1.71
   4 -21   3    3.98    1.01
   4 -21   3    3.44    0.98
   4 -21   4  196.86    4.99
   5   0 -20 1000.42   16.88
   5   0 -19    1.37    1.43
   5   0 -18  584.04   13.43
   5   0 -16  813.90   17.92
   5   0 -16  842.12   19.66
   5   0 -15    1.58    1.70
   5   0 -15    2.27    1.87
   5   0 -15    2.82    1.52
   5   0 -14 1018.91   20.71
   5   0 -14 1043.95   22.12
   5   0 -14 1073.28   23.22
   5   0 -13    1.14    1.59
   5   0 -13    1.10    1.37
   5   0 -13    1.81    1.71
   5   0 -12  199.88    8.59
   5   0 -12  196.83    8.32
   5   0 -12  200.26    8.15
   5   0 -11    1.84    1.64
   5   0 -11    1.50    1.30
  -5   0  11    5.29    2.06
   5   0 -10    9.00    2.11
   5   0 -10    6.81    1.80
  -5   0  10    7.10    2.15
   5   0  -9    4.68    1.68
  -5   0   9    3.89    1.80
   5   0  -9    3.33    1.48
  -5   0   9    1.13    1.45
   5   0  -8   18.51    2.57
   5   0  -8   21.06    2.48
  -5   0   8   19.87    2.78
   5   0  -7    1.32    1.11
   5   0  -6  832.45   17.11
   5   0  -5    5.45    1.30
  -5   0   4 2120.42   32.03
   5   0  -4 2057.65   32.10
  -5   0   3    2.50    0.82
   5   0  -3    1.73    0.89
   5   0  -2 1614.56   25.23
  -5   0   2 1654.32   24.98
   5   0  -1    7.55    1.13
   5   0   0 4302.62   59.38
   5   0   1    1.13    0.74
   5   0   2 5143.43   70.85
   5   0   3    5.50    1.16
   5   0   4 6272.31   86.96
   5   0   5    3.72    1.42
   5   0   5    3.68    1.28
   5   0   6 3247.45   49.20
   5   0   6 3267.53   50.94
   5   0   6 3290.73   51.04
  -5   0  -7    2.36    1.74
   5   0   7    6.89    1.77
   5   0   7    2.11    1.25
   5   0   7    6.34    1.74
  -5   0  -8 2422.90   40.95
   5   0   8 2358.81   39.09
   5   0   8 2441.00   40.54
   5   0   8 2504.20   40.79
   5   0   9    1.97    1.38
  -5   0  -9    2.81    2.03
  -5   0  -9    4.00    1.88
   5   0   9    1.86    1.41
   5   0   9    2.60    1.33
   5   0  10 3252.85   52.92
   5   0  10 3326.67   53.25
   5   0  10 3126.89   51.05
  -5   0 -10 3178.12   53.18
  -5   0 -11    3.36    2.27
   5   0  11    0.50    1.60
   5   0  11    1.54    1.61
   5   0  11    4.16    1.79
   5   0  12 4409.92   68.47
  -5   0 -12 4442.54   68.43
   5   0  12 4395.17   68.15
  -5   0 -13    3.07    2.43
  -5   0 -14 2286.33   40.66
  -5   0 -15    2.53    2.05
  -5   0 -16 1961.99   33.93
  -5   0 -17    2.77    1.64
  -5   0 -18  560.93   11.28
   5   1 -20  554.37   10.78
   5   1 -19   37.14    2.85
   5   1 -18  856.03   17.39
   5  -1 -17   77.30    4.58
   5  -1 -16 1366.39   24.82
   5  -1 -16 1415.11   26.64
   5   1 -16 1380.86   25.55
   5   1 -16 1453.14   28.08
   5  -1 -15  192.37    7.33
   5   1 -15  190.88    7.60
   5  -1 -15  191.04    8.01
   5   1 -15  194.92    8.59
   5  -1 -14 2370.31   39.09
   5   1 -14 2343.94   39.77
   5  -1 -14 2371.01   40.73
   5   1 -14 2345.26   41.51
   5  -1 -13  188.10    8.19
   5   1 -13  175.79    7.69
   5   1 -13  188.42    7.92
  -5   1  13  159.58    8.87
   5   1 -13  181.43    8.24
   5  -1 -12 4614.97   69.77
   5   1 -12 4545.39   68.81
   5   1 -12 4528.15   68.73
  -5  -1  12 4322.26   71.71
   5   1 -12 4588.60   69.89
  -5  -1  11  415.69   13.77
   5   1 -11  449.89   12.72
   5  -1 -11  456.48   13.14
   5   1 -11  442.36   12.53
  -5   1  10 3477.24   56.49
  -5  -1  10 3368.97   55.96
   5  -1 -10 3461.74   54.68
   5   1 -10 3433.63   54.06
   5   1 -10 3447.36   53.54
  -5  -1   9  415.15   12.64
   5   1  -9  409.06   11.73
   5  -1  -9  417.57   12.05
  -5   1   9  395.92   11.49
   5   1  -9  408.84   11.30
  -5  -1   8 3533.70   54.18
   5  -1  -8 3432.97   53.45
   5   1  -8 3447.26   52.44
   5   1  -7  170.86    6.61
   5  -1  -6 2941.86   46.02
   5   1  -6 3118.28   46.89
   5  -1  -5  149.27    5.63
   5  -1  -4 4891.17   69.03
  -5  -1   4 4964.37   67.68
   5  -1  -3  352.45    8.48
   5   1  -3  346.36    7.84
  -5  -1   3  360.73    7.68
  -5   1   3  361.21    8.52
   5  -1  -2 3232.89   45.93
   5   1  -2 3142.43   44.89
  -5   1   2 3139.24   45.61
  -5  -1   2 3220.44   44.57
   5  -1  -1  709.61   13.04
   5   1  -1  715.95   12.35
   5  -1   0 2784.59   40.57
   5   1   0 2852.41   39.80
   5  -1   1  645.81   12.22
   5   1   1  668.70   11.54
   5  -1   2 2320.32   34.21
   5   1   2 2255.29   33.20
   5   1   3  173.53    5.18
   5  -1   3  171.53    5.65
   5   1   4  238.54    6.70
   5  -1   4  248.20    7.35
   5   1   5   36.28    3.15
   5   1   5   38.89    2.72
   5  -1   5   35.16    2.85
   5   1   6  107.25    4.72
   5  -1   6   93.81    4.81
   5   1   6   99.80    5.21
   5   1   6   94.82    5.14
   5   1   7    8.77    1.91
  -5  -1  -7    9.43    2.16
  -5   1  -7    8.42    2.27
   5   1   7    9.33    1.92
   5   1   7   11.40    1.79
   5  -1   7    9.96    1.80
   5   1   8   21.92    2.78
  -5   1  -8   10.97    2.46
  -5  -1  -8   10.00    2.18
   5   1   8   11.63    1.96
   5  -1   8    8.88    1.92
   5   1   8   21.83    2.80
  -5   1  -9  160.41    7.59
   5   1   9  144.20    6.40
   5  -1   9  146.55    6.74
  -5  -1  -9  142.72    6.82
   5   1   9  147.55    7.10
   5   1   9  147.63    7.06
   5   1  10    9.33    2.21
  -5   1 -10   15.67    3.10
  -5  -1 -10   13.46    2.54
   5   1  10    7.64    2.04
   5   1  10   12.53    2.20
   5   1  11   17.06    2.75
  -5   1 -11   19.47    3.42
  -5  -1 -11   17.30    2.84
   5   1  11   15.93    2.70
   5   1  11   13.62    2.35
   5  -1  11   14.39    2.46
  -5   1 -12  318.75   11.79
   5   1  12  322.92   11.72
   5   1  12  327.27   11.69
   5  -1  12  290.38   10.67
  -5   1 -13   15.21    3.17
  -5   1 -14  335.19   11.67
  -5   1 -15  111.11    6.37
  -5   1 -16  954.79   20.04
  -5   1 -17   48.10    3.50
  -5   1 -18  776.50   14.23
   5   2 -20  461.26    9.25
   5  -2 -20  451.25    9.09
   5   2 -19  264.49    7.51
   5  -2 -19  264.68    7.47
   5   2 -18  700.01   14.99
   5  -2 -18  689.00   14.90
   5  -2 -17  211.24    6.99
   5  -2 -17  220.44    7.99
   5   2 -17  228.85    7.98
   5  -2 -16  625.69   15.51
   5   2 -16  620.60   16.15
   5  -2 -16  602.07   14.09
   5  -2 -15  417.77   12.63
   5   2 -15  432.89   13.18
   5  -2 -15  413.56   11.58
   5   2 -14   55.89    4.14
   5  -2 -14   59.47    4.71
   5  -2 -14   56.35    4.24
   5   2 -14   59.65    4.77
   5  -2 -14   59.80    4.85
   5  -2 -13  103.43    6.25
   5   2 -13  106.20    5.73
  -5  -2  13   91.08    6.71
  -5   2  13   94.41    6.82
   5   2 -13  103.82    5.82
   5  -2 -13  103.02    5.83
   5   2 -13  115.91    6.52
   5  -2 -13  107.81    6.32
   5   2 -12    8.13    2.05
   5  -2 -12   13.46    2.73
  -5   2  12   15.86    3.12
  -5  -2  12    6.75    2.29
   5   2 -12   10.86    2.14
   5  -2 -12   10.02    2.15
   5   2 -12   11.02    2.50
   5  -2 -12    9.44    2.36
  -5  -2  11  170.48    8.47
   5  -2 -11  180.40    8.02
   5   2 -11  178.28    7.47
   5   2 -11  167.47    7.21
   5  -2 -11  167.79    7.24
  -5  -2  10    2.30    1.79
   5   2 -10    0.37    1.18
   5  -2 -10    0.30    1.22
   5   2 -10    1.82    1.56
   5  -2 -10    1.71    1.75
  -5  -2   9   15.86    2.60
   5  -2  -9   15.60    2.55
  -5   2   9   16.39    2.59
   5   2  -9   16.45    2.27
   5  -2  -9   16.54    2.25
   5   2  -9   17.96    2.54
  -5  -2   8   38.38    3.52
  -5   2   8   34.86    3.39
   5  -2  -8   37.83    3.52
   5   2  -8   39.00    3.17
   5  -2  -8   33.85    3.02
  -5  -2   7   34.17    3.14
   5   2  -7   31.90    2.84
   5  -2  -7   34.02    2.95
   5  -2  -6 2385.86   38.72
   5  -2  -6 2341.31   38.57
   5   2  -6 2478.71   39.01
  -5  -2   5  200.87    6.72
   5  -2  -5  189.82    6.60
  -5  -2   5  188.09    5.35
   5  -2  -4 1063.26   19.23
  -5  -2   4 1053.56   17.13
  -5  -2   3 1372.70   20.73
   5  -2  -3 1389.73   23.12
  -5   2   2  598.61   12.09
   5  -2  -2  623.43   12.27
  -5   2   1 1452.10   23.12
   5  -2  -1 1414.87   22.93
   5  -2   0 2129.72   32.07
   5   2   0 2134.76   30.32
   5  -2   1  361.84    8.40
   5   2   1  369.55    7.13
   5   2   2 2438.45   34.73
   5  -2   2 2453.15   36.77
   5  -2   3  447.19   10.31
   5   2   3  451.23    9.10
   5  -2   3  471.79    9.38
   5   2   4 4547.32   64.28
   5  -2   4 4694.15   66.27
   5   2   5 2634.78   39.66
   5  -2   5 2671.95   41.58
   5  -2   6 3055.03   48.72
   5   2   6 3219.35   49.11
   5   2   6 3211.26   49.00
   5   2   6 3017.06   46.08
   5  -2   6 3086.92   47.88
  -5   2  -6 3083.65   49.06
   5  -2   7 1557.60   28.85
   5   2   7 1637.54   29.00
  -5  -2  -7 1502.61   28.59
   5  -2   7 1532.08   28.54
   5   2   7 1574.13   28.64
   5   2   7 1554.44   26.50
   5  -2   7 1571.81   28.15
  -5   2  -7 1564.96   29.16
   5   2   8 4764.84   69.60
   5  -2   8 4703.94   69.73
   5  -2   8 4548.95   69.18
   5   2   8 4616.97   69.21
  -5  -2  -8 4339.51   68.93
   5   2   8 4645.60   67.19
   5  -2   8 4486.32   68.51
  -5   2  -8 4594.90   69.86
  -5  -2  -8 4570.83   69.59
  -5   2  -9  532.51   14.80
  -5  -2  -9  529.59   14.63
   5  -2   9  538.16   14.61
   5   2   9  527.76   14.41
  -5  -2  -9  498.65   14.02
   5   2   9  512.74   12.92
   5  -2   9  515.45   13.91
   5  -2   9  553.45   14.85
   5   2   9  523.05   14.35
  -5   2 -10 2370.61   41.31
  -5  -2 -10 2332.77   40.78
   5  -2  10 2361.50   40.95
   5   2  10 2322.61   40.58
  -5  -2 -10 2207.80   39.71
   5  -2  10 2229.23   39.88
   5  -2  10 2382.92   41.20
   5   2  10 2351.90   40.76
  -5   2 -11 1298.68   26.91
  -5  -2 -11 1253.08   26.45
   5  -2  11 1287.87   26.68
   5   2  11 1247.77   26.25
  -5  -2 -11 1192.04   25.12
   5  -2  11 1216.84   25.60
   5   2  11 1239.36   26.36
   5  -2  11 1303.14   26.88
  -5   2 -12  816.71   20.11
   5  -2  12  779.17   19.59
   5   2  12  776.89   19.46
  -5  -2 -12  763.72   18.28
  -5  -2 -12  788.04   19.69
   5  -2  12  763.48   18.86
  -5  -2 -13 1294.31   25.39
  -5   2 -13 1316.23   27.41
  -5   2 -14  836.40   20.02
  -5   2 -15  378.18   11.84
  -5   2 -16  856.14   18.17
  -5  -2 -16  805.22   17.83
  -5  -2 -17  279.34    8.23
  -5   2 -17  276.25    8.24
  -5  -2 -18  743.98   13.57
  -5   2 -18  767.20   13.75
   5   3 -20  181.24    4.83
   5   3 -19  444.31   10.14
   5  -3 -19  440.44   10.02
   5   3 -18  530.49   12.16
   5  -3 -18  512.32   11.96
   5  -3 -17  595.57   13.25
   5   3 -17  627.61   14.20
   5  -3 -17  614.83   14.11
   5  -3 -16  319.94    9.63
   5   3 -16  324.06   10.85
   5  -3 -16  315.67   10.86
   5  -3 -16  319.64   10.69
   5  -3 -15 1052.73   21.52
   5   3 -15 1071.13   23.13
   5  -3 -15 1080.17   23.40
   5  -3 -15 1068.56   23.01
   5  -3 -14 1106.15   22.33
   5  -3 -14 1077.51   23.54
   5   3 -14 1075.80   23.53
   5  -3 -14 1071.62   23.56
   5  -3 -13 1466.38   28.74
   5   3 -13 1422.76   28.25
   5  -3 -13 1413.10   28.24
   5   3 -13 1392.30   27.03
   5  -3 -13 1396.01   27.17
  -5  -3  13 1338.63   29.71
  -5   3  13 1317.77   29.94
   5  -3 -12 1969.14   35.82
   5   3 -12 1940.18   33.59
   5   3 -12 1956.94   35.22
   5  -3 -12 1996.15   35.51
   5   3 -12 1932.53   34.16
   5  -3 -12 1894.41   34.21
  -5   3  12 1928.00   37.76
   5   3 -11 1263.16   24.78
   5  -3 -11 1286.91   25.01
  -5  -3  11 1243.67   27.06
   5  -3 -11 1313.72   26.43
   5   3 -11 1253.86   24.58
   5   3 -10  679.52   16.00
   5  -3 -10  688.03   16.17
  -5  -3  10  645.47   17.43
   5   3 -10  677.99   15.98
   5  -3 -10  716.96   17.42
  -5  -3   9 2351.38   41.02
  -5   3   9 2333.29   39.32
   5   3  -9 2377.14   38.90
   5  -3  -9 2395.95   39.03
   5  -3  -9 2432.06   40.65
   5   3  -9 2337.56   39.09
  -5  -3   8 1748.20   31.60
  -5   3   8 1687.93   30.29
   5  -3  -8 1757.17   31.53
   5   3  -8 1686.33   30.33
   5   3  -8 1775.91   30.18
   5  -3  -8 1757.76   30.12
   5  -3  -7 2240.89   37.30
  -5  -3   7 2263.64   37.36
   5   3  -7 2203.91   36.28
   5  -3  -7 2237.84   36.37
   5  -3  -6 2504.54   40.94
   5  -3  -6 2534.37   40.55
   5   3  -6 2574.77   40.75
  -5  -3   5 5387.94   74.59
   5  -3  -5 5028.42   74.63
  -5  -3   4 2003.66   30.17
   5  -3  -4 1935.45   30.46
   5  -3  -3 5847.02   83.13
  -5  -3   3 6069.48   82.50
   5  -3  -2 2420.43   38.07
  -5  -3   2 2629.64   37.03
   5  -3  -1 3274.93   49.71
  -5  -3   1 3559.05   47.78
   5  -3   0  538.03   11.10
   5  -3   1 2566.85   38.25
   5  -3   2  407.18    9.57
   5  -3   2  407.93    9.14
   5  -3   3  923.47   17.50
   5  -3   3  927.78   16.50
   5  -3   4   92.04    4.47
   5  -3   4   89.50    3.82
   5  -3   5  856.23   17.50
   5  -3   6   59.54    4.03
  -5  -3  -6   64.20    4.48
  -5   3  -6   64.79    4.42
   5  -3   6   63.53    4.22
   5   3   6   67.21    4.33
  -5   3  -7   67.73    4.75
   5  -3   7   73.43    4.61
   5   3   7   64.77    4.39
   5  -3   7   71.94    4.66
   5   3   7   69.12    4.50
   5  -3   7   68.82    4.48
  -5  -3  -7   73.44    4.92
   5  -3   8    1.79    1.32
   5   3   8    2.66    1.43
   5   3   8    3.26    1.45
   5  -3   8    2.97    1.38
  -5  -3  -8    6.59    2.10
   5  -3   8    5.56    1.70
  -5   3  -8    3.19    2.06
  -5  -3  -8    3.97    2.14
   5  -3   9  116.23    6.30
   5   3   9  107.95    6.07
   5  -3   9   95.15    5.60
  -5  -3  -9  109.08    6.16
   5  -3   9  104.86    5.99
   5   3   9  112.51    6.09
  -5  -3  -9   97.62    6.00
  -5   3  -9  104.02    6.22
   5  -3  10  109.84    6.31
   5   3  10  105.26    6.08
  -5   3 -10  114.28    6.61
  -5  -3 -10   97.00    6.02
   5  -3  10   96.70    5.97
   5  -3  10  111.14    6.29
   5   3  10  109.03    6.12
  -5  -3 -10  111.52    6.45
   5   3  11  343.63   11.73
   5  -3  11  350.22   11.95
   5  -3  11  334.59   11.66
   5   3  11  340.42   11.68
   5  -3  11  329.24   11.41
  -5  -3 -11  337.27   11.76
  -5   3 -11  346.82   11.99
  -5  -3 -11  327.37   11.29
   5  -3  12  200.46    8.91
   5   3  12  193.14    8.73
  -5  -3 -12  199.69    8.60
  -5  -3 -12  199.07    8.93
  -5   3 -12  213.26    9.32
   5  -3  12  195.37    8.67
  -5  -3 -13  421.32   13.39
  -5   3 -13  443.77   13.68
  -5  -3 -13  411.36   12.47
  -5  -3 -14  101.47    6.18
  -5   3 -14  104.26    6.30
  -5  -3 -14  102.63    5.63
  -5   3 -15  205.10    8.31
  -5  -3 -15  202.63    8.27
  -5  -3 -16  455.70   11.92
  -5   3 -16  450.38   11.98
  -5   3 -17  365.29    9.36
  -5  -3 -17  358.45    9.21
  -5   3 -18  575.98   10.72
  -5  -3 -18  549.43   10.48
   5   4 -19  704.11   13.45
   5  -4 -19  695.31   13.24
   5  -4 -18   90.99    4.11
   5   4 -18   99.70    4.66
   5  -4 -18   94.93    4.53
   5   4 -17  910.49   18.20
   5  -4 -17  924.25   18.23
   5  -4 -17  910.11   17.75
   5  -4 -16   38.83    3.84
   5  -4 -16   38.27    3.36
   5  -4 -15  395.91   12.63
   5   4 -15  421.10   12.73
   5  -4 -15  423.40   12.86
   5  -4 -15  405.81   11.76
   5  -4 -14   40.97    4.11
   5  -4 -14   44.56    3.97
   5   4 -14   42.89    4.02
   5  -4 -14   45.29    4.16
  -5   4  13    9.53    2.74
  -5  -4  13   10.19    2.65
   5  -4 -13   14.18    2.62
   5  -4 -13   16.07    2.77
   5   4 -13   19.02    2.90
   5  -4 -13    9.98    2.54
   5  -4 -12   13.43    2.75
   5   4 -12    8.95    2.01
   5  -4 -12   11.60    2.20
   5   4 -12   10.98    2.39
   5  -4 -12   10.72    2.42
  -5   4  12    9.89    2.65
  -5  -4  12    8.25    2.44
   5  -4 -11  114.78    6.62
  -5  -4  11  107.32    6.69
   5   4 -11  118.17    5.94
   5  -4 -11  105.77    5.74
  -5  -4  10   24.54    3.33
   5  -4 -10   24.43    2.83
   5   4 -10   25.15    2.78
   5   4 -10   25.41    2.86
   5  -4 -10   23.70    3.25
   5  -4 -10   27.31    3.36
  -5  -4   9   28.54    3.31
  -5   4   9   31.32    3.35
   5   4  -9   42.33    3.44
   5  -4  -9   39.29    3.31
   5   4  -9   28.23    3.01
   5  -4  -9   33.45    3.61
  -5   4   8    8.86    2.12
   5   4  -8    9.69    1.83
   5  -4  -8    9.81    1.83
   5   4  -8    9.27    1.99
  -5  -4   8    8.06    2.00
   5  -4  -7   36.96    3.39
  -5  -4   7   36.66    3.32
   5   4  -7   38.99    3.12
   5  -4  -7   41.63    3.24
  -5  -4   6  432.23   11.27
   5  -4  -6  402.81   11.23
   5   4  -6  412.41   10.81
   5  -4  -6  409.85   10.74
   5  -4  -5  842.33   17.73
  -5  -4   5  910.51   17.61
   5  -4  -4  400.14   10.32
  -5  -4   4  415.66    9.94
  -5  -4   3 1016.16   17.52
   5  -4  -3  981.94   18.55
  -5  -4   2  483.44    9.39
   5  -4  -2  461.57   10.78
   5  -4  -1 2292.92   35.14
   5  -4   0  323.96    8.28
   5  -4   1 3483.69   50.42
   5  -4   1 3440.57   50.34
   5  -4   2 1491.66   24.81
   5  -4   2 1520.97   25.12
   5  -4   3 2363.23   36.75
   5  -4   3 2429.23   37.49
   5  -4   4 1052.21   19.17
   5  -4   4 1098.14   20.45
   5  -4   5 3504.59   51.92
   5  -4   5 3651.41   54.27
  -5   4  -6  514.18   13.37
  -5  -4  -6  504.75   13.65
   5  -4   6  521.19   13.16
  -5  -4  -7 4882.85   73.42
   5  -4   7 4921.57   72.76
  -5   4  -7 4796.60   72.80
   5  -4   7 4860.37   72.55
   5   4   7 4931.90   72.69
   5  -4   8 1061.21   22.31
   5   4   8 1073.19   22.40
  -5  -4  -8 1114.04   22.92
   5  -4   8 1076.86   22.46
  -5  -4  -8 1063.48   22.56
  -5   4  -8 1049.52   22.43
   5  -4   8 1069.72   22.28
   5   4   8 1063.49   22.20
   5  -4   9 5195.01   77.66
   5   4   9 5140.74   77.58
  -5  -4  -9 5246.79   78.21
   5  -4   9 4977.64   77.48
  -5   4  -9 5154.02   77.73
  -5  -4  -9 5057.69   77.57
   5  -4   9 5193.26   77.56
   5   4   9 5212.35   77.53
   5   4  10  837.88   19.80
   5  -4  10  872.86   20.11
  -5  -4 -10  872.96   20.24
   5  -4  10  824.77   19.83
  -5   4 -10  848.75   20.11
  -5  -4 -10  836.45   19.90
   5  -4  10  870.93   19.98
   5   4  10  843.21   19.64
   5  -4  11 2403.40   42.16
   5   4  11 2399.24   42.08
   5  -4  11 2405.08   42.06
   5   4  11 2373.74   41.92
  -5  -4 -11 2464.15   42.15
  -5  -4 -11 2374.06   41.89
  -5   4 -11 2434.62   42.29
   5  -4  11 2303.84   41.81
  -5  -4 -12   38.46    4.04
  -5  -4 -12   37.65    4.07
  -5   4 -12   38.93    4.17
  -5  -4 -13 2380.97   41.21
  -5  -4 -13 2398.88   41.62
  -5   4 -13 2389.85   41.81
  -5  -4 -14   65.21    4.68
  -5   4 -14   61.48    4.86
  -5  -4 -14   64.97    4.90
  -5  -4 -15 1153.82   21.56
  -5  -4 -15 1129.18   22.73
  -5   4 -15 1132.47   22.87
  -5  -4 -16   83.97    4.64
  -5   4 -16   89.17    4.81
  -5  -4 -17  483.83   10.59
  -5   4 -17  484.35   10.71
  -5  -4 -18  115.84    3.51
  -5   4 -18  115.45    3.54
   5   5 -19  566.48   10.95
   5  -5 -19  563.91   10.79
   5  -5 -18   10.64    1.77
   5  -5 -18   11.68    1.86
   5   5 -18   10.69    1.83
   5  -5 -17 1333.83   23.50
   5   5 -17 1366.64   23.72
   5  -5 -17 1314.14   23.42
   5  -5 -16   15.97    2.44
   5  -5 -16   15.58    2.70
  -5  -5  16   11.17    2.47
   5  -5 -15 1427.33   28.46
   5  -5 -15 1415.09   26.86
   5   5 -15 1426.49   27.77
   5  -5 -15 1430.54   27.94
   5  -5 -14  147.28    7.58
   5  -5 -14  150.55    7.09
   5   5 -14  150.82    7.31
   5  -5 -14  147.87    7.29
   5  -5 -13 3156.91   53.05
   5  -5 -13 3238.37   51.56
   5   5 -13 3152.96   51.71
   5  -5 -13 3188.58   52.12
   5  -5 -12   18.34    3.18
   5   5 -12   19.55    2.53
   5  -5 -12   15.94    2.45
  -5  -5  12   15.58    2.91
   5  -5 -12   16.16    2.72
   5   5 -12   19.50    2.95
   5  -5 -11 5249.06   77.28
   5   5 -11 5064.60   75.35
   5  -5 -11 5092.96   75.60
   5   5 -11 5016.35   74.25
   5  -5 -11 4954.30   74.43
   5  -5 -10   10.56    2.57
   5   5 -10    6.26    1.66
   5  -5 -10    7.43    1.74
   5  -5 -10    7.44    2.37
  -5  -5  10    8.87    2.28
   5   5  -9 6785.60   97.03
   5  -5  -9 6865.63   97.30
  -5  -5   9 6659.01   99.62
   5  -5  -9 6967.24   99.04
   5   5  -8   22.48    2.67
  -5   5   8   31.27    3.19
   5   5  -8   27.24    2.72
   5  -5  -8   27.46    2.71
  -5  -5   8   28.16    3.16
  -5   5   7 5532.53   81.46
   5  -5  -7 5704.31   81.78
   5  -5  -7 5449.91   83.15
   5   5  -7 5645.54   81.06
   5  -5  -7 5679.21   81.26
  -5  -5   6   79.49    4.56
   5  -5  -6   68.71    4.54
   5  -5  -6   70.64    4.08
   5   5  -6   69.51    4.07
   5  -5  -5 5136.29   75.42
   5   5  -5 5104.93   74.53
   5  -5  -5 5067.93   74.36
  -5  -5   4   33.37    2.60
   5  -5  -4   34.30    2.90
  -5  -5   3 3932.63   55.24
   5  -5  -3 3860.82   57.40
  -5  -5   2  294.04    6.40
   5  -5  -2  300.65    8.41
   5  -5  -1 2323.45   35.97
   5  -5   0   35.39    2.67
   5  -5   0   30.02    2.45
   5  -5   1 1213.95   21.23
   5  -5   1 1183.05   21.02
   5  -5   2   22.57    2.34
   5  -5   2   22.23    2.25
   5  -5   3 1371.05   23.97
   5  -5   3 1399.52   24.46
   5  -5   4   11.90    1.81
   5  -5   4    6.20    1.53
  -5  -5  -5  424.91   12.09
   5  -5   5  418.34   10.43
   5  -5   5  422.43   11.51
  -5   5  -6   14.14    2.42
   5  -5   6   20.47    2.64
   5  -5   6   14.93    1.92
  -5  -5  -6   16.19    2.69
   5  -5   6   14.35    2.86
   5  -5   7   23.35    2.87
  -5  -5  -7   23.73    3.11
  -5   5  -7   27.98    3.22
   5  -5   7   22.23    3.46
  -5  -5  -8    6.24    2.27
   5  -5   8    5.05    1.63
   5   5   8    5.40    1.66
  -5   5  -8    3.81    2.09
  -5  -5  -8    1.93    1.96
   5  -5   8    2.62    1.53
  -5  -5  -9    1.68    2.07
   5  -5   9    1.64    1.47
   5   5   9    1.23    1.34
  -5   5  -9    5.08    2.27
  -5  -5  -9    3.52    2.18
   5  -5   9    3.98    1.81
   5  -5  10    3.20    1.71
   5  -5  10    1.72    1.48
   5   5  10    2.56    1.53
  -5  -5 -10    2.49    2.11
  -5   5 -10    2.46    2.02
  -5  -5 -10    3.19    2.02
   5  -5  10    2.11    1.55
   5  -5  11    7.69    2.18
   5  -5  11    5.89    1.86
   5   5  11    7.92    2.09
  -5   5 -11    8.28    2.54
  -5  -5 -11    7.91    2.50
  -5  -5 -11   14.67    3.01
  -5   5 -12   83.56    5.72
  -5  -5 -12   83.45    5.67
  -5  -5 -12   90.09    5.93
  -5   5 -13  229.84    9.16
  -5  -5 -13  220.61    9.03
  -5  -5 -13  225.54    9.12
  -5  -5 -14   20.22    2.98
  -5   5 -14   19.43    3.02
  -5  -5 -14   21.26    3.01
  -5   5 -15  526.24   13.36
  -5  -5 -15  517.11   13.27
  -5  -5 -15  539.48   13.01
  -5   5 -16   23.59    2.53
  -5  -5 -16   22.87    2.53
  -5  -5 -16   22.76    2.18
  -5   5 -17  453.47    9.56
  -5  -5 -17  448.76    9.45
   5  -6 -18   74.47    3.70
   5   6 -18   74.65    3.59
   5  -6 -18   73.32    3.50
  -5  -6  17  419.98   11.12
   5   6 -17  445.23   10.81
   5  -6 -17  444.14   10.75
   5  -6 -17  458.72   11.27
  -5  -6  16   49.31    4.16
   5  -6 -16   44.39    3.64
   5  -6 -16   44.51    4.05
   5   6 -16   58.67    3.88
   5  -6 -16   48.61    3.59
   5   6 -15  169.20    7.46
   5  -6 -15  155.85    7.28
   5  -6 -15  164.65    7.96
   5  -6 -15  168.71    7.28
   5  -6 -14   18.20    2.78
   5   6 -14   16.56    2.68
   5  -6 -14   16.27    2.78
   5  -6 -14   19.61    3.16
   5   6 -13  438.24   12.94
   5  -6 -13  437.78   13.07
   5  -6 -13  445.06   14.00
   5  -6 -13  448.46   13.11
   5  -6 -12  140.61    7.56
   5   6 -12  129.03    6.19
   5  -6 -12  130.68    6.32
  -5  -6  12  131.23    7.51
   5  -6 -12  137.76    6.97
   5   6 -12  134.51    6.74
   5  -6 -12  135.50    6.86
   5   6 -11  667.26   16.44
   5  -6 -11  669.40   16.65
  -5  -6  11  650.89   17.79
   5  -6 -11  695.28   17.99
   5   6 -11  667.19   15.78
   5  -6 -11  655.38   15.85
  -5  -6  10  191.83    8.73
   5  -6 -10  210.75    8.60
   5   6 -10  198.64    7.61
   5  -6 -10  193.63    7.60
  -5  -6   9   47.62    4.25
   5  -6  -9   50.65    3.78
   5   6  -9   49.83    3.69
   5  -6  -9   49.77    4.24
   5  -6  -8    8.16    2.14
   5  -6  -8    6.30    1.57
   5   6  -8    7.85    1.67
  -5   6   8    6.99    2.04
   5  -6  -8    7.75    2.04
  -5  -6   8    8.55    2.05
   5   6  -7  353.94    9.90
   5  -6  -7  343.73    9.88
  -5   6   7  345.23   10.17
   5  -6  -7  360.93   10.63
  -5  -6   7  379.06   11.40
  -5  -6   7  367.86   10.93
   5  -6  -7  341.85   11.08
   5  -6  -6   66.51    4.20
   5   6  -6   66.03    3.92
   5  -6  -6   67.91    4.00
  -5  -6   6   72.94    4.37
   5  -6  -6   66.05    4.53
   5  -6  -5  978.21   19.10
   5   6  -5 1013.21   19.27
  -5  -6   5 1021.20   19.26
   5  -6  -5  978.58   20.31
   5  -6  -4   82.20    4.59
  -5  -6   4   85.02    3.94
   5  -6  -3 1324.50   23.94
  -5  -6   3 1311.85   21.12
   5  -6  -2   87.92    4.45
   5  -6  -1 2088.78   33.37
   5  -6   0  133.29    5.29
   5  -6   0  132.95    5.47
   5  -6   1 3509.24   52.81
   5  -6   1 3615.20   53.22
   5  -6   2  488.59   11.65
   5  -6   2  488.45   11.91
   5  -6   3 4271.65   61.08
   5  -6   3 4000.77   60.75
   5  -6   4  208.44    7.48
   5  -6   4  211.54    7.28
  -5   6  -5 4317.30   63.51
  -5  -6  -5 4268.02   65.39
   5  -6   5 4389.19   64.55
   5  -6   5 4191.59   62.94
   5  -6   6  226.53    9.12
  -5   6  -6  238.72    8.40
  -5  -6  -6  241.74    9.19
   5  -6   6  248.34    8.84
   5  -6   6  247.57    7.98
   5  -6   7 2765.41   48.26
  -5  -6  -7 2942.15   46.83
  -5   6  -7 2849.70   46.44
  -5  -6  -7 2944.82   48.10
   5  -6   7 2973.20   47.50
   5  -6   7 2860.05   44.85
  -5  -6  -8  479.34   13.87
   5  -6   8  448.33   13.32
  -5  -6  -8  450.09   12.95
  -5   6  -8  438.60   12.81
   5  -6   8  438.80   14.11
   5  -6   9 4725.64   73.02
  -5  -6  -9 4702.48   72.20
  -5   6  -9 4547.81   71.79
   5  -6  10   44.46    4.20
  -5   6 -10   43.14    4.18
  -5  -6 -10   48.46    4.36
  -5  -6 -10   51.79    4.70
   5  -6  11 2748.32   48.04
  -5   6 -11 2772.02   47.04
  -5  -6 -11 2856.01   47.50
  -5  -6 -12  234.97    9.30
  -5   6 -12  222.34    9.02
  -5  -6 -12  230.37    9.58
  -5  -6 -13 2609.06   43.10
  -5   6 -13 2523.80   42.69
  -5  -6 -13 2561.52   43.78
  -5  -6 -14  158.45    6.93
  -5   6 -14  154.60    6.84
  -5  -6 -14  149.08    7.04
  -5   6 -15 1562.95   27.22
  -5  -6 -15 1584.39   27.30
  -5  -6 -15 1564.13   27.62
  -5   6 -16  164.02    5.59
  -5  -6 -16  163.50    5.55
  -5  -6 -16  176.05    5.67
  -5   6 -17 1067.57   16.12
  -5  -6 -17 1039.16   15.96
   5  -7 -18  395.08    8.04
  -5  -7  18  336.62    8.20
   5   7 -17  791.83   15.18
   5  -7 -17  762.49   14.86
  -5  -7  17  768.62   16.11
   5   7 -16  568.31   12.76
   5  -7 -16  539.96   12.45
   5  -7 -16  571.86   13.68
   5  -7 -15 1186.84   22.58
  -5  -7  15 1208.97   25.83
   5  -7 -15 1260.42   24.41
   5  -7 -15 1287.80   26.12
   5   7 -14  684.88   16.52
   5  -7 -14  671.25   16.53
   5  -7 -14  691.70   16.81
   5  -7 -14  701.54   18.16
   5   7 -13 2899.08   47.82
   5  -7 -13 2915.78   48.02
   5  -7 -13 2999.66   48.68
   5  -7 -13 2986.70   50.40
   5   7 -12 1707.67   31.47
   5  -7 -12 1680.52   31.58
   5  -7 -12 1726.75   33.70
   5   7 -11 2713.64   43.46
   5  -7 -11 2651.63   43.50
   5   7 -11 2792.33   44.66
   5  -7 -11 2735.47   44.80
  -5  -7  11 2654.76   46.83
   5  -7 -11 2631.95   45.20
   5  -7 -10 1206.56   24.51
   5  -7 -10 1182.38   23.13
   5   7 -10 1146.59   22.77
   5   7 -10 1156.16   23.47
   5  -7 -10 1235.04   24.11
   5  -7 -10 1211.15   25.87
  -5  -7  10 1224.44   25.84
   5   7  -9 2904.70   46.69
   5  -7  -9 2939.36   46.92
  -5  -7   9 3068.88   48.23
  -5  -7   9 3055.27   50.01
   5  -7  -9 3008.50   50.20
   5  -7  -9 3052.11   48.61
   5  -7  -8 1040.89   20.77
   5   7  -8 1030.73   20.52
   5  -7  -8 1028.96   23.19
  -5  -7   8 1121.37   23.01
  -5  -7   8 1105.62   22.52
   5  -7  -8 1057.33   23.08
   5  -7  -8 1093.56   21.71
  -5  -7   7 1637.97   29.36
   5   7  -7 1433.35   26.02
   5  -7  -7 1471.48   26.27
   5  -7  -7 1476.88   27.92
  -5  -7   7 1589.57   28.35
   5  -7  -7 1439.56   28.83
  -5  -7   6 1452.47   27.29
   5   7  -6 1272.14   23.47
   5  -7  -6 1276.18   23.55
   5  -7  -6 1284.32   24.70
   5  -7  -6 1254.84   25.72
  -5  -7   6 1455.08   25.15
   5   7  -5 4268.50   64.10
   5  -7  -5 4328.59   64.20
   5  -7  -5 4241.93   65.03
   5  -7  -5 4279.71   66.45
   5  -7  -4 1211.11   23.33
   5   7  -4 1176.01   21.97
   5  -7  -4 1141.94   21.82
   5  -7  -3 3019.47   47.38
   5  -7  -2  918.67   18.57
   5  -7  -1 2888.35   44.60
   5  -7   0  146.92    6.07
   5  -7   0  151.38    5.92
   5  -7   1 2060.22   34.14
   5  -7   1 2040.43   33.52
   5  -7   2  383.90   10.66
   5  -7   2  363.09   10.00
   5  -7   3  328.66    9.86
   5  -7   3  333.58    9.77
   5  -7   3  338.11    9.82
   5  -7   4  445.01   11.92
   5  -7   4  462.84   12.09
   5  -7   4  452.64   12.23
   5  -7   5  425.98   11.42
   5  -7   5  426.01   11.86
  -5  -7  -6  235.03    9.12
   5  -7   6  229.90    8.01
   5  -7   6  237.35    8.75
   5  -7   7   48.14    4.58
  -5  -7  -7   52.67    4.51
   5  -7   7   57.29    4.43
   5  -7   7   56.87    3.93
  -5  -7  -7   56.49    4.23
  -5   7  -7   57.92    4.19
  -5  -7  -8    0.76    2.00
  -5  -7  -8   12.19    2.54
  -5   7  -8   10.58    2.39
   5  -7   8    2.04    2.10
   5  -7   8    4.42    1.77
  -5  -7  -9   40.60    4.29
   5  -7   9   37.49    4.49
  -5   7  -9   55.99    4.44
  -5  -7  -9   47.08    4.19
   5  -7   9   49.01    4.34
  -5  -7 -10   40.38    4.30
  -5   7 -10   37.25    3.76
  -5  -7 -10   39.60    3.93
   5  -7  10   39.38    3.98
  -5  -7 -11   10.36    2.57
  -5  -7 -11    8.52    2.59
  -5   7 -12    7.93    2.33
  -5  -7 -12    7.81    2.32
  -5  -7 -12    5.42    2.41
  -5  -7 -13  337.43   10.46
  -5   7 -13  335.06   10.30
  -5  -7 -13  321.52   11.12
  -5  -7 -14  386.77   10.47
  -5   7 -14  376.07   10.31
  -5  -7 -14  359.16   11.31
  -5  -7 -15  586.14   12.49
  -5   7 -15  586.59   12.49
  -5  -7 -15  583.89   13.74
  -5  -7 -16  249.48    6.12
  -5   7 -16  253.50    6.17
  -5  -7 -16  262.00    7.03
   5  -7  17  438.53    8.79
   5  -8 -18  831.88   13.76
  -5  -8  18  580.61   11.71
   5  -8 -17  445.47   10.65
  -5  -8  17  381.04   10.04
  -5  -8  16  273.64    9.44
   5  -8 -16  260.20    7.40
   5  -8 -15  164.62    7.07
   5  -8 -15  166.27    7.88
  -5  -8  15  165.94    7.88
   5   8 -15  154.63    5.97
   5  -8 -15  151.40    5.89
  -5  -8  14   75.99    5.75
   5  -8 -14   74.71    5.02
   5  -8 -14   76.71    5.57
   5   8 -13  124.20    6.15
   5  -8 -13  117.16    6.05
   5  -8 -13  129.80    6.72
   5   8 -12  339.47   10.61
   5  -8 -12  336.33   10.65
   5  -8 -12  337.69   11.34
   5  -8 -11  192.97    8.16
  -5  -8  11  195.06    9.01
   5  -8 -11  195.76    7.83
   5  -8 -11  203.25    9.16
  -5  -8  10   74.20    4.83
   5  -8 -10   73.93    5.06
  -5  -8  10   78.29    5.62
   5  -8 -10   73.21    4.38
   5  -8 -10   78.86    5.74
   5  -8 -10   80.17    4.89
   5  -8  -9    1.54    1.42
  -5  -8   9    4.96    1.85
   5  -8  -9    3.16    2.07
   5  -8  -9    2.05    1.21
  -5  -8   9    3.71    1.77
   5  -8  -9    7.36    2.06
   5  -8  -8   46.30    3.41
  -5  -8   8   46.42    4.11
   5  -8  -8   53.20    4.29
   5  -8  -8   44.21    4.20
   5  -8  -8   47.92    4.31
  -5  -8   8   49.26    4.18
   5  -8  -8   42.49    3.69
   5  -8  -7  173.27    6.55
  -5  -8   7  190.87    8.24
   5  -8  -7  169.78    7.43
   5  -8  -7  183.85    8.14
   5  -8  -7  178.31    7.01
  -5  -8   7  191.29    7.73
   5  -8  -7  168.67    7.86
   5  -8  -6  277.59    9.38
  -5  -8   6  309.77    9.31
   5  -8  -6  279.80   10.09
   5   8  -6  275.85    8.24
   5  -8  -6  276.58    8.33
  -5  -8   5  687.32   17.48
   5  -8  -5  603.35   14.57
  -5  -8   5  676.64   13.89
   5  -8  -5  627.58   15.63
   5   8  -5  585.77   13.34
   5  -8  -5  597.61   13.45
   5   8  -4  429.41   10.64
   5  -8  -4  420.67   10.54
   5  -8  -4  449.19   12.40
   5  -8  -4  438.30   11.54
   5  -8  -3  678.12   15.22
   5  -8  -3  705.95   16.28
   5  -8  -2 1596.74   28.20
   5  -8  -2 1615.94   29.46
  -5  -8   2 1812.57   34.10
   5  -8  -2 1732.05   29.53
   5  -8  -1  976.14   18.98
   5  -8  -1  942.90   20.20
   5  -8   0 2138.23   34.95
   5  -8   0 2089.31   36.40
   5  -8   0 2168.25   36.10
   5  -8   1 1675.94   28.94
   5  -8   1 1628.78   29.97
   5  -8   1 1708.57   29.95
   5  -8   1 1747.01   29.32
   5  -8   2 3402.38   52.57
   5  -8   2 3480.53   52.57
   5  -8   2 3455.69   53.50
   5  -8   3  518.97   13.07
   5  -8   3  512.61   12.71
   5  -8   4 1822.33   32.28
   5  -8   4 1830.97   31.79
   5  -8   4 1801.87   32.02
  -5  -8  -5  790.18   18.76
   5  -8   5  848.38   18.38
   5  -8   5  819.27   18.66
   5  -8   5  815.11   17.88
   5  -8   5  796.79   18.74
   5  -8   6 1621.76   29.79
   5  -8   6 1698.18   30.67
   5  -8   7 1114.04   24.69
   5  -8   7 1160.80   24.00
   5  -8   7 1149.73   22.89
  -5  -8  -7 1159.36   22.28
  -5  -8  -8 2824.40   45.34
   5  -8   8 2734.22   48.58
   5  -8   8 2848.88   47.40
  -5  -8  -8 2914.07   48.20
   5  -8   9  904.77   22.56
   5  -8   9  963.64   21.91
  -5  -8  -9  939.28   22.15
  -5   8 -10 1436.10   27.43
  -5  -8 -10 1517.29   27.82
   5  -8  10 1431.38   30.64
  -5  -8 -10 1488.04   29.89
   5  -8  10 1491.30   29.57
  -5   8 -11 1251.31   24.31
  -5  -8 -11 1286.00   24.56
   5  -8  11 1227.52   23.80
  -5  -8 -11 1271.26   26.69
  -5  -8 -12  870.90   18.34
  -5   8 -12  844.66   18.07
  -5  -8 -12  842.50   20.18
  -5  -8 -13 1138.95   21.04
  -5   8 -13 1085.76   20.70
  -5  -8 -13 1076.62   23.22
  -5   8 -14  981.61   18.06
  -5  -8 -14 1000.02   18.16
  -5  -8 -14  992.16   20.83
  -5  -8 -15  449.87    9.42
  -5  -8 -15  497.31   11.90
   5  -8  16  400.70    9.60
  -5  -8 -16  449.40    9.63
   5  -9 -18  672.17   12.47
   5  -9 -17   86.24    4.20
  -5  -9  17   81.16    4.02
   5  -9 -16 1118.54   20.96
  -5  -9  16 1043.51   21.17
   5  -9 -15  174.16    7.16
  -5  -9  15  163.16    7.64
   5  -9 -14 1445.21   27.36
  -5  -9  14 1431.56   29.03
   5  -9 -13  372.98   11.73
  -5  -9  13  373.38   13.40
   5  -9 -12 1748.54   31.43
   5  -9 -12 1922.66   35.43
  -5  -9  11  507.23   13.49
   5  -9 -11  530.27   15.46
   5  -9 -10 1960.23   35.63
  -5  -9  10 2098.68   37.87
   5  -9 -10 2070.14   38.25
  -5  -9  10 2105.34   36.39
   5  -9 -10 2097.31   37.13
  -5  -9   9  352.18   11.73
   5  -9  -9  349.85   12.05
   5  -9  -9  334.42   10.72
  -5  -9   9  344.09   11.24
  -5  -9   8 2248.70   38.45
   5  -9  -8 2133.27   37.88
   5  -9  -8 2134.88   38.64
   5  -9  -8 2028.77   38.78
  -5  -9   8 2246.26   37.91
   5  -9  -8 2074.98   36.07
  -5  -9   7  379.72   12.28
   5  -9  -7  353.72   11.30
   5  -9  -7  355.77   11.82
  -5  -9   7  377.14   11.04
   5  -9  -7  342.30   11.84
   5  -9  -7  347.28   10.39
   5  -9  -6 3156.09   51.05
   5  -9  -6 3114.14   49.56
   5  -9  -6 3089.79   52.38
   5  -9  -5  879.83   18.59
   5  -9  -5  886.30   19.27
   5  -9  -5  917.14   20.44
   5  -9  -4 4017.54   61.77
   5  -9  -4 3959.72   59.33
   5  -9  -3  544.78   12.19
   5  -9  -3  565.77   13.69
  -5  -9   2 4007.21   63.60
   5  -9  -2 3891.90   58.52
   5  -9  -1  369.77   10.64
   5  -9  -1  327.94   10.76
  -5  -9   1  384.25   13.33
   5  -9  -1  349.57   10.02
   5  -9   0 2136.95   35.73
   5  -9   0 2110.97   37.39
   5  -9   0 2178.57   36.96
   5  -9   1  453.70   11.92
   5  -9   1  431.42   12.39
   5  -9   1  436.67   12.34
   5  -9   1  431.00   11.58
   5  -9   2 2357.77   39.89
   5  -9   2 2374.31   38.80
   5  -9   2 2344.66   38.85
   5  -9   3   63.07    4.48
   5  -9   3   65.89    4.40
   5  -9   3   62.34    4.19
   5  -9   4 1182.21   23.71
   5  -9   4 1163.76   22.86
   5  -9   4 1172.64   23.46
   5  -9   4 1128.90   23.28
  -5  -9  -4 1136.21   24.14
   5  -9   5  141.42    7.08
   5  -9   5  145.89    6.65
   5  -9   5  152.53    7.09
   5  -9   5  145.74    6.77
  -5  -9  -5  138.38    7.13
   5  -9   6  240.52    9.67
   5  -9   6  243.54    9.10
   5  -9   6  247.05    8.98
  -5  -9  -6  233.03    9.56
   5  -9   6  255.70    9.57
   5  -9   7  133.93    6.69
   5  -9   7  127.43    6.37
   5  -9   8   33.77    3.64
   5  -9   8   27.25    3.11
   5  -9   8   30.61    3.94
   5  -9   9   23.64    3.07
   5  -9   9   20.93    3.47
  -5  -9  -9   18.37    3.19
  -5  -9 -10   79.97    5.73
   5  -9  10   66.29    5.70
  -5  -9 -10   72.99    4.39
  -5  -9 -11    3.68    1.67
  -5  -9 -11    3.00    2.21
  -5  -9 -12  509.54   11.81
  -5  -9 -12  513.44   14.65
  -5  -9 -13    6.88    2.32
  -5  -9 -14  346.16   10.50
   5  -9  14  352.26   10.32
  -5  -9 -15   50.08    3.47
   5  -9  15   50.93    3.37
  -5  -9 -16  497.18    9.86
   5  -9  16  441.63    9.59
  -5 -10  17    2.42    1.22
   5 -10 -17    2.50    1.27
  -5 -10  16  788.77   17.00
   5 -10 -16  887.77   17.18
  -5 -10  15    0.85    1.69
   5 -10 -15    2.16    1.73
  -5 -10  14  241.70    9.70
   5 -10 -14  257.51    9.05
   5 -10 -13   59.21    4.94
  -5 -10  13   52.34    5.06
   5 -10 -12  162.35    8.19
  -5 -10  12  165.56    8.96
   5 -10 -11   88.17    5.20
  -5 -10  11  107.78    5.84
   5 -10 -11  103.53    6.54
   5 -10 -11  105.58    6.15
  -5 -10  11   92.24    7.08
  -5 -10  10    3.34    1.77
   5 -10 -10    5.50    2.23
   5 -10 -10    3.41    1.91
   5 -10 -10    4.36    2.12
  -5 -10   9   61.67    4.78
   5 -10  -9   66.86    4.93
   5 -10  -9   56.78    4.22
   5 -10  -9   61.94    5.13
   5 -10  -8  232.12    9.60
   5 -10  -8  231.53    9.88
   5 -10  -8  226.47    8.32
  -5 -10   8  239.08    9.50
   5 -10  -8  239.91    9.43
   5 -10  -7  238.15    9.49
   5 -10  -7  249.05   10.04
   5 -10  -7  225.70    8.20
  -5 -10   7  241.94    9.86
   5 -10  -7  228.55    9.05
   5 -10  -6  678.27   17.00
   5 -10  -6  644.46   17.11
   5 -10  -6  640.38   15.11
   5 -10  -6  653.17   16.23
   5 -10  -5  344.34   11.13
   5 -10  -5  327.33   10.05
   5 -10  -5  339.81   10.67
   5 -10  -5  326.69   11.30
   5 -10  -4  399.90   11.42
   5 -10  -4  389.71   11.39
   5 -10  -4  406.52   12.39
   5 -10  -3  174.64    7.44
  -5 -10   3  184.09    9.08
   5 -10  -3  175.97    7.59
   5 -10  -3  168.06    6.97
   5 -10  -2 1371.83   25.97
   5 -10  -2 1430.33   27.16
   5 -10  -1   34.19    3.15
   5 -10  -1   32.68    3.57
   5 -10   0 2491.33   40.11
   5 -10   0 2494.38   41.26
  -5 -10   0 2552.20   46.42
   5 -10   1    8.96    2.42
   5 -10   1    6.68    1.80
   5 -10   1   12.88    2.16
  -5 -10  -1    8.51    2.91
  -5 -10  -2 3032.79   48.59
   5 -10   2 3042.74   47.72
   5 -10   2 2930.42   47.69
   5 -10   2 2888.87   48.71
  -5 -10  -2 3047.17   53.66
   5 -10   3   88.59    5.39
   5 -10   3   94.47    5.66
  -5 -10  -3   81.36    5.52
   5 -10   3   85.48    5.14
   5 -10   4 2358.71   39.86
   5 -10   4 2355.36   39.43
   5 -10   4 2212.39   39.50
  -5 -10  -4 2230.38   40.07
   5 -10   5   34.64    3.92
   5 -10   5   29.46    3.38
  -5 -10  -5   34.76    3.81
   5 -10   5   35.07    3.56
   5 -10   6 5084.36   76.22
   5 -10   6 5177.39   75.62
   5 -10   6 4819.56   74.49
  -5 -10  -6 4697.24   75.38
  -5 -10  -7   10.24    2.87
   5 -10   7   14.21    2.79
   5 -10   7    4.86    1.77
  -5 -10  -7   18.61    3.18
   5 -10   8 3019.30   51.25
   5 -10   8 2924.41   48.56
   5 -10   9   12.96    3.18
   5 -10   9   13.19    2.74
  -5 -10 -10 2034.05   37.32
   5 -10  10 2047.91   38.38
  -5 -10 -11    2.16    1.97
   5 -10  11    3.45    1.86
   5 -10  12 1986.87   34.74
  -5 -10 -12 1896.04   35.00
   5 -10  13   43.84    3.70
  -5 -10 -13   38.61    3.80
   5 -10  14 1374.88   24.79
  -5 -10 -14 1409.83   25.35
   5 -10  15    4.69    1.34
  -5 -10 -15    2.42    1.36
   5 -10  16  702.10   12.82
  -5 -10 -16  818.70   13.28
  -5 -11  17   24.64    1.97
   5 -11 -17   32.50    2.28
  -5 -11  16 1107.22   20.79
   5 -11 -16 1238.41   21.09
  -5 -11  15   55.40    4.10
  -5 -11  14 1374.26   27.03
  -5 -11  13  122.58    7.15
   5 -11 -13  122.11    6.22
   5 -11 -12 1845.64   34.81
  -5 -11  12 1803.48   35.39
  -5 -11  12 1838.90   32.10
   5 -11 -12 1838.21   33.21
  -5 -11  11   93.66    5.55
   5 -11 -11   96.36    5.83
   5 -11 -11   90.74    6.14
  -5 -11  10 3038.98   48.83
   5 -11 -10 2998.57   48.74
   5 -11 -10 3011.55   50.37
  -5 -11   9  179.01    8.16
  -5 -11   9  183.24    9.54
   5 -11  -9  167.55    7.17
   5 -11  -9  187.79    8.19
   5 -11  -9  178.92    8.50
  -5 -11   8 2974.55   48.40
   5 -11  -8 2844.54   47.46
  -5 -11   8 2668.11   49.91
   5 -11  -8 2714.37   44.64
   5 -11  -8 2847.71   46.86
   5 -11  -8 2775.60   47.87
  -5 -11   7  257.66   10.37
   5 -11  -7  251.23    9.62
   5 -11  -7  235.28    8.41
   5 -11  -7  249.35    9.41
   5 -11  -7  254.38    9.87
   5 -11  -6 2519.90   42.45
   5 -11  -6 2377.94   40.27
   5 -11  -6 2479.99   42.67
   5 -11  -5  358.21   11.21
   5 -11  -5  337.25   10.36
   5 -11  -5  338.52   11.08
   5 -11  -4 3366.47   52.98
   5 -11  -4 3298.24   51.32
   5 -11  -4 3425.00   53.52
  -5 -11   4 3313.67   55.96
   5 -11  -3   90.61    5.45
   5 -11  -3   85.84    5.05
  -5 -11   3   97.09    6.80
   5 -11  -3   89.34    5.20
  -5 -11   3   77.32    5.42
  -5 -11   2 2206.93   41.00
   5 -11  -2 2038.01   35.70
   5 -11  -1  289.48    9.58
  -5 -11   0 2179.37   41.26
   5 -11   0 2031.60   37.02
   5 -11   0 2109.50   35.61
  -5 -11   0 2075.17   34.60
   5 -11   0 2086.36   36.78
   5 -11   0 1997.46   34.79
  -5 -11  -1   88.06    5.19
   5 -11   1   88.62    5.52
   5 -11   1   93.46    5.29
  -5 -11  -1   96.98    6.95
   5 -11   1   89.77    5.75
   5 -11   1   85.65    5.11
  -5 -11  -2  881.00   22.91
   5 -11   2  874.88   20.18
   5 -11   2  855.74   19.02
   5 -11   2  865.69   19.06
  -5 -11  -2  856.17   19.49
  -5 -11  -3    5.17    2.15
   5 -11   3   14.51    2.59
  -5 -11  -3    5.15    2.58
   5 -11   3   15.44    2.68
   5 -11   3    6.18    1.96
  -5 -11  -4  149.39    8.76
   5 -11   4  127.65    6.96
   5 -11   4  144.23    7.19
   5 -11   4  140.20    6.79
  -5 -11  -4  134.32    7.21
   5 -11   5  437.01   12.88
  -5 -11  -5  435.68   15.12
   5 -11   5  402.82   12.77
   5 -11   5  444.34   13.55
   5 -11   5  436.46   12.50
  -5 -11  -5  410.76   13.29
   5 -11   6  357.91   11.67
  -5 -11  -6  358.98   13.35
   5 -11   6  338.34   10.98
   5 -11   6  360.80   12.12
   5 -11   6  331.44   11.31
  -5 -11  -6  327.91   11.75
  -5 -11  -7   14.64    3.01
  -5 -11  -7   14.92    3.02
   5 -11   7   18.43    2.93
   5 -11   7   14.59    2.40
   5 -11   7   18.83    3.24
   5 -11   7   17.71    2.77
  -5 -11  -8    9.35    2.68
   5 -11   8    8.14    2.36
   5 -11   9   25.15    3.33
   5 -11   9   22.32    3.75
   5 -11  10   10.80    2.24
   5 -11  10    6.34    2.75
   5 -11  10    9.80    2.43
  -5 -11 -11   36.61    3.97
   5 -11  11   43.27    3.95
   5 -11  12  182.05    6.35
   5 -11  12  188.97    7.54
  -5 -11 -12  170.77    7.67
   5 -11  13   10.64    1.99
  -5 -11 -13   16.94    2.69
   5 -11  14  180.47    6.26
  -5 -11 -14  194.29    6.81
   5 -11  15    5.79    1.21
  -5 -11 -15    6.65    1.45
  -5 -12  16  194.36    6.15
  -5 -12  15  170.04    6.62
   5 -12 -14   75.97    4.45
  -5 -12  14   73.70    4.84
   5 -12 -13   79.27    4.83
  -5 -12  13   73.15    5.31
  -5 -12  12   23.89    2.85
   5 -12 -12   20.48    2.88
  -5 -12  12   21.30    3.47
  -5 -12  11   48.72    4.07
   5 -12 -11   41.95    4.27
   5 -12 -11   42.42    3.89
   5 -12 -10    5.21    2.08
   5 -12 -10    3.35    1.67
  -5 -12  10    6.27    2.17
   5 -12 -10    3.56    2.13
   5 -12  -9   20.97    3.26
  -5 -12   9   25.46    3.93
   5 -12  -9   17.67    2.59
  -5 -12   9   20.75    3.20
   5 -12  -9   21.96    3.11
   5 -12  -8   17.52    2.57
   5 -12  -8   12.75    2.70
   5 -12  -8   16.84    3.01
  -5 -12   8   16.21    3.54
  -5 -12   8   10.44    2.65
   5 -12  -8   13.27    2.67
   5 -12  -7  304.06   10.43
  -5 -12   7  311.20   11.49
   5 -12  -7  291.54   10.67
   5 -12  -7  285.39   11.27
   5 -12  -7  286.87    9.35
   5 -12  -7  301.52   10.77
  -5 -12   7  279.36   11.92
   5 -12  -6   81.37    5.26
  -5 -12   6   86.04    6.13
   5 -12  -6   79.98    5.36
   5 -12  -6   81.24    5.75
   5 -12  -6   81.72    5.43
  -5 -12   6   86.28    6.45
   5 -12  -6   80.85    4.80
  -5 -12   5  178.54    9.01
   5 -12  -5  158.11    6.87
   5 -12  -5  184.48    8.59
   5 -12  -5  176.81    7.77
  -5 -12   5  160.18    8.58
   5 -12  -5  169.32    7.33
   5 -12  -4  314.02   10.47
  -5 -12   4  295.20   11.39
   5 -12  -4  327.03   11.44
  -5 -12   4  329.73   12.47
   5 -12  -4  300.07    9.11
   5 -12  -4  305.87   10.06
   5 -12  -3   80.74    5.08
  -5 -12   3   65.20    5.01
   5 -12  -3   79.84    5.38
  -5 -12   3   73.84    6.08
   5 -12  -3   73.68    4.80
   5 -12  -3   72.72    5.00
   5 -12  -2  891.31   20.38
   5 -12  -2  864.99   19.22
   5 -12  -2  859.21   20.03
   5 -12  -1  340.70   11.28
   5 -12  -1  322.04   10.47
  -5 -12   1  328.84   13.17
   5 -12   0 1017.69   22.06
  -5 -12   0  970.59   24.90
   5 -12   0 1038.04   21.88
   5 -12   0  963.00   22.10
   5 -12   0 1007.84   21.15
  -5 -12   0  970.24   19.55
  -5 -12  -1 1033.26   24.99
   5 -12   1 1002.78   21.38
   5 -12   1  933.71   20.52
   5 -12   1 1025.13   21.17
   5 -12   1  983.43   22.12
   5 -12   1  975.44   21.89
  -5 -12  -1  925.79   20.04
  -5 -12  -2  721.48   20.34
   5 -12   2  670.83   16.86
   5 -12   2  734.10   17.28
   5 -12   2  714.49   17.02
   5 -12   2  727.13   18.06
  -5 -12  -2  695.59   16.88
  -5 -12  -3  211.38   10.64
   5 -12   3  239.53    9.08
   5 -12   3  220.99    8.58
   5 -12   3  225.04    8.75
   5 -12   3  217.46    9.17
  -5 -12  -3  226.81    9.10
  -5 -12  -4 4097.37   68.50
   5 -12   4 4104.53   64.33
   5 -12   4 4169.28   63.26
   5 -12   4 4237.83   63.94
   5 -12   4 4023.22   64.79
  -5 -12  -4 4014.54   64.89
  -5 -12  -5  785.06   21.15
   5 -12   5  832.07   19.52
   5 -12   5  792.05   18.28
   5 -12   5  817.64   18.92
   5 -12   5  731.91   18.91
  -5 -12  -5  759.33   19.28
   5 -12   6 3765.60   58.53
   5 -12   6 3536.35   56.16
  -5 -12  -6 3418.32   57.78
  -5 -12  -6 3459.51   59.03
   5 -12   6 3674.93   57.35
   5 -12   7  771.03   19.11
   5 -12   7  773.25   18.38
  -5 -12  -7  737.99   18.77
  -5 -12  -8 1983.88   37.23
   5 -12   8 2090.45   36.86
  -5 -12  -9  586.44   16.30
   5 -12   9  653.87   16.38
   5 -12  10 1760.56   34.07
  -5 -12 -10 1719.02   33.08
   5 -12  10 1783.05   30.85
   5 -12  11  538.86   13.79
   5 -12  12 1460.04   26.33
   5 -12  12 1480.53   24.57
  -5 -12 -13  646.35   14.73
   5 -12  13  655.83   14.01
  -5 -12 -14  619.29   12.72
   5 -12  14  584.29   12.00
  -5 -12 -15  547.74   10.10
   5 -12  15  490.65    9.43
   5 -13 -16  517.24    9.78
  -5 -13  16  490.57    9.86
   5 -13 -15  583.87   11.86
  -5 -13  15  539.93   12.15
   5 -13 -14  466.73   11.01
  -5 -13  14  436.62   11.51
   5 -13 -13  865.27   17.76
  -5 -13  13  835.37   18.83
   5 -13 -12 1107.88   22.17
  -5 -13  12 1153.75   21.97
   5 -13 -11  949.80   20.31
  -5 -13  11  975.87   20.58
   5 -13 -10 1279.35   25.24
  -5 -13  10 1302.45   25.93
  -5 -13  10 1245.54   27.41
   5 -13  -9 2381.46   39.71
  -5 -13   9 2173.84   42.08
   5 -13  -9 2187.03   37.04
  -5 -13   9 2446.70   40.92
   5 -13  -8 1337.93   27.53
  -5 -13   8 1365.21   29.60
   5 -13  -8 1323.86   24.94
   5 -13  -8 1383.67   26.92
   5 -13  -7 1456.24   27.82
  -5 -13   7 1529.58   30.13
[truncated: 241,256 more chars]
